# Supplementary material for: Tuning the properties of metal–organic framework nodes as supports of single-site iridium catalysts: node modification by atomic layer deposition of aluminium
Source: Royal Society of Chemistry journal article supplement (doi:10.1039/c7fd00031f), 2017-01-01
Supplement: c7fd00031f1.pdf [file c7fd00031f1.pdf]

## Supporting Information

### Tuning the Properties of Metal Organic Framework Nodes as Supports of Single-Site Catalysts

Dong Yang,<sup>a†</sup> Mohammad R. Momeni,<sup>b†</sup> Hakan Demir,<sup>b</sup> Dale R. Pahls,<sup>b</sup> Martino Rimoldi,<sup>c</sup> Timothy C. Wang,<sup>c</sup> Omar K. Farha,<sup>c,d</sup> Joseph T. Hupp,<sup>c</sup> Christopher J. Cramer\*,<sup>b</sup> Bruce C. Gates\*<sup>a</sup> and Laura Gagliardi\*<sup>b</sup>

<sup>†</sup>These two authors equally contributed to the paper

<sup>a</sup> Department of Chemical Engineering, University of California, Davis, California 95616, United States,  
E-mail: [bcgates@ucdavis.edu](mailto:bcgates@ucdavis.edu) (B.C.G.).

<sup>b</sup> Department of Chemistry, Chemical Theory Center, and Supercomputing Institute, University of Minnesota, Minneapolis, Minnesota 55455-0431, United States, Email: [cramer@umn.edu](mailto:cramer@umn.edu) (C.J.C.) [gagliardi@umn.edu](mailto:gagliardi@umn.edu) (L.G.)

<sup>c</sup> Department of Chemistry, Northwestern University, 2145 Sheridan Road, Evanston, Illinois 60208, United States

<sup>d</sup> Department of Chemistry, Faculty of Science, King Abdulaziz University, Jeddah 21589, Saudi Arabia

<sup>†</sup> These two authors contributed equally to the paper.

## Table of Contents

### Section 1. Experimental Results

|                                                                                                                                                                                                                                                         |                |
|---------------------------------------------------------------------------------------------------------------------------------------------------------------------------------------------------------------------------------------------------------|----------------|
| <b>Figure S1.</b> IR Spectra in the H Bonded H <sub>2</sub> O/OH Region Characterizing of Bare Al-NU-1000 (Black) And the Samples Formed by Adsorption of Ir(C <sub>2</sub> H <sub>4</sub> ) <sub>2</sub> (acac) on Them (Red).                         | <b>Page S3</b> |
| <b>Figure S2.</b> Mass Spectra Charactering the Effluent Gas after the NU-1000 Supported Ir(C <sub>2</sub> H <sub>4</sub> ) <sub>2</sub> Complex Had Been Treated in 10% CO/He for 3 min.                                                               | <b>Page S4</b> |
| <b>Figure S3.</b> IR spectra in the ν <sub>CO</sub> Region Characterizing Ir(C <sub>2</sub> H <sub>4</sub> ) <sub>2</sub> Supported on NU-1000 (Black) And on Al-NU-1000 (Red) After Contact with a Pulse of CO in Helium At 298 K And 1 Bar for 3 min. | <b>Page S5</b> |
| <b>Figure S4.</b> Long-term Activities During Ethylene Hydrogenation.                                                                                                                                                                                   | <b>Page S6</b> |
| <b>Figure S5.</b> Powder X-ray Diffraction of Ir(CO) <sub>2</sub> @Al-NU-1000                                                                                                                                                                           | <b>Page S6</b> |
| <b>Figure S6.</b> Nitrogen Physisorption Isotherm of Al-NU-1000                                                                                                                                                                                         | <b>Page S7</b> |
| <b>Figure S7.</b> Nitrogen Physisorption Isotherm of Ir(CO) <sub>2</sub> @Al-NU-1000                                                                                                                                                                    | <b>Page S7</b> |

### Section 2. Computational Results

|                                                                                                                                                                                                                                                   |                  |
|---------------------------------------------------------------------------------------------------------------------------------------------------------------------------------------------------------------------------------------------------|------------------|
| <b>Scheme S1.</b> M06-L Computed Relative Enthalpies (in kcal/mol) for Decorating NU-1000 with Al and In (in Parenthesis) Atoms. Taken with permission from Ref. [1].                                                                             | <b>Page S8</b>   |
| <b>Scheme S2.</b> Four Different Dehydrated Ir@Al-NU-1000 Isomers Considered in This Work.                                                                                                                                                        | <b>Page S9</b>   |
| <b>Figure S8.</b> Optimized Structures of Different Dehydrated Ir@Al-NU-1000 Isomers Considered in This Work. The Relative Stabilities, ΔH (ΔG in Parenthesis) Are Given in kcal/mol. All Frequencies (in cm <sup>-1</sup> ) Are Scaled by 0.956. | <b>Page S9</b>   |
| <b>Figure S9.</b> Optimized Cationic Ir(CO) <sub>2</sub> @Al <sub>2</sub> -NU-1000 Structures.                                                                                                                                                    | <b>Page S13</b>  |
| <b>Figure S10.</b> Optimized Mixed Al-OH/Zr-OH Ir(CO) <sub>2</sub> @Al <sub>2</sub> -NU-1000 Structure.                                                                                                                                           | <b>Page S14</b>  |
| <b>Figure S11.</b> Optimized Ir(CO) <sub>2</sub> @Al <sub>n</sub> -NU-1000 (n = 2, 4, and 8) Structures with Indirect Coordination.                                                                                                               | <b>Page S15</b>  |
| <b>Figure S12.</b> Optimized Under Coordinated Ir(CO) <sub>2</sub> @Al <sub>n</sub> -NU-1000 (n = 2, 4, and 8) Structures.                                                                                                                        | <b>Page S19</b>  |
| <b>Figure S13.</b> Optimized Selected Ir(CO) <sub>2</sub> @Al <sub>8</sub> -NU-1000 Isomers at the M06-L Density Functional.                                                                                                                      | <b>Page S20</b>  |
| <b>Figure S14.</b> Computed Mechanistic Pathway for Ethylene Dimerization on Different Supports.                                                                                                                                                  | <b>Page S23</b>  |
| <b>Table S1.</b> Computed Relative Electronic Energy Differences Between Selected Al <sub>8</sub> -NU-1000 Isomers At the M06-L, M06, and M06-2X Density Functionals.                                                                             | <b>Page S21</b>  |
| <b>Table S2.</b> Effects of Geometric Relaxation on the Computed Relative Enthalpies (Free Energies in Parenthesis) Between Selected Al <sub>8</sub> -NU-1000 Isomers At the M06-L, M06, and M06-2X Density Functionals.                          | <b>Page S22</b>  |
| <b>Table S3.</b> XYZ Cartesian Coordinates of all optimized structures on the Al <sub>8</sub> -NU-1000 support.                                                                                                                                   | <b>Page S24</b>  |
| <b>Table S4.</b> XYZ Cartesian Coordinates of All Optimized Structures on the NU-1000 Support.                                                                                                                                                    | <b>Page S84</b>  |
| <b>Table S5.</b> XYZ Cartesian Coordinates of All Optimized Structures on the UiO-66 Site-1 Support.                                                                                                                                              | <b>Page S114</b> |
| <b>Table S6.</b> XYZ Cartesian Coordinates of Selected Optimized Al <sub>8</sub> -NU-1000 Isomers at the M06-L Density Functional.                                                                                                                | <b>Page S147</b> |
| <b>Table S7.</b> XYZ Cartesian Coordinates of Selected Optimized Al <sub>8</sub> -NU-1000 Isomers at the M06 Density Functional.                                                                                                                  | <b>Page S164</b> |
| <b>Table S8.</b> XYZ Cartesian Coordinates of Selected Optimized Al <sub>8</sub> -NU-1000 Isomers at the M06-2X Density Functional.                                                                                                               | <b>Page S182</b> |
| <b>References</b>                                                                                                                                                                                                                                 | <b>Page S198</b> |

## Section 1. Experimental Results

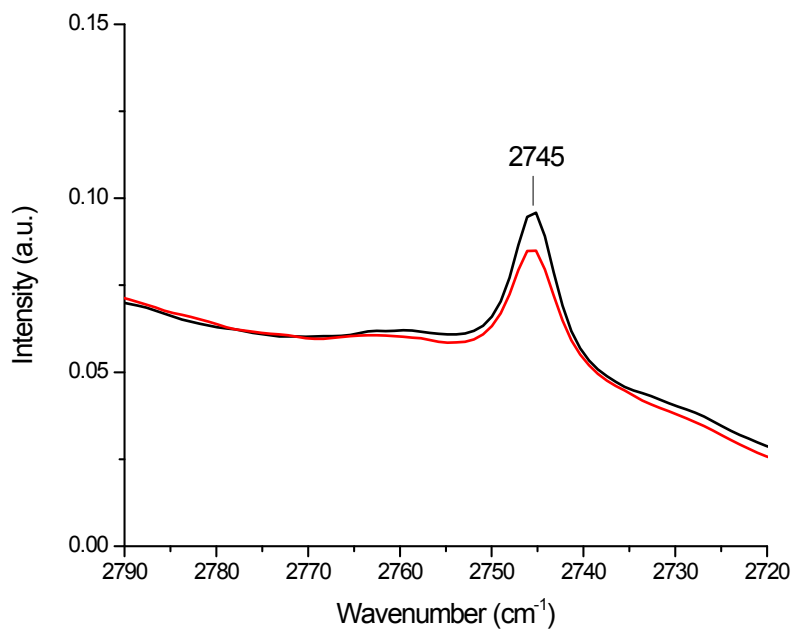

**Figure S1.** IR Spectra in the H Bonded H<sub>2</sub>O/OH Region Characterizing of Bare Al-NU-1000 (Black) And the Samples Formed by Adsorption of Ir(C<sub>2</sub>H<sub>4</sub>)<sub>2</sub>(acac) on Them (Red).

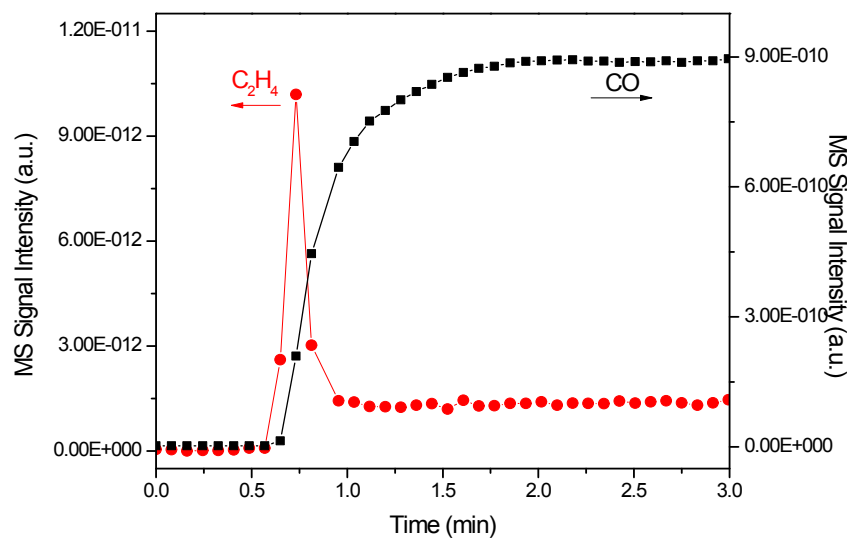

**Figure S2.** Mass Spectra Charactering the Effluent Gas after the NU-1000 Supported  $Ir(C_2H_4)_2$  Complex Had Been Treated in 10% CO/He for 3 Min. The Data Indicate the Replacing of  $C_2H_4$  Ligands on Iridium by CO.

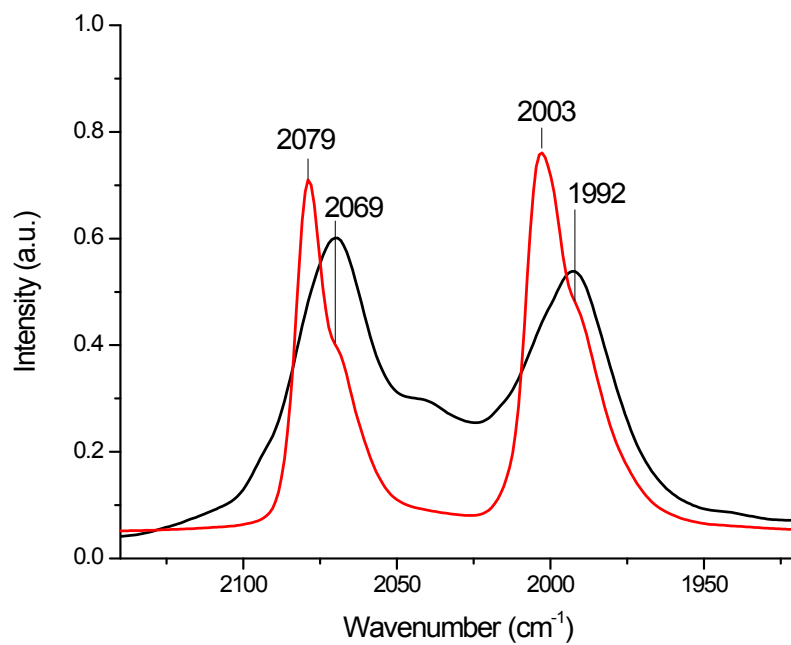

**Figure S3.** IR spectra in the  $\nu_{CO}$  Region Characterizing Ir(C<sub>2</sub>H<sub>4</sub>)<sub>2</sub> Supported on NU-1000 (Black) And on Al-NU-1000 (Red) After Contact with a Pulse of CO in Helium At 298 K And 1 Bar for 3 Min.

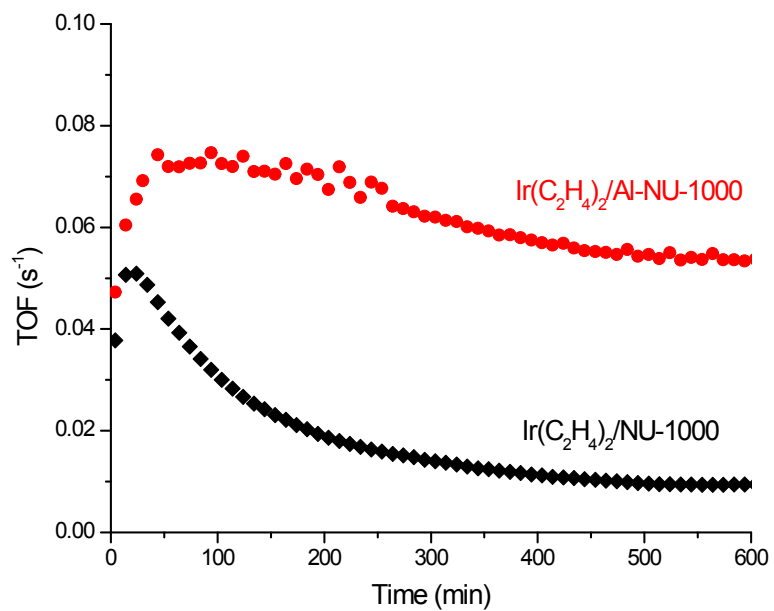

**Figure S4.** Long-term Activities During Ethylene Hydrogenation.

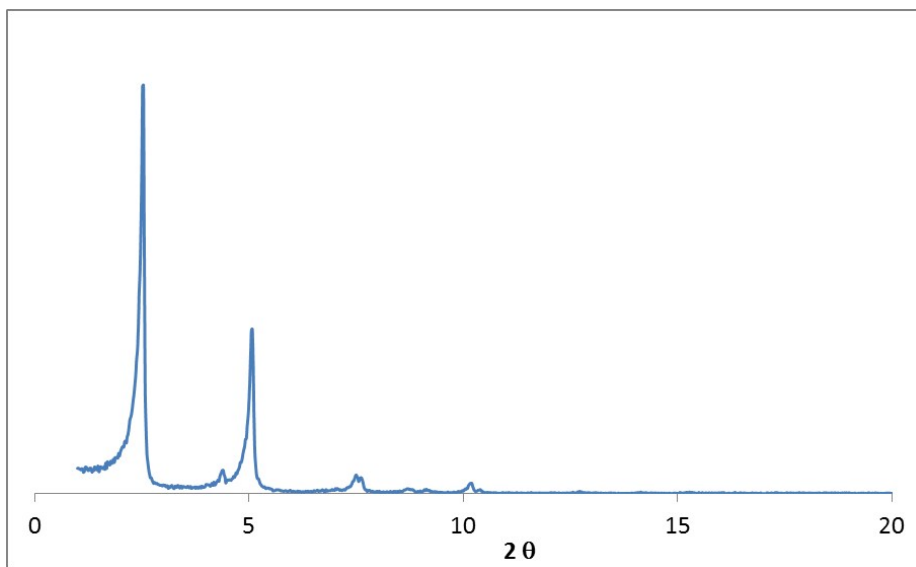

**Figure S5.** PXRD pattern of Ir(CO)<sub>2</sub>@Al-NU-1000.

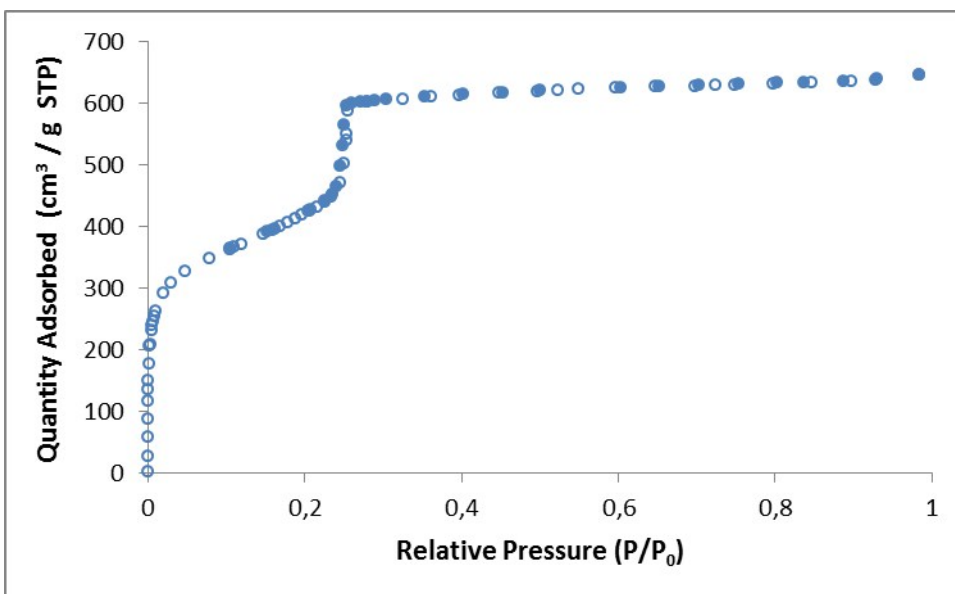

**Figure S6.** Adsorption (open circles) and desorption (solid circles) branches of the nitrogen physisorption isotherm of Al-NU-1000. Isotherms were collected on a Micromeritics TriStar II at 77 K. Before measurement, the sample was activated on a Micromeritics Smart VacPrep at 120 °C for 12 h.

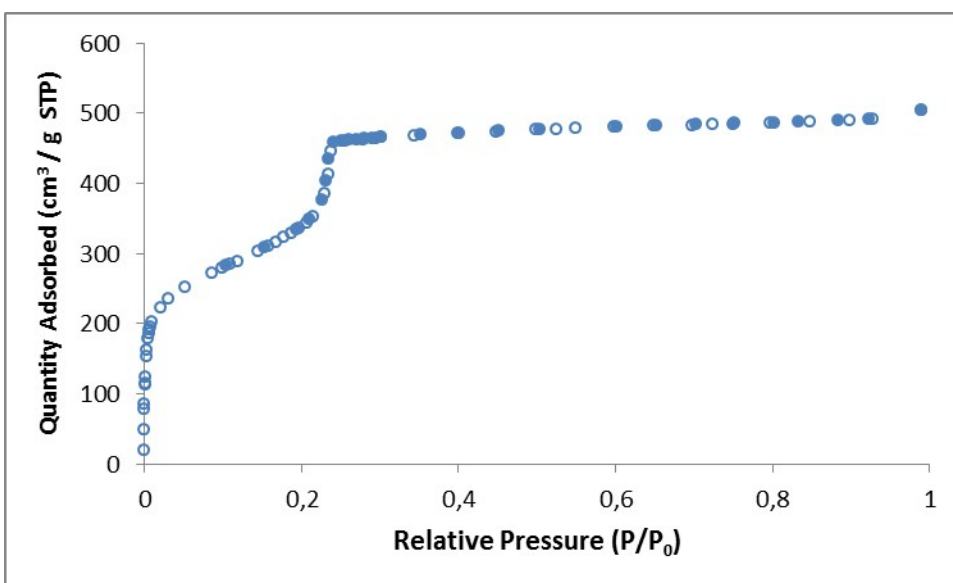

**Figure S7.** Adsorption (open circles) and desorption (solid circles) branches of the nitrogen physisorption isotherm of Ir(CO)<sub>2</sub>@Al-NU-1000. Isotherms were collected on a Micromeritics TriStar II at 77 K. Before measurement, the sample was activated on a Micromeritics Smart VacPrep at 120 °C for 12 h.

## Section 2. Computational Results

### Section 2.1. Searching for Energetically Viable Ir@Al-NU-1000 Complexes

#### 2.1.1. Dehydrated Al-NU-1000 Complexes

We have previously shown that NU-1000 metal organic framework (MOF) nodes can be coated with Aluminum atoms by starting from two equivalents of  $\text{Al}(\text{CH}_3)_3$  precursors and releasing four equivalents of methane as byproduct (Scheme S1).<sup>[1]</sup> The overall process has been shown to be highly exothermic with a computed change in enthalpy of -128.8 kcal/mol.

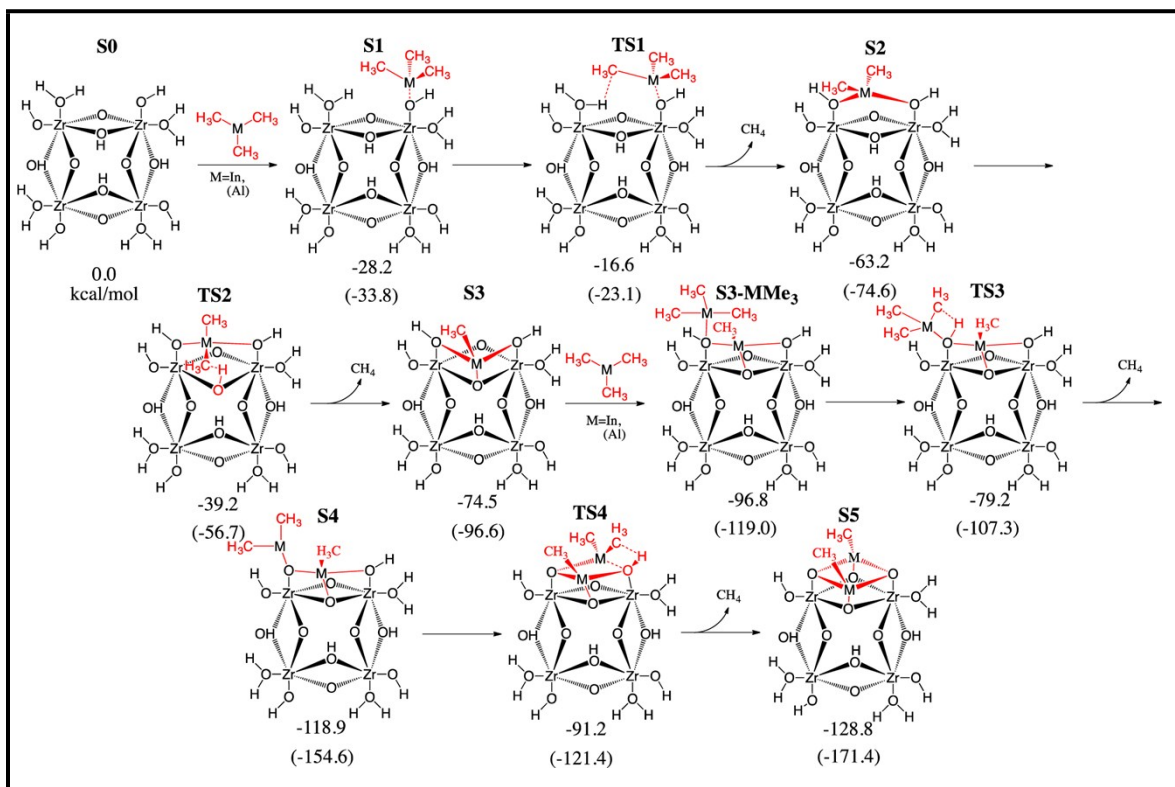

**Scheme S1.** M06-L Computed Relative Enthalpies (in kcal/mol) for Decorating NU-1000 with Al and In (in Parenthesis) Atoms.

Hydrolyzing Al decorated NU-1000 (Al-NU-1000) nodes leads to the formation of the hydroxylated Al-NU-1000 in which the methyl groups on the Al atoms are replaced with hydroxyl. These OH groups can subsequently provide ideal binding sites for transition metal catalysts such as Iridium (I) complexes to bind. To keep the neutrality of the overall system, we remove one proton after deposition of the Ir(I) complexes (For different dehydrated Ir(I) isomers considered in this work see Scheme S2).



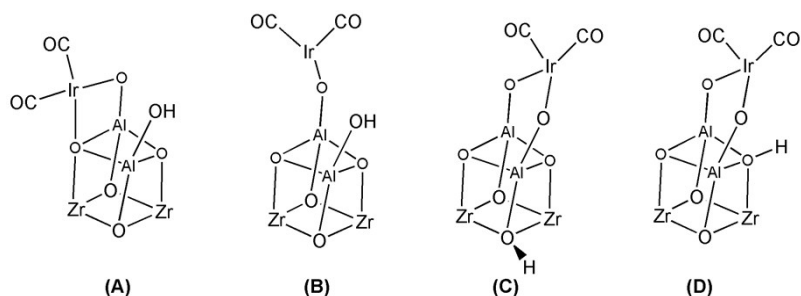

**Scheme S2.** Four Different Dehydrated Ir@Al-NU-1000 Isomers Initially Considered in This Work.

Optimized structures of the (A)-(D) as well as their relative energies and scaled frequencies (scaling factor = 0.956) are shown in Figure S5 below.

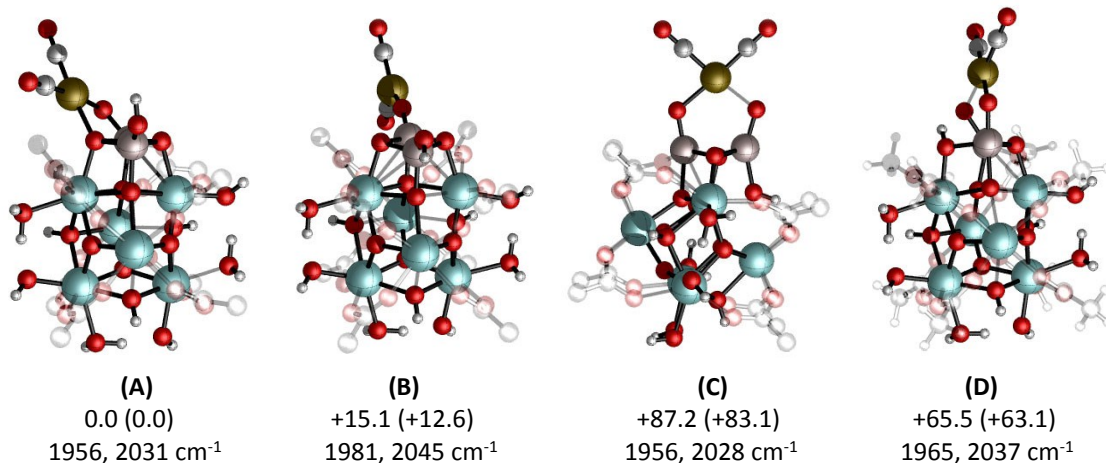

**Figure S8.** Optimized Structures of Different Dehydrated Ir@Al-NU-1000 Isomers Considered in This Work. The Relative Stabilities,  $\Delta H$  ( $\Delta G$  in Parenthesis) Are Given in kcal/mol. All Frequencies (in  $\text{cm}^{-1}$ ) Are Scaled by 0.956. Color Code: Carbon: Gray, Oxygen: Red, Hydrogen: White, Aluminum: AntiqueWhite, Zirconium: Cyan, Iridium: Citron.

As can be seen from Figure S8, none of the dehydrated isomers yield frequencies close to the experimentally obtained values for the  $\text{Ir}(\text{CO})_2@Al\text{-NU-1000}$ . In the next section we turn our focus on different hydrated isomers of these systems.

## 2. Saturated Ir@Al-NU-1000 with Hydroxo/Aqua Groups

As mentioned above, the computed scaled carbonyl frequencies of both (A) and (B) isomers are far lower than the experimentally observed ones (i.e., 2003 and 2079  $\text{cm}^{-1}$ ). It has been shown before that saturation of Al clusters with hydroxyl/aqua groups can lead to more Lewis acidic Al sites/more Lewis basic oxygen atoms and ultimately higher carbonyl frequencies.<sup>[2]</sup> Due to the resemblance of the experimental frequencies of the Ir@Al-NU-1000 to the ones previously obtained for Ir@ $\gamma\text{-Al}_2\text{O}_3$ ,<sup>[3]</sup> different  $\text{Al}_n$  clusters ( $n = 2, 4, \text{ and } 8$ ) were cut from the crystal

structure of the  $\gamma$ -Al<sub>2</sub>O<sub>3</sub> and saturated with OH/OH<sub>2</sub> groups.<sup>[4]</sup> The optimized structures of these clusters are given below.

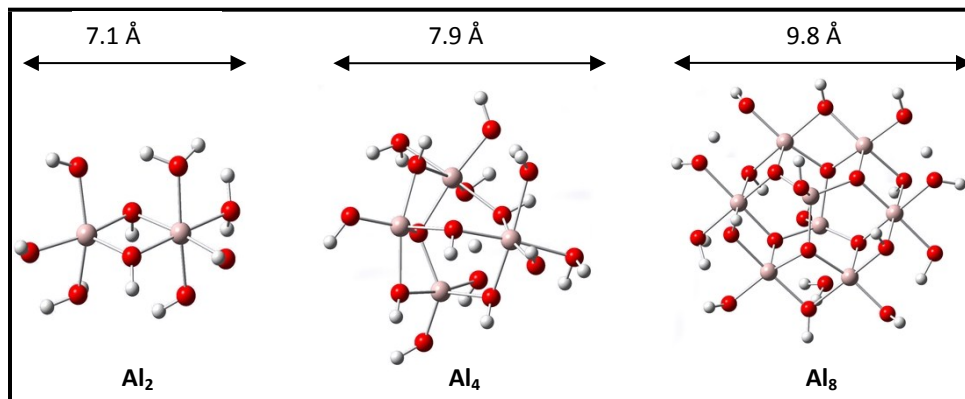

Following are all possible isomers on each Al cluster both with and without the NU-1000 node. Relative enthalpies (free energies) in kcal/mol as well as scaled carbonyl frequencies (scaling factor = 0.956) are also given for each optimized structure. For these calculations, the pyrene linkers were truncated to benzoates instead of acetates, on the upper side of the node, to capture all possible electrostatic interactions between Al clusters and linkers.

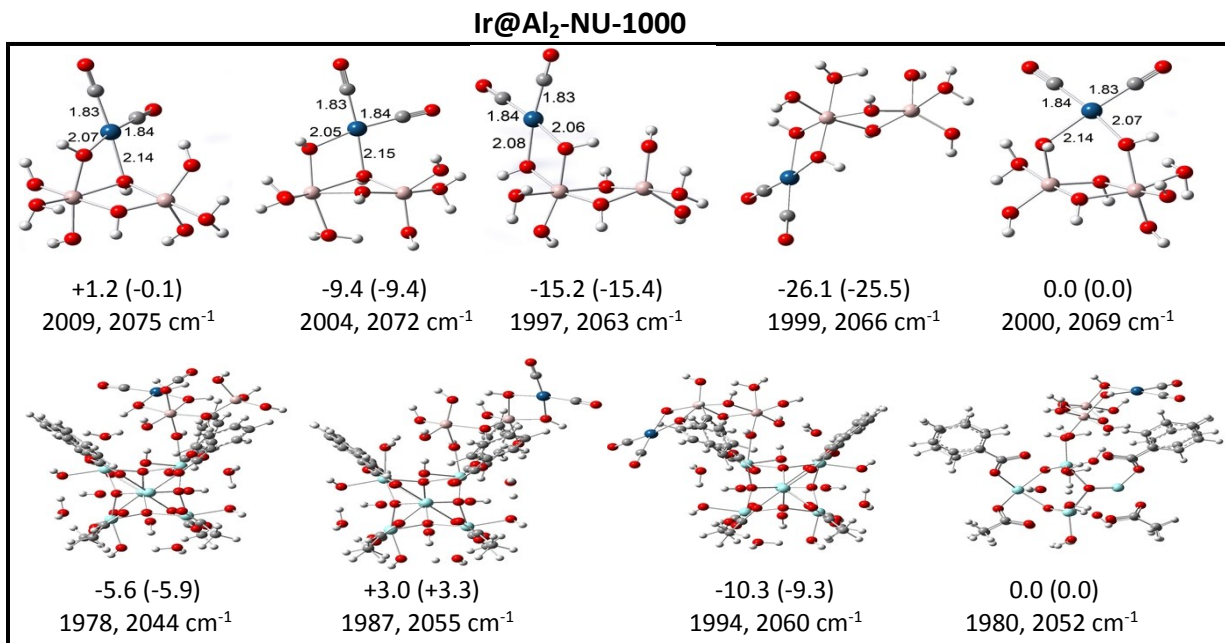

**Ir@Al<sub>4</sub>-NU-1000**

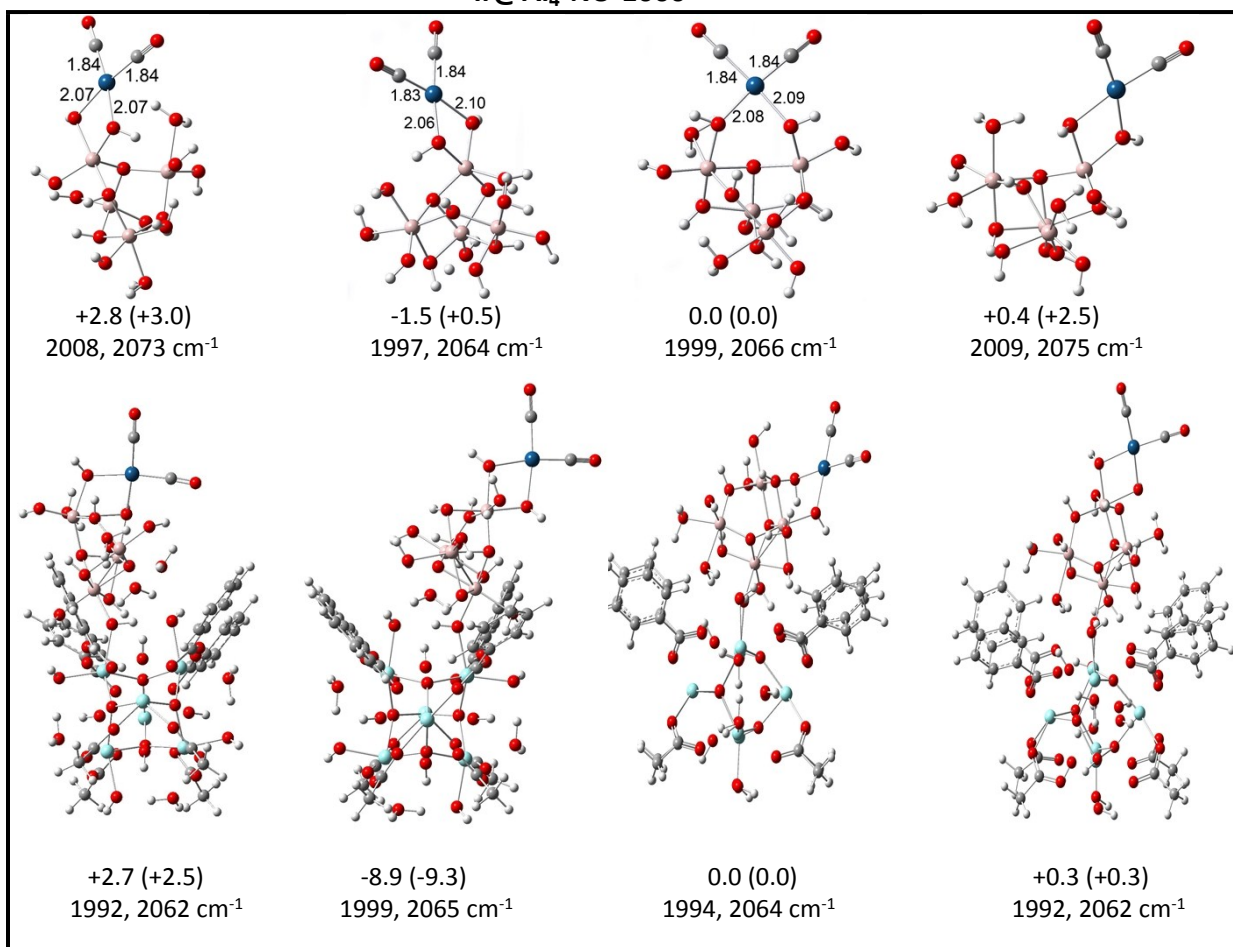

### Ir(CO)<sub>2</sub>@Al<sub>8</sub>-NU-1000

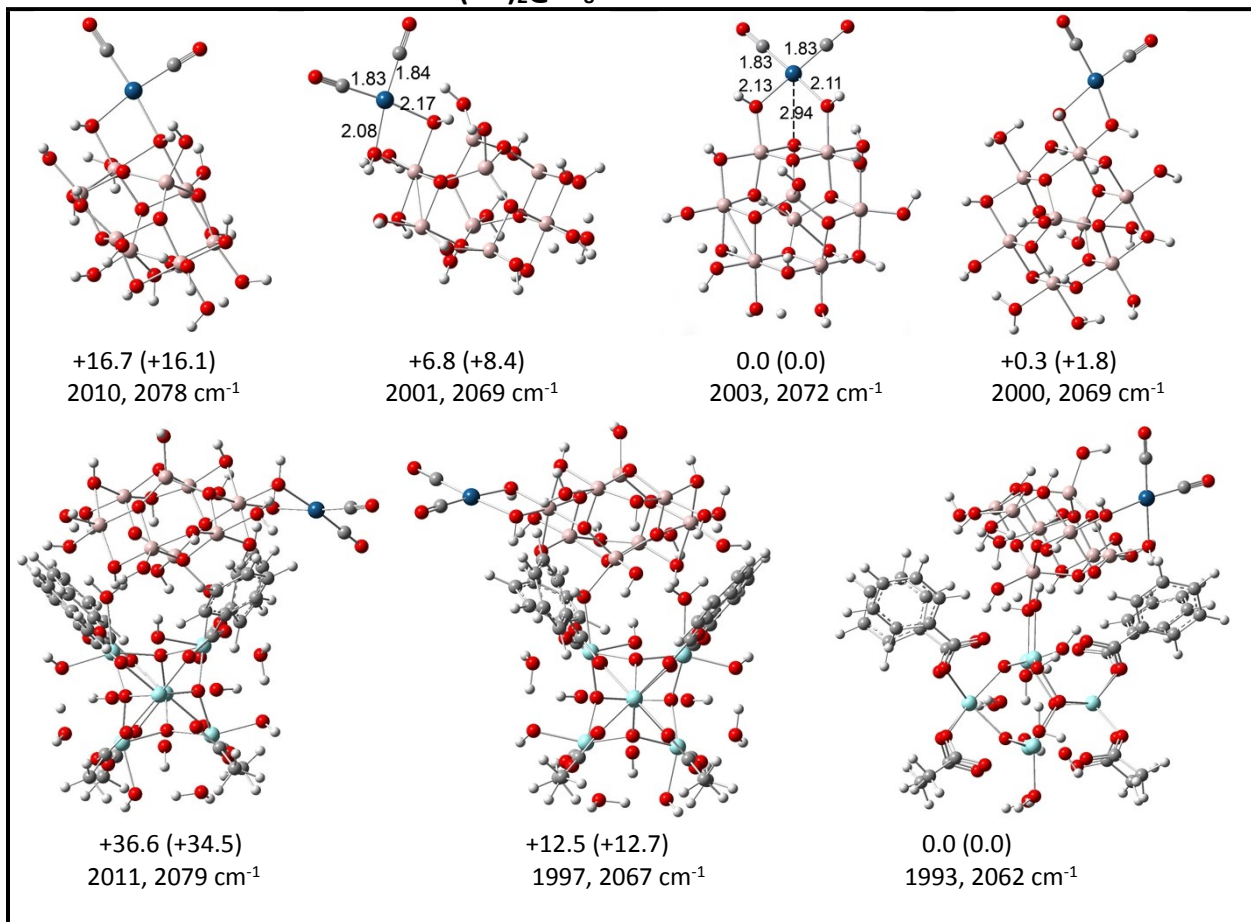

In this search, we are ideally looking for any stable isomer that can reproduce the experimentally observed carbonyl frequencies.

The following points can be drawn from the above computations:

- (i) In agreement with Gates and Dixon,<sup>[5]</sup> the bi-dentated isomer was found to be the most stable isomer for all the studied Al<sub>n</sub> (n = 2, 4, and 8) clusters. All the mono-dentated isomers were converted to their corresponding bi-dentated ones during the optimization process.
- (ii) By comparing these clusters to the previously studied dehydrated ones one can see a blue shift of  $\approx 25$  cm<sup>-1</sup> in CO frequencies.
- (iii) Node substitution changes the relative stabilities between the isomers by up to  $\approx 16$  kcal/mol and the CO frequencies by 5-10 cm<sup>-1</sup>.

Unfortunately, none of the above studied Al<sub>n</sub> systems can fulfill both stability and frequency conditions. For instance, in the Ir(CO)<sub>2</sub>@Al<sub>8</sub>-NU-1000 case one of the isomers has scaled carbonyl frequencies rather close to the experimentally observed ones but it is at the same time 36.6 kcal/mol in enthalpy less stable than the most stable isomer found for these systems.

In the next step, we focus on systematically exploring all possible ways of modulating Al clusters to fulfill both stability and frequency conditions.

To this end, four different classes of Ir@Al<sub>n</sub>-NU-1000 (n = 2, 4, and 8) compounds were considered for further investigations:

(1) Cationic Ir@Al-NU-1000 generated by removing one OH group or addition of one extra proton.

(2) Mixed Al-OH/Zr-OH coordination (i.e. coordinating the Ir(CO)<sub>2</sub> unit to Al-OH and Zr-OH sites simultaneously).

(3) Indirect coordination (i.e. Ir(CO)<sub>2</sub> Coordinates to one face of the NU-1000 node and Al<sub>n</sub> (n = 2, 4, and 8) cluster to the other).

(4) Under coordination (lowering the coordination number of the Al atoms by removing one water molecule).

### (1) Cationic Ir@Al-NU-1000

Three examples of the cationic species for Al<sub>2</sub> cluster on the NU-1000 node are shown below. Relative enthalpies (free energies) in kcal/mol as well as scaled carbonyl frequencies (scaling factor = 0.956) in cm<sup>-1</sup> are also given.

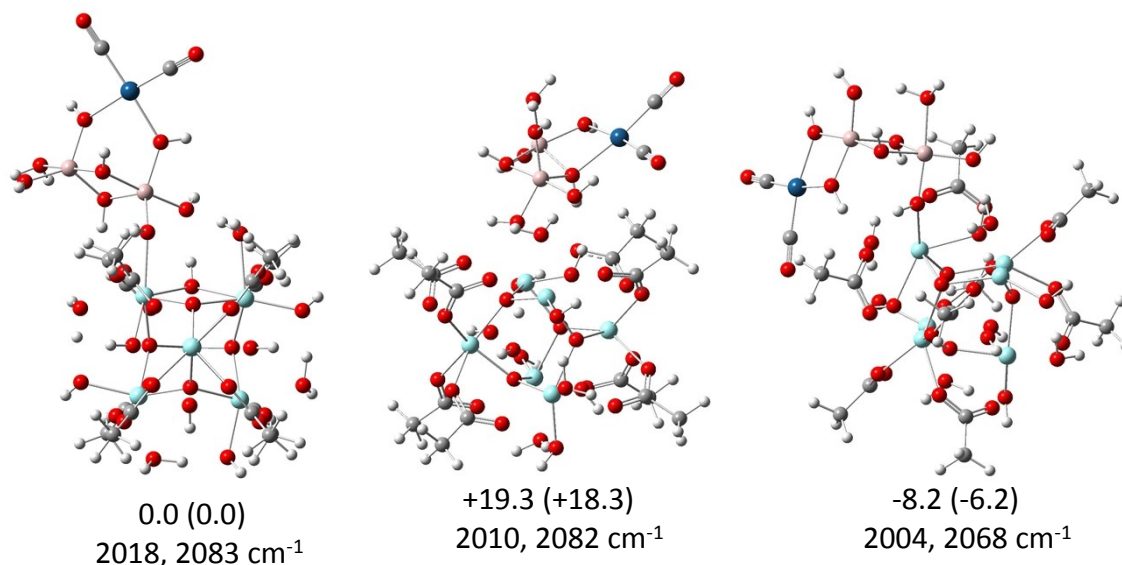

**Figure S9.** Optimized Cationic Ir(CO)<sub>2</sub>@Al<sub>2</sub>-NU-1000 Structures.

## (2) Mixed Al-OH/Zr-OH coordination

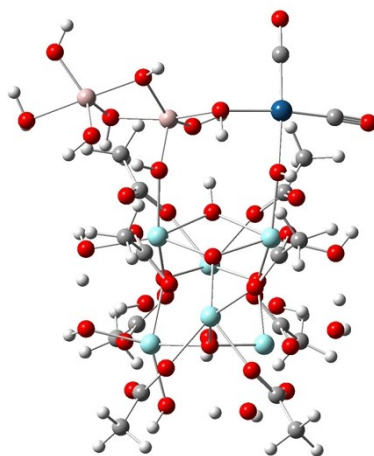

1988, 2055  $\text{cm}^{-1}$

**Figure S10.** Optimized Mixed Al-OH/Zr-OH  $\text{Ir}(\text{CO})_2@Al_2\text{-NU-1000}$  Structure.

Since the frequencies did not change in the right direction, we did not pursue this further for other Al clusters.

## (3) Indirect coordination

### $\text{Ir}(\text{CO})_2@Al_2\text{-NU-1000}$

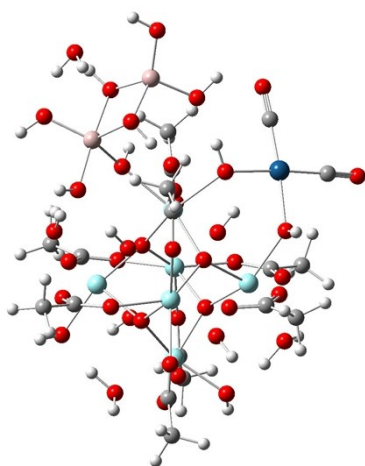

-22.5 (-22.3)  
1985, 2053  $\text{cm}^{-1}$

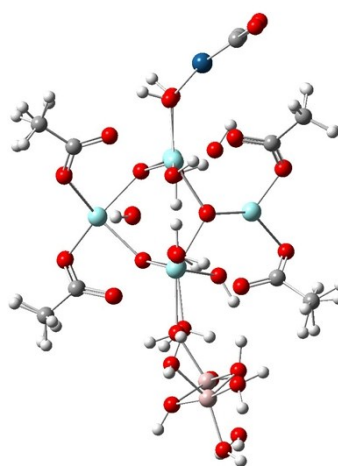

0.0 (0.0)  
1989, 2058  $\text{cm}^{-1}$



**Ir(CO)<sub>2</sub>@Al<sub>4</sub>-NU-1000**

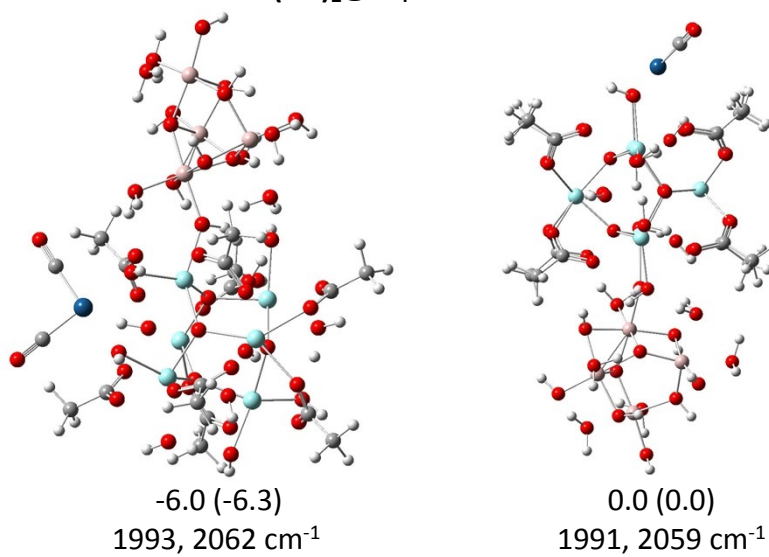

**Ir(CO)<sub>2</sub>@Al<sub>8</sub>-NU-1000**

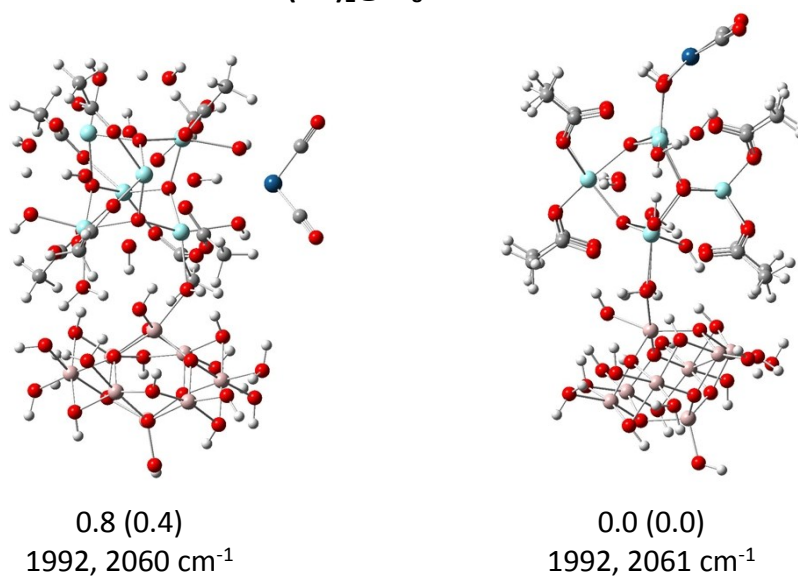

**Figure S11.** Optimized Ir(CO)<sub>2</sub>@Al<sub>n</sub>-NU-1000 (n = 2, 4, and 8) Structures with Indirect Coordination.

#### (4) Under Coordination

#### Ir@Al<sub>2</sub>-NU-1000

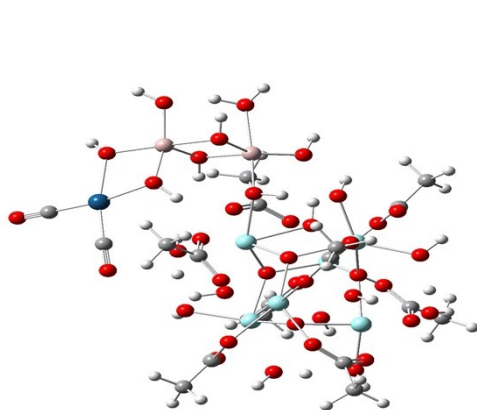

1990, 2057 cm<sup>-1</sup>  
0.0 (0.0)

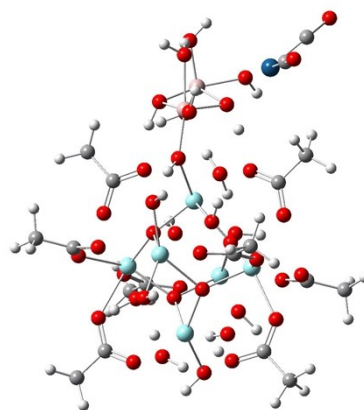

2003, 2070 cm<sup>-1</sup>  
+9.8 (+8.3)

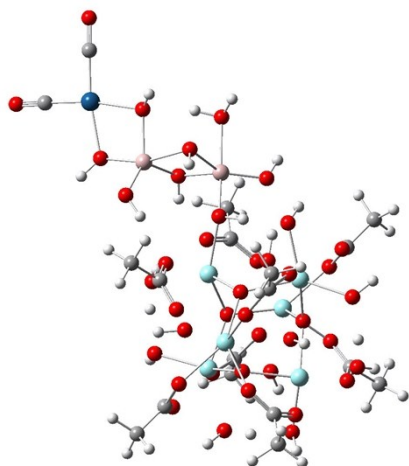

2002, 2067 cm<sup>-1</sup>  
+10.8 (+8.5)

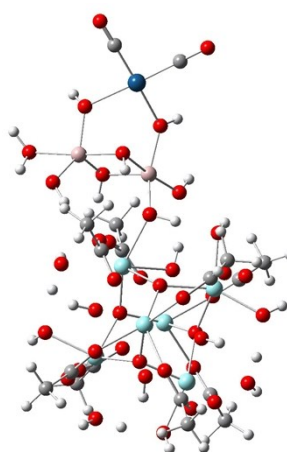

1997, 2066 cm<sup>-1</sup>  
+11.4 (+8.7)



**Ir@Al<sub>4</sub>-NU-1000**

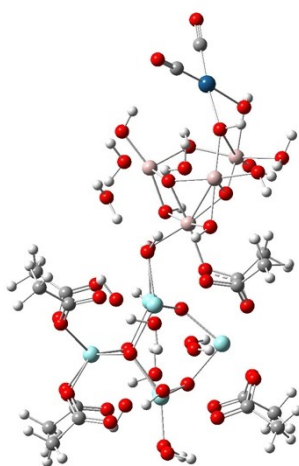

1987, 2053 cm<sup>-1</sup>  
0.0 (0.0)

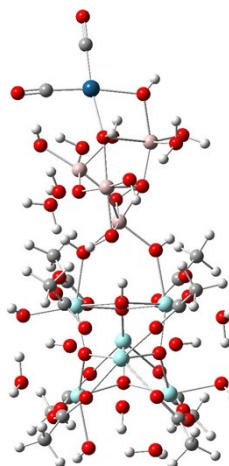

1983, 2051 cm<sup>-1</sup>  
-3.3 (-4.3)

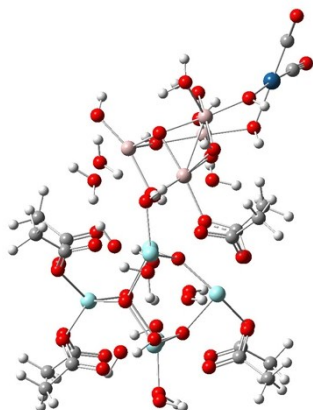

1987, 2056 cm<sup>-1</sup>  
-3.8 (-1.5)

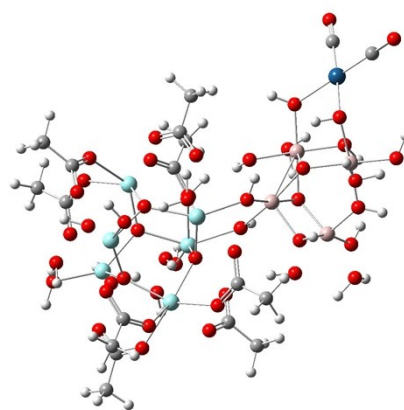

1980, 2051 cm<sup>-1</sup>  
-4.4 (-6.6)

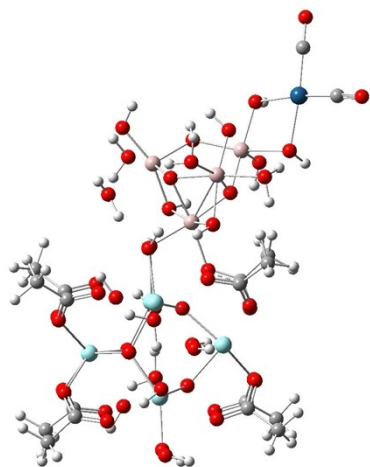

1983, 2051  $\text{cm}^{-1}$   
-1.3 (+0.3)

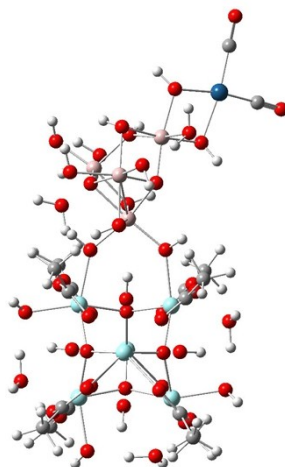

1987, 2054  $\text{cm}^{-1}$   
-14.7 (-15.6)

**Ir@Al<sub>8</sub>-NU-1000**

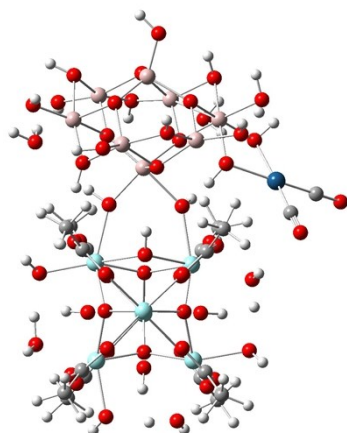

1999, 2066  $\text{cm}^{-1}$   
+25.0 (+23.9)

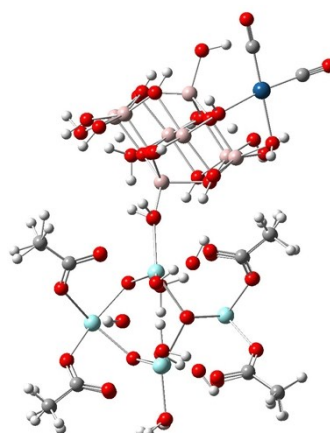

1984, 2052  $\text{cm}^{-1}$   
0.0 (0.0)

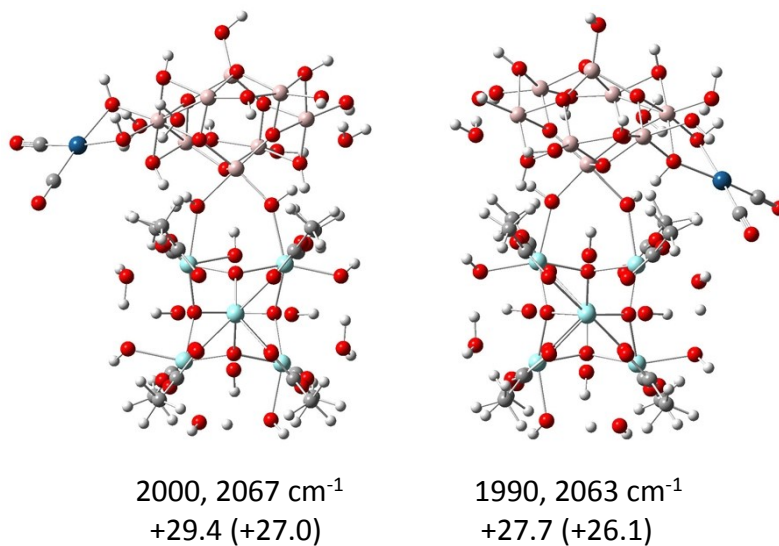

**Figure S12.** Optimized Under Coordinated  $\text{Ir}(\text{CO})_2@Al_n\text{-NU-1000}$  ( $n = 2, 4, \text{ and } 8$ ) Structures.

Considering both relative energies between different isomers and closeness of the computed carbonyl stretching frequencies to the experimentally obtained ones, as well as EXAFS data reported in our previous work,<sup>[6]</sup> the  $\text{Ir}(\text{CO})_2@Al_8\text{-NU-1000}$  cluster isomers (specifically  **$Al_8\text{-NU-1000}$  (opposite)** isomer in Figure S13 below) were selected for further investigations.

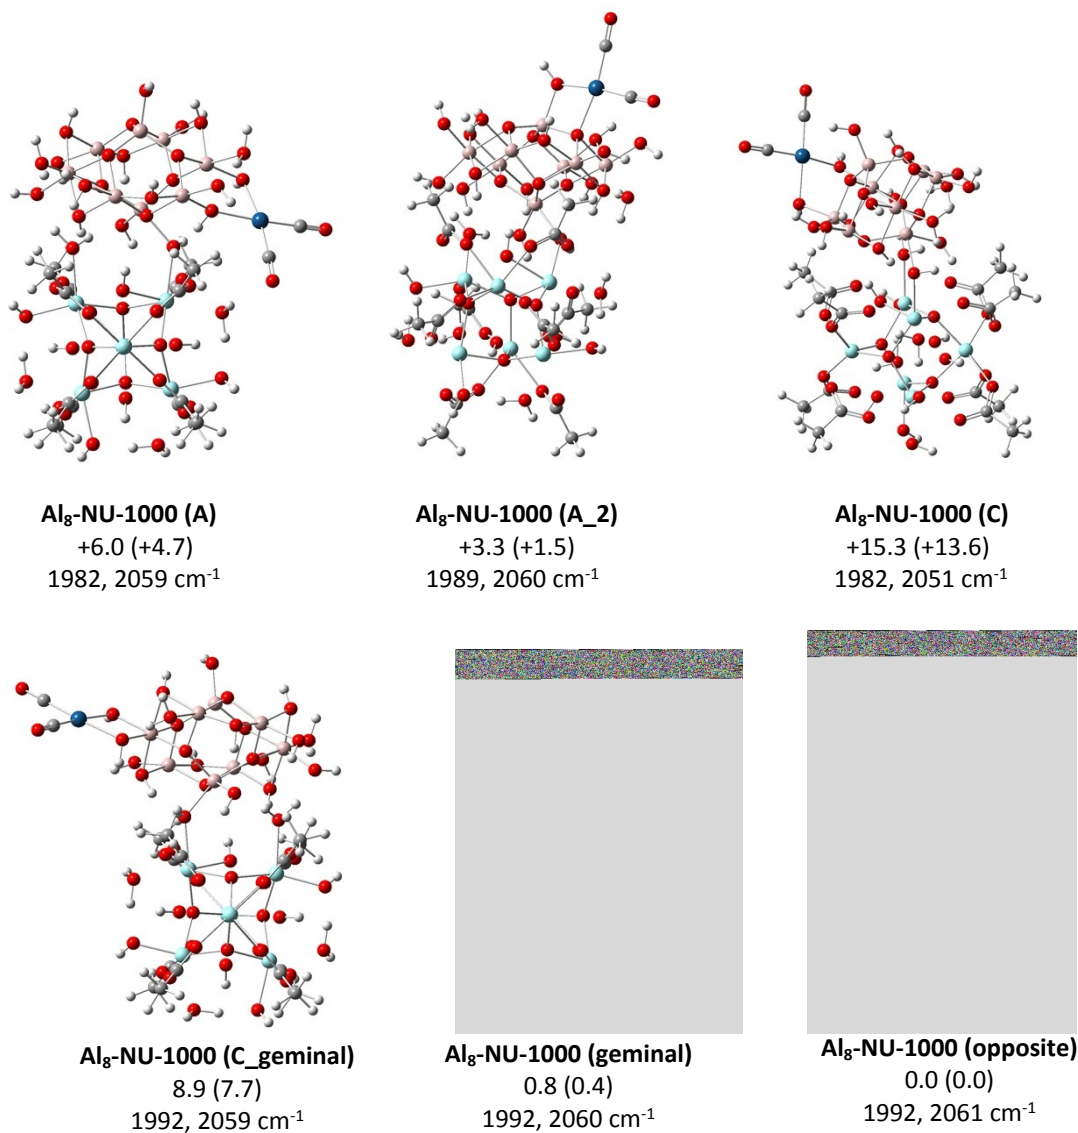

**Figure S13.** Optimized selected  $\text{Ir}(\text{CO})_2@Al_8\text{-NU-1000}$  isomers at the M06-L density functional. Relative enthalpies (free energies in parenthesis) in kcal/mol as well as scaled (0.956) carbonyl stretching frequencies (in  $\text{cm}^{-1}$ ) are also given.

Also, New computations were performed in order to test the performance of other commonly used density functionals, the results of which are presented in Tables S1 and S2 of the supplementary information (SI). To summarize, the computed trend for relative stabilities between different isomers remain relatively constant for most of the studied  $\text{Ir}(\text{CO})_2@Al_8\text{-NU-1000}$  species except for the **Al<sub>8</sub>-NU-1000 (C)** isomer (Figure S13, SI). Although our M06 and M06-2X computed enthalpies (free energies) show that this isomer is 4.4 (5.9) kcal/mol and 3.8 (4.4) kcal/mol more stable than the **Al<sub>8</sub>-NU-1000 (opposite)** one used in our mechanistic studies, however we have shown in our previous study that the latter isomer has the most resemblance to the available experimental EXAFS data and therefore we gave our final verdict to this species.<sup>[6]</sup>

**Table S1.** Computed relative electronic energy differences (kcal/mol) between selected Al<sub>8</sub>-NU-1000 isomers using the M06-L, M06, and M06-2X density functionals at the M06-L optimized geometries. See Figure S13 for the M06-L optimized geometries and Table S6 for all the XYZ Cartesian coordinates.

| Species                                   | M06-L//M06-L | M06//M06-L | M06-2X//M06-L |
|-------------------------------------------|--------------|------------|---------------|
| <b>Al<sub>8</sub>-NU-1000 (A)</b>         | +7.0         | +5.3       | +4.9          |
| <b>Al<sub>8</sub>-NU-1000 (A_2)</b>       | +3.8         | +3.8       | +4.7          |
| <b>Al<sub>8</sub>-NU-1000 (C)</b>         | +16.2        | -1.3       | -1.7          |
| <b>Al<sub>8</sub>-NU-1000 (C_geminal)</b> | +9.0         | +6.7       | +8.4          |
| <b>Al<sub>8</sub>-NU-1000 (geminal)</b>   | +0.8         | +0.8       | +0.6          |
| <b>Al<sub>8</sub>-NU-1000 (opposite)</b>  | 0.0          | 0.0        | 0.0           |

**Table S2.** Effects of geometric relaxation on the computed relative enthalpies (free energies in parenthesis) (kcal/mol) between selected Al<sub>8</sub>-NU-1000 isomers using the M06-L, M06, and M06-2X density functionals at the M06-L optimized geometries. See Figure S13 for the M06-L optimized geometries and Tables S6-S8 for all the XYZ Cartesian coordinates.

| Species                                   | M06-L//M06-L  | M06//M06    | M06-2X//M06-2X |
|-------------------------------------------|---------------|-------------|----------------|
| <b>Al<sub>8</sub>-NU-1000 (A)</b>         | +6.0 (+4.7)   | +4.3 (+2.7) | +2.8 (+2.8)    |
| <b>Al<sub>8</sub>-NU-1000 (A_2)</b>       | +3.3 (+1.5)   | +2.7 (+1.4) | +4.2 (+3.2)    |
| <b>Al<sub>8</sub>-NU-1000 (C)</b>         | +15.3 (+13.6) | -4.4 (-5.9) | -3.8 (-4.4)    |
| <b>Al<sub>8</sub>-NU-1000 (C_geminal)</b> | +8.9 (+7.7)   | +6.5 (+5.1) | +7.9 (+7.6)    |
| <b>Al<sub>8</sub>-NU-1000 (geminal)</b>   | +0.8 (+0.4)   | +0.4 (-0.4) | +0.5 (+0.7)    |
| <b>Al<sub>8</sub>-NU-1000 (opposite)</b>  | 0.0 (0.0)     | 0.0 (0.0)   | 0.0 (0.0)      |

The catalytic ethylene hydrogenation pathways starting from  $\text{Ir}(\text{C}_2\text{H}_4)_2\text{H}_2$  on different supports ( $\text{Al}_8\text{-NU-1000}$ ,  $\text{NU-1000}$  and  $\text{UiO-66}$  site-1) are given in the text (Figure 3). Also, the energetically preferred dimerization pathway is illustrated inside the text (Figure 4). Another commonly proposed pathway for ethylene dimerization reaction was also studied and is illustrated in Figure S13 below.

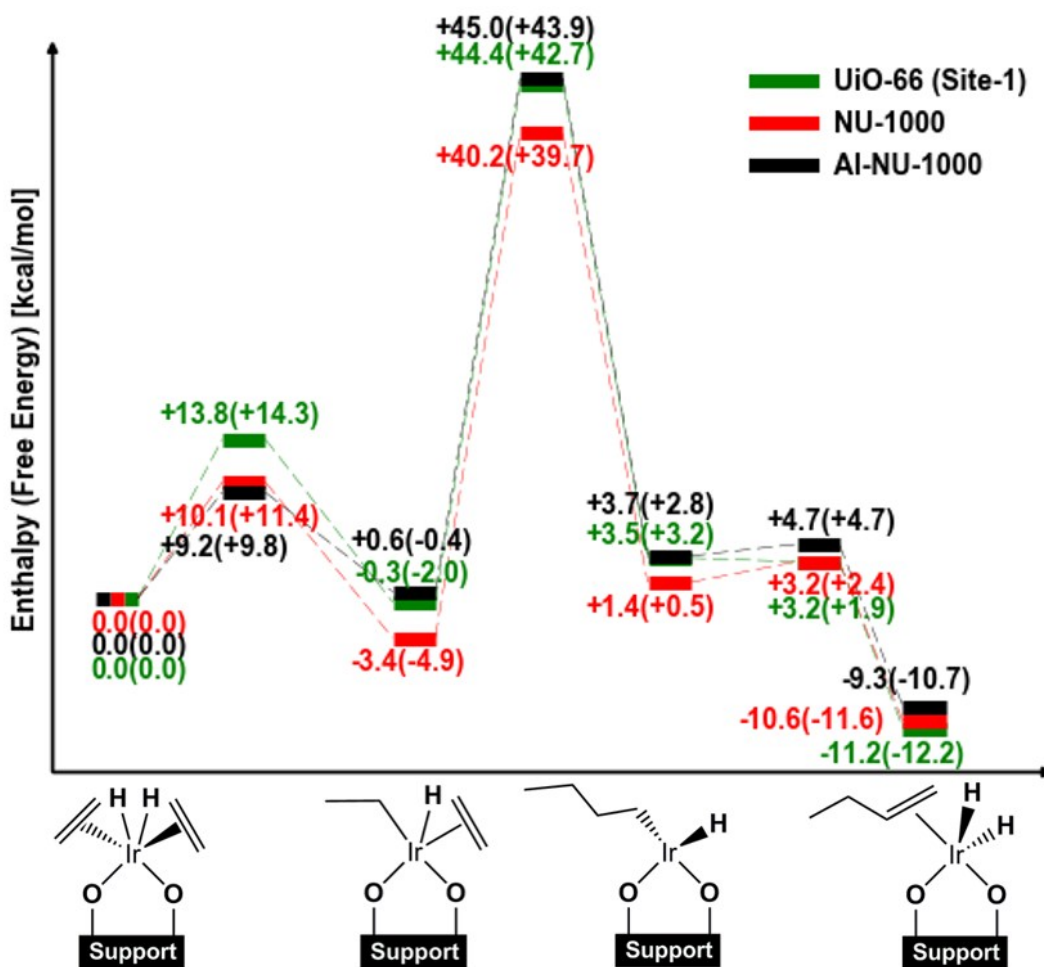

**Figure S14.** Computed Mechanistic Pathway for Ethylene Dimerization on Different Supports. For Clarity, Only Intermediate Species Are Shown.

However, by comparing this pathway to the one presented in Figure 4 one can see that this pathway is not energetically favorable.

**Table S3.** XYZ Cartesian coordinates of all optimized structures on the Al<sub>8</sub>-NU-1000 support (all energies are in Hartree).

**Isolated Al<sub>8</sub> Cluster**

Electronic Energy: -3682.6664063

Enthalpy: -3682.277034

Free Energy: -3682.377202

|    |             |             |             |
|----|-------------|-------------|-------------|
| Al | 1.09891400  | -2.34410300 | 0.83683000  |
| Al | 2.58003100  | -0.14876000 | 0.47510400  |
| Al | 0.03320800  | -0.62715800 | -1.66534000 |
| Al | -0.31361400 | 0.35747500  | 1.67917700  |
| Al | 1.47670900  | 2.11290500  | -0.35812200 |
| Al | -1.67896900 | -2.24038700 | 0.58971800  |
| Al | -1.24057500 | 2.16836700  | -0.84132100 |
| Al | -2.77028100 | 0.06230200  | -0.27342600 |
| H  | 2.55959000  | 0.55382900  | -1.84274100 |
| H  | -0.01470900 | -3.14896300 | -1.66367300 |
| H  | -0.74510100 | 1.52549900  | 3.68309500  |
| H  | -3.68529400 | -3.49293700 | 0.81881200  |
| H  | -0.43115800 | -2.61482200 | -3.07920900 |
| H  | -0.22801300 | 0.42617100  | -3.75742600 |
| H  | -0.07132800 | 4.13952000  | 0.16908800  |
| H  | 2.58457300  | 3.91113900  | 0.78078800  |
| H  | -2.83502200 | -0.52823300 | 2.08279900  |
| H  | -3.87558200 | -1.25307600 | -2.02410300 |
| H  | -1.95720600 | 0.53124900  | -2.52566900 |
| H  | -3.87708200 | -2.04311800 | -0.69107100 |
| H  | -2.95562100 | 3.78346800  | -1.37715300 |
| H  | -3.67390700 | 2.27029500  | -0.07340000 |
| H  | -4.91141500 | 1.33916400  | -0.44755500 |
| H  | 4.79439500  | 0.89696700  | 0.95262600  |
| H  | 1.96710600  | -0.85641200 | 2.69113200  |
| H  | -0.29197200 | -4.41794700 | 0.20485800  |
| H  | 3.55146500  | -2.34799200 | 0.19517500  |
| H  | 3.61724600  | 1.94679700  | 1.03300700  |
| H  | 2.85107900  | -3.84086400 | 1.44214200  |
| H  | 4.04807600  | -1.49668200 | -1.00822000 |
| O  | 1.37095300  | -1.18261900 | -0.53248400 |
| O  | 2.86936200  | 0.96825500  | -1.03107100 |
| O  | -0.27719600 | -3.45835200 | 0.18479700  |
| O  | -0.64659800 | 0.62900100  | 3.36017100  |
| O  | -0.34334200 | -1.47469900 | 1.59780200  |
| O  | 1.25348000  | 1.00335600  | 1.07947400  |
| O  | 0.26658400  | -2.58595700 | -2.41132400 |
| O  | -3.01739400 | -3.35125600 | 0.14207100  |
| O  | -0.51446700 | -0.40449300 | -3.36962200 |
| O  | 2.82218500  | 3.14656400  | 0.25124600  |
| O  | -1.49379000 | -1.17111500 | -0.84555600 |
| O  | 0.25031800  | 1.24025500  | -1.45266900 |



|   |             |             |             |
|---|-------------|-------------|-------------|
| O | 0.11070100  | 3.36750200  | -0.37040000 |
| O | -1.54198300 | 1.12906100  | 0.61496900  |
| O | -2.99773900 | -1.01568100 | 1.26406300  |
| O | -4.13281300 | -1.15471200 | -1.09682500 |
| O | -2.43901300 | 1.07111400  | -1.85929300 |
| O | -2.58850100 | 3.36262200  | -0.59557500 |
| O | -4.14685300 | 1.38478900  | 0.13839300  |
| O | 2.31428900  | -1.31976900 | 1.91911900  |
| O | 3.91355900  | 1.01453400  | 1.32878600  |
| O | 2.42394600  | -3.55038600 | 0.63128400  |
| O | 3.99196700  | -1.46440300 | -0.04452100 |

### Al<sub>8</sub>-NU-1000

Electronic Energy: -6929.6493612

Enthalpy: -6928.656483

Free Energy: -6928.858478

|   |             |             |             |
|---|-------------|-------------|-------------|
| C | 1.68441900  | 3.94341500  | -3.15514000 |
| C | 0.64899900  | -4.90821600 | 2.22466600  |
| C | 2.37165700  | 3.70494900  | 2.55374400  |
| C | 0.00185000  | -4.64437900 | -3.17737000 |
| C | -5.46152400 | -3.56982100 | 3.03745400  |
| C | -4.20580600 | 5.17837100  | -2.39073300 |
| C | -6.09808400 | -3.34300700 | -2.42691100 |
| C | -3.54711000 | 4.91457400  | 3.31258500  |
| C | 1.27407100  | 2.82442300  | 2.03809500  |
| C | 0.75416700  | 3.00364000  | -2.46953500 |
| C | -3.54118900 | 3.93046700  | -1.89896000 |
| C | -5.03722900 | -2.44266000 | -1.88258700 |
| C | -4.54348500 | -2.62142800 | 2.33674300  |
| C | -0.02842400 | -3.67128600 | 1.74594600  |
| C | -3.03318900 | 3.71325000  | 2.58679300  |
| C | -0.52889700 | -3.45027300 | -2.44888800 |
| H | -1.86868900 | -1.86908400 | 2.79187800  |
| H | 1.53845400  | 1.33905300  | -0.23499500 |
| H | -3.66816000 | 1.60518700  | -3.98640400 |
| H | -2.58982200 | 0.44534800  | -3.97562800 |
| H | -2.87040300 | 0.98983400  | 4.58079400  |
| H | -5.71385300 | 0.96229800  | 0.78433400  |
| H | -6.40247000 | 0.51830500  | -1.22815700 |
| H | -5.94858500 | 0.06940900  | 2.06977300  |
| H | -2.57179600 | -1.62584300 | -2.85734900 |
| H | -4.18309100 | 2.64829400  | 0.39248100  |
| H | -0.51896300 | 0.67194100  | -4.55440500 |
| H | -1.03053800 | -0.03613600 | 3.98737600  |
| H | 0.43602100  | 0.55786600  | 4.00816800  |
| H | 2.30105200  | -1.61267000 | 1.87192600  |
| O | -1.74745800 | 1.25857000  | -1.39252400 |
| O | -2.56908000 | 4.06745000  | -1.09703400 |
| O | -2.21123100 | 3.90981600  | 1.64630900  |
| O | 0.11535500  | 3.45844900  | -1.47228600 |

|    |             |             |              |
|----|-------------|-------------|--------------|
| O  | 0.64146800  | 1.82714900  | -2.90513400  |
| O  | 1.81864000  | -0.51670600 | -2.43732600  |
| O  | -0.05548800 | -2.32828200 | -2.75792700  |
| O  | 0.55145400  | -2.56826100 | 1.99555900   |
| O  | -1.42015200 | -3.63713700 | -1.56319000  |
| O  | -1.11156400 | -3.77347300 | 1.11261300   |
| O  | -4.12228800 | -3.00135600 | -1.20844600  |
| O  | -3.76519800 | -3.12667800 | 1.47663300   |
| O  | -4.57248700 | -1.39586100 | 2.64411800   |
| O  | -5.10493400 | -1.20182600 | -2.10761500  |
| O  | -3.44108900 | -0.57154600 | 0.19290000   |
| O  | -2.38732000 | -1.10201100 | -2.07109400  |
| O  | -1.03807600 | 0.04920300  | -4.03293400  |
| O  | -3.55406000 | 0.67481800  | -3.74731900  |
| O  | -0.06241700 | -0.23641700 | 3.76520900   |
| O  | -0.57770500 | -1.22671500 | -0.23773200  |
| O  | 0.64060200  | 0.96664100  | -0.25711400  |
| O  | 1.23325200  | 1.62043200  | 2.40384300   |
| O  | 2.25212700  | -0.69566500 | 1.55746800   |
| O  | 0.46681700  | 3.35157100  | 1.21653100   |
| O  | -5.72230500 | 1.06954100  | -0.82559700  |
| O  | -5.51698400 | 0.88477400  | 1.77769900   |
| O  | -3.52001400 | 1.95582000  | 0.31122400   |
| O  | -4.00141900 | 2.81575800  | -2.27315000  |
| O  | -3.47303900 | 2.57651700  | 2.92876300   |
| O  | -2.63794200 | 0.24564900  | 4.01451600   |
| O  | -1.83742300 | -1.29113600 | 2.02283200   |
| O  | -1.38018800 | 1.13824600  | 1.45960100   |
| Zr | -2.35756800 | -2.31878000 | -0.05085100  |
| Zr | -0.33744900 | -0.12300000 | -2.08238600  |
| Zr | -3.79387100 | 0.60143500  | -1.47192100  |
| Zr | -3.26983300 | 0.47247100  | 2.04340900   |
| Zr | -1.27190100 | 2.64930600  | 0.03729400   |
| Zr | 0.12883800  | -0.31372200 | 1.47522400   |
| H  | 2.14016600  | -1.26732000 | -1.82387300  |
| Al | 5.75180900  | -2.03210000 | -1.73829700  |
| Al | 5.04077500  | 0.33263800  | -2.79168100  |
| Al | 3.64729200  | -0.72837900 | 0.15487500   |
| Al | 7.06242500  | 0.31162300  | -0.231222100 |
| Al | 4.68852400  | 2.28473400  | -1.02864700  |
| Al | 6.22937500  | -2.52652200 | 0.89653900   |
| Al | 4.85861500  | 1.74583100  | 1.63340700   |
| Al | 5.85036100  | -0.49280000 | 2.66194400   |
| H  | 2.84782600  | 1.10512800  | -2.20553400  |
| H  | 4.99733000  | -4.16876300 | -0.57124500  |
| H  | 9.11245100  | 1.48235400  | -0.17735000  |
| H  | 6.66505400  | -4.36450000 | 2.39605700   |
| H  | 1.82997500  | -2.44796100 | -0.13682100  |
| H  | 5.66882500  | 3.89577600  | 0.59970300   |
| H  | 4.65856800  | 4.30668500  | -2.40989800  |
| H  | 8.06847200  | -1.13859600 | 1.93596200   |
| H  | 4.31384900  | -1.99772600 | 3.90438000   |
| H  | 5.51168300  | -2.80331000 | 3.32037200   |

|   |             |             |             |
|---|-------------|-------------|-------------|
| H | 5.15407500  | 3.01202700  | 3.80936600  |
| H | 6.24317900  | 1.88290800  | 3.56065700  |
| H | 6.59003000  | 0.21995300  | 4.84654100  |
| H | 7.33041500  | -0.72197700 | -3.03793400 |
| H | 3.71599100  | -2.94264700 | -2.39662600 |
| H | 2.41535300  | -0.52280900 | -3.23176700 |
| H | 5.07192000  | 1.98658900  | -4.64624100 |
| H | 4.26785100  | -2.13392600 | -3.58579300 |
| H | 4.10698600  | -0.43316100 | -4.99051900 |
| O | 4.47672200  | -0.82254200 | -1.46389100 |
| O | 3.64920600  | 1.61558300  | -2.39672000 |
| O | 5.68077300  | -3.49698700 | -0.64292600 |
| O | 8.77073100  | 0.59553300  | -0.29436400 |
| O | 6.94150600  | -1.48373600 | -0.47993500 |
| O | 6.07959000  | 1.20008200  | -1.44625800 |
| O | 2.60882800  | -2.12623700 | -0.60815300 |
| O | 5.91276400  | -3.86463900 | 2.06886700  |
| O | 5.26952300  | 3.62788400  | -2.11529500 |
| O | 4.83504100  | -1.45599700 | 1.30944400  |
| O | 3.76753600  | 1.16705300  | 0.25767500  |
| O | 4.96592500  | 3.23969400  | 0.55887900  |
| O | 6.32219100  | 0.77453400  | 1.33801900  |
| O | 7.28521800  | -1.64698200 | 2.18067300  |
| O | 5.27867200  | -1.98254900 | 3.87290100  |
| O | 4.22618500  | 0.61240500  | 2.93705100  |
| O | 5.74679200  | 2.70412700  | 3.11435800  |
| O | 6.69323300  | 0.50645500  | 3.93595200  |
| O | 6.41891000  | -1.02284700 | -3.13651800 |
| O | 5.73551700  | 1.76379100  | -3.98175600 |
| O | 4.49247700  | -2.92004900 | -2.99368200 |
| O | 3.95604900  | -0.54166100 | -4.04795900 |
| H | 3.39070900  | 0.20612600  | 2.62933000  |
| H | -4.86509800 | -4.24205100 | 3.66846800  |
| H | -6.19039500 | -3.05116500 | 3.66822200  |
| H | -5.97493800 | -4.20753900 | 2.30764900  |
| H | -5.63652300 | -4.17454600 | -2.97324200 |
| H | -6.65183400 | -3.79390000 | -1.59268400 |
| H | -6.79706100 | -2.81051500 | -3.07932800 |
| H | -3.49929200 | 6.01357100  | -2.44038400 |
| H | -4.68999000 | 5.02061900  | -3.36026600 |
| H | -4.99254700 | 5.45487600  | -1.67469400 |
| H | -2.79089500 | 5.70581700  | 3.35197900  |
| H | -4.40609500 | 5.31534500  | 2.75606900  |
| H | -3.89592600 | 4.66078600  | 4.31898500  |
| H | 3.06459900  | 3.93051300  | 1.73022700  |
| H | 1.97272700  | 4.66916600  | 2.89263800  |
| H | 2.91040200  | 3.21830200  | 3.37670300  |
| H | 1.62934900  | -4.99528700 | 1.73612400  |
| H | 0.84909100  | -4.83584000 | 3.30109500  |
| H | 0.06000000  | -5.80607800 | 2.01531700  |
| H | 1.03105300  | -4.83540200 | -2.84193800 |
| H | -0.59839200 | -5.54034000 | -2.99085500 |
| H | 0.05751200  | -4.43788800 | -4.25264300 |

|   |            |            |             |
|---|------------|------------|-------------|
| H | 2.38789900 | 3.41175300 | -3.80216300 |
| H | 1.10040200 | 4.65782300 | -3.75282100 |
| H | 2.22895000 | 4.53604000 | -2.40987400 |
| H | 5.71266800 | 2.56552000 | -3.34848400 |

**Ir(CO)<sub>2</sub>@Al<sub>8</sub>-NU-1000**

Electronic Energy: -7260.0935486

Enthalpy: -7259.083675

Free Energy: -7259.298270

|   |             |             |             |
|---|-------------|-------------|-------------|
| C | 1.68444800  | 3.94340000  | -3.15512100 |
| C | 0.64900500  | -4.90821400 | 2.22466400  |
| C | 2.37166400  | 3.70494700  | 2.55373300  |
| C | 0.00185700  | -4.64437500 | -3.17737100 |
| C | -5.46152300 | -3.56982200 | 3.03745400  |
| C | -4.20580500 | 5.17837200  | -2.39073100 |
| C | -6.09808300 | -3.34300800 | -2.42691100 |
| C | -3.54710600 | 4.91457500  | 3.31258600  |
| C | 1.27405600  | 2.82442600  | 2.03808400  |
| C | 0.75414900  | 3.00362100  | -2.46954200 |
| C | -3.54119800 | 3.93046700  | -1.89895400 |
| C | -5.03723600 | -2.44266000 | -1.88258800 |
| C | -4.54349000 | -2.62143200 | 2.33674400  |
| C | -0.02842600 | -3.67127100 | 1.74594700  |
| C | -3.03319100 | 3.71324400  | 2.58679900  |
| C | -0.52889300 | -3.45025300 | -2.44888900 |
| H | -1.87657000 | -1.87426300 | 2.78452900  |
| H | 1.51229300  | 1.35993900  | -0.23621500 |
| H | -3.67437500 | 1.60341300  | -3.99756800 |
| H | -2.57541300 | 0.45634400  | -3.98240100 |
| H | -2.88929200 | 0.97082400  | 4.59093200  |
| H | -6.38323900 | 0.32828000  | -1.14158300 |
| H | -5.95820400 | 0.13682300  | 2.16421000  |
| H | -2.57681500 | -1.61911500 | -2.86866400 |
| H | -4.09241400 | 2.71168700  | 0.39080000  |
| H | -0.50740700 | 0.65805400  | -4.56833300 |
| H | -1.04998100 | -0.03153600 | 3.98457600  |
| H | 0.42330900  | 0.55156100  | 4.02088500  |
| H | 2.27910000  | -1.61117900 | 1.87865200  |
| O | -1.74636500 | 1.25637000  | -1.41322500 |
| O | -2.55063700 | 4.06169800  | -1.12422600 |
| O | -2.21552600 | 3.91171100  | 1.63921200  |
| O | 0.11524500  | 3.45657500  | -1.47258300 |
| O | 0.64811900  | 1.82512200  | -2.90296900 |
| O | 1.81961200  | -0.50811600 | -2.37852000 |
| O | -0.05190100 | -2.32886500 | -2.75718600 |
| O | 0.54743900  | -2.56778100 | 1.99780400  |
| O | -1.42136100 | -3.63473500 | -1.56442500 |
| O | -1.11119000 | -3.77550900 | 1.11115300  |
| O | -4.11040300 | -3.00326200 | -1.23143100 |
| O | -3.77826300 | -3.12474200 | 1.46089700  |

|    |             |             |             |
|----|-------------|-------------|-------------|
| O  | -4.56603600 | -1.40078300 | 2.65081300  |
| O  | -5.11804000 | -1.19351400 | -2.07999200 |
| O  | -3.43567100 | -0.56768300 | 0.17906700  |
| O  | -2.38579700 | -1.10020700 | -2.08066000 |
| O  | -1.03408000 | 0.04910400  | -4.03791100 |
| O  | -3.54123500 | 0.67937600  | -3.74511800 |
| O  | -0.07853100 | -0.23631200 | 3.76567400  |
| O  | -0.57851800 | -1.22390000 | -0.24158100 |
| O  | 0.61593300  | 0.98598300  | -0.25118000 |
| O  | 1.23352300  | 1.62027100  | 2.40159600  |
| O  | 2.24417000  | -0.69636300 | 1.55561200  |
| O  | 0.46442400  | 3.35403400  | 1.21982600  |
| O  | -5.79482900 | 1.05123500  | -0.88977500 |
| O  | -5.45367400 | 0.91940300  | 1.90817100  |
| O  | -3.49275600 | 1.95829200  | 0.29592100  |
| O  | -4.03582000 | 2.81321000  | -2.23889900 |
| O  | -3.47358400 | 2.57980600  | 2.92725100  |
| O  | -2.63967000 | 0.24281800  | 4.01130900  |
| O  | -1.84946400 | -1.29499100 | 2.01633500  |
| O  | -1.38872500 | 1.13630000  | 1.46146800  |
| Zr | -2.35389300 | -2.32014700 | -0.04940500 |
| Zr | -0.32497500 | -0.12741700 | -2.09038100 |
| Zr | -3.74876700 | 0.60221800  | -1.47105100 |
| Zr | -3.31563200 | 0.46857100  | 2.05197700  |
| Zr | -1.26073900 | 2.64076100  | 0.04848800  |
| Zr | 0.11044200  | -0.30566800 | 1.48125000  |
| H  | 2.12137400  | -1.26166200 | -1.76985600 |
| Al | 5.67140000  | -2.08099500 | -1.68105300 |
| Al | 5.07493900  | 0.28483700  | -2.90748700 |
| Al | 3.64083200  | -0.72808700 | 0.18103200  |
| Al | 7.05606000  | 0.25057800  | -0.18350500 |
| Al | 4.73217700  | 2.09346000  | -0.99909900 |
| Al | 6.24072100  | -2.54536000 | 0.94344600  |
| Al | 4.85760500  | 1.86269200  | 1.69486100  |
| Al | 5.76237600  | -0.48014500 | 2.60860600  |
| H  | 2.88773500  | 1.10349800  | -2.22493100 |
| H  | 4.93628900  | -4.18915600 | -0.47630400 |
| H  | 9.14307100  | 1.29370500  | 0.19346600  |
| H  | 5.59716200  | -2.75990500 | 3.39273600  |
| H  | 1.87545300  | -2.50586700 | -0.10878300 |
| H  | 5.67921100  | 3.90315600  | 0.45302800  |
| H  | 4.66848000  | 3.95844800  | -2.75489800 |
| H  | 8.01951600  | -1.02720100 | 1.77943100  |
| H  | 4.45132400  | -1.96261000 | 4.12748000  |
| H  | 5.07652900  | 3.31430500  | 3.64674700  |
| H  | 7.30611000  | -0.95412400 | -3.02659800 |
| H  | 3.58453800  | -2.92620600 | -2.19624700 |
| H  | 6.60128400  | 1.36010400  | -4.40788200 |
| H  | 4.12425900  | -2.24047200 | -3.47968600 |
| H  | 3.88965900  | -0.41123900 | -4.89821500 |
| O  | 4.48697500  | -0.77804800 | -1.42625100 |
| O  | 3.69434200  | 1.61494700  | -2.39411300 |
| O  | 5.63349600  | -3.53221500 | -0.55326500 |

|    |             |             |             |
|----|-------------|-------------|-------------|
| O  | 8.77977500  | 0.42802500  | 0.00143500  |
| O  | 6.92173900  | -1.53844100 | -0.44967500 |
| O  | 6.17174500  | 1.13911000  | -1.44626800 |
| O  | 2.64511500  | -2.16694200 | -0.58327100 |
| O  | 6.02210500  | -3.83577500 | 2.17611400  |
| O  | 5.39568800  | 3.47379000  | -2.34478700 |
| O  | 4.82062900  | -1.49293900 | 1.33241900  |
| O  | 3.77678200  | 1.15857800  | 0.31786500  |
| O  | 4.97858300  | 3.24692400  | 0.39055000  |
| O  | 6.27675100  | 0.79963500  | 1.34455000  |
| O  | 7.29605300  | -1.52576300 | 2.19387100  |
| O  | 5.39110500  | -1.91306000 | 3.91521900  |
| O  | 4.24593100  | 0.60113000  | 2.96551500  |
| O  | 5.62190900  | 2.85639500  | 3.00399600  |
| O  | 6.63070500  | 0.62010400  | 3.99554700  |
| O  | 6.37903500  | -1.19718700 | -3.12693900 |
| O  | 5.70606300  | 1.50883300  | -4.09348500 |
| O  | 4.33864500  | -2.98115100 | -2.82813900 |
| O  | 3.84892100  | -0.66603300 | -3.97085700 |
| H  | 3.40188000  | 0.20880700  | 2.66502500  |
| H  | -4.86622700 | -4.32223500 | 3.57070000  |
| H  | -6.11797400 | -3.06004300 | 3.74938500  |
| H  | -6.06115600 | -4.12025600 | 2.30149100  |
| H  | -5.63613800 | -4.17103500 | -2.97781000 |
| H  | -6.64627200 | -3.79791600 | -1.59118200 |
| H  | -6.80233300 | -2.81094100 | -3.07411700 |
| H  | -3.46983300 | 5.96675600  | -2.58386000 |
| H  | -4.81842200 | 4.99196600  | -3.27877800 |
| H  | -4.87011200 | 5.54944700  | -1.59716100 |
| H  | -2.74850700 | 5.64822000  | 3.47133800  |
| H  | -4.30352800 | 5.40416100  | 2.68238400  |
| H  | -4.02113600 | 4.64611700  | 4.26208500  |
| H  | 5.65661900  | 2.81128000  | -3.08267000 |
| H  | 6.79225300  | -4.31352100 | 2.49381500  |
| H  | 3.07713800  | 3.91049900  | 1.73375800  |
| H  | 1.97732100  | 4.68088600  | 2.86263800  |
| H  | 2.89609800  | 3.23135700  | 3.39224000  |
| H  | 2.38722000  | 3.40867700  | -3.80218000 |
| H  | 1.10203500  | 4.65332800  | -3.75948100 |
| H  | 2.22008000  | 4.54445300  | -2.40876400 |
| H  | 1.05144300  | -4.80035600 | -2.89201800 |
| H  | -0.56652100 | -5.55158900 | -2.95041600 |
| H  | 0.00129700  | -4.45566000 | -4.25762900 |
| H  | 0.83636400  | -4.84064400 | 3.30373300  |
| H  | 0.06558400  | -5.80718700 | 2.00481700  |
| H  | 1.63505800  | -4.98961700 | 1.74683700  |
| H  | 7.58729100  | 0.62669800  | 3.87020400  |
| H  | 6.32432000  | 1.56133200  | 3.75513600  |
| Ir | -6.47740100 | 2.26836100  | 0.68251400  |
| C  | -6.95522700 | 3.30052500  | 2.12353100  |
| C  | -7.30436000 | 3.42479000  | -0.48129700 |
| O  | -7.22530300 | 3.94696600  | 3.04189300  |
| O  | -7.80708800 | 4.14799800  | -1.22932100 |

H 2.45378100 -0.54668700 -3.16646600

### Catalytic Hydrogenation Mechanism (Figure 3)

#### Ir(C<sub>2</sub>H<sub>4</sub>)<sub>2</sub>@Al<sub>8</sub>-NU-1000

Electronic Energy: -7190.6433158

Enthalpy: -7189.541475

Free Energy: -7189.758824

|   |             |             |             |
|---|-------------|-------------|-------------|
| C | 1.68444800  | 3.94340000  | -3.15512100 |
| C | 0.64900500  | -4.90821400 | 2.22466400  |
| C | 2.37166400  | 3.70494700  | 2.55373300  |
| C | 0.00185700  | -4.64437500 | -3.17737100 |
| C | -5.46152300 | -3.56982200 | 3.03745400  |
| C | -4.20580500 | 5.17837200  | -2.39073100 |
| C | -6.09808300 | -3.34300800 | -2.42691100 |
| C | -3.54710600 | 4.91457500  | 3.31258600  |
| C | 1.27405600  | 2.82442600  | 2.03808400  |
| C | 0.75414900  | 3.00362100  | -2.46954200 |
| C | -3.54119800 | 3.93046700  | -1.89895400 |
| C | -5.03723600 | -2.44266000 | -1.88258800 |
| C | -4.54349000 | -2.62143200 | 2.33674400  |
| C | -0.02842600 | -3.67127100 | 1.74594700  |
| C | -3.03319100 | 3.71324400  | 2.58679900  |
| C | -0.52889300 | -3.45025300 | -2.44888900 |
| H | -1.87718300 | -1.87338100 | 2.78307500  |
| H | 1.50707900  | 1.36316100  | -0.23584400 |
| H | -3.67098500 | 1.60539200  | -3.98975900 |
| H | -2.58221200 | 0.45249300  | -3.98157100 |
| H | -2.88744700 | 0.97312400  | 4.58789000  |
| H | -6.38112900 | 0.36043600  | -1.31192400 |
| H | -5.92697500 | 0.15782300  | 2.33978000  |
| H | -2.57326100 | -1.62129300 | -2.86563100 |
| H | -4.16881300 | 2.68559600  | 0.39812000  |
| H | -0.50948300 | 0.66019700  | -4.56397900 |
| H | -1.06168900 | -0.03041700 | 3.98304100  |
| H | 0.41273700  | 0.55460200  | 4.02256800  |
| H | 2.26597500  | -1.61074000 | 1.87732400  |
| O | -1.75435200 | 1.26090200  | -1.40474800 |
| O | -2.55794900 | 4.06523500  | -1.11606600 |
| O | -2.22747500 | 3.91653500  | 1.63020100  |
| O | 0.11406800  | 3.45749400  | -1.47346500 |
| O | 0.64691800  | 1.82538400  | -2.90324100 |
| O | 1.81479400  | -0.50583100 | -2.37142000 |
| O | -0.05188500 | -2.32867200 | -2.75631100 |
| O | 0.54555100  | -2.56748000 | 1.99979300  |
| O | -1.42225800 | -3.63537800 | -1.56517700 |
| O | -1.11123200 | -3.77622400 | 1.11109200  |
| O | -4.11506200 | -3.00205500 | -1.22430800 |
| O | -3.78324600 | -3.12356600 | 1.45621700  |
| O | -4.55645900 | -1.40636100 | 2.66610000  |
| O | -5.11081500 | -1.19781100 | -2.09895000 |

|    |             |             |             |
|----|-------------|-------------|-------------|
| O  | -3.44373200 | -0.57206800 | 0.18032600  |
| O  | -2.38584000 | -1.10081400 | -2.07789100 |
| O  | -1.03617600 | 0.04994900  | -4.03518200 |
| O  | -3.54742300 | 0.67732400  | -3.74740300 |
| O  | -0.08782700 | -0.23315400 | 3.76509700  |
| O  | -0.57935500 | -1.22291400 | -0.24019000 |
| O  | 0.61105600  | 0.98914800  | -0.25014100 |
| O  | 1.23151000  | 1.62078000  | 2.40298200  |
| O  | 2.23672500  | -0.69549200 | 1.55456400  |
| O  | 0.46307200  | 3.35468200  | 1.22119400  |
| O  | -5.79991800 | 1.04903100  | -0.96492900 |
| O  | -5.44791800 | 0.91645700  | 1.98266300  |
| O  | -3.54098600 | 1.95613300  | 0.30153900  |
| O  | -4.02409700 | 2.81543600  | -2.25502300 |
| O  | -3.45518400 | 2.58011400  | 2.94317000  |
| O  | -2.64404300 | 0.23931700  | 4.01319900  |
| O  | -1.85235900 | -1.29455700 | 2.01452100  |
| O  | -1.40071300 | 1.14143400  | 1.45474800  |
| Zr | -2.35589200 | -2.31936900 | -0.04851000 |
| Zr | -0.33219700 | -0.12285900 | -2.08552900 |
| Zr | -3.76207400 | 0.59696500  | -1.46926500 |
| Zr | -3.33175400 | 0.46558500  | 2.05248700  |
| Zr | -1.27048300 | 2.64374100  | 0.04938900  |
| Zr | 0.10152300  | -0.29967800 | 1.48193600  |
| H  | 2.11442300  | -1.26197600 | -1.76554800 |
| Al | 5.66179700  | -2.08891700 | -1.67627400 |
| Al | 5.07127300  | 0.27780700  | -2.90391400 |
| Al | 3.63310800  | -0.73174200 | 0.18424000  |
| Al | 7.05154900  | 0.23921200  | -0.17865500 |
| Al | 4.73310500  | 2.08718600  | -0.99548600 |
| Al | 6.22924300  | -2.55444800 | 0.94818800  |
| Al | 4.85625100  | 1.85629900  | 1.69818100  |
| Al | 5.75432100  | -0.48832100 | 2.61263100  |
| H  | 2.88698700  | 1.10124800  | -2.22121700 |
| H  | 4.91811000  | -4.19197800 | -0.47045900 |
| H  | 9.13933000  | 1.27874400  | 0.19931000  |
| H  | 5.58293000  | -2.76733800 | 3.39680100  |
| H  | 1.86750000  | -2.50800200 | -0.10800800 |
| H  | 5.68528100  | 3.89467800  | 0.45644100  |
| H  | 4.67016500  | 3.94898200  | -2.75267400 |
| H  | 8.01065700  | -1.04014500 | 1.78515200  |
| H  | 4.43608100  | -1.96711100 | 4.12576000  |
| H  | 5.07257700  | 3.30257700  | 3.65260300  |
| H  | 7.30009100  | -0.96575500 | -3.01939100 |
| H  | 3.57294600  | -2.92848200 | -2.18911300 |
| H  | 6.60346400  | 1.34879900  | -4.40016900 |
| H  | 4.11333600  | -2.24473800 | -3.47382000 |
| H  | 3.88651900  | -0.41729800 | -4.89494600 |
| O  | 4.48186400  | -0.78206800 | -1.42186900 |
| O  | 3.69441800  | 1.61149000  | -2.39091600 |
| O  | 5.62004900  | -3.54012300 | -0.54821100 |
| O  | 8.77596000  | 0.41317200  | 0.00684700  |
| O  | 6.91415100  | -1.54973500 | -0.44473700 |



|    |             |             |             |
|----|-------------|-------------|-------------|
| O  | 6.17143500  | 1.13063000  | -1.44219900 |
| O  | 2.63969700  | -2.17222200 | -0.58072600 |
| O  | 6.00784100  | -3.84445900 | 2.18109700  |
| O  | 5.39888400  | 3.46688300  | -2.34218100 |
| O  | 4.81208900  | -1.49844800 | 1.33597600  |
| O  | 3.77591900  | 1.15519900  | 0.32101700  |
| O  | 4.98277800  | 3.24052400  | 0.39399000  |
| O  | 6.27422100  | 0.79058800  | 1.34976000  |
| O  | 7.28648500  | -1.53753300 | 2.19974200  |
| O  | 5.37731800  | -1.92031100 | 3.91912900  |
| O  | 4.24037700  | 0.59624700  | 2.96850400  |
| O  | 5.62035200  | 2.84870600  | 3.00897700  |
| O  | 6.62501400  | 0.61000100  | 4.00042400  |
| O  | 6.37292700  | -1.20747100 | -3.12214000 |
| O  | 5.70730600  | 1.49993200  | -4.08958900 |
| O  | 4.32636600  | -2.98577000 | -2.82215000 |
| O  | 3.84416200  | -0.67046200 | -3.96726200 |
| H  | 3.39555800  | 0.20616700  | 2.66665700  |
| H  | -4.86547700 | -4.32294500 | 3.56898800  |
| H  | -6.11571200 | -3.06038400 | 3.75176800  |
| H  | -6.06384000 | -4.11937900 | 2.30300500  |
| H  | -5.63516600 | -4.16844200 | -2.98110900 |
| H  | -6.64505300 | -3.80190300 | -1.59260100 |
| H  | -6.80322100 | -2.81052700 | -3.07283700 |
| H  | -3.46065100 | 5.93241000  | -2.67074000 |
| H  | -4.88364500 | 4.98017900  | -3.22731500 |
| H  | -4.79010000 | 5.60929800  | -1.56529100 |
| H  | -2.74207000 | 5.63809400  | 3.48778000  |
| H  | -4.28619100 | 5.41982000  | 2.67435300  |
| H  | -4.03159200 | 4.64623200  | 4.25703000  |
| H  | 5.65936900  | 2.80293000  | -3.07888700 |
| H  | 6.77779500  | -4.32161100 | 2.50013400  |
| H  | 3.07966500  | 3.90787300  | 1.73523900  |
| H  | 1.97750700  | 4.68186100  | 2.85967100  |
| H  | 2.89383700  | 3.23268400  | 3.39443800  |
| H  | 2.38876400  | 3.40845600  | -3.80044000 |
| H  | 1.10199000  | 4.65127400  | -3.76184100 |
| H  | 2.21855800  | 4.54638500  | -2.40923700 |
| H  | 1.05083900  | -4.80172000 | -2.89052000 |
| H  | -0.56769900 | -5.55120500 | -2.95170400 |
| H  | 0.00318000  | -4.45516200 | -4.25755900 |
| H  | 0.82653000  | -4.84457400 | 3.30570300  |
| H  | 0.06996300  | -5.80797800 | 1.99654700  |
| H  | 1.63960100  | -4.98481000 | 1.75552100  |
| H  | 7.58118900  | 0.61532500  | 3.87185000  |
| H  | 6.31971900  | 1.55153500  | 3.75970500  |
| H  | 2.44493800  | -0.54765000 | -3.16127000 |
| Ir | -6.65304900 | 2.08651400  | 0.68728200  |
| C  | -6.84894200 | 3.45390800  | 2.25559600  |
| C  | -7.86524900 | 2.47438600  | 2.33609800  |
| C  | -8.21648000 | 2.62724500  | -0.58048800 |
| C  | -7.18839300 | 3.59482200  | -0.65721000 |
| H  | -7.08963000 | 4.47775600  | 1.94629000  |

|   |             |            |             |
|---|-------------|------------|-------------|
| H | -5.96701100 | 3.36487000 | 2.90136400  |
| H | -8.90133400 | 2.72639600 | 2.08321300  |
| H | -7.77569400 | 1.65985400 | 3.06613400  |
| H | -9.15609300 | 2.85518800 | -0.06438600 |
| H | -8.32672200 | 1.88737000 | -1.38384600 |
| H | -7.32436800 | 4.58543400 | -0.20775900 |
| H | -6.48983900 | 3.56809700 | -1.50247500 |

**Ir(C<sub>2</sub>H<sub>4</sub>)H<sub>2</sub>@Al<sub>8</sub>-NU-1000**

Electronic Energy: -7113.2699744

Enthalpy: -7112.207984

Free Energy: -7112.422070

|   |             |             |             |
|---|-------------|-------------|-------------|
| C | 1.68443300  | 3.94340300  | -3.15513700 |
| C | 0.64900700  | -4.90820900 | 2.22467400  |
| C | 2.37166100  | 3.70494600  | 2.55373900  |
| C | 0.00186100  | -4.64437400 | -3.17736900 |
| C | -5.46156200 | -3.56978900 | 3.03744800  |
| C | -4.20582200 | 5.17836400  | -2.39072800 |
| C | -6.09811000 | -3.34299300 | -2.42688300 |
| C | -3.54708500 | 4.91456900  | 3.31261100  |
| C | 1.27407600  | 2.82445900  | 2.03810600  |
| C | 0.75415100  | 3.00365800  | -2.46954400 |
| C | -3.54120300 | 3.93045800  | -1.89883700 |
| C | -5.03720900 | -2.44270700 | -1.88244900 |
| C | -4.54350800 | -2.62142700 | 2.33649900  |
| C | -0.02839500 | -3.67129100 | 1.74597300  |
| C | -3.03317900 | 3.71325900  | 2.58669100  |
| C | -0.52888800 | -3.45031000 | -2.44889000 |
| H | -1.88490400 | -1.87725100 | 2.77948900  |
| H | 1.50528800  | 1.36254200  | -0.23500200 |
| H | -3.66532500 | 1.60817400  | -3.99294500 |
| H | -2.57855800 | 0.45274100  | -3.98484700 |
| H | -2.86265100 | 1.02323000  | 4.54366500  |
| H | -6.37999900 | 0.37887800  | -1.33296300 |
| H | -5.93811300 | 0.63073000  | 2.71813100  |
| H | -2.57240900 | -1.62221200 | -2.86902100 |
| H | -4.15695600 | 2.69059100  | 0.40869600  |
| H | -0.50747100 | 0.66133200  | -4.56323900 |
| H | -1.07293200 | -0.03294200 | 3.97605400  |
| H | 0.39881400  | 0.55661500  | 4.02285800  |
| H | 2.26707900  | -1.61025900 | 1.87755600  |
| O | -1.75523600 | 1.26036000  | -1.40541400 |
| O | -2.55797400 | 4.06317200  | -1.11600600 |
| O | -2.23628100 | 3.91541000  | 1.62105400  |
| O | 0.11398400  | 3.45719700  | -1.47320400 |
| O | 0.64704000  | 1.82532000  | -2.90304100 |
| O | 1.81434100  | -0.50633300 | -2.37070600 |
| O | -0.05223200 | -2.32870400 | -2.75655500 |
| O | 0.54593000  | -2.56747300 | 1.99907300  |
| O | -1.42173400 | -3.63639300 | -1.56497300 |

|    |             |             |             |
|----|-------------|-------------|-------------|
| O  | -1.11126000 | -3.77717100 | 1.11150000  |
| O  | -4.11218100 | -3.00304800 | -1.22999600 |
| O  | -3.79554600 | -3.12308500 | 1.44127200  |
| O  | -4.53327500 | -1.41207800 | 2.68153500  |
| O  | -5.11030100 | -1.19765100 | -2.09967600 |
| O  | -3.44308000 | -0.57282900 | 0.17593700  |
| O  | -2.38546400 | -1.10143300 | -2.08138900 |
| O  | -1.03518000 | 0.05047800  | -4.03611700 |
| O  | -3.54425100 | 0.67947200  | -3.75176300 |
| O  | -0.09820200 | -0.23293600 | 3.76393200  |
| O  | -0.58117000 | -1.22405000 | -0.24113700 |
| O  | 0.60910300  | 0.98880000  | -0.24956500 |
| O  | 1.23022200  | 1.62101800  | 2.40366200  |
| O  | 2.23597900  | -0.69511500 | 1.55474300  |
| O  | 0.46206900  | 3.35455500  | 1.22173600  |
| O  | -5.79280500 | 1.04645700  | -0.95596400 |
| O  | -5.46814300 | 0.94327700  | 1.93694300  |
| O  | -3.54673100 | 1.94945600  | 0.30060200  |
| O  | -4.02617000 | 2.81606200  | -2.25506200 |
| O  | -3.44550000 | 2.57910900  | 2.94970200  |
| O  | -2.66158600 | 0.24906300  | 4.00606200  |
| O  | -1.85204400 | -1.29883700 | 2.01098700  |
| O  | -1.40458800 | 1.13679500  | 1.45381200  |
| Zr | -2.35949300 | -2.32512000 | -0.04865800 |
| Zr | -0.33261200 | -0.12438300 | -2.08539900 |
| Zr | -3.76118000 | 0.59527000  | -1.47546200 |
| Zr | -3.33699400 | 0.45794100  | 2.03940200  |
| Zr | -1.27042500 | 2.64166900  | 0.04981000  |
| Zr | 0.10015400  | -0.30339700 | 1.48041400  |
| H  | 2.11397400  | -1.26249300 | -1.76471400 |
| Al | 5.66140600  | -2.08855600 | -1.67581200 |
| Al | 5.07059100  | 0.27766800  | -2.90438800 |
| Al | 3.63263200  | -0.73090600 | 0.18421300  |
| Al | 7.05072300  | 0.24045200  | -0.17907600 |
| Al | 4.73192100  | 2.08766100  | -0.99660600 |
| Al | 6.22916200  | -2.55289000 | 0.94882600  |
| Al | 4.85503700  | 1.85800800  | 1.69713900  |
| Al | 5.75357300  | -0.48616900 | 2.61242300  |
| H  | 2.88596400  | 1.10149000  | -2.22199800 |
| H  | 4.91876700  | -4.19169700 | -0.46934300 |
| H  | 9.13839600  | 1.28021500  | 0.19940600  |
| H  | 5.58312700  | -2.76493600 | 3.39750600  |
| H  | 1.86756300  | -2.50825600 | -0.10740300 |
| H  | 5.68351500  | 3.89597100  | 0.45456900  |
| H  | 4.66907100  | 3.94884900  | -2.75457800 |
| H  | 8.01013400  | -1.03767600 | 1.78507300  |
| H  | 4.43620000  | -1.96503800 | 4.12671100  |
| H  | 5.07206300  | 3.30529900  | 3.65090100  |
| H  | 7.29958800  | -0.96597700 | -3.01949500 |
| H  | 3.57258400  | -2.92853500 | -2.18810400 |
| H  | 6.60218300  | 1.34820200  | -4.40161600 |
| H  | 4.11293800  | -2.24547700 | -3.47319700 |
| H  | 3.88521500  | -0.41826900 | -4.89479400 |

|    |             |             |             |
|----|-------------|-------------|-------------|
| O  | 4.48135800  | -0.78172500 | -1.42182500 |
| O  | 3.69348600  | 1.61149000  | -2.39193100 |
| O  | 5.62021200  | -3.53932300 | -0.54716600 |
| O  | 8.77504500  | 0.41461300  | 0.00704700  |
| O  | 6.91370300  | -1.54856800 | -0.44454600 |
| O  | 6.17045400  | 1.13125300  | -1.44295000 |
| O  | 2.63936400  | -2.17184800 | -0.58031700 |
| O  | 6.00823400  | -3.84244600 | 2.18226200  |
| O  | 5.39771900  | 3.46699100  | -2.34367100 |
| O  | 4.81155900  | -1.49719500 | 1.33625100  |
| O  | 3.77462300  | 1.15604900  | 0.32029600  |
| O  | 4.98111700  | 3.24166900  | 0.39239700  |
| O  | 6.27293300  | 0.79225100  | 1.34891300  |
| O  | 7.28604500  | -1.53505800 | 2.19984500  |
| O  | 5.37729200  | -1.91777400 | 3.91955600  |
| O  | 4.23945800  | 0.59838200  | 2.96797300  |
| O  | 5.61950700  | 2.85099000  | 3.00730800  |
| O  | 6.62420100  | 0.61281300  | 3.99962900  |
| O  | 6.37237100  | -1.20758000 | -3.12202300 |
| O  | 5.70622300  | 1.49946300  | -4.09053300 |
| O  | 4.32600900  | -2.98609200 | -2.82113100 |
| O  | 3.84336500  | -0.67120000 | -3.96702500 |
| H  | 3.39437500  | 0.20842200  | 2.66677400  |
| H  | -4.86702700 | -4.33962300 | 3.54620200  |
| H  | -6.09749600 | -3.06202600 | 3.76905900  |
| H  | -6.08421900 | -4.09792900 | 2.30423900  |
| H  | -5.63471300 | -4.16657700 | -2.98338300 |
| H  | -6.64340100 | -3.80399800 | -1.59265200 |
| H  | -6.80482600 | -2.80997200 | -3.07062400 |
| H  | -3.46235700 | 5.94097800  | -2.65078700 |
| H  | -4.86850500 | 4.98242300  | -3.23991200 |
| H  | -4.80835900 | 5.59612400  | -1.57140400 |
| H  | -2.78485100 | 5.69952600  | 3.36955300  |
| H  | -4.39086800 | 5.32804700  | 2.74159600  |
| H  | -3.91355700 | 4.65802700  | 4.31192000  |
| H  | 5.65849300  | 2.80288900  | -3.08007000 |
| H  | 6.77834500  | -4.31910700 | 2.50165800  |
| H  | 3.07947900  | 3.90860600  | 1.73526400  |
| H  | 1.97720400  | 4.68160800  | 2.86010800  |
| H  | 2.89388400  | 3.23235800  | 3.39420900  |
| H  | 2.38786400  | 3.40847800  | -3.80141600 |
| H  | 1.10203500  | 4.65233200  | -3.76067800 |
| H  | 2.21954900  | 4.54534800  | -2.40911400 |
| H  | 1.05006800  | -4.80330500 | -2.88849400 |
| H  | -0.56915200 | -5.55070700 | -2.95342500 |
| H  | 0.00559200  | -4.45437700 | -4.25740900 |
| H  | 0.82740600  | -4.84430300 | 3.30556000  |
| H  | 0.06935900  | -5.80775400 | 1.99732300  |
| H  | 1.63921200  | -4.98540100 | 1.75479400  |
| H  | 7.58040300  | 0.61786000  | 3.87123500  |
| H  | 6.31906800  | 1.55428200  | 3.75837500  |
| H  | 2.44466200  | -0.54806700 | -3.16053400 |
| Ir | -6.67851100 | 2.09615400  | 0.68244400  |

|   |             |            |             |
|---|-------------|------------|-------------|
| C | -8.27005400 | 2.55078400 | -0.60272900 |
| C | -7.30644500 | 3.58329600 | -0.66559900 |
| H | -9.22545700 | 2.71197700 | -0.09395900 |
| H | -8.32044000 | 1.80903800 | -1.40957200 |
| H | -7.51090900 | 4.56428200 | -0.22615300 |
| H | -6.59498800 | 3.59673700 | -1.50043900 |
| H | -7.70122400 | 2.27933300 | 1.85746200  |
| H | -6.78546300 | 3.29496600 | 1.69030600  |

**Ir(C<sub>2</sub>H<sub>4</sub>)<sub>2</sub>H<sub>2</sub>@Al<sub>8</sub>-NU-1000 (isomer-1)**

Electronic Energy: -7191.8195008

Enthalpy: -7190.698807

Free Energy: -7190.916544

|   |             |             |             |
|---|-------------|-------------|-------------|
| C | 1.68445300  | 3.94340500  | -3.15510700 |
| C | 0.64900400  | -4.90821500 | 2.22466200  |
| C | 2.37166100  | 3.70495400  | 2.55372700  |
| C | 0.00185100  | -4.64437500 | -3.17737500 |
| C | -5.46146600 | -3.56984800 | 3.03749300  |
| C | -4.20579000 | 5.17838300  | -2.39072600 |
| C | -6.09807400 | -3.34300600 | -2.42693000 |
| C | -3.54713700 | 4.91458200  | 3.31255300  |
| C | 1.27402500  | 2.82437100  | 2.03806100  |
| C | 0.75414500  | 3.00358000  | -2.46953900 |
| C | -3.54114700 | 3.93051300  | -1.89899900 |
| C | -5.03726000 | -2.44255300 | -1.88274700 |
| C | -4.54344900 | -2.62145500 | 2.33700200  |
| C | -0.02842500 | -3.67128800 | 1.74594500  |
| C | -3.03327000 | 3.71320800  | 2.58679400  |
| C | -0.52889400 | -3.45023900 | -2.44891200 |
| H | -1.89059300 | -1.88640800 | 2.77236700  |
| H | 1.50033400  | 1.36441800  | -0.23365400 |
| H | -3.66383200 | 1.61233500  | -3.98151300 |
| H | -2.58909500 | 0.44873200  | -3.98297100 |
| H | -2.85911100 | 0.98652700  | 4.57795100  |
| H | -6.31848000 | 0.49512700  | -1.66405800 |
| H | -5.47238600 | 1.83264300  | 2.67997300  |
| H | -2.58797300 | -1.62174800 | -2.85457700 |
| H | -4.22803800 | 2.58400500  | 0.43000700  |
| H | -0.51546300 | 0.65969600  | -4.56415500 |
| H | -1.06226400 | -0.03721300 | 3.97717000  |
| H | 0.41373300  | 0.54486000  | 4.01908900  |
| H | 2.26276000  | -1.60749100 | 1.87557400  |
| O | -1.75568300 | 1.25961700  | -1.40698400 |
| O | -2.57239000 | 4.06491200  | -1.09525500 |
| O | -2.22398900 | 3.90797700  | 1.63731900  |
| O | 0.10999600  | 3.45747900  | -1.47580100 |
| O | 0.64862900  | 1.82470200  | -2.90252900 |
| O | 1.81304100  | -0.50621600 | -2.36605700 |
| O | -0.05211200 | -2.32846400 | -2.75543500 |
| O | 0.54679800  | -2.56762800 | 1.99600400  |

|    |             |             |             |
|----|-------------|-------------|-------------|
| O  | -1.42408600 | -3.63530200 | -1.56644500 |
| O  | -1.11208300 | -3.77755500 | 1.11162300  |
| O  | -4.11818000 | -3.00322200 | -1.22228100 |
| O  | -3.80728700 | -3.12310900 | 1.43096600  |
| O  | -4.53327900 | -1.41428100 | 2.68092700  |
| O  | -5.10023200 | -1.20279800 | -2.12139300 |
| O  | -3.49846100 | -0.58469600 | 0.18638400  |
| O  | -2.39085800 | -1.09899000 | -2.07077800 |
| O  | -1.04033400 | 0.04790300  | -4.03530600 |
| O  | -3.55355200 | 0.67890900  | -3.75236300 |
| O  | -0.08713400 | -0.24294300 | 3.76220100  |
| O  | -0.59099200 | -1.21980200 | -0.24063400 |
| O  | 0.60479900  | 0.98944700  | -0.24879300 |
| O  | 1.22937900  | 1.62149400  | 2.40566300  |
| O  | 2.23341000  | -0.69275500 | 1.55146000  |
| O  | 0.46266600  | 3.35309000  | 1.22004700  |
| O  | -5.82274900 | 1.09359600  | -1.08968200 |
| O  | -5.41700900 | 1.06597300  | 2.09908900  |
| O  | -3.53290100 | 1.93560700  | 0.28985800  |
| O  | -4.00366600 | 2.81923000  | -2.28107000 |
| O  | -3.46811200 | 2.58460300  | 2.94907500  |
| O  | -2.63250500 | 0.24613400  | 4.00543100  |
| O  | -1.85653000 | -1.30646800 | 2.00512700  |
| O  | -1.40959400 | 1.13413800  | 1.45716700  |
| Zr | -2.36398400 | -2.32195400 | -0.04807900 |
| Zr | -0.33596100 | -0.12367800 | -2.08633700 |
| Zr | -3.77314500 | 0.60289700  | -1.47319400 |
| Zr | -3.34934500 | 0.45073600  | 2.05090000  |
| Zr | -1.27513600 | 2.63651500  | 0.04711600  |
| Zr | 0.09514500  | -0.30155000 | 1.48192900  |
| H  | 2.11154100  | -1.26364800 | -1.76158500 |
| Al | 5.65963100  | -2.08936500 | -1.67270200 |
| Al | 5.06962100  | 0.27611000  | -2.90338900 |
| Al | 3.63088500  | -0.73029700 | 0.18535500  |
| Al | 7.04964200  | 0.24013400  | -0.17725300 |
| Al | 4.73212800  | 2.08742000  | -0.99652700 |
| Al | 6.22721600  | -2.55218300 | 0.95210400  |
| Al | 4.85395700  | 1.85936200  | 1.69707000  |
| Al | 5.75091800  | -0.48453600 | 2.61412500  |
| H  | 2.88551600  | 1.10252200  | -2.22135800 |
| H  | 4.91555500  | -4.19027900 | -0.46470500 |
| H  | 9.13676100  | 1.27994500  | 0.20224500  |
| H  | 5.57962800  | -2.76266700 | 3.40033800  |
| H  | 1.87247800  | -2.51514500 | -0.10392200 |
| H  | 5.68485400  | 3.89607900  | 0.45345800  |
| H  | 4.66882100  | 3.94640300  | -2.75653900 |
| H  | 8.00776000  | -1.03648600 | 1.78820200  |
| H  | 4.43105400  | -1.96235600 | 4.12591600  |
| H  | 5.06960800  | 3.30710200  | 3.65023500  |
| H  | 7.29825700  | -0.96829700 | -3.01659700 |
| H  | 3.57060400  | -2.92845900 | -2.18159900 |
| H  | 6.60246000  | 1.34417000  | -4.40061900 |
| H  | 4.10985100  | -2.24752700 | -3.46868700 |

|   |             |             |             |
|---|-------------|-------------|-------------|
| H | 3.88275900  | -0.42075800 | -4.89253600 |
| O | 4.48065000  | -0.78132600 | -1.41986700 |
| O | 3.69374600  | 1.61121700  | -2.39188800 |
| O | 5.61847000  | -3.53954200 | -0.54314300 |
| O | 8.77407000  | 0.41411300  | 0.00964600  |
| O | 6.91250100  | -1.54900500 | -0.44179700 |
| O | 6.17068300  | 1.13068100  | -1.44218800 |
| O | 2.64148400  | -2.17554200 | -0.57906000 |
| O | 6.00611100  | -3.84107000 | 2.18635000  |
| O | 5.39838400  | 3.46631700  | -2.34513900 |
| O | 4.80985600  | -1.49588700 | 1.33818000  |
| O | 3.77443000  | 1.15724300  | 0.32049600  |
| O | 4.98184300  | 3.24242900  | 0.39168100  |
| O | 6.27202900  | 0.79316500  | 1.35049200  |
| O | 7.28379600  | -1.53388400 | 2.20319000  |
| O | 5.37286400  | -1.91538800 | 3.92182400  |
| O | 4.23682500  | 0.60048900  | 2.96808600  |
| O | 5.61801100  | 2.85266200  | 3.00754800  |
| O | 6.62127600  | 0.61486200  | 4.00133600  |
| O | 6.37112400  | -1.20997900 | -3.11969600 |
| O | 5.70642900  | 1.49657000  | -4.09030100 |
| O | 4.32314800  | -2.98742200 | -2.81604700 |
| O | 3.84172700  | -0.67307000 | -3.96458500 |
| H | 3.39180600  | 0.21110000  | 2.66573000  |
| H | -6.24714100 | -3.89132300 | 2.33923100  |
| H | -4.91632700 | -4.47539100 | 3.32930500  |
| H | -5.93140900 | -3.11221800 | 3.91398000  |
| H | -5.63941000 | -4.08205500 | -3.09626800 |
| H | -6.55266200 | -3.91399400 | -1.60669400 |
| H | -6.87271500 | -2.79286000 | -2.97088900 |
| H | -3.49720600 | 6.01165900  | -2.44739500 |
| H | -4.69432600 | 5.01989100  | -3.35809800 |
| H | -4.98749100 | 5.46432800  | -1.67207600 |
| H | -2.76198600 | 5.67044400  | 3.42782200  |
| H | -4.33970600 | 5.37862400  | 2.70739600  |
| H | -3.97079400 | 4.65249700  | 4.28753500  |
| H | 5.65926300  | 2.80125900  | -3.08050900 |
| H | 6.77667900  | -4.31609400 | 2.50707600  |
| H | 3.07995100  | 3.90824000  | 1.73555000  |
| H | 1.97742500  | 4.68190700  | 2.85950400  |
| H | 2.89332100  | 3.23261100  | 3.39468800  |
| H | 2.38969700  | 3.40815200  | -3.79914400 |
| H | 1.10187900  | 4.65006300  | -3.76311600 |
| H | 2.21744800  | 4.54776900  | -2.40947400 |
| H | 1.05227200  | -4.79916000 | -2.89452500 |
| H | -0.56535400 | -5.55186900 | -2.94858000 |
| H | -0.00139700 | -4.45641700 | -4.25781300 |
| H | 0.83874500  | -4.83993200 | 3.30329900  |
| H | 0.06438100  | -5.80687100 | 2.00670000  |
| H | 1.63403200  | -4.99098300 | 1.74484500  |
| H | 7.57736000  | 0.61976200  | 3.87205300  |
| H | 6.31619900  | 1.55621100  | 3.75932200  |
| H | 2.44258500  | -0.54876000 | -3.15622100 |

|    |             |             |             |
|----|-------------|-------------|-------------|
| Ir | -7.17584100 | 1.16722500  | 0.73164100  |
| H  | -8.13130600 | 1.49553400  | 1.93969200  |
| H  | -8.46198800 | 0.88688300  | -0.13940100 |
| C  | -7.88706600 | 3.00823500  | -0.12229600 |
| C  | -6.75428900 | 3.27637600  | 0.66538000  |
| H  | -8.88859200 | 3.25661700  | 0.23440400  |
| H  | -7.78138700 | 2.95774300  | -1.20920500 |
| H  | -6.85200100 | 3.73523600  | 1.65387500  |
| H  | -5.80284300 | 3.45652400  | 0.15424800  |
| C  | -6.92875700 | -0.98411800 | 0.56960800  |
| C  | -7.64687200 | -0.71618800 | 1.73705100  |
| H  | -5.84753400 | -1.15177700 | 0.59600700  |
| H  | -7.44003000 | -1.34013000 | -0.32958800 |
| H  | -7.11873300 | -0.68348400 | 2.69355400  |
| H  | -8.72526100 | -0.88072500 | 1.78331400  |

**Ir(C<sub>2</sub>H<sub>4</sub>)<sub>2</sub>H<sub>2</sub>@Al<sub>8</sub>-NU-1000 (isomer-2)**

Electronic Energy: -7191.8060947

Enthalpy: -7190.685915

Free Energy: -7190.904908

|   |             |             |             |
|---|-------------|-------------|-------------|
| C | 1.68444300  | 3.94340400  | -3.15512200 |
| C | 0.64901100  | -4.90821700 | 2.22464700  |
| C | 2.37165600  | 3.70495100  | 2.55374200  |
| C | 0.00186600  | -4.64437800 | -3.17736000 |
| C | -5.46148600 | -3.56979600 | 3.03753800  |
| C | -4.20578200 | 5.17833800  | -2.39084900 |
| C | -6.09811000 | -3.34294800 | -2.42695500 |
| C | -3.54711300 | 4.91452600  | 3.31266200  |
| C | 1.27405100  | 2.82449000  | 2.03812700  |
| C | 0.75414700  | 3.00370300  | -2.46962200 |
| C | -3.54106200 | 3.93042300  | -1.89871800 |
| C | -5.03723900 | -2.44265000 | -1.88205600 |
| C | -4.54359300 | -2.62147200 | 2.33628100  |
| C | -0.02843100 | -3.67127100 | 1.74596100  |
| C | -3.03323900 | 3.71314100  | 2.58653600  |
| C | -0.52889200 | -3.45022700 | -2.44890700 |
| H | -1.88011500 | -1.88780500 | 2.78308300  |
| H | 1.49518900  | 1.36760000  | -0.23460900 |
| H | -3.60929000 | 1.64150400  | -3.93445900 |
| H | -2.57816900 | 0.44488700  | -3.97079900 |
| H | -2.86602400 | 0.98955700  | 4.59592000  |
| H | -6.36998200 | 1.31911900  | -1.64938800 |
| H | -5.57532800 | 1.89507000  | 2.24874200  |
| H | -2.59281900 | -1.62879100 | -2.85368700 |
| H | -4.22968300 | 2.57576600  | 0.33999500  |
| H | -0.50995800 | 0.65110600  | -4.56284100 |
| H | -1.04518900 | -0.03013900 | 3.98723800  |
| H | 0.43229700  | 0.54494400  | 4.01615100  |
| H | 2.26579500  | -1.60887000 | 1.87596500  |
| O | -1.75733900 | 1.25104000  | -1.41487100 |



|    |             |             |             |
|----|-------------|-------------|-------------|
| O  | -2.55852400 | 4.05994800  | -1.11632000 |
| O  | -2.20651600 | 3.90632600  | 1.65160700  |
| O  | 0.11033800  | 3.45601200  | -1.47518600 |
| O  | 0.64941600  | 1.82447200  | -2.90282800 |
| O  | 1.81928500  | -0.50661100 | -2.36393200 |
| O  | -0.04620900 | -2.33003500 | -2.75126500 |
| O  | 0.54738300  | -2.56847400 | 1.99673700  |
| O  | -1.42359100 | -3.63779400 | -1.56716000 |
| O  | -1.11146300 | -3.77931000 | 1.11177700  |
| O  | -4.12840000 | -3.00375600 | -1.20144000 |
| O  | -3.79435900 | -3.12649900 | 1.44442500  |
| O  | -4.52234500 | -1.41822800 | 2.69515500  |
| O  | -5.07955600 | -1.20360800 | -2.13018900 |
| O  | -3.45747100 | -0.57805500 | 0.18911800  |
| O  | -2.38203400 | -1.11105600 | -2.07017800 |
| O  | -1.03357700 | 0.03722400  | -4.03512700 |
| O  | -3.53645400 | 0.69723000  | -3.73593100 |
| O  | -0.07356700 | -0.24234200 | 3.76716600  |
| O  | -0.58575600 | -1.22562700 | -0.23834600 |
| O  | 0.60092700  | 0.98984500  | -0.24918000 |
| O  | 1.23060500  | 1.62158200  | 2.40542900  |
| O  | 2.23578600  | -0.69405600 | 1.55222700  |
| O  | 0.46451600  | 3.35227800  | 1.21807100  |
| O  | -5.80050300 | 1.16943100  | -0.88643900 |
| O  | -5.42216300 | 0.97461300  | 2.01617100  |
| O  | -3.50471700 | 1.94599600  | 0.29461900  |
| O  | -4.03215100 | 2.81746600  | -2.25743600 |
| O  | -3.49635200 | 2.58733900  | 2.92722900  |
| O  | -2.61785100 | 0.26007800  | 4.01842600  |
| O  | -1.84943500 | -1.30577900 | 2.01731400  |
| O  | -1.40540300 | 1.13206300  | 1.46159700  |
| Zr | -2.36471500 | -2.33236300 | -0.04542800 |
| Zr | -0.33095700 | -0.13212200 | -2.08470400 |
| Zr | -3.76034800 | 0.57954000  | -1.45366500 |
| Zr | -3.34333300 | 0.44796900  | 2.06925200  |
| Zr | -1.27226700 | 2.62883500  | 0.05060900  |
| Zr | 0.09614200  | -0.30585200 | 1.48302500  |
| H  | 2.11880000  | -1.26449000 | -1.76018500 |
| Al | 5.66596100  | -2.08585600 | -1.66952100 |
| Al | 5.07483100  | 0.27983000  | -2.89910700 |
| Al | 3.63423400  | -0.72981000 | 0.18772500  |
| Al | 7.05258600  | 0.24378600  | -0.17163800 |
| Al | 4.73417900  | 2.08954500  | -0.99163200 |
| Al | 6.23160400  | -2.54992700 | 0.95547200  |
| Al | 4.85421700  | 1.85986700  | 1.70188300  |
| Al | 5.75227000  | -0.48377700 | 2.61835300  |
| H  | 2.88916800  | 1.10413800  | -2.21848900 |
| H  | 4.92118500  | -4.18697300 | -0.46273100 |
| H  | 9.13811000  | 1.28568600  | 0.20961600  |
| H  | 5.58202800  | -2.76248300 | 3.40296500  |
| H  | 1.87729500  | -2.51577900 | -0.10512300 |
| H  | 5.68567700  | 3.89773900  | 0.45997400  |
| H  | 4.66924600  | 3.94868900  | -2.75045600 |

|   |             |             |             |
|---|-------------|-------------|-------------|
| H | 8.01013600  | -1.03331800 | 1.79396100  |
| H | 4.43210900  | -1.96346800 | 4.12779100  |
| H | 5.06643200  | 3.30532600  | 3.65670400  |
| H | 7.30486000  | -0.96149500 | -3.01021300 |
| H | 3.57885700  | -2.92886600 | -2.18377600 |
| H | 6.60826400  | 1.35037500  | -4.39369300 |
| H | 4.11947400  | -2.24395800 | -3.46815900 |
| H | 3.88993700  | -0.41617400 | -4.88965200 |
| O | 4.48564800  | -0.77913000 | -1.41678900 |
| O | 3.69723800  | 1.61338900  | -2.38815200 |
| O | 5.62462800  | -3.53674600 | -0.54079200 |
| O | 8.77684600  | 0.41947800  | 0.01600900  |
| O | 6.91748800  | -1.54538600 | -0.43721800 |
| O | 6.17401000  | 1.13443300  | -1.43681800 |
| O | 2.64772400  | -2.17642600 | -0.57818800 |
| O | 6.01079200  | -3.83984900 | 2.18874100  |
| O | 5.39962400  | 3.46991600  | -2.33895600 |
| O | 4.81322300  | -1.49499800 | 1.34103700  |
| O | 3.77677400  | 1.15786200  | 0.32404700  |
| O | 4.98305900  | 3.24378100  | 0.39733700  |
| O | 6.27378000  | 0.79515500  | 1.35606600  |
| O | 7.28646200  | -1.53171500 | 2.20821700  |
| O | 5.37415000  | -1.91575600 | 3.92488500  |
| O | 4.23706700  | 0.59975500  | 2.97165100  |
| O | 5.61635200  | 2.85296000  | 3.01382800  |
| O | 6.62066200  | 0.61544700  | 4.00702100  |
| O | 6.37828200  | -1.20452500 | -3.11514900 |
| O | 5.71149900  | 1.50164100  | -4.08493600 |
| O | 4.33325700  | -2.98433800 | -2.81613800 |
| O | 3.84891900  | -0.66979500 | -3.96205900 |
| H | 3.39267200  | 0.20996300  | 2.66795100  |
| H | -4.86756000 | -4.20248200 | 3.71131900  |
| H | -6.21824300 | -3.04782400 | 3.63280700  |
| H | -5.93911500 | -4.24556300 | 2.31757800  |
| H | -5.64296800 | -4.23206900 | -2.87845400 |
| H | -6.72084900 | -3.69762800 | -1.59347700 |
| H | -6.73921800 | -2.83176100 | -3.15227300 |
| H | -3.49809900 | 6.01208700  | -2.44929700 |
| H | -4.69628600 | 5.01996900  | -3.35729300 |
| H | -4.98611500 | 5.46163900  | -1.66992800 |
| H | -2.76579700 | 5.67514900  | 3.42126000  |
| H | -4.34801800 | 5.37088700  | 2.71312800  |
| H | -3.96410900 | 4.65159000  | 4.29027500  |
| H | 5.66175800  | 2.80552500  | -3.07452700 |
| H | 6.78174500  | -4.31382300 | 2.51008300  |
| H | 3.08081200  | 3.90654200  | 1.73592700  |
| H | 1.97814300  | 4.68270400  | 2.85799900  |
| H | 2.89212200  | 3.23333500  | 3.39584500  |
| H | 2.39052300  | 3.40780900  | -3.79797200 |
| H | 1.10250000  | 4.64940700  | -3.76452200 |
| H | 2.21668400  | 4.54857000  | -2.40957200 |
| H | 1.03679500  | -4.82675100 | -2.85563900 |
| H | -0.59127700 | -5.54295700 | -2.98113700 |

|    |             |             |             |
|----|-------------|-------------|-------------|
| H  | 0.04394400  | -4.44204000 | -4.25418600 |
| H  | 0.84365100  | -4.83804600 | 3.30227100  |
| H  | 0.06238000  | -5.80655900 | 2.01075100  |
| H  | 1.63182700  | -4.99349700 | 1.74067300  |
| H  | 7.57677300  | 0.62125800  | 3.87799300  |
| H  | 6.31488600  | 1.55667800  | 3.76517400  |
| H  | 2.44914700  | -0.54733600 | -3.15386500 |
| Ir | -6.97231100 | 0.17517500  | 0.62261900  |
| C  | -7.85862100 | -0.42129800 | 2.44040600  |
| C  | -8.25775500 | -1.31993600 | 1.43236100  |
| C  | -8.73386800 | 1.50810300  | 0.18347400  |
| C  | -7.85326100 | 2.22335100  | 0.97950200  |
| H  | -8.57415000 | 0.31516200  | 2.82485300  |
| H  | -7.04214000 | -0.67299700 | 3.12385800  |
| H  | -9.27215300 | -1.26949000 | 1.02538400  |
| H  | -7.80408800 | -2.31089700 | 1.35778400  |
| H  | -9.63141600 | 1.04879200  | 0.60953200  |
| H  | -8.78507300 | 1.68071000  | -0.89482900 |
| H  | -8.03208600 | 2.34533100  | 2.05142200  |
| H  | -7.15569900 | 2.93433500  | 0.52554800  |
| H  | -6.00594700 | -1.09918100 | 0.50306900  |
| H  | -7.68172300 | -0.54040600 | -0.59590600 |

### TS1(di-ethyl)@Al<sub>8</sub>-NU-1000 (isomer-1)

Electronic Energy: -7191.790895

Enthalpy: -7190.672510

Free Energy: -7190.890296

|   |             |             |             |
|---|-------------|-------------|-------------|
| C | 1.68444800  | 3.94340000  | -3.15512100 |
| C | 0.64900500  | -4.90821400 | 2.22466400  |
| C | 2.37166400  | 3.70494700  | 2.55373300  |
| C | 0.00185700  | -4.64437500 | -3.17737100 |
| C | -5.46152300 | -3.56982200 | 3.03745400  |
| C | -4.20580500 | 5.17837200  | -2.39073100 |
| C | -6.09808300 | -3.34300800 | -2.42691100 |
| C | -3.54710600 | 4.91457500  | 3.31258600  |
| C | 1.27405600  | 2.82442600  | 2.03808400  |
| C | 0.75414900  | 3.00362100  | -2.46954200 |
| C | -3.54119800 | 3.93046700  | -1.89895400 |
| C | -5.03723600 | -2.44266000 | -1.88258800 |
| C | -4.54349000 | -2.62143200 | 2.33674400  |
| C | -0.02842600 | -3.67127100 | 1.74594700  |
| C | -3.03319100 | 3.71324400  | 2.58679900  |
| C | -0.52889300 | -3.45025300 | -2.44888900 |
| H | -1.87733000 | -1.87082200 | 2.78164600  |
| H | 1.51094900  | 1.36002800  | -0.23833500 |
| H | -3.67736300 | 1.60607700  | -3.97820800 |
| H | -2.59342900 | 0.45104300  | -3.97587700 |
| H | -2.87378700 | 0.97483900  | 4.58832700  |
| H | -6.31844700 | 0.39376100  | -1.55126500 |
| H | -5.82037000 | 0.22640900  | 2.63269300  |

|    |             |             |             |
|----|-------------|-------------|-------------|
| H  | -2.57602400 | -1.61608600 | -2.85968500 |
| H  | -4.25602700 | 2.61907000  | 0.43425800  |
| H  | -0.51934000 | 0.66339400  | -4.55973800 |
| H  | -1.06195900 | -0.03361100 | 3.98404200  |
| H  | 0.41363900  | 0.55199600  | 4.02456700  |
| H  | 2.26283700  | -1.61083300 | 1.87372800  |
| O  | -1.76026800 | 1.26703100  | -1.39341100 |
| O  | -2.56086400 | 4.06897600  | -1.11281400 |
| O  | -2.24387500 | 3.92451100  | 1.61494500  |
| O  | 0.11558000  | 3.45810900  | -1.47229800 |
| O  | 0.64326600  | 1.82636900  | -2.90452300 |
| O  | 1.80915600  | -0.50448300 | -2.37196400 |
| O  | -0.05389700 | -2.32795100 | -2.75671000 |
| O  | 0.54709500  | -2.56777900 | 1.99695100  |
| O  | -1.42232700 | -3.63524600 | -1.56451400 |
| O  | -1.11328500 | -3.77595200 | 1.11391800  |
| O  | -4.11752800 | -3.00123500 | -1.22162300 |
| O  | -3.79544700 | -3.12158200 | 1.44388100  |
| O  | -4.53728800 | -1.41473900 | 2.68777500  |
| O  | -5.10846900 | -1.20066000 | -2.10927700 |
| O  | -3.46800700 | -0.57913800 | 0.18676700  |
| O  | -2.38858200 | -1.09766200 | -2.07066000 |
| O  | -1.04459500 | 0.05288600  | -4.02985800 |
| O  | -3.55828200 | 0.67571200  | -3.74239000 |
| O  | -0.08678300 | -0.23419700 | 3.76268000  |
| O  | -0.58352100 | -1.21966300 | -0.23932300 |
| O  | 0.61393100  | 0.98843300  | -0.25130400 |
| O  | 1.23254000  | 1.62047200  | 2.40119900  |
| O  | 2.23600300  | -0.69551600 | 1.55090600  |
| O  | 0.46100700  | 3.35644100  | 1.22394200  |
| O  | -5.82055100 | 1.06153900  | -1.06071300 |
| O  | -5.42016200 | 0.93090900  | 2.10940600  |
| O  | -3.57944500 | 1.94426600  | 0.31302600  |
| O  | -4.01219800 | 2.81659700  | -2.26577700 |
| O  | -3.41916700 | 2.57885500  | 2.96362800  |
| O  | -2.63646700 | 0.23403500  | 4.01992700  |
| O  | -1.85087000 | -1.29413300 | 2.01160200  |
| O  | -1.40245100 | 1.14671600  | 1.44786000  |
| Zr | -2.35894000 | -2.31744100 | -0.04659900 |
| Zr | -0.33795300 | -0.11794400 | -2.08104000 |
| Zr | -3.76888000 | 0.59990100  | -1.45951300 |
| Zr | -3.33084400 | 0.46673700  | 2.05928000  |
| Zr | -1.27675000 | 2.65367300  | 0.05329500  |
| Zr | 0.10061200  | -0.29577300 | 1.48092200  |
| H  | 2.10818200  | -1.26191500 | -1.76774600 |
| Al | 5.65590000  | -2.09169600 | -1.68283700 |
| Al | 5.06528400  | 0.27488000  | -2.91066000 |
| Al | 3.62995000  | -0.73352400 | 0.17969500  |
| Al | 7.04888100  | 0.23592400  | -0.18715000 |
| Al | 4.73093000  | 2.08461600  | -1.00176000 |
| Al | 6.22718600  | -2.55684100 | 0.94075500  |
| Al | 4.85607000  | 1.85441300  | 1.69163500  |
| Al | 5.75443800  | -0.49029700 | 2.60520400  |

|   |             |             |             |
|---|-------------|-------------|-------------|
| H | 2.88293700  | 1.09992100  | -2.22537000 |
| H | 4.91276900  | -4.19362400 | -0.47564100 |
| H | 9.13690800  | 1.27432300  | 0.19081900  |
| H | 5.58327600  | -2.76895100 | 3.38985000  |
| H | 1.86522000  | -2.51028900 | -0.11013600 |
| H | 5.68438300  | 3.89268200  | 0.44892600  |
| H | 4.66538200  | 3.94443400  | -2.75994700 |
| H | 8.00978300  | -1.04246900 | 1.77529100  |
| H | 4.43636100  | -1.96851000 | 4.11798600  |
| H | 5.07313900  | 3.29828300  | 3.64697100  |
| H | 7.29349800  | -0.97009100 | -3.02710000 |
| H | 3.56540300  | -2.92895700 | -2.19116300 |
| H | 6.59747100  | 1.34409200  | -4.40761200 |
| H | 4.10437200  | -2.24705000 | -3.47757200 |
| H | 3.87877500  | -0.42080000 | -4.90007700 |
| O | 4.47775700  | -0.78362100 | -1.42712700 |
| O | 3.69044800  | 1.60984600  | -2.39613900 |
| O | 5.61552900  | -3.54276500 | -0.55445200 |
| O | 8.77368500  | 0.40880900  | -0.00223000 |
| O | 6.91081900  | -1.55295300 | -0.45326300 |
| O | 6.16861500  | 1.12787500  | -1.45010100 |
| O | 2.63635300  | -2.17406800 | -0.58429000 |
| O | 6.00786900  | -3.84668200 | 2.17428900  |
| O | 5.39553500  | 3.46420000  | -2.34978100 |
| O | 4.81090000  | -1.50027400 | 1.32980700  |
| O | 3.77469800  | 1.15356300  | 0.31584100  |
| O | 4.98180500  | 3.23856400  | 0.38717400  |
| O | 6.27370200  | 0.78851300  | 1.34198000  |
| O | 7.28616600  | -1.53978800 | 2.19100900  |
| O | 5.37786500  | -1.92201000 | 3.91236600  |
| O | 4.24132400  | 0.59470400  | 2.96286500  |
| O | 5.62128900  | 2.84705700  | 3.00178400  |
| O | 6.62746200  | 0.60802300  | 3.99186400  |
| O | 6.36622500  | -1.21140500 | -3.12984700 |
| O | 5.70146800  | 1.49630300  | -4.09710200 |
| O | 4.31762600  | -2.98788400 | -2.82575500 |
| O | 3.83675500  | -0.67299800 | -3.97214000 |
| H | 3.39598400  | 0.20484800  | 2.66190700  |
| H | -6.08162300 | -3.06701700 | 3.78645700  |
| H | -6.10168300 | -4.08061800 | 2.30601600  |
| H | -4.86901200 | -4.35449300 | 3.52520300  |
| H | -6.66139400 | -3.78222300 | -1.59203100 |
| H | -6.79138800 | -2.81476000 | -3.08943600 |
| H | -5.63641600 | -4.18218300 | -2.96096700 |
| H | -4.61952200 | 5.72698600  | -1.53355000 |
| H | -3.46756500 | 5.84760100  | -2.85083800 |
| H | -5.00959700 | 4.96228400  | -3.10172600 |
| H | -2.72565600 | 5.60160100  | 3.54972700  |
| H | -4.22709000 | 5.46843200  | 2.65019000  |
| H | -4.08785500 | 4.64086300  | 4.22379900  |
| H | 5.65552900  | 2.79970300  | -3.08605000 |
| H | 6.77909600  | -4.32148100 | 2.49377100  |
| H | 3.07997900  | 3.90731200  | 1.73530500  |

|    |             |             |             |
|----|-------------|-------------|-------------|
| H  | 1.97765100  | 4.68206000  | 2.85912400  |
| H  | 2.89371600  | 3.23279500  | 3.39456900  |
| H  | 2.38467700  | 3.40943500  | -3.80570500 |
| H  | 1.10153900  | 4.65591800  | -3.75591300 |
| H  | 2.22347300  | 4.54131200  | -2.40866000 |
| H  | -0.56748800 | -5.55122900 | -2.95120500 |
| H  | 0.00244100  | -4.45529600 | -4.25758600 |
| H  | 1.05099600  | -4.80167500 | -2.89110300 |
| H  | 0.82859100  | -4.84352800 | 3.30530600  |
| H  | 0.06885700  | -5.80782000 | 1.99866800  |
| H  | 1.63862700  | -4.98607600 | 1.75368300  |
| H  | 7.58327400  | 0.61329600  | 3.86058200  |
| H  | 6.32173200  | 1.54943300  | 3.75115600  |
| H  | 2.43594100  | -0.54839500 | -3.16379400 |
| Ir | -7.03905700 | 1.57720000  | 0.73460200  |
| C  | -7.95164100 | 2.98022200  | -0.51578700 |
| H  | -8.05536400 | 1.75451400  | 1.93222300  |
| C  | -8.47559300 | 0.13182100  | 0.01798500  |
| C  | -7.47484200 | -0.55123900 | 0.73675400  |
| H  | -6.89041800 | 2.87941000  | 1.62837500  |
| H  | -8.91815200 | 3.37903500  | -0.18975400 |
| H  | -7.94543000 | 2.64607100  | -1.55860800 |
| C  | -6.74127500 | 3.58428800  | -0.00836900 |
| H  | -9.46416600 | 0.29406100  | 0.45348600  |
| H  | -8.47316300 | 0.13460700  | -1.07805500 |
| H  | -7.68061400 | -0.90457200 | 1.75166800  |
| H  | -6.65439100 | -1.06705200 | 0.22635300  |
| H  | -6.79872900 | 4.48469500  | 0.61225000  |
| H  | -5.85902300 | 3.55630400  | -0.65817000 |

### TS1(di-ethyl)@Al<sub>8</sub>-NU-1000 (isomer-2)

Electronic Energy: -7191.8030383

Enthalpy: -7190.684186

Free Energy: -7190.900975

|   |             |             |             |
|---|-------------|-------------|-------------|
| C | 1.68444800  | 3.94340000  | -3.15512100 |
| C | 0.64900500  | -4.90821400 | 2.22466400  |
| C | 2.37166400  | 3.70494700  | 2.55373300  |
| C | 0.00185700  | -4.64437500 | -3.17737100 |
| C | -5.46152300 | -3.56982200 | 3.03745400  |
| C | -4.20580500 | 5.17837200  | -2.39073100 |
| C | -6.09808300 | -3.34300800 | -2.42691100 |
| C | -3.54710600 | 4.91457500  | 3.31258600  |
| C | 1.27405600  | 2.82442600  | 2.03808400  |
| C | 0.75414900  | 3.00362100  | -2.46954200 |
| C | -3.54119800 | 3.93046700  | -1.89895400 |
| C | -5.03723600 | -2.44266000 | -1.88258800 |
| C | -4.54349000 | -2.62143200 | 2.33674400  |
| C | -0.02842600 | -3.67127100 | 1.74594700  |
| C | -3.03319100 | 3.71324400  | 2.58679900  |
| C | -0.52889300 | -3.45025300 | -2.44888900 |

|    |             |             |             |
|----|-------------|-------------|-------------|
| H  | -1.88537000 | -1.87607000 | 2.77675300  |
| H  | 1.49851800  | 1.36444300  | -0.24335900 |
| H  | -3.64725000 | 1.60671200  | -3.97189300 |
| H  | -2.58637100 | 0.43669400  | -3.97247500 |
| H  | -2.86908800 | 0.98181700  | 4.59353300  |
| H  | -5.93176900 | 2.03460800  | -1.69724500 |
| H  | -5.81082800 | 0.13283700  | 2.51718700  |
| H  | -2.58357700 | -1.63803800 | -2.85238800 |
| H  | -4.25286000 | 2.58545700  | 0.41090100  |
| H  | -0.51412600 | 0.65531500  | -4.56427800 |
| H  | -1.05546500 | -0.03324300 | 3.98454800  |
| H  | 0.41955000  | 0.55103000  | 4.01617600  |
| H  | 2.26636900  | -1.61170700 | 1.87062300  |
| O  | -1.76992600 | 1.25680400  | -1.40561400 |
| O  | -2.56718300 | 4.05704500  | -1.10765800 |
| O  | -2.22779600 | 3.91786900  | 1.63022000  |
| O  | 0.11116600  | 3.45717000  | -1.47420600 |
| O  | 0.64411100  | 1.82621300  | -2.90449600 |
| O  | 1.80903700  | -0.50354000 | -2.36758100 |
| O  | -0.05036900 | -2.32893300 | -2.75358400 |
| O  | 0.54697300  | -2.56749900 | 1.99762700  |
| O  | -1.42113100 | -3.63785200 | -1.56415700 |
| O  | -1.11249700 | -3.77600300 | 1.11299400  |
| O  | -4.12132900 | -3.00898000 | -1.21169300 |
| O  | -3.78926900 | -3.12329500 | 1.45204300  |
| O  | -4.53842600 | -1.41427900 | 2.68845200  |
| O  | -5.10053500 | -1.20358400 | -2.10050700 |
| O  | -3.49534300 | -0.58503500 | 0.18622500  |
| O  | -2.38621000 | -1.11324700 | -2.07016400 |
| O  | -1.03656600 | 0.04075300  | -4.03634500 |
| O  | -3.54746500 | 0.67350600  | -3.73921300 |
| O  | -0.08222600 | -0.23726200 | 3.76244700  |
| O  | -0.59044100 | -1.22082700 | -0.23834300 |
| O  | 0.60323000  | 0.98899000  | -0.25315000 |
| O  | 1.23370000  | 1.62012300  | 2.40185700  |
| O  | 2.23729700  | -0.69659600 | 1.54745200  |
| O  | 0.46200800  | 3.35356200  | 1.22138800  |
| O  | -5.79618800 | 1.24898800  | -1.15498000 |
| O  | -5.42564100 | 0.90474900  | 2.08337200  |
| O  | -3.54315300 | 1.94008400  | 0.31667200  |
| O  | -4.02088800 | 2.82297500  | -2.27964800 |
| O  | -3.44944600 | 2.58313400  | 2.95241700  |
| O  | -2.63287200 | 0.24296500  | 4.02257000  |
| O  | -1.85495900 | -1.29471600 | 2.01039400  |
| O  | -1.39822500 | 1.14036700  | 1.45432800  |
| Zr | -2.36652100 | -2.32328300 | -0.05256800 |
| Zr | -0.34277000 | -0.12457100 | -2.08523400 |
| Zr | -3.78448000 | 0.58578900  | -1.45682100 |
| Zr | -3.32613900 | 0.46524900  | 2.06145700  |
| Zr | -1.27613700 | 2.63841700  | 0.04994600  |
| Zr | 0.10154200  | -0.30298400 | 1.47947600  |
| H  | 2.10802400  | -1.26274600 | -1.76613200 |
| Al | 5.65740100  | -2.09082200 | -1.68588700 |

|    |             |             |             |
|----|-------------|-------------|-------------|
| Al | 5.06437100  | 0.27558700  | -2.91340800 |
| Al | 3.63241200  | -0.73362200 | 0.17744400  |
| Al | 7.04997600  | 0.23760300  | -0.19045500 |
| Al | 4.73107600  | 2.08498100  | -1.00378800 |
| Al | 6.23015700  | -2.55563300 | 0.93762800  |
| Al | 4.85690100  | 1.85463500  | 1.68937500  |
| Al | 5.75721500  | -0.48951100 | 2.60252300  |
| H  | 2.88264700  | 1.10037600  | -2.22624600 |
| H  | 4.91604800  | -4.19285800 | -0.47822200 |
| H  | 9.13761700  | 1.27673800  | 0.18754500  |
| H  | 5.58811300  | -2.76822200 | 3.38728400  |
| H  | 1.87241000  | -2.51768300 | -0.11007400 |
| H  | 5.68418100  | 3.89349400  | 0.44661900  |
| H  | 4.66393600  | 3.94509900  | -2.76181600 |
| H  | 8.01230600  | -1.04024400 | 1.77119700  |
| H  | 4.44121800  | -1.96849300 | 4.11632900  |
| H  | 5.07195000  | 3.29616700  | 3.64590100  |
| H  | 7.29330000  | -0.96776900 | -3.03132300 |
| H  | 3.56715600  | -2.92982800 | -2.19212100 |
| H  | 6.59492200  | 1.34493700  | -4.41208000 |
| H  | 4.10411000  | -2.24678600 | -3.47886800 |
| H  | 3.87464500  | -0.42095300 | -4.90086100 |
| O  | 4.47909400  | -0.78303300 | -1.42923100 |
| O  | 3.69013900  | 1.61016800  | -2.39759000 |
| O  | 5.61870100  | -3.54190600 | -0.55726100 |
| O  | 8.77477400  | 0.41105800  | -0.00547700 |
| O  | 6.91252800  | -1.55128200 | -0.45660200 |
| O  | 6.16903200  | 1.12920700  | -1.45302400 |
| O  | 2.64110800  | -2.17743700 | -0.58517100 |
| O  | 6.01180600  | -3.84540300 | 2.17151100  |
| O  | 5.39458100  | 3.46523100  | -2.35209700 |
| O  | 4.81336900  | -1.49990900 | 1.32784900  |
| O  | 3.77584400  | 1.15332500  | 0.31413100  |
| O  | 4.98189700  | 3.23904900  | 0.38508900  |
| O  | 6.27515900  | 0.78966500  | 1.33923800  |
| O  | 7.28931200  | -1.53807300 | 2.18743100  |
| O  | 5.38253100  | -1.92139000 | 3.91003200  |
| O  | 4.24335700  | 0.59447800  | 2.96100300  |
| O  | 5.62130700  | 2.84782200  | 2.99971200  |
| O  | 6.63011600  | 0.60950100  | 3.98877400  |
| O  | 6.36616300  | -1.20990800 | -3.13327000 |
| O  | 5.69953400  | 1.49736000  | -4.09992900 |
| O  | 4.31895900  | -2.98755400 | -2.82746400 |
| O  | 3.83478100  | -0.67286500 | -3.97275800 |
| H  | 3.39802000  | 0.20477000  | 2.66017100  |
| H  | -6.14427700 | -3.05559800 | 3.72153200  |
| H  | -6.03105000 | -4.15697100 | 2.30585900  |
| H  | -4.86189300 | -4.29018300 | 3.60937100  |
| H  | -6.72297100 | -3.69688800 | -1.59480200 |
| H  | -6.73813400 | -2.83076400 | -3.15257200 |
| H  | -5.64562200 | -4.23389900 | -2.87753800 |
| H  | -4.64742100 | 5.03452700  | -3.38288700 |
| H  | -5.02592400 | 5.43009000  | -1.70239700 |



|    |             |             |             |
|----|-------------|-------------|-------------|
| H  | -3.51267300 | 6.02607200  | -2.39755500 |
| H  | -2.73079300 | 5.61326100  | 3.53225200  |
| H  | -4.24440200 | 5.45676900  | 2.65759300  |
| H  | -4.07016100 | 4.64299700  | 4.23524700  |
| H  | 5.65436200  | 2.80080900  | -3.08844900 |
| H  | 6.78306700  | -4.32092500 | 2.48982200  |
| H  | 3.08221500  | 3.90345700  | 1.73625800  |
| H  | 1.97893800  | 4.68387000  | 2.85502400  |
| H  | 2.89105200  | 3.23445600  | 3.39711300  |
| H  | 2.38839500  | 3.40812600  | -3.80055800 |
| H  | 1.10148900  | 4.65082500  | -3.76187300 |
| H  | 2.21886600  | 4.54680100  | -2.40972100 |
| H  | -0.58056600 | -5.54679900 | -2.96729200 |
| H  | 0.02500600  | -4.44819600 | -4.25598200 |
| H  | 1.04349700  | -4.81513700 | -2.87166600 |
| H  | 0.83199200  | -4.84242600 | 3.30466200  |
| H  | 0.06729100  | -5.80740600 | 2.00113800  |
| H  | 1.63713400  | -4.98785300 | 1.75077700  |
| H  | 7.58580800  | 0.61537900  | 3.85659900  |
| H  | 6.32358900  | 1.55067700  | 3.74805300  |
| H  | 2.43387700  | -0.54807000 | -3.16069000 |
| Ir | -6.98656300 | 1.64182100  | 0.68878500  |
| C  | -8.08058400 | 2.07033600  | 2.38169000  |
| C  | -8.31875700 | 0.22466500  | -0.27878800 |
| C  | -7.38509800 | -0.47125300 | 0.49737700  |
| H  | -6.32295300 | 3.15460700  | 1.03109100  |
| H  | -7.87393400 | 1.39715700  | 3.22371300  |
| H  | -9.15143700 | 2.24624400  | 2.22720700  |
| C  | -7.17130800 | 3.19029500  | 2.20501500  |
| H  | -9.34592800 | 0.36029800  | 0.06950300  |
| H  | -8.17029900 | 0.29775000  | -1.35884900 |
| H  | -7.66759400 | -0.87134800 | 1.47754900  |
| H  | -6.50208100 | -0.92313400 | 0.03452900  |
| H  | -6.31963800 | 3.25592600  | 2.89282800  |
| H  | -7.59168900 | 4.16832200  | 1.94674800  |
| H  | -7.99088700 | 2.46862000  | -0.21514300 |

### TS1(mono-ethyl)@Al<sub>8</sub>-NU-1000

Electronic Energy: -7113.2495019

Enthalpy: -7112.188943

Free Energy: -7112.402752

|   |             |             |             |
|---|-------------|-------------|-------------|
| C | 1.68444800  | 3.94340000  | -3.15512100 |
| C | 0.64900500  | -4.90821400 | 2.22466400  |
| C | 2.37166400  | 3.70494700  | 2.55373300  |
| C | 0.00185700  | -4.64437500 | -3.17737100 |
| C | -5.46152300 | -3.56982200 | 3.03745400  |
| C | -4.20580500 | 5.17837200  | -2.39073100 |
| C | -6.09808300 | -3.34300800 | -2.42691100 |
| C | -3.54710600 | 4.91457500  | 3.31258600  |
| C | 1.27405600  | 2.82442600  | 2.03808400  |

|    |             |             |             |
|----|-------------|-------------|-------------|
| C  | 0.75414900  | 3.00362100  | -2.46954200 |
| C  | -3.54119800 | 3.93046700  | -1.89895400 |
| C  | -5.03723600 | -2.44266000 | -1.88258800 |
| C  | -4.54349000 | -2.62143200 | 2.33674400  |
| C  | -0.02842600 | -3.67127100 | 1.74594700  |
| C  | -3.03319100 | 3.71324400  | 2.58679900  |
| C  | -0.52889300 | -3.45025300 | -2.44888900 |
| H  | -1.88280600 | -1.87954000 | 2.77514900  |
| H  | 1.50371000  | 1.36258900  | -0.23298800 |
| H  | -3.69168400 | 1.59071900  | -4.01718700 |
| H  | -2.58883900 | 0.45071700  | -3.99131500 |
| H  | -2.89746100 | 0.92509200  | 4.62822600  |
| H  | -6.40481000 | 0.31394800  | -1.22942000 |
| H  | -5.98830600 | 0.17781100  | 2.06445800  |
| H  | -2.58162700 | -1.62243800 | -2.85542600 |
| H  | -3.78515400 | 2.95556700  | 0.34304100  |
| H  | -0.51204300 | 0.65530600  | -4.56868100 |
| H  | -1.05533100 | -0.04306300 | 3.99767400  |
| H  | 0.41700900  | 0.54910200  | 4.03062300  |
| H  | 2.25830000  | -1.60771900 | 1.87217100  |
| O  | -1.76456500 | 1.27436900  | -1.39641500 |
| O  | -2.57704100 | 4.06022500  | -1.08683000 |
| O  | -2.26704200 | 3.91067300  | 1.59119800  |
| O  | 0.12071500  | 3.46195100  | -1.47003100 |
| O  | 0.63823200  | 1.82771500  | -2.90236100 |
| O  | 1.79985100  | -0.49836300 | -2.35909400 |
| O  | -0.05469100 | -2.32698900 | -2.75880300 |
| O  | 0.54508900  | -2.56626400 | 2.00377800  |
| O  | -1.42432900 | -3.62894200 | -1.56501700 |
| O  | -1.11037400 | -3.77002900 | 1.10926500  |
| O  | -4.12304100 | -2.99665000 | -1.20595300 |
| O  | -3.77576700 | -3.12239600 | 1.46090000  |
| O  | -4.56521700 | -1.40408700 | 2.65643600  |
| O  | -5.10402400 | -1.20460500 | -2.11707300 |
| O  | -3.45832400 | -0.53105900 | 0.18615800  |
| O  | -2.39817600 | -1.09195900 | -2.07322400 |
| O  | -1.04209100 | 0.05122500  | -4.03631400 |
| O  | -3.55586100 | 0.66780900  | -3.76229300 |
| O  | -0.08231700 | -0.23736700 | 3.76752300  |
| O  | -0.58521400 | -1.21464300 | -0.23784000 |
| O  | 0.60220200  | 1.00073400  | -0.24571300 |
| O  | 1.22593200  | 1.62219500  | 2.40250000  |
| O  | 2.22889800  | -0.69244000 | 1.54879900  |
| O  | 0.46657100  | 3.35888400  | 1.21946500  |
| O  | -5.81660100 | 1.06542600  | -1.09954200 |
| O  | -5.42729600 | 0.95890100  | 2.00875100  |
| O  | -3.66063200 | 1.99371200  | 0.32134800  |
| O  | -4.00115000 | 2.81837100  | -2.28328800 |
| O  | -3.40881100 | 2.57574100  | 2.97657900  |
| O  | -2.63396700 | 0.21303000  | 4.03466700  |
| O  | -1.85801400 | -1.28850500 | 2.01575500  |
| O  | -1.40967000 | 1.14870800  | 1.45507300  |
| Zr | -2.36873100 | -2.29913300 | -0.04642700 |

|    |             |             |             |
|----|-------------|-------------|-------------|
| Zr | -0.34959200 | -0.11776500 | -2.08493400 |
| Zr | -3.80343300 | 0.60625700  | -1.49129800 |
| Zr | -3.33492700 | 0.47281900  | 2.08938200  |
| Zr | -1.23726100 | 2.63045000  | 0.04378500  |
| Zr | 0.09511600  | -0.30083800 | 1.48594100  |
| H  | 2.09698000  | -1.25965500 | -1.75792700 |
| Al | 5.64655800  | -2.09020200 | -1.68590400 |
| Al | 5.05517800  | 0.27721600  | -2.91291800 |
| Al | 3.62603100  | -0.73088900 | 0.17907900  |
| Al | 7.04290000  | 0.23727600  | -0.19172900 |
| Al | 4.72554400  | 2.08768700  | -1.00341900 |
| Al | 6.22137500  | -2.55490800 | 0.93750500  |
| Al | 4.85222300  | 1.85721800  | 1.68984200  |
| Al | 5.75191200  | -0.48790600 | 2.60283700  |
| H  | 2.87721300  | 1.10099000  | -2.21988800 |
| H  | 4.90641300  | -4.19314700 | -0.47763800 |
| H  | 9.13311300  | 1.27309800  | 0.18629600  |
| H  | 5.58241900  | -2.76655400 | 3.38836000  |
| H  | 1.86390800  | -2.51426700 | -0.10689400 |
| H  | 5.67960400  | 3.89481900  | 0.44712400  |
| H  | 4.66404800  | 3.95112300  | -2.76131700 |
| H  | 8.00607900  | -1.04064600 | 1.76900200  |
| H  | 4.43865300  | -1.96642400 | 4.12266100  |
| H  | 5.07710400  | 3.30592200  | 3.64316600  |
| H  | 7.28141200  | -0.97003400 | -3.03699000 |
| H  | 3.55463900  | -2.92686300 | -2.18756000 |
| H  | 6.58162400  | 1.34467200  | -4.41825800 |
| H  | 4.08936100  | -2.24511200 | -3.47586500 |
| H  | 3.85608100  | -0.41732200 | -4.89674300 |
| O  | 4.46993500  | -0.78046700 | -1.42819100 |
| O  | 3.68163600  | 1.61402700  | -2.39530900 |
| O  | 5.60759100  | -3.54064400 | -0.55686900 |
| O  | 8.76745800  | 0.40850000  | -0.00617300 |
| O  | 6.90261400  | -1.55118600 | -0.45792100 |
| O  | 6.16134500  | 1.12965200  | -1.45355900 |
| O  | 2.63216200  | -2.17373500 | -0.58255700 |
| O  | 6.00196100  | -3.84369700 | 2.17174400  |
| O  | 5.39100800  | 3.46568200  | -2.35176600 |
| O  | 4.80534600  | -1.49776900 | 1.32925000  |
| O  | 3.76702700  | 1.15710700  | 0.31511700  |
| O  | 4.97618000  | 3.24151500  | 0.38530900  |
| O  | 6.26752000  | 0.79029100  | 1.33735200  |
| O  | 7.28220900  | -1.53722800 | 2.18528100  |
| O  | 5.37867700  | -1.91903000 | 3.91078100  |
| O  | 4.23821900  | 0.59772800  | 2.96174000  |
| O  | 5.62062600  | 2.84926100  | 2.99796300  |
| O  | 6.62587700  | 0.61050800  | 3.98768300  |
| O  | 6.35322100  | -1.20983700 | -3.13466000 |
| O  | 5.68842800  | 1.49829800  | -4.10049200 |
| O  | 4.30487700  | -2.98561400 | -2.82476400 |
| O  | 3.81994500  | -0.66914000 | -3.96843500 |
| H  | 3.39324700  | 0.20700300  | 2.66190700  |
| H  | -4.86452400 | -4.28525800 | 3.61819800  |

|    |             |             |             |
|----|-------------|-------------|-------------|
| H  | -6.15127400 | -3.05223800 | 3.71115700  |
| H  | -6.02174300 | -4.16267000 | 2.30373500  |
| H  | -5.63572400 | -4.17418400 | -2.97317000 |
| H  | -6.65226300 | -3.79493500 | -1.59351000 |
| H  | -6.79586400 | -2.81031100 | -3.08034900 |
| H  | -3.46262500 | 5.88259100  | -2.78530300 |
| H  | -4.96473500 | 4.96412800  | -3.14979100 |
| H  | -4.68064400 | 5.68397300  | -1.53811600 |
| H  | -4.46394000 | 5.24645900  | 2.80423100  |
| H  | -3.81514700 | 4.67314500  | 4.34627200  |
| H  | -2.83005300 | 5.74173600  | 3.27633600  |
| H  | 5.64837700  | 2.80130700  | -3.08905100 |
| H  | 6.77120100  | -4.32404200 | 2.48767800  |
| H  | 3.07656500  | 3.91185100  | 1.73359100  |
| H  | 1.97587300  | 4.67994400  | 2.86357500  |
| H  | 2.89686300  | 3.23145100  | 3.39181900  |
| H  | 2.37759900  | 3.41107000  | -3.81440800 |
| H  | 1.10086200  | 4.66401700  | -3.74546900 |
| H  | 2.23151100  | 4.53217500  | -2.40736700 |
| H  | 1.06034700  | -4.78341000 | -2.91808900 |
| H  | -0.54959500 | -5.55658700 | -2.92964600 |
| H  | -0.02888800 | -4.46535800 | -4.25898600 |
| H  | 0.81251500  | -4.84983200 | 3.30821900  |
| H  | 0.07578700  | -5.80870800 | 1.98503700  |
| H  | 1.64552900  | -4.97798700 | 1.76734500  |
| H  | 7.58213400  | 0.61396700  | 3.85965500  |
| H  | 6.32184600  | 1.55245100  | 3.74730900  |
| H  | 2.42504300  | -0.54433400 | -3.15296100 |
| Ir | -6.05214200 | 2.45646800  | 0.67331000  |
| C  | -8.06324600 | 2.74821000  | 0.61184600  |
| H  | -6.06929600 | 3.67419800  | -0.40988500 |
| H  | -6.06552300 | 3.45781400  | 1.88852300  |
| H  | -8.53804600 | 3.18572700  | 1.49769800  |
| H  | -8.61605800 | 1.87708700  | 0.23213000  |
| C  | -7.47890600 | 3.64831300  | -0.37444800 |
| H  | -7.56415000 | 4.72744600  | -0.19343200 |
| H  | -7.61831000 | 3.40434400  | -1.43643800 |

**Ir(C<sub>2</sub>H<sub>5</sub>) (C<sub>2</sub>H<sub>4</sub>) H@Al<sub>8</sub>-NU-1000**

Electronic Energy: -7191.8205137

Enthalpy: -7190.697895

Free Energy: -7190.917192

|   |             |             |             |
|---|-------------|-------------|-------------|
| C | 1.68444400  | 3.94340200  | -3.15512400 |
| C | 0.64900600  | -4.90821500 | 2.22466000  |
| C | 2.37166400  | 3.70494300  | 2.55373900  |
| C | 0.00185900  | -4.64437600 | -3.17736700 |
| C | -5.46154800 | -3.56981600 | 3.03742900  |
| C | -4.20581200 | 5.17836300  | -2.39074400 |
| C | -6.09809700 | -3.34300200 | -2.42689500 |
| C | -3.54708600 | 4.91457200  | 3.31260500  |

|   |             |             |             |
|---|-------------|-------------|-------------|
| C | 1.27405300  | 2.82442400  | 2.03808100  |
| C | 0.75415000  | 3.00363900  | -2.46956100 |
| C | -3.54120500 | 3.93043200  | -1.89896900 |
| C | -5.03718800 | -2.44268600 | -1.88246900 |
| C | -4.54354100 | -2.62138500 | 2.33664000  |
| C | -0.02841400 | -3.67126600 | 1.74592500  |
| C | -3.03318400 | 3.71322200  | 2.58683000  |
| C | -0.52887500 | -3.45023500 | -2.44887700 |
| H | -1.87509300 | -1.87844900 | 2.78285900  |
| H | 1.50863100  | 1.36003800  | -0.24065400 |
| H | -3.66762700 | 1.60477200  | -3.96674800 |
| H | -2.59548100 | 0.44046500  | -3.97480100 |
| H | -2.85167100 | 1.00392800  | 4.57205000  |
| H | -6.42748500 | 0.76785600  | -1.59620100 |
| H | -5.86553900 | 0.37812500  | 2.69316000  |
| H | -2.58070900 | -1.62449600 | -2.85982600 |
| H | -4.19635100 | 2.65685000  | 0.41669600  |
| H | -0.52250900 | 0.66368900  | -4.56091000 |
| H | -1.05256900 | -0.03712800 | 3.98279700  |
| H | 0.42069900  | 0.54955800  | 4.01803200  |
| H | 2.27215600  | -1.61028900 | 1.87407400  |
| O | -1.76038400 | 1.25500800  | -1.39677200 |
| O | -2.56119900 | 4.06050500  | -1.10895700 |
| O | -2.22677700 | 3.91664900  | 1.62941000  |
| O | 0.11420100  | 3.45708400  | -1.47269300 |
| O | 0.64380300  | 1.82611200  | -2.90425100 |
| O | 1.81251000  | -0.50666000 | -2.37457500 |
| O | -0.05355000 | -2.32840600 | -2.75737700 |
| O | 0.54958300  | -2.56844200 | 1.99386700  |
| O | -1.41962900 | -3.63772500 | -1.56323000 |
| O | -1.11347400 | -3.77728700 | 1.11499400  |
| O | -4.11350200 | -3.00518400 | -1.22634200 |
| O | -3.79823300 | -3.12046100 | 1.43948200  |
| O | -4.52031800 | -1.41851500 | 2.70103400  |
| O | -5.10435300 | -1.19775400 | -2.09980700 |
| O | -3.44834100 | -0.57735100 | 0.18436900  |
| O | -2.38489500 | -1.10492400 | -2.07361300 |
| O | -1.04458000 | 0.04951900  | -4.03206400 |
| O | -3.55898100 | 0.67059000  | -3.73950600 |
| O | -0.07973000 | -0.23891700 | 3.76230200  |
| O | -0.58111700 | -1.22540200 | -0.24103600 |
| O | 0.61205100  | 0.98721900  | -0.25315700 |
| O | 1.23234200  | 1.62061000  | 2.40201000  |
| O | 2.24087400  | -0.69547200 | 1.55043000  |
| O | 0.46326900  | 3.35466800  | 1.22072300  |
| O | -5.80128100 | 1.11984900  | -0.95224200 |
| O | -5.43534400 | 0.89526500  | 2.00018700  |
| O | -3.55785400 | 1.94187900  | 0.31216400  |
| O | -4.00256300 | 2.81705000  | -2.28241200 |
| O | -3.43632500 | 2.57823100  | 2.95589100  |
| O | -2.63710200 | 0.24381000  | 4.02031700  |
| O | -1.84524300 | -1.29976600 | 2.01447000  |
| O | -1.39715200 | 1.13827300  | 1.45114100  |

|    |             |             |             |
|----|-------------|-------------|-------------|
| Zr | -2.36029900 | -2.32789200 | -0.04934000 |
| Zr | -0.33510500 | -0.12572300 | -2.08482200 |
| Zr | -3.76379400 | 0.58988000  | -1.45693600 |
| Zr | -3.32096500 | 0.45488100  | 2.05586800  |
| Zr | -1.27058400 | 2.64420600  | 0.05114400  |
| Zr | 0.10498900  | -0.30396900 | 1.47730300  |
| H  | 2.11309400  | -1.26288700 | -1.76939700 |
| Al | 5.66282100  | -2.08705100 | -1.68446000 |
| Al | 5.06769900  | 0.27803100  | -2.91321200 |
| Al | 3.63528000  | -0.73099000 | 0.17786900  |
| Al | 7.05187700  | 0.24419800  | -0.19047600 |
| Al | 4.73013500  | 2.08843900  | -1.00550000 |
| Al | 6.23542700  | -2.54949900 | 0.93943900  |
| Al | 4.85668400  | 1.85989500  | 1.68809900  |
| Al | 5.75953700  | -0.48280800 | 2.60294000  |
| H  | 2.88347900  | 1.10035300  | -2.22862800 |
| H  | 4.92526300  | -4.19094800 | -0.47627600 |
| H  | 9.13875600  | 1.28636100  | 0.18556200  |
| H  | 5.59319700  | -2.76144400 | 3.38907000  |
| H  | 1.87189900  | -2.51029600 | -0.11036700 |
| H  | 5.68051400  | 3.89875800  | 0.44403100  |
| H  | 4.66322900  | 3.94873800  | -2.76422700 |
| H  | 8.01557200  | -1.03147500 | 1.77250600  |
| H  | 4.44610900  | -1.96286400 | 4.11940600  |
| H  | 5.07375400  | 3.30766000  | 3.64117000  |
| H  | 7.29783600  | -0.96327100 | -3.03073000 |
| H  | 3.57374000  | -2.92863700 | -2.19239500 |
| H  | 6.59648100  | 1.34910100  | -4.41294000 |
| H  | 4.11137600  | -2.24624200 | -3.47898500 |
| H  | 3.88063600  | -0.42041800 | -4.90164600 |
| O  | 4.48205800  | -0.78115200 | -1.42916100 |
| O  | 3.69054600  | 1.61086600  | -2.39938700 |
| O  | 5.62549000  | -3.53740700 | -0.55521500 |
| O  | 8.77626000  | 0.42026600  | -0.00619800 |
| O  | 6.91656300  | -1.54500500 | -0.45527700 |
| O  | 6.16913300  | 1.13354800  | -1.45349800 |
| O  | 2.64192800  | -2.17240500 | -0.58512700 |
| O  | 6.01822000  | -3.83880000 | 2.17380900  |
| O  | 5.39301300  | 3.46799900  | -2.35403300 |
| O  | 4.81692000  | -1.49548300 | 1.32851400  |
| O  | 3.77547500  | 1.15620100  | 0.31298600  |
| O  | 4.97898000  | 3.24343800  | 0.38282600  |
| O  | 6.27553200  | 0.79590700  | 1.33835100  |
| O  | 7.29280400  | -1.52971100 | 2.18859300  |
| O  | 5.38689900  | -1.91438300 | 3.91114600  |
| O  | 4.24453000  | 0.59995900  | 2.96033300  |
| O  | 5.62137700  | 2.85447500  | 2.99693600  |
| O  | 6.63072400  | 0.61790800  | 3.98857300  |
| O  | 6.37079200  | -1.20603500 | -3.13208700 |
| O  | 5.70087300  | 1.49991900  | -4.10063700 |
| O  | 4.32611900  | -2.98627200 | -2.82677300 |
| O  | 3.83998600  | -0.67257000 | -3.97361600 |
| H  | 3.39976000  | 0.20852500  | 2.66010100  |

|    |             |             |             |
|----|-------------|-------------|-------------|
| H  | -4.86131400 | -4.26167500 | 3.64335800  |
| H  | -6.16776000 | -3.05104700 | 3.69332800  |
| H  | -6.00275700 | -4.18626500 | 2.30944300  |
| H  | -5.63589400 | -4.18089900 | -2.96240400 |
| H  | -6.65975200 | -3.78192500 | -1.59158000 |
| H  | -6.79189000 | -2.81331400 | -3.08716900 |
| H  | -3.73301700 | 5.49167300  | -3.33291500 |
| H  | -5.26717600 | 5.00478800  | -2.59961700 |
| H  | -4.07883800 | 5.99927000  | -1.67697100 |
| H  | -2.73453500 | 5.36240900  | 3.90124000  |
| H  | -3.86319300 | 5.68235700  | 2.59584200  |
| H  | -4.37181300 | 4.66197300  | 3.98638700  |
| H  | 5.65343600  | 2.80372500  | -3.09038800 |
| H  | 6.78959300  | -4.31393800 | 2.49243000  |
| H  | 3.08009600  | 3.90664800  | 1.73524800  |
| H  | 1.97808200  | 4.68259600  | 2.85810400  |
| H  | 2.89317800  | 3.23316500  | 3.39510500  |
| H  | 2.38508400  | 3.40896800  | -3.80481500 |
| H  | 1.10150000  | 4.65520500  | -3.75672500 |
| H  | 2.22277600  | 4.54226600  | -2.40890900 |
| H  | 1.04983100  | -4.80368500 | -2.88779100 |
| H  | -0.56959600 | -5.55047900 | -2.95365000 |
| H  | 0.00627600  | -4.45441100 | -4.25740500 |
| H  | 0.84155200  | -4.83857500 | 3.30271200  |
| H  | 0.06315100  | -5.80674800 | 2.00944600  |
| H  | 1.63274500  | -4.99259000 | 1.74252400  |
| H  | 7.58668200  | 0.62429800  | 3.85842200  |
| H  | 6.32387000  | 1.55882800  | 3.74742100  |
| H  | 2.44079700  | -0.54936500 | -3.16574300 |
| Ir | -6.89120900 | 1.81562100  | 0.71139300  |
| C  | -7.63797100 | 2.82973300  | 2.39863200  |
| C  | -8.26671500 | 1.57261100  | 2.25880300  |
| C  | -7.22473500 | 3.64943400  | -0.23125000 |
| C  | -6.22741500 | 4.65591600  | 0.29646700  |
| H  | -8.19636500 | 3.74542900  | 2.18019600  |
| H  | -6.82540900 | 2.95670800  | 3.12508300  |
| H  | -9.30472900 | 1.50603200  | 1.91964000  |
| H  | -7.96670700 | 0.72917400  | 2.89600500  |
| H  | -8.25157800 | 4.02565500  | -0.10908800 |
| H  | -7.07001400 | 3.47807400  | -1.30954000 |
| H  | -6.36905800 | 4.87538300  | 1.36446500  |
| H  | -6.31234200 | 5.61767900  | -0.23944400 |
| H  | -8.15704500 | 1.77317100  | -0.20114900 |
| H  | -5.17679500 | 4.34022600  | 0.17002200  |

**Ir(C<sub>2</sub>H<sub>5</sub>) H@Al<sub>8</sub>-NU-1000**

Electronic Energy: -7113.2106767

Enthalpy: -7112.146880

Free Energy: -7112.363541

|   |            |            |             |
|---|------------|------------|-------------|
| C | 1.68444400 | 3.94340200 | -3.15512400 |
|---|------------|------------|-------------|

|   |             |             |             |
|---|-------------|-------------|-------------|
| C | 0.64900600  | -4.90821500 | 2.22466000  |
| C | 2.37166400  | 3.70494300  | 2.55373900  |
| C | 0.00185900  | -4.64437600 | -3.17736700 |
| C | -5.46154800 | -3.56981600 | 3.03742900  |
| C | -4.20581200 | 5.17836300  | -2.39074400 |
| C | -6.09809700 | -3.34300200 | -2.42689500 |
| C | -3.54708600 | 4.91457200  | 3.31260500  |
| C | 1.27405300  | 2.82442400  | 2.03808100  |
| C | 0.75415000  | 3.00363900  | -2.46956000 |
| C | -3.54120500 | 3.93043200  | -1.89896900 |
| C | -5.03718800 | -2.44268600 | -1.88246900 |
| C | -4.54354100 | -2.62138500 | 2.33664000  |
| C | -0.02841400 | -3.67126600 | 1.74592500  |
| C | -3.03318400 | 3.71322200  | 2.58683000  |
| C | -0.52887500 | -3.45023500 | -2.44887700 |
| H | -1.87860800 | -1.87475900 | 2.77872400  |
| H | 1.50345800  | 1.36352000  | -0.23686400 |
| H | -3.67159900 | 1.60816800  | -3.98639300 |
| H | -2.58123300 | 0.45505100  | -3.98059900 |
| H | -2.88867600 | 0.95760500  | 4.60520600  |
| H | -6.42921500 | 0.32657300  | -1.44029200 |
| H | -5.87984600 | 0.18936700  | 2.43400700  |
| H | -2.58018400 | -1.61551400 | -2.86516400 |
| H | -4.15427500 | 2.70462900  | 0.42167800  |
| H | -0.51282300 | 0.66366400  | -4.56054000 |
| H | -1.06888600 | -0.03121400 | 3.98562800  |
| H | 0.40945400  | 0.54990400  | 4.03058700  |
| H | 2.25654100  | -1.60869000 | 1.87447100  |
| O | -1.76015100 | 1.26001600  | -1.40585200 |
| O | -2.55345100 | 4.06090000  | -1.12383200 |
| O | -2.25331800 | 3.92087200  | 1.60537700  |
| O | 0.11501400  | 3.45611300  | -1.47242800 |
| O | 0.64571400  | 1.82532000  | -2.90392100 |
| O | 1.81568500  | -0.50640100 | -2.37141100 |
| O | -0.05135300 | -2.32831100 | -2.75683900 |
| O | 0.54373900  | -2.56704900 | 2.00004400  |
| O | -1.42206200 | -3.63367200 | -1.56487900 |
| O | -1.11171500 | -3.77643200 | 1.11088200  |
| O | -4.11509000 | -3.00008400 | -1.22467900 |
| O | -3.78930400 | -3.12130500 | 1.44782900  |
| O | -4.54525900 | -1.41253300 | 2.67958500  |
| O | -5.10399100 | -1.19681900 | -2.10708100 |
| O | -3.45299800 | -0.56727500 | 0.17956900  |
| O | -2.38451100 | -1.09843400 | -2.07712400 |
| O | -1.03929300 | 0.05255900  | -4.03237000 |
| O | -3.54683400 | 0.68033700  | -3.74391200 |
| O | -0.09308500 | -0.23326600 | 3.76426200  |
| O | -0.58330500 | -1.21971800 | -0.24135900 |
| O | 0.60626200  | 0.99215700  | -0.25150500 |
| O | 1.23069100  | 1.62090700  | 2.40057800  |
| O | 2.22912800  | -0.69342100 | 1.55142400  |
| O | 0.46025400  | 3.35757100  | 1.22447800  |
| O | -5.87481600 | 0.99571600  | -1.01415900 |



|    |             |             |             |
|----|-------------|-------------|-------------|
| O  | -5.41930500 | 0.94392700  | 2.04766300  |
| O  | -3.56976600 | 1.95009600  | 0.30154500  |
| O  | -4.03764900 | 2.81373500  | -2.24108800 |
| O  | -3.42465500 | 2.58086400  | 2.96329900  |
| O  | -2.63878500 | 0.23270600  | 4.02202400  |
| O  | -1.85592500 | -1.29411800 | 2.01145400  |
| O  | -1.40713800 | 1.14669200  | 1.44861900  |
| Zr | -2.35771200 | -2.31866500 | -0.04339500 |
| Zr | -0.32735200 | -0.12566600 | -2.08514700 |
| Zr | -3.74540700 | 0.59425400  | -1.46494800 |
| Zr | -3.35480900 | 0.46826900  | 2.07115900  |
| Zr | -1.26836900 | 2.64383800  | 0.05643500  |
| Zr | 0.09261300  | -0.29508900 | 1.48482300  |
| H  | 2.11523100  | -1.26309800 | -1.76476400 |
| Al | 5.65844300  | -2.09000600 | -1.67199700 |
| Al | 5.07256400  | 0.27783100  | -2.89960300 |
| Al | 3.62853800  | -0.73100200 | 0.18604300  |
| Al | 7.04880400  | 0.23605000  | -0.17202100 |
| Al | 4.73358500  | 2.08738400  | -0.99157900 |
| Al | 6.22145000  | -2.55720200 | 0.95302500  |
| Al | 4.85280000  | 1.85517200  | 1.70205600  |
| Al | 5.74611400  | -0.49101800 | 2.61729800  |
| H  | 2.88800900  | 1.10377500  | -2.21898800 |
| H  | 4.91143100  | -4.19331700 | -0.46818400 |
| H  | 9.13768800  | 1.27308800  | 0.20851900  |
| H  | 5.57078400  | -2.77010800 | 3.40051400  |
| H  | 1.86305700  | -2.50698500 | -0.10922000 |
| H  | 5.68668100  | 3.89261200  | 0.46238000  |
| H  | 4.67687100  | 3.95093400  | -2.74813800 |
| H  | 8.00336900  | -1.04541400 | 1.79345800  |
| H  | 4.42371900  | -1.96900900 | 4.12808500  |
| H  | 5.07084000  | 3.30273400  | 3.65663100  |
| H  | 7.29953400  | -0.96882500 | -3.01398100 |
| H  | 3.56987700  | -2.92830500 | -2.18818100 |
| H  | 6.60606100  | 1.34755700  | -4.39567700 |
| H  | 4.11240300  | -2.24470600 | -3.47210300 |
| H  | 3.88608900  | -0.41303700 | -4.89161600 |
| O  | 4.47916700  | -0.78203500 | -1.41926100 |
| O  | 3.69568600  | 1.61343700  | -2.38844600 |
| O  | 5.61360100  | -3.54157400 | -0.54469800 |
| O  | 8.77300200  | 0.40819500  | 0.01554400  |
| O  | 6.90945800  | -1.55256000 | -0.43876900 |
| O  | 6.17093000  | 1.12863000  | -1.43661200 |
| O  | 2.63575600  | -2.17180600 | -0.58161100 |
| O  | 5.99619000  | -3.84737600 | 2.18493100  |
| O  | 5.40318200  | 3.46600100  | -2.33675700 |
| O  | 4.80490600  | -1.49955800 | 1.33876100  |
| O  | 3.77315600  | 1.15617200  | 0.32296100  |
| O  | 4.98290900  | 3.23991600  | 0.39862100  |
| O  | 6.26950500  | 0.78757700  | 1.35524100  |
| O  | 7.27768400  | -1.54193400 | 2.20638800  |
| O  | 5.36525600  | -1.92294000 | 3.92261400  |
| O  | 4.23282600  | 0.59552400  | 2.97060700  |

|    |             |             |             |
|----|-------------|-------------|-------------|
| O  | 5.61717100  | 2.84578900  | 3.01399500  |
| O  | 6.61574400  | 0.60540800  | 4.00677300  |
| O  | 6.37195300  | -1.20885200 | -3.11693100 |
| O  | 5.71026900  | 1.49965500  | -4.08450500 |
| O  | 4.32400000  | -2.98569900 | -2.82036900 |
| O  | 3.84427700  | -0.66811900 | -3.96441600 |
| H  | 3.38792400  | 0.20689800  | 2.66711000  |
| H  | -4.86346800 | -4.30025000 | 3.59804800  |
| H  | -6.13556400 | -3.05517800 | 3.72910000  |
| H  | -6.04074400 | -4.14560700 | 2.30480000  |
| H  | -5.63328900 | -4.16208600 | -2.98890300 |
| H  | -6.63892000 | -3.81015000 | -1.59329500 |
| H  | -6.80831700 | -2.80982200 | -3.06658500 |
| H  | -3.46083500 | 5.94443500  | -2.63608600 |
| H  | -4.85686000 | 4.98679000  | -3.24973900 |
| H  | -4.82217100 | 5.58941800  | -1.57940800 |
| H  | -2.79677700 | 5.71237400  | 3.34173500  |
| H  | -4.41333700 | 5.31012200  | 2.76261900  |
| H  | -3.88311400 | 4.66186500  | 4.32345200  |
| H  | 5.66343000  | 2.80219800  | -3.07373100 |
| H  | 6.76463000  | -4.32619900 | 2.50511000  |
| H  | 3.07807200  | 3.91084600  | 1.73463800  |
| H  | 1.97661800  | 4.68044400  | 2.86295300  |
| H  | 2.89560300  | 3.23105800  | 3.39240600  |
| H  | 2.38794500  | 3.40869100  | -3.80148800 |
| H  | 1.10204200  | 4.65236800  | -3.76061200 |
| H  | 2.21961100  | 4.54512700  | -2.40901400 |
| H  | 1.05073500  | -4.80185000 | -2.89027900 |
| H  | -0.56794500 | -5.55103400 | -2.95170700 |
| H  | 0.00328300  | -4.45508100 | -4.25753100 |
| H  | 0.81601400  | -4.84852600 | 3.30763800  |
| H  | 0.07460900  | -5.80874500 | 1.98806900  |
| H  | 1.64424900  | -4.97956300 | 1.76471600  |
| H  | 7.57236600  | 0.60853100  | 3.88153600  |
| H  | 6.31311600  | 1.54770700  | 3.76567700  |
| H  | 2.44894900  | -0.54566000 | -3.16004700 |
| Ir | -6.83649200 | 1.82216600  | 0.50951300  |
| C  | -8.13846500 | 2.76339600  | -0.74551400 |
| C  | -7.41893300 | 3.91798800  | -1.42117900 |
| H  | -9.00250000 | 3.13480700  | -0.15707200 |
| H  | -8.56457300 | 2.08910600  | -1.51181500 |
| H  | -6.96982400 | 4.61500700  | -0.69025700 |
| H  | -8.08640100 | 4.53383100  | -2.04864000 |
| H  | -7.77093700 | 0.63761200  | 0.86856000  |
| H  | -6.60672800 | 3.55891700  | -2.07224600 |

### TS2@Al<sub>8</sub>-NU-1000

Electronic Energy: -7191.8130521

Enthalpy: -7190.692261

Free Energy: -7190.911325

|   |             |             |             |
|---|-------------|-------------|-------------|
| C | 1.68444800  | 3.94340000  | -3.15512100 |
| C | 0.64900500  | -4.90821400 | 2.22466400  |
| C | 2.37166400  | 3.70494700  | 2.55373300  |
| C | 0.00185700  | -4.64437500 | -3.17737100 |
| C | -5.46152300 | -3.56982200 | 3.03745400  |
| C | -4.20580500 | 5.17837200  | -2.39073100 |
| C | -6.09808300 | -3.34300800 | -2.42691100 |
| C | -3.54710600 | 4.91457500  | 3.31258600  |
| C | 1.27405600  | 2.82442600  | 2.03808400  |
| C | 0.75414900  | 3.00362100  | -2.46954200 |
| C | -3.54119800 | 3.93046700  | -1.89895400 |
| C | -5.03723600 | -2.44266000 | -1.88258800 |
| C | -4.54349000 | -2.62143200 | 2.33674400  |
| C | -0.02842600 | -3.67127100 | 1.74594700  |
| C | -3.03319100 | 3.71324400  | 2.58679900  |
| C | -0.52889300 | -3.45025300 | -2.44888900 |
| H | -1.87801900 | -1.87318600 | 2.78284500  |
| H | 1.50984000  | 1.36184800  | -0.23478400 |
| H | -3.66110200 | 1.61442600  | -3.98166800 |
| H | -2.58001900 | 0.45483200  | -3.98211300 |
| H | -2.88959600 | 0.97619500  | 4.58256600  |
| H | -6.36096900 | 0.34350500  | -1.26039500 |
| H | -5.94479600 | 0.15700600  | 2.25932700  |
| H | -2.56978600 | -1.62035200 | -2.86808200 |
| H | -4.18510300 | 2.65146200  | 0.41814200  |
| H | -0.50682600 | 0.66020300  | -4.56328600 |
| H | -1.06477700 | -0.02913900 | 3.98075300  |
| H | 0.40885800  | 0.55711800  | 4.02212200  |
| H | 2.26720000  | -1.61160500 | 1.87932500  |
| O | -1.74950500 | 1.26131100  | -1.40711400 |
| O | -2.55584300 | 4.06430800  | -1.11876000 |
| O | -2.22218600 | 3.91709200  | 1.63489200  |
| O | 0.11411400  | 3.45719100  | -1.47363200 |
| O | 0.64876900  | 1.82503200  | -2.90324000 |
| O | 1.81794600  | -0.50679700 | -2.37282100 |
| O | -0.05039300 | -2.32918200 | -2.75551800 |
| O | 0.54502100  | -2.56756800 | 2.00102100  |
| O | -1.42306400 | -3.63566900 | -1.56629900 |
| O | -1.11011100 | -3.77690800 | 1.10965200  |
| O | -4.11464200 | -3.00305700 | -1.22583900 |
| O | -3.77830800 | -3.12588900 | 1.46178700  |
| O | -4.56427600 | -1.40353200 | 2.65700800  |
| O | -5.11277900 | -1.19709300 | -2.09527400 |
| O | -3.44234000 | -0.57653200 | 0.17879000  |
| O | -2.38395100 | -1.10093800 | -2.07933500 |
| O | -1.03373800 | 0.04916600  | -4.03560800 |
| O | -3.54450800 | 0.68302200  | -3.74833300 |
| O | -0.09016800 | -0.23198500 | 3.76580200  |
| O | -0.57812800 | -1.22394500 | -0.24043800 |
| O | 0.61436300  | 0.98670400  | -0.24995600 |
| O | 1.23234700  | 1.62075700  | 2.40320400  |
| O | 2.23836700  | -0.69642800 | 1.55643800  |
| O | 0.46349500  | 3.35458500  | 1.22105900  |

|    |             |             |             |
|----|-------------|-------------|-------------|
| O  | -5.78523100 | 1.05665000  | -0.95679900 |
| O  | -5.45310600 | 0.92759700  | 1.94747900  |
| O  | -3.52044800 | 1.95489200  | 0.30049400  |
| O  | -4.02920800 | 2.81732800  | -2.25304500 |
| O  | -3.45800400 | 2.57985200  | 2.93956300  |
| O  | -2.64774400 | 0.24046100  | 4.00970000  |
| O  | -1.85254800 | -1.29481700 | 2.01401300  |
| O  | -1.39754000 | 1.13962800  | 1.45661000  |
| Zr | -2.35461700 | -2.32000600 | -0.04849800 |
| Zr | -0.32923800 | -0.12330800 | -2.08534300 |
| Zr | -3.75459600 | 0.59952700  | -1.46899700 |
| Zr | -3.33239100 | 0.46712000  | 2.04720200  |
| Zr | -1.27202900 | 2.64524000  | 0.05118500  |
| Zr | 0.10212600  | -0.30022100 | 1.48239600  |
| H  | 2.11741200  | -1.26234300 | -1.76634900 |
| Al | 5.66409900  | -2.08995900 | -1.67312400 |
| Al | 5.07478900  | 0.27650600  | -2.90159600 |
| Al | 3.63393300  | -0.73242900 | 0.18600900  |
| Al | 7.05299000  | 0.23829900  | -0.17513600 |
| Al | 4.73510800  | 2.08610800  | -0.99370200 |
| Al | 6.23051900  | -2.55505000 | 0.95147500  |
| Al | 4.85650700  | 1.85567200  | 1.70010200  |
| Al | 5.75413100  | -0.48874100 | 2.61520900  |
| H  | 2.88946300  | 1.10098800  | -2.22147200 |
| H  | 4.91966600  | -4.19254400 | -0.46747000 |
| H  | 9.14000100  | 1.27817400  | 0.20473000  |
| H  | 5.58226800  | -2.76760300 | 3.39941300  |
| H  | 1.86753200  | -2.50685900 | -0.10823000 |
| H  | 5.68680100  | 3.89382800  | 0.45853600  |
| H  | 4.67208600  | 3.94645000  | -2.75153300 |
| H  | 8.01105700  | -1.04035500 | 1.78927600  |
| H  | 4.43430500  | -1.96744400 | 4.12630200  |
| H  | 5.07073800  | 3.30039000  | 3.65527600  |
| H  | 7.30386000  | -0.96731100 | -3.01390600 |
| H  | 3.57529400  | -2.92905500 | -2.18730300 |
| H  | 6.60911500  | 1.34719800  | -4.39540600 |
| H  | 4.11719500  | -2.24606100 | -3.47186700 |
| H  | 3.89358000  | -0.41907100 | -4.89404300 |
| O  | 4.48434500  | -0.78299300 | -1.41963800 |
| O  | 3.69771200  | 1.61035800  | -2.39008200 |
| O  | 5.62201400  | -3.54110300 | -0.54499000 |
| O  | 8.77740900  | 0.41242800  | 0.01155300  |
| O  | 6.91632600  | -1.55072200 | -0.44122000 |
| O  | 6.17396700  | 1.12968500  | -1.43942900 |
| O  | 2.64090400  | -2.17234400 | -0.57995500 |
| O  | 6.00924900  | -3.84518600 | 2.18438400  |
| O  | 5.40145900  | 3.46590300  | -2.34033300 |
| O  | 4.81317800  | -1.49913600 | 1.33796200  |
| O  | 3.77748400  | 1.15443400  | 0.32238000  |
| O  | 4.98441600  | 3.23961300  | 0.39572000  |
| O  | 6.27506900  | 0.79008900  | 1.35275000  |
| O  | 7.28690300  | -1.53793300 | 2.20368200  |
| O  | 5.37599200  | -1.92070100 | 3.92162500  |

|    |             |             |             |
|----|-------------|-------------|-------------|
| O  | 4.24026700  | 0.59574800  | 2.97023200  |
| O  | 5.61977600  | 2.84834900  | 3.01140900  |
| O  | 6.62442100  | 0.60970600  | 4.00336400  |
| O  | 6.37690700  | -1.20906600 | -3.11852200 |
| O  | 5.71220300  | 1.49836100  | -4.08701200 |
| O  | 4.32928300  | -2.98691700 | -2.81966300 |
| O  | 3.84948800  | -0.67209100 | -3.96641400 |
| H  | 3.39533700  | 0.20581700  | 2.66821000  |
| H  | -4.86446200 | -4.29534000 | 3.60536100  |
| H  | -6.14296800 | -3.05582000 | 3.72252000  |
| H  | -6.03256100 | -4.15140300 | 2.30296200  |
| H  | -5.63528200 | -4.16575000 | -2.98524900 |
| H  | -6.64172400 | -3.80598400 | -1.59266400 |
| H  | -6.80594700 | -2.80987200 | -3.06938000 |
| H  | -3.48099000 | 5.98982000  | -2.51900600 |
| H  | -4.76054300 | 5.00534200  | -3.31903300 |
| H  | -4.92429900 | 5.50754800  | -1.62588600 |
| H  | -2.74145400 | 5.63689700  | 3.48973800  |
| H  | -4.28466000 | 5.42012200  | 2.67304800  |
| H  | -4.03390200 | 4.64620400  | 4.25588400  |
| H  | 5.66290800  | 2.80170300  | -3.07640500 |
| H  | 6.78001900  | -4.31984500 | 2.50517400  |
| H  | 3.08042400  | 3.90670400  | 1.73559600  |
| H  | 1.97788100  | 4.68243100  | 2.85836200  |
| H  | 2.89299300  | 3.23331400  | 3.39532000  |
| H  | 2.39058100  | 3.40808000  | -3.79818500 |
| H  | 1.10238300  | 4.64932200  | -3.76450600 |
| H  | 2.21645500  | 4.54856100  | -2.40948400 |
| H  | 1.05033800  | -4.80262500 | -2.88915700 |
| H  | -0.56858700 | -5.55097500 | -2.95294300 |
| H  | 0.00481800  | -4.45463500 | -4.25747100 |
| H  | 0.82757400  | -4.84431800 | 3.30551400  |
| H  | 0.06957400  | -5.80791500 | 1.99724000  |
| H  | 1.63913800  | -4.98529300 | 1.75459200  |
| H  | 7.58049100  | 0.61531700  | 3.87401800  |
| H  | 6.31884200  | 1.55110100  | 3.76220000  |
| H  | 2.44844300  | -0.54863200 | -3.16209900 |
| Ir | -6.61299300 | 2.14423000  | 0.67972500  |
| C  | -6.80182600 | 3.49708300  | 2.26804100  |
| C  | -7.86600300 | 2.56418300  | 2.28662700  |
| H  | -6.96292800 | 3.44069100  | -0.17725000 |
| H  | -5.95618200 | 3.35971000  | 2.95158500  |
| H  | -6.98534000 | 4.53709600  | 1.97362600  |
| H  | -7.84694600 | 1.73780700  | 3.00858900  |
| H  | -8.87897400 | 2.86730000  | 1.99387300  |
| C  | -8.17686700 | 2.88686500  | -0.66375100 |
| H  | -8.77037100 | 1.97617600  | -0.47003500 |
| H  | -8.77968400 | 3.71910200  | -0.26056500 |
| C  | -7.92801500 | 3.06298800  | -2.14820600 |
| H  | -8.87652900 | 3.05618800  | -2.70488700 |
| H  | -7.42283400 | 4.01219400  | -2.37650400 |
| H  | -7.29144000 | 2.26491600  | -2.55060800 |

**Ir(C<sub>2</sub>H<sub>6</sub>) (C<sub>2</sub>H<sub>4</sub>)@Al<sub>8</sub>-NU-1000**

Electronic Energy: -7191.8174964

Enthalpy: -7190.692828

Free Energy: -7190.912907

|   |             |             |             |
|---|-------------|-------------|-------------|
| C | 1.68444900  | 3.94340000  | -3.15512000 |
| C | 0.64900600  | -4.90821400 | 2.22466300  |
| C | 2.37166400  | 3.70494700  | 2.55373300  |
| C | 0.00185800  | -4.64437500 | -3.17737000 |
| C | -5.46151900 | -3.56982600 | 3.03745400  |
| C | -4.20580100 | 5.17837300  | -2.39073300 |
| C | -6.09808200 | -3.34301000 | -2.42691000 |
| C | -3.54710400 | 4.91457600  | 3.31258500  |
| C | 1.27405400  | 2.82442400  | 2.03808100  |
| C | 0.75414800  | 3.00361800  | -2.46954200 |
| C | -3.54119800 | 3.93047000  | -1.89898000 |
| C | -5.03724000 | -2.44265700 | -1.88260600 |
| C | -4.54348900 | -2.62143500 | 2.33676700  |
| C | -0.02842900 | -3.67126800 | 1.74594000  |
| C | -3.03319600 | 3.71324300  | 2.58682700  |
| C | -0.52889300 | -3.45025000 | -2.44888500 |
| H | -1.88192100 | -1.87178400 | 2.78190700  |
| H | 1.51133000  | 1.36084800  | -0.23400700 |
| H | -3.65954400 | 1.61105400  | -3.99088000 |
| H | -2.57307600 | 0.45547300  | -3.98434600 |
| H | -2.89398200 | 0.97228200  | 4.58104700  |
| H | -6.33419700 | 0.29771200  | -1.20468900 |
| H | -5.96891300 | 0.13832000  | 2.18203700  |
| H | -2.56957300 | -1.61944600 | -2.86887700 |
| H | -4.20064800 | 2.62893500  | 0.43505800  |
| H | -0.50092700 | 0.65916000  | -4.56290700 |
| H | -1.06508100 | -0.02998300 | 3.98013400  |
| H | 0.40743600  | 0.55815300  | 4.02113500  |
| H | 2.26896200  | -1.61210800 | 1.88089800  |
| O | -1.74793700 | 1.26180600  | -1.40703900 |
| O | -2.55473900 | 4.06702400  | -1.12099100 |
| O | -2.21984000 | 3.91771600  | 1.63709600  |
| O | 0.11377100  | 3.45729800  | -1.47387900 |
| O | 0.64968400  | 1.82483800  | -2.90275700 |
| O | 1.81900400  | -0.50684400 | -2.37246000 |
| O | -0.04927500 | -2.32938700 | -2.75450700 |
| O | 0.54486600  | -2.56740800 | 2.00179400  |
| O | -1.42410800 | -3.63524000 | -1.56720800 |
| O | -1.10939700 | -3.77650700 | 1.10866500  |
| O | -4.11535600 | -3.00358100 | -1.22466100 |
| O | -3.77446000 | -3.12754100 | 1.46612700  |
| O | -4.57151600 | -1.40017400 | 2.64646000  |
| O | -5.11183800 | -1.19767400 | -2.09578200 |
| O | -3.44782800 | -0.57714400 | 0.17705800  |
| O | -2.38372400 | -1.10013400 | -2.08001200 |

|    |             |             |             |
|----|-------------|-------------|-------------|
| O  | -1.02917000 | 0.04836400  | -4.03629600 |
| O  | -3.53849300 | 0.68180900  | -3.75192800 |
| O  | -0.09044800 | -0.23199700 | 3.76567800  |
| O  | -0.57905400 | -1.22382600 | -0.23998100 |
| O  | 0.61613700  | 0.98507800  | -0.24936100 |
| O  | 1.23255300  | 1.62073300  | 2.40348200  |
| O  | 2.23978800  | -0.69701700 | 1.55787000  |
| O  | 0.46352200  | 3.35412700  | 1.22081900  |
| O  | -5.78752900 | 1.06021600  | -0.97504400 |
| O  | -5.47067700 | 0.93219000  | 1.94684500  |
| O  | -3.51300600 | 1.95438700  | 0.29996600  |
| O  | -4.02622500 | 2.81659000  | -2.25379500 |
| O  | -3.45691800 | 2.57815800  | 2.93738100  |
| O  | -2.64944400 | 0.23844000  | 4.00681000  |
| O  | -1.85383000 | -1.29397200 | 2.01271000  |
| O  | -1.39629300 | 1.13821600  | 1.45762000  |
| Zr | -2.35609700 | -2.31921400 | -0.04916300 |
| Zr | -0.32839800 | -0.12318000 | -2.08448900 |
| Zr | -3.75490300 | 0.60213400  | -1.47411800 |
| Zr | -3.32851500 | 0.46893700  | 2.04357200  |
| Zr | -1.27344700 | 2.64677200  | 0.05105000  |
| Zr | 0.10386400  | -0.30157700 | 1.48229500  |
| H  | 2.11827000  | -1.26235100 | -1.76597800 |
| Al | 5.66557100  | -2.08949200 | -1.67265800 |
| Al | 5.07574500  | 0.27698900  | -2.90085700 |
| Al | 3.63515800  | -0.73265500 | 0.18675300  |
| Al | 7.05399200  | 0.23887300  | -0.17448300 |
| Al | 4.73555800  | 2.08613500  | -0.99269700 |
| Al | 6.23216400  | -2.55484400 | 0.95187500  |
| Al | 4.85735200  | 1.85564900  | 1.70111400  |
| Al | 5.75548600  | -0.48874100 | 2.61582800  |
| H  | 2.89006500  | 1.10087000  | -2.22075100 |
| H  | 4.92162700  | -4.19243300 | -0.46727600 |
| H  | 9.14064700  | 1.27925000  | 0.20546100  |
| H  | 5.58405200  | -2.76771800 | 3.39987300  |
| H  | 1.86902000  | -2.50767400 | -0.10738400 |
| H  | 5.68713000  | 3.89393200  | 0.45952300  |
| H  | 4.67204000  | 3.94675300  | -2.75032900 |
| H  | 8.01242800  | -1.03985200 | 1.78971900  |
| H  | 4.43615200  | -1.96779900 | 4.12722300  |
| H  | 5.07140500  | 3.30041000  | 3.65625100  |
| H  | 7.30519200  | -0.96631800 | -3.01294700 |
| H  | 3.57692300  | -2.92892000 | -2.18746200 |
| H  | 6.60989600  | 1.34832700  | -4.39426100 |
| H  | 4.11898900  | -2.24552300 | -3.47167200 |
| H  | 3.89530600  | -0.41880800 | -4.89358600 |
| O  | 4.48549300  | -0.78290400 | -1.41895400 |
| O  | 3.69827500  | 1.61041200  | -2.38914200 |
| O  | 5.62384200  | -3.54083600 | -0.54474300 |
| O  | 8.77840900  | 0.41341700  | 0.01199500  |
| O  | 6.91770700  | -1.55015500 | -0.44069100 |
| O  | 6.17467000  | 1.13015200  | -1.43865900 |
| O  | 2.64189700  | -2.17216800 | -0.57919100 |

|    |             |             |             |
|----|-------------|-------------|-------------|
| O  | 6.01105200  | -3.84511100 | 2.18462900  |
| O  | 5.40154600  | 3.46636600  | -2.33918300 |
| O  | 4.81461300  | -1.49925800 | 1.33855300  |
| O  | 3.77835600  | 1.15414500  | 0.32341200  |
| O  | 4.98485700  | 3.23958900  | 0.39678800  |
| O  | 6.27610600  | 0.79034800  | 1.35350500  |
| O  | 7.28842400  | -1.53763300 | 2.20413900  |
| O  | 5.37774400  | -1.92088800 | 3.92215700  |
| O  | 4.24154300  | 0.59544300  | 2.97114900  |
| O  | 5.62050100  | 2.84836800  | 3.01242900  |
| O  | 6.62572700  | 0.60977500  | 4.00398300  |
| O  | 6.37831700  | -1.20823500 | -3.11790900 |
| O  | 5.71284400  | 1.49922000  | -4.08613400 |
| O  | 4.33111100  | -2.98650300 | -2.81955900 |
| O  | 3.85095100  | -0.67179600 | -3.96596500 |
| H  | 3.39657600  | 0.20547300  | 2.66930800  |
| H  | -4.86662300 | -4.32117200 | 3.57265700  |
| H  | -6.11996000 | -3.05985800 | 3.74751500  |
| H  | -6.05959300 | -4.12140100 | 2.30101300  |
| H  | -5.63516800 | -4.16139300 | -2.99160700 |
| H  | -6.63680600 | -3.81222500 | -1.59301100 |
| H  | -6.80979900 | -2.80839000 | -3.06383600 |
| H  | -3.46740900 | 5.95851000  | -2.60804100 |
| H  | -4.83558700 | 4.98880200  | -3.26624400 |
| H  | -4.84611100 | 5.56676900  | -1.58510100 |
| H  | -2.73437200 | 5.62297600  | 3.51314500  |
| H  | -4.26251600 | 5.43713500  | 2.66201600  |
| H  | -4.05656900 | 4.64526700  | 4.24347500  |
| H  | 5.66312800  | 2.80232800  | -3.07537600 |
| H  | 6.78172700  | -4.32008200 | 2.50517700  |
| H  | 3.07992800  | 3.90759300  | 1.73539900  |
| H  | 1.97770700  | 4.68205700  | 2.85938600  |
| H  | 2.89352300  | 3.23287500  | 3.39474400  |
| H  | 2.39022500  | 3.40813400  | -3.79862600 |
| H  | 1.10253000  | 4.64995400  | -3.76391000 |
| H  | 2.21700200  | 4.54792600  | -2.40933900 |
| H  | 1.05061600  | -4.80215700 | -2.88993200 |
| H  | -0.56817700 | -5.55113900 | -2.95255700 |
| H  | 0.00398700  | -4.45478200 | -4.25751300 |
| H  | 0.82758800  | -4.84439400 | 3.30551100  |
| H  | 0.06955900  | -5.80788300 | 1.99714900  |
| H  | 1.63912200  | -4.98528100 | 1.75453900  |
| H  | 7.58178500  | 0.61556000  | 3.87457300  |
| H  | 6.31993000  | 1.55113200  | 3.76299900  |
| H  | 2.44933500  | -0.54876500 | -3.16172200 |
| Ir | -6.56358700 | 2.13358100  | 0.69635400  |
| C  | -6.71745500 | 3.53025400  | 2.23729800  |
| C  | -7.80936800 | 2.62579800  | 2.27974900  |
| C  | -8.00583900 | 3.32893200  | -0.87552300 |
| C  | -8.77944300 | 4.58923500  | -0.56779000 |
| H  | -6.86638300 | 4.56593300  | 1.90278500  |
| H  | -5.89319600 | 3.40237000  | 2.94833200  |
| H  | -8.81638200 | 2.94353400  | 1.97750000  |



|   |             |            |             |
|---|-------------|------------|-------------|
| H | -7.81809700 | 1.83066100 | 3.03665000  |
| H | -8.53041800 | 2.42236100 | -0.53825700 |
| H | -7.79454100 | 3.18768600 | -1.94532500 |
| H | -8.96873200 | 4.70262000 | 0.50844900  |
| H | -9.75704100 | 4.58529100 | -1.06895800 |
| H | -8.24745200 | 5.49125500 | -0.90174700 |
| H | -6.93188200 | 3.47603300 | -0.46951600 |

### Catalytic Dimerization Mechanism (Figure 4)

#### TS1@Al<sub>8</sub>-NU-1000

Electronic Energy: -7191.7561133

Enthalpy: -7190.637128

Free Energy: -7190.852746

|   |             |             |             |
|---|-------------|-------------|-------------|
| C | 1.68444600  | 3.94340500  | -3.15511700 |
| C | 0.64900300  | -4.90821400 | 2.22466700  |
| C | 2.37165800  | 3.70495200  | 2.55373700  |
| C | 0.00184800  | -4.64437300 | -3.17738100 |
| C | -5.46152000 | -3.56981800 | 3.03746300  |
| C | -4.20580200 | 5.17836900  | -2.39074400 |
| C | -6.09811400 | -3.34297900 | -2.42689700 |
| C | -3.54715000 | 4.91456600  | 3.31257000  |
| C | 1.27404700  | 2.82442600  | 2.03808500  |
| C | 0.75415500  | 3.00363900  | -2.46956500 |
| C | -3.54109900 | 3.93049500  | -1.89882300 |
| C | -5.03720900 | -2.44261100 | -1.88241600 |
| C | -4.54347600 | -2.62148200 | 2.33667600  |
| C | -0.02841200 | -3.67131200 | 1.74597200  |
| C | -3.03325900 | 3.71320700  | 2.58661400  |
| C | -0.52888900 | -3.45025300 | -2.44893800 |
| H | -1.90107800 | -1.88795900 | 2.76651200  |
| H | 1.49054900  | 1.36807000  | -0.23540900 |
| H | -3.65220400 | 1.60919300  | -3.99089300 |
| H | -2.57730500 | 0.44642000  | -3.97929800 |
| H | -2.87723900 | 0.97841900  | 4.58101400  |
| H | -5.96177100 | 2.06855000  | -1.41243100 |
| H | -5.47041800 | 1.92444900  | 2.51834100  |
| H | -2.59304300 | -1.63610200 | -2.84825300 |
| H | -4.22210100 | 2.57932700  | 0.40659800  |
| H | -0.50737300 | 0.65043600  | -4.56626200 |
| H | -1.06802300 | -0.03748100 | 3.97814800  |
| H | 0.40567100  | 0.54889400  | 4.01828000  |
| H | 2.26350000  | -1.60938200 | 1.87338700  |
| O | -1.76453200 | 1.25346800  | -1.41448300 |
| O | -2.55384200 | 4.05643600  | -1.12449100 |
| O | -2.21787800 | 3.90590300  | 1.64176800  |
| O | 0.11317300  | 3.45541500  | -1.47294200 |
| O | 0.64532800  | 1.82565100  | -2.90464700 |
| O | 1.81231400  | -0.50248900 | -2.36333200 |
| O | -0.04666100 | -2.32944100 | -2.74932000 |

|    |             |             |             |
|----|-------------|-------------|-------------|
| O  | 0.54422200  | -2.56695500 | 2.00049500  |
| O  | -1.42385700 | -3.63736100 | -1.56635700 |
| O  | -1.10983100 | -3.77732000 | 1.10821400  |
| O  | -4.12828800 | -3.00945800 | -1.20391600 |
| O  | -3.78970800 | -3.13149400 | 1.45259800  |
| O  | -4.54574500 | -1.41085700 | 2.67066000  |
| O  | -5.08469900 | -1.20718200 | -2.12461100 |
| O  | -3.52614200 | -0.58751900 | 0.18686100  |
| O  | -2.38714100 | -1.11206700 | -2.06764000 |
| O  | -1.03304600 | 0.03797100  | -4.03895800 |
| O  | -3.54003700 | 0.68043700  | -3.74737700 |
| O  | -0.09288700 | -0.24132400 | 3.76396200  |
| O  | -0.59641700 | -1.21953400 | -0.23784000 |
| O  | 0.59634000  | 0.99003800  | -0.24849800 |
| O  | 1.22954600  | 1.62114600  | 2.40579500  |
| O  | 2.23232200  | -0.69439400 | 1.55022700  |
| O  | 0.46225600  | 3.35192700  | 1.22015600  |
| O  | -5.78488800 | 1.18493700  | -1.07298500 |
| O  | -5.42680900 | 1.06862500  | 2.07651200  |
| O  | -3.50207000 | 1.95167800  | 0.29839400  |
| O  | -4.04064300 | 2.82159800  | -2.25688300 |
| O  | -3.47550100 | 2.58548800  | 2.94590400  |
| O  | -2.64195900 | 0.24286800  | 4.00563900  |
| O  | -1.86286600 | -1.30409400 | 2.00249200  |
| O  | -1.40903600 | 1.12929200  | 1.46167700  |
| Zr | -2.36873900 | -2.32294400 | -0.05099900 |
| Zr | -0.33942700 | -0.12721500 | -2.08767700 |
| Zr | -3.78358700 | 0.59356600  | -1.47087100 |
| Zr | -3.35014300 | 0.45593800  | 2.05047600  |
| Zr | -1.27297000 | 2.62816400  | 0.04726300  |
| Zr | 0.09459500  | -0.30569700 | 1.48398000  |
| H  | 2.11125200  | -1.26192200 | -1.76156100 |
| Al | 5.65868400  | -2.08623100 | -1.67713700 |
| Al | 5.06798400  | 0.28147600  | -2.90309500 |
| Al | 3.63059400  | -0.73031800 | 0.18390000  |
| Al | 7.04892900  | 0.24042700  | -0.17760300 |
| Al | 4.73126800  | 2.08946900  | -0.99303900 |
| Al | 6.22568500  | -2.55388800 | 0.94719300  |
| Al | 4.85406800  | 1.85649700  | 1.70011500  |
| Al | 5.75092300  | -0.48903600 | 2.61313500  |
| H  | 2.88464900  | 1.10522000  | -2.21801200 |
| H  | 4.91314800  | -4.18851000 | -0.47209900 |
| H  | 9.13677200  | 1.27920300  | 0.20153200  |
| H  | 5.57878100  | -2.76845800 | 3.39544800  |
| H  | 1.87231200  | -2.51628500 | -0.10626600 |
| H  | 5.68536100  | 3.89514600  | 0.45991600  |
| H  | 4.66721600  | 3.95181600  | -2.74910000 |
| H  | 8.00721700  | -1.04078300 | 1.78564900  |
| H  | 4.43169100  | -1.96861900 | 4.12425600  |
| H  | 5.07007900  | 3.30027000  | 3.65622300  |
| H  | 7.29698800  | -0.96091000 | -3.01870600 |
| H  | 3.57082000  | -2.92903900 | -2.19316900 |
| H  | 6.59952300  | 1.35279700  | -4.39966800 |

|   |             |             |             |
|---|-------------|-------------|-------------|
| H | 4.11130300  | -2.24013600 | -3.47528100 |
| H | 3.87961700  | -0.41096600 | -4.89292400 |
| O | 4.47913800  | -0.77927000 | -1.42166200 |
| O | 3.69205600  | 1.61521900  | -2.38852600 |
| O | 5.61660200  | -3.53828900 | -0.54984300 |
| O | 8.77343600  | 0.41379600  | 0.00826200  |
| O | 6.91110400  | -1.54828500 | -0.44487800 |
| O | 6.16934700  | 1.13305400  | -1.44065500 |
| O | 2.64119300  | -2.17573800 | -0.58082600 |
| O | 6.00370500  | -3.84483700 | 2.17922300  |
| O | 5.39656100  | 3.47023400  | -2.33908300 |
| O | 4.80879200  | -1.49785700 | 1.33596700  |
| O | 3.77423300  | 1.15680300  | 0.32257900  |
| O | 4.98221900  | 3.24173300  | 0.39713000  |
| O | 6.27193300  | 0.79059500  | 1.35151500  |
| O | 7.28305900  | -1.53848100 | 2.19989000  |
| O | 5.37316500  | -1.92194600 | 3.91865300  |
| O | 4.23706600  | 0.59575100  | 2.96940300  |
| O | 5.61830400  | 2.84747700  | 3.01221200  |
| O | 6.62166300  | 0.60787300  | 4.00193900  |
| O | 6.37005100  | -1.20318800 | -3.12213600 |
| O | 5.70385800  | 1.50448200  | -4.08794600 |
| O | 4.32558100  | -2.98206800 | -2.82496900 |
| O | 3.83976100  | -0.66584600 | -3.96561100 |
| H | 3.39176600  | 0.20749600  | 2.66672500  |
| H | -4.86227600 | -4.25795200 | 3.64899300  |
| H | -6.17453300 | -3.05677200 | 3.69145800  |
| H | -5.99186700 | -4.19581900 | 2.30849500  |
| H | -5.63543500 | -4.11767500 | -3.05148300 |
| H | -6.59052400 | -3.87069300 | -1.59927300 |
| H | -6.84509900 | -2.79721300 | -3.01241200 |
| H | -5.00190000 | 5.45023500  | -1.68247300 |
| H | -3.50348400 | 6.01759200  | -2.42976100 |
| H | -4.67791700 | 5.02493900  | -3.36718500 |
| H | -2.80414300 | 5.71917800  | 3.32685400  |
| H | -4.42664000 | 5.29922700  | 2.77593300  |
| H | -3.86423300 | 4.66613400  | 4.33098300  |
| H | 5.65698500  | 2.80674400  | -3.07616800 |
| H | 6.77375500  | -4.32173700 | 2.49841400  |
| H | 3.07995500  | 3.90842000  | 1.73566700  |
| H | 1.97729800  | 4.68174100  | 2.85990300  |
| H | 2.89330700  | 3.23245600  | 3.39459800  |
| H | 2.39005800  | 3.40798300  | -3.79858500 |
| H | 1.10195400  | 4.64936000  | -3.76405800 |
| H | 2.21693500  | 4.54842700  | -2.40969500 |
| H | 1.01131700  | -4.86689900 | -2.80342700 |
| H | -0.62584400 | -5.52850400 | -3.02790000 |
| H | 0.10669200  | -4.42300200 | -4.24578400 |
| H | 0.83481100  | -4.84176000 | 3.30410800  |
| H | 0.06625000  | -5.80710500 | 2.00275900  |
| H | 1.63592400  | -4.98881700 | 1.74832900  |
| H | 7.57778200  | 0.61281100  | 3.87290900  |
| H | 6.31677000  | 1.54972800  | 3.76154800  |

|    |             |             |             |
|----|-------------|-------------|-------------|
| H  | 2.44071100  | -0.54352700 | -3.15436100 |
| Ir | -7.16436500 | 0.93184200  | 0.71055500  |
| C  | -7.81467400 | -0.63232100 | -0.49383100 |
| C  | -8.21394000 | 0.68116600  | 2.45225600  |
| C  | -7.05507900 | -1.33102600 | 0.53684700  |
| H  | -8.88987200 | -0.84147600 | -0.53344900 |
| H  | -7.34731200 | -0.49807900 | -1.47399900 |
| C  | -7.74378600 | -0.69127500 | 2.27784800  |
| H  | -7.74532000 | 1.24573000  | 3.26824600  |
| H  | -9.29753900 | 0.83922400  | 2.41069000  |
| H  | -7.41381200 | -2.31372800 | 0.85086900  |
| H  | -5.96365700 | -1.36131600 | 0.40481600  |
| H  | -6.88450600 | -0.99535300 | 2.88317200  |
| H  | -8.54133300 | -1.43826900 | 2.24380700  |
| H  | -8.49005800 | 1.38184700  | -0.00200800 |
| H  | -7.17019400 | 2.54121500  | 0.59080500  |

### **Ir(C<sub>4</sub>H<sub>8</sub>) H<sub>2</sub>@Al<sub>8</sub>-NU-1000**

Electronic Energy: -7191.7981736

Enthalpy: -7190.676452

Free Energy: -7190.894958

|   |             |             |             |
|---|-------------|-------------|-------------|
| C | 1.68445400  | 3.94340300  | -3.15511000 |
| C | 0.64900700  | -4.90821400 | 2.22466200  |
| C | 2.37166400  | 3.70494700  | 2.55373300  |
| C | 0.00185300  | -4.64437900 | -3.17736800 |
| C | -5.46149600 | -3.56986200 | 3.03743500  |
| C | -4.20578100 | 5.17838500  | -2.39073000 |
| C | -6.09806700 | -3.34303300 | -2.42690200 |
| C | -3.54711500 | 4.91460000  | 3.31253800  |
| C | 1.27403400  | 2.82441500  | 2.03809400  |
| C | 0.75415700  | 3.00361600  | -2.46956800 |
| C | -3.54111400 | 3.93052500  | -1.89911800 |
| C | -5.03730900 | -2.44266800 | -1.88269600 |
| C | -4.54348900 | -2.62149900 | 2.33699700  |
| C | -0.02843500 | -3.67126400 | 1.74592900  |
| C | -3.03324000 | 3.71326100  | 2.58696800  |
| C | -0.52889400 | -3.45021500 | -2.44896000 |
| H | -1.88443900 | -1.88093100 | 2.77988800  |
| H | 1.50323700  | 1.36185400  | -0.23617400 |
| H | -3.65123900 | 1.62190200  | -3.95678100 |
| H | -2.59070900 | 0.44667600  | -3.97603200 |
| H | -2.84217900 | 1.03769100  | 4.54074900  |
| H | -6.41882400 | 0.84411400  | -1.62943800 |
| H | -5.87032500 | 0.82179800  | 2.84090200  |
| H | -2.58009000 | -1.62719500 | -2.85883700 |
| H | -4.20085600 | 2.64740300  | 0.39749500  |
| H | -0.51822500 | 0.66065900  | -4.56110600 |
| H | -1.06626900 | -0.03642300 | 3.97830000  |
| H | 0.40407100  | 0.55505300  | 4.02025800  |
| H | 2.26807000  | -1.61027800 | 1.87733400  |

|    |             |             |             |
|----|-------------|-------------|-------------|
| O  | -1.76033600 | 1.25588400  | -1.40024100 |
| O  | -2.56607100 | 4.06153300  | -1.10370900 |
| O  | -2.23181100 | 3.91519800  | 1.62635400  |
| O  | 0.11168200  | 3.45710800  | -1.47419900 |
| O  | 0.64607600  | 1.82529300  | -2.90294100 |
| O  | 1.81253300  | -0.50617000 | -2.36900800 |
| O  | -0.05146100 | -2.32872900 | -2.75493600 |
| O  | 0.54653100  | -2.56767800 | 1.99812200  |
| O  | -1.42178700 | -3.63779300 | -1.56512500 |
| O  | -1.11122700 | -3.77804900 | 1.11164600  |
| O  | -4.11926200 | -3.00450700 | -1.21739000 |
| O  | -3.79241300 | -3.12567500 | 1.44530100  |
| O  | -4.52744000 | -1.41381100 | 2.68604800  |
| O  | -5.09607500 | -1.20167500 | -2.11664300 |
| O  | -3.45772700 | -0.57951100 | 0.18462600  |
| O  | -2.38462300 | -1.10631100 | -2.07343900 |
| O  | -1.04218000 | 0.04801800  | -4.03234400 |
| O  | -3.55279700 | 0.68360300  | -3.74144300 |
| O  | -0.09266000 | -0.23580000 | 3.76440700  |
| O  | -0.58481600 | -1.22493500 | -0.23887300 |
| O  | 0.60747400  | 0.98729300  | -0.24970000 |
| O  | 1.22987900  | 1.62110000  | 2.40463400  |
| O  | 2.23673000  | -0.69535000 | 1.55403100  |
| O  | 0.46224200  | 3.35354600  | 1.22087600  |
| O  | -5.79469900 | 1.08786000  | -0.93584900 |
| O  | -5.46819600 | 0.97114100  | 1.97559300  |
| O  | -3.55078200 | 1.94011400  | 0.30564300  |
| O  | -4.01412600 | 2.81704300  | -2.26914600 |
| O  | -3.44322200 | 2.57861100  | 2.95281100  |
| O  | -2.65695200 | 0.25377800  | 4.01164900  |
| O  | -1.85002500 | -1.30028700 | 2.01319600  |
| O  | -1.40561500 | 1.13533000  | 1.45443900  |
| Zr | -2.36343000 | -2.33061400 | -0.04786500 |
| Zr | -0.33618200 | -0.12571100 | -2.08372100 |
| Zr | -3.76820000 | 0.58708700  | -1.46143000 |
| Zr | -3.33069000 | 0.45519000  | 2.04433100  |
| Zr | -1.27511400 | 2.64272300  | 0.04914400  |
| Zr | 0.10072500  | -0.30510100 | 1.47922200  |
| H  | 2.11201100  | -1.26301300 | -1.76424100 |
| Al | 5.66081600  | -2.08872700 | -1.67744200 |
| Al | 5.06816800  | 0.27685600  | -2.90657900 |
| Al | 3.63289700  | -0.73139000 | 0.18331400  |
| Al | 7.05037300  | 0.24124500  | -0.18225300 |
| Al | 4.73057800  | 2.08717800  | -0.99886700 |
| Al | 6.23059000  | -2.55206000 | 0.94699100  |
| Al | 4.85523000  | 1.85846700  | 1.69479000  |
| Al | 5.75514700  | -0.48507800 | 2.61022900  |
| H  | 2.88388600  | 1.10080300  | -2.22327800 |
| H  | 4.91972100  | -4.19155600 | -0.46982100 |
| H  | 9.13758100  | 1.28190100  | 0.19530000  |
| H  | 5.58598200  | -2.76359900 | 3.39611100  |
| H  | 1.87017900  | -2.51186800 | -0.10615600 |
| H  | 5.68234900  | 3.89643600  | 0.45106000  |

|   |             |             |             |
|---|-------------|-------------|-------------|
| H | 4.66555200  | 3.94766100  | -2.75750500 |
| H | 8.01128200  | -1.03570800 | 1.78162700  |
| H | 4.43894200  | -1.96388100 | 4.12521400  |
| H | 5.07173000  | 3.30499600  | 3.64872000  |
| H | 7.29772400  | -0.96580300 | -3.02218400 |
| H | 3.57176400  | -2.92933000 | -2.18743100 |
| H | 6.59885400  | 1.34704000  | -4.40483400 |
| H | 4.11084400  | -2.24672300 | -3.47335000 |
| H | 3.88184200  | -0.42034500 | -4.89573700 |
| O | 4.48084200  | -0.78198300 | -1.42295000 |
| O | 3.69159700  | 1.61049400  | -2.39347600 |
| O | 5.62112500  | -3.53920400 | -0.54823700 |
| O | 8.77481000  | 0.41600900  | 0.00312700  |
| O | 6.91388200  | -1.54792100 | -0.44704900 |
| O | 6.16934200  | 1.13144500  | -1.44591600 |
| O | 2.64044700  | -2.17357800 | -0.58017100 |
| O | 6.01113800  | -3.84133500 | 2.18106300  |
| O | 5.39482400  | 3.46660500  | -2.34674400 |
| O | 4.81275800  | -1.49686200 | 1.33509100  |
| O | 3.77457600  | 1.15567000  | 0.31898400  |
| O | 4.98023000  | 3.24177400  | 0.38964800  |
| O | 6.27350300  | 0.79321500  | 1.34622800  |
| O | 7.28789000  | -1.53346600 | 2.19719100  |
| O | 5.38003800  | -1.91641400 | 3.91810600  |
| O | 4.24078200  | 0.59894100  | 2.96641300  |
| O | 5.61970800  | 2.85217500  | 3.00451700  |
| O | 6.62625800  | 0.61471800  | 3.99659900  |
| O | 6.37064300  | -1.20805800 | -3.12440300 |
| O | 5.70304800  | 1.49842500  | -4.09337300 |
| O | 4.32475200  | -2.98697700 | -2.82111200 |
| O | 3.84069300  | -0.67289100 | -3.96784100 |
| H | 3.39572400  | 0.20869000  | 2.66551400  |
| H | -4.86263400 | -4.27725300 | 3.62632800  |
| H | -6.15632600 | -3.05142700 | 3.70541700  |
| H | -6.01656800 | -4.16969700 | 2.30584000  |
| H | -5.63445000 | -4.16131600 | -2.99129500 |
| H | -6.63813800 | -3.81131700 | -1.59347900 |
| H | -6.80860300 | -2.80769800 | -3.06444400 |
| H | -3.48925300 | 6.00188500  | -2.48200500 |
| H | -4.72786200 | 5.01188700  | -3.33876400 |
| H | -4.95712900 | 5.48249400  | -1.64783900 |
| H | -2.73455300 | 5.62234200  | 3.51559800  |
| H | -4.26010700 | 5.44115000  | 2.66262900  |
| H | -4.05770300 | 4.64325600  | 4.24179000  |
| H | 5.65554000  | 2.80233300  | -3.08293800 |
| H | 6.78197800  | -4.31675900 | 2.50054800  |
| H | 3.07978000  | 3.90829600  | 1.73542300  |
| H | 1.97732100  | 4.68182700  | 2.85961100  |
| H | 2.89353700  | 3.23256200  | 3.39452800  |
| H | 2.38849400  | 3.40825000  | -3.80053700 |
| H | 1.10173400  | 4.65125400  | -3.76157900 |
| H | 2.21872100  | 4.54642800  | -2.40932200 |
| H | 1.04568900  | -4.81132100 | -2.87714000 |

|    |              |             |             |
|----|--------------|-------------|-------------|
| H  | -0.57689800  | -5.54805800 | -2.96271400 |
| H  | 0.01880000   | -4.45020200 | -4.25648500 |
| H  | 0.83245200   | -4.84246500 | 3.30458000  |
| H  | 0.06717100   | -5.80736900 | 2.00138300  |
| H  | 1.63698100   | -4.98790100 | 1.75044800  |
| H  | 7.58230500   | 0.62010900  | 3.86706700  |
| H  | 6.32051300   | 1.55594900  | 3.75506900  |
| H  | 2.44108700   | -0.54910800 | -3.15984900 |
| Ir | -6.80839200  | 2.01548200  | 0.74307600  |
| C  | -8.15714700  | 2.13541900  | 2.35019400  |
| H  | -7.30374900  | 3.26017900  | -0.06657200 |
| C  | -8.56000500  | 1.75668900  | -0.36398000 |
| H  | -6.68409000  | 3.33442100  | 1.54235400  |
| C  | -9.44494700  | 1.47044300  | 1.89214800  |
| H  | -7.71066800  | 1.62592800  | 3.22408800  |
| H  | -8.37566800  | 3.16267900  | 2.68445900  |
| C  | -9.77270300  | 1.99070500  | 0.50626000  |
| H  | -8.62545100  | 2.24123500  | -1.35008900 |
| H  | -8.41982000  | 0.66859800  | -0.53864800 |
| H  | -9.31746000  | 0.37400100  | 1.84454100  |
| H  | -10.26487100 | 1.65047200  | 2.60892800  |
| H  | -9.99603500  | 3.07073900  | 0.55451000  |
| H  | -10.66907900 | 1.51115600  | 0.07628800  |

### TS2@Al<sub>8</sub>-NU-1000

Electronic Energy: -7191.7869599

Enthalpy: -7190.666440

Free Energy: -7190.883512

|   |             |             |             |
|---|-------------|-------------|-------------|
| C | 1.68444600  | 3.94340500  | -3.15511700 |
| C | 0.64900300  | -4.90821400 | 2.22466700  |
| C | 2.37165800  | 3.70495200  | 2.55373700  |
| C | 0.00184800  | -4.64437300 | -3.17738100 |
| C | -5.46152000 | -3.56981800 | 3.03746300  |
| C | -4.20580200 | 5.17836900  | -2.39074400 |
| C | -6.09811400 | -3.34297900 | -2.42689700 |
| C | -3.54715000 | 4.91456600  | 3.31257000  |
| C | 1.27404700  | 2.82442600  | 2.03808500  |
| C | 0.75415500  | 3.00363900  | -2.46956500 |
| C | -3.54109900 | 3.93049500  | -1.89882300 |
| C | -5.03720900 | -2.44261100 | -1.88241600 |
| C | -4.54347600 | -2.62148200 | 2.33667600  |
| C | -0.02841200 | -3.67131200 | 1.74597200  |
| C | -3.03325900 | 3.71320700  | 2.58661400  |
| C | -0.52888900 | -3.45025300 | -2.44893800 |
| H | -1.87750500 | -1.87514400 | 2.77931900  |
| H | 1.50459000  | 1.36439500  | -0.23683600 |
| H | -3.67633200 | 1.60773600  | -3.98707400 |
| H | -2.58666200 | 0.45591800  | -3.98018800 |
| H | -2.88773000 | 0.96946800  | 4.59143100  |
| H | -6.33365400 | 0.33588500  | -1.37634500 |

|    |             |             |             |
|----|-------------|-------------|-------------|
| H  | -5.85757400 | 0.14444400  | 2.36901300  |
| H  | -2.57459000 | -1.62226100 | -2.86352300 |
| H  | -4.14834100 | 2.66676300  | 0.40517100  |
| H  | -0.51162900 | 0.66170500  | -4.56471700 |
| H  | -1.06721000 | -0.02983500 | 3.98192500  |
| H  | 0.40784400  | 0.55580000  | 4.02300800  |
| H  | 2.26015800  | -1.61119800 | 1.87448700  |
| O  | -1.75465600 | 1.26351500  | -1.40986200 |
| O  | -2.56122400 | 4.06782200  | -1.11169400 |
| O  | -2.23536900 | 3.92199000  | 1.62264500  |
| O  | 0.11441000  | 3.45801400  | -1.47378500 |
| O  | 0.64719000  | 1.82575200  | -2.90424800 |
| O  | 1.81289100  | -0.50472200 | -2.36787300 |
| O  | -0.05262000 | -2.32865400 | -2.75763000 |
| O  | 0.54511500  | -2.56768800 | 2.00137100  |
| O  | -1.42265000 | -3.63485000 | -1.56557800 |
| O  | -1.11097100 | -3.77617400 | 1.11079300  |
| O  | -4.11628700 | -3.00266700 | -1.22387000 |
| O  | -3.78417900 | -3.12389500 | 1.45630600  |
| O  | -4.55555500 | -1.40916400 | 2.67232500  |
| O  | -5.11076500 | -1.19972100 | -2.10394000 |
| O  | -3.45533200 | -0.57412100 | 0.18129400  |
| O  | -2.38904000 | -1.09959700 | -2.07688100 |
| O  | -1.03838000 | 0.05011400  | -4.03761600 |
| O  | -3.55208400 | 0.67907900  | -3.74782600 |
| O  | -0.09120400 | -0.23296100 | 3.76613600  |
| O  | -0.57997400 | -1.22164700 | -0.24078200 |
| O  | 0.60825800  | 0.99157600  | -0.25054900 |
| O  | 1.23349000  | 1.62067400  | 2.40237600  |
| O  | 2.23518200  | -0.69569000 | 1.55205800  |
| O  | 0.46278900  | 3.35561700  | 1.22235500  |
| O  | -5.80889300 | 1.06920300  | -1.03418700 |
| O  | -5.43081500 | 0.94214600  | 2.03368100  |
| O  | -3.52546100 | 1.94510100  | 0.30080900  |
| O  | -4.02510100 | 2.81819800  | -2.25369700 |
| O  | -3.44298400 | 2.58118700  | 2.94904200  |
| O  | -2.64231800 | 0.23712600  | 4.01585300  |
| O  | -1.85497900 | -1.29452200 | 2.01220400  |
| O  | -1.39715900 | 1.14321200  | 1.45822800  |
| Zr | -2.35669000 | -2.31340900 | -0.04808400 |
| Zr | -0.33766200 | -0.12036500 | -2.08612600 |
| Zr | -3.77322000 | 0.60019100  | -1.46826000 |
| Zr | -3.34427700 | 0.46959000  | 2.05706400  |
| Zr | -1.26898600 | 2.63824200  | 0.05035200  |
| Zr | 0.09709100  | -0.29747200 | 1.48358000  |
| H  | 2.11034500  | -1.26278500 | -1.76403000 |
| Al | 5.65802000  | -2.09418800 | -1.67491200 |
| Al | 5.06992300  | 0.27201600  | -2.90476000 |
| Al | 3.62991500  | -0.73469800 | 0.18429900  |
| Al | 7.05012900  | 0.23330800  | -0.17880600 |
| Al | 4.73418300  | 2.08238400  | -0.99692700 |
| Al | 6.22631500  | -2.55878100 | 0.94919900  |
| Al | 4.85570400  | 1.85311500  | 1.69659700  |



|    |             |             |             |
|----|-------------|-------------|-------------|
| Al | 5.75155300  | -0.49157700 | 2.61200000  |
| H  | 2.88679100  | 1.09953100  | -2.22289800 |
| H  | 4.91160300  | -4.19405200 | -0.46763600 |
| H  | 9.13691800  | 1.27203300  | 0.20180200  |
| H  | 5.57820700  | -2.76970700 | 3.39718600  |
| H  | 1.86596200  | -2.51196100 | -0.10916700 |
| H  | 5.68827200  | 3.89026900  | 0.45381800  |
| H  | 4.66946800  | 3.94001500  | -2.75644600 |
| H  | 8.00776000  | -1.04444600 | 1.78563900  |
| H  | 4.42887800  | -1.96844200 | 4.11980200  |
| H  | 5.06838100  | 3.29461400  | 3.65292700  |
| H  | 7.29804100  | -0.97391700 | -3.01629300 |
| H  | 3.56745400  | -2.92981000 | -2.18348900 |
| H  | 6.60596400  | 1.33954500  | -4.39814600 |
| H  | 4.10776700  | -2.24976400 | -3.47057700 |
| H  | 3.88617100  | -0.42425100 | -4.89511700 |
| O  | 4.48093400  | -0.78503700 | -1.42094400 |
| O  | 3.69545400  | 1.60805700  | -2.39267700 |
| O  | 5.61622700  | -3.54515100 | -0.54619200 |
| O  | 8.77499700  | 0.40610400  | 0.00810100  |
| O  | 6.91248600  | -1.55576600 | -0.44427400 |
| O  | 6.17256300  | 1.12552500  | -1.44338200 |
| O  | 2.63899200  | -2.17695700 | -0.58113200 |
| O  | 6.00570500  | -3.84841500 | 2.18295600  |
| O  | 5.40045800  | 3.46193600  | -2.34519700 |
| O  | 4.81010000  | -1.50168400 | 1.33570600  |
| O  | 3.77653800  | 1.15260500  | 0.31984100  |
| O  | 4.98525500  | 3.23670100  | 0.39177200  |
| O  | 6.27397100  | 0.78669100  | 1.34956100  |
| O  | 7.28399200  | -1.54187400 | 2.20095600  |
| O  | 5.37153800  | -1.92279700 | 3.91916500  |
| O  | 4.23873000  | 0.59391100  | 2.96730200  |
| O  | 5.61909300  | 2.84586000  | 3.00815200  |
| O  | 6.62368600  | 0.60679400  | 3.99960600  |
| O  | 6.37104800  | -1.21526500 | -3.12149500 |
| O  | 5.70890500  | 1.49236200  | -4.09099200 |
| O  | 4.31996600  | -2.99017900 | -2.81796700 |
| O  | 3.84289500  | -0.67597200 | -3.96713300 |
| H  | 3.39327100  | 0.20496700  | 2.66508600  |
| H  | -4.86357600 | -4.27029300 | 3.63552900  |
| H  | -6.16321500 | -3.05263200 | 3.69956300  |
| H  | -6.00751600 | -4.17942800 | 2.30684100  |
| H  | -5.63500200 | -4.13990800 | -3.02178300 |
| H  | -6.61350700 | -3.84225500 | -1.59587800 |
| H  | -6.82767200 | -2.80327700 | -3.03892200 |
| H  | -3.46408100 | 5.94844700  | -2.63246700 |
| H  | -4.85334900 | 4.98448100  | -3.25184000 |
| H  | -4.82632200 | 5.58841600  | -1.58111500 |
| H  | -2.72394600 | 5.59400300  | 3.56516400  |
| H  | -4.21387000 | 5.47834500  | 2.64510400  |
| H  | -4.10252300 | 4.64011600  | 4.21483100  |
| H  | 5.66146900  | 2.79671300  | -3.08033100 |
| H  | 6.77744700  | -4.32078900 | 2.50477800  |

|    |              |             |             |
|----|--------------|-------------|-------------|
| H  | 3.08240000   | 3.90368600  | 1.73649000  |
| H  | 1.97873700   | 4.68380000  | 2.85505100  |
| H  | 2.89100700   | 3.23468100  | 3.39730600  |
| H  | 2.38686100   | 3.40893300  | -3.80296400 |
| H  | 1.10202900   | 4.65363000  | -3.75912200 |
| H  | 2.22113400   | 4.54393800  | -2.40902100 |
| H  | 1.05331200   | -4.79729500 | -2.89744100 |
| H  | -0.56323100  | -5.55268000 | -2.94627100 |
| H  | -0.00475400  | -4.45770600 | -4.25805500 |
| H  | 0.82233300   | -4.84631200 | 3.30652700  |
| H  | 0.07195700   | -5.80840300 | 1.99299800  |
| H  | 1.64151400   | -4.98283500 | 1.75924000  |
| H  | 7.57935600   | 0.61213400  | 3.86727900  |
| H  | 6.31791200   | 1.54808800  | 3.75810200  |
| H  | 2.43989700   | -0.54961100 | -3.15898300 |
| Ir | -6.92357600  | 1.95606500  | 0.67181600  |
| C  | -8.16713500  | 2.48295500  | 2.24022000  |
| C  | -8.53865900  | 2.62470900  | -0.45974000 |
| H  | -7.86140800  | 0.57985000  | 0.94518300  |
| C  | -8.83227300  | 1.40237500  | 1.52199400  |
| H  | -7.77625500  | 2.27272700  | 3.24298100  |
| H  | -8.62959300  | 3.47340500  | 2.15752400  |
| C  | -9.61808700  | 1.84968100  | 0.29970000  |
| H  | -8.68532000  | 3.71498100  | -0.41671900 |
| H  | -8.44685800  | 2.33627000  | -1.51831000 |
| H  | -9.17031300  | 0.50951500  | 2.07440000  |
| H  | -10.51533200 | 2.42396600  | 0.58589000  |
| H  | -9.97240700  | 0.97673200  | -0.26852700 |
| H  | -5.93603200  | 3.35513800  | 0.86930500  |
| H  | -6.13202200  | 3.33774400  | -0.00318800 |

### Ir(butane) H@Al<sub>8</sub>-NU-1000

Electronic Energy: -7191.8182806

Enthalpy: -7190.692855

Free Energy: -7190.912025

|   |             |             |             |
|---|-------------|-------------|-------------|
| C | 1.68444400  | 3.94340200  | -3.15512400 |
| C | 0.64900600  | -4.90821500 | 2.22466000  |
| C | 2.37166400  | 3.70494300  | 2.55373900  |
| C | 0.00185900  | -4.64437600 | -3.17736700 |
| C | -5.46154800 | -3.56981600 | 3.03742900  |
| C | -4.20581200 | 5.17836300  | -2.39074400 |
| C | -6.09809700 | -3.34300200 | -2.42689500 |
| C | -3.54708600 | 4.91457200  | 3.31260500  |
| C | 1.27405300  | 2.82442400  | 2.03808100  |
| C | 0.75415000  | 3.00363900  | -2.46956000 |
| C | -3.54120500 | 3.93043200  | -1.89896900 |
| C | -5.03718800 | -2.44268600 | -1.88246900 |
| C | -4.54354100 | -2.62138500 | 2.33664000  |
| C | -0.02841400 | -3.67126600 | 1.74592500  |
| C | -3.03318400 | 3.71322200  | 2.58683000  |

|    |             |             |             |
|----|-------------|-------------|-------------|
| C  | -0.52887500 | -3.45023500 | -2.44887700 |
| H  | -1.89473200 | -1.87436600 | 2.76788800  |
| H  | 1.50376000  | 1.36142600  | -0.23718900 |
| H  | -3.73923500 | 1.55392700  | -4.09809900 |
| H  | -2.59539600 | 0.45190100  | -4.03581000 |
| H  | -2.86123400 | 0.91442300  | 4.66868300  |
| H  | -6.41024700 | 0.40151900  | -2.00526000 |
| H  | -5.83906400 | 0.15095900  | 2.95418400  |
| H  | -2.60456000 | -1.61382900 | -2.84228600 |
| H  | -4.04266900 | 2.87796500  | 0.38938900  |
| H  | -0.50579000 | 0.65936800  | -4.56852400 |
| H  | -1.02568100 | -0.05309100 | 4.01304500  |
| H  | 0.45055200  | 0.53126800  | 4.02878600  |
| H  | 2.25167300  | -1.60474700 | 1.86854800  |
| O  | -1.76772200 | 1.28111700  | -1.39505900 |
| O  | -2.59696400 | 4.06089800  | -1.06183000 |
| O  | -2.27771900 | 3.91557900  | 1.58594700  |
| O  | 0.11589300  | 3.46183200  | -1.47230900 |
| O  | 0.64095700  | 1.82693400  | -2.90126400 |
| O  | 1.79562500  | -0.50009000 | -2.36265400 |
| O  | -0.05962900 | -2.32529000 | -2.76109200 |
| O  | 0.54698400  | -2.56571600 | 1.99548900  |
| O  | -1.42701600 | -3.62418200 | -1.56440600 |
| O  | -1.11688100 | -3.76584100 | 1.11577200  |
| O  | -4.12578900 | -2.98879500 | -1.19460300 |
| O  | -3.79450900 | -3.10816500 | 1.43685600  |
| O  | -4.51169700 | -1.42723900 | 2.72223200  |
| O  | -5.09012400 | -1.21230300 | -2.14591800 |
| O  | -3.55515000 | -0.52244200 | 0.20396200  |
| O  | -2.40746600 | -1.07753700 | -2.06700200 |
| O  | -1.04111300 | 0.05965900  | -4.03641700 |
| O  | -3.56896300 | 0.64430900  | -3.81837800 |
| O  | -0.05744900 | -0.24897300 | 3.76346500  |
| O  | -0.61229500 | -1.20017100 | -0.23711900 |
| O  | 0.60280300  | 0.99802500  | -0.24908000 |
| O  | 1.22706300  | 1.62156100  | 2.40092200  |
| O  | 2.22474600  | -0.68985100 | 1.54355700  |
| O  | 0.46393100  | 3.35851900  | 1.22082600  |
| O  | -5.92051100 | 1.13092600  | -1.60309800 |
| O  | -5.44767600 | 0.92043400  | 2.52043900  |
| O  | -3.73001900 | 1.96716400  | 0.32736500  |
| O  | -3.95890600 | 2.81803600  | -2.31962200 |
| O  | -3.38170800 | 2.57614300  | 2.99331500  |
| O  | -2.59451100 | 0.21079800  | 4.06656500  |
| O  | -1.86278200 | -1.27780800 | 2.01274700  |
| O  | -1.41432100 | 1.15997800  | 1.45386400  |
| Zr | -2.38402100 | -2.29398400 | -0.04486300 |
| Zr | -0.34934100 | -0.11111300 | -2.08738400 |
| Zr | -3.79893900 | 0.62209500  | -1.54380200 |
| Zr | -3.32660100 | 0.47075800  | 2.13260400  |
| Zr | -1.25397800 | 2.64538500  | 0.04458500  |
| Zr | 0.09396600  | -0.28977700 | 1.48268800  |
| H  | 2.09212400  | -1.26153500 | -1.76105600 |

|    |             |             |             |
|----|-------------|-------------|-------------|
| Al | 5.63961600  | -2.09510100 | -1.69101100 |
| Al | 5.05120700  | 0.27322200  | -2.91789300 |
| Al | 3.62279300  | -0.73186700 | 0.17450500  |
| Al | 7.04034700  | 0.23091800  | -0.19752800 |
| Al | 4.72552000  | 2.08527500  | -1.00880100 |
| Al | 6.21447400  | -2.55985000 | 0.93267200  |
| Al | 4.85269300  | 1.85469900  | 1.68445800  |
| Al | 5.74958700  | -0.49152700 | 2.59788200  |
| H  | 2.87499800  | 1.10071500  | -2.22334200 |
| H  | 4.89861100  | -4.19859400 | -0.48220700 |
| H  | 9.13355400  | 1.26241000  | 0.17907900  |
| H  | 5.57686600  | -2.76993600 | 3.38410800  |
| H  | 1.86203500  | -2.51781300 | -0.10429400 |
| H  | 5.68079500  | 3.89169700  | 0.44183300  |
| H  | 4.66932600  | 3.95111100  | -2.76591500 |
| H  | 8.00256600  | -1.04855500 | 1.76304100  |
| H  | 4.43559700  | -1.96772500 | 4.12046500  |
| H  | 5.08082000  | 3.30497700  | 3.63711400  |
| H  | 7.27485000  | -0.97825900 | -3.04584800 |
| H  | 3.54635600  | -2.93170300 | -2.19224900 |
| H  | 6.57625500  | 1.33817400  | -4.42747600 |
| H  | 4.08084600  | -2.24859300 | -3.48014400 |
| H  | 3.84743500  | -0.41922800 | -4.90037400 |
| O  | 4.46417500  | -0.78400000 | -1.43358800 |
| O  | 3.67996500  | 1.61228500  | -2.39974000 |
| O  | 5.59867400  | -3.54491900 | -0.56141100 |
| O  | 8.76499400  | 0.39888600  | -0.01261300 |
| O  | 6.89606200  | -1.55724300 | -0.46340400 |
| O  | 6.15872300  | 1.12373500  | -1.45906900 |
| O  | 2.62544400  | -2.17395000 | -0.58522300 |
| O  | 5.99258500  | -3.84768700 | 2.16726700  |
| O  | 5.39345400  | 3.46088900  | -2.35708800 |
| O  | 4.80019100  | -1.50017400 | 1.32502300  |
| O  | 3.76569200  | 1.15582400  | 0.31015400  |
| O  | 4.97675500  | 3.23899900  | 0.37994400  |
| O  | 6.26590100  | 0.78559900  | 1.33155200  |
| O  | 7.27746800  | -1.54336000 | 2.17931600  |
| O  | 5.37513800  | -1.92168900 | 3.90626500  |
| O  | 4.23706200  | 0.59636900  | 2.95699300  |
| O  | 5.62238700  | 2.84602500  | 2.99193900  |
| O  | 6.62487100  | 0.60601300  | 3.98216500  |
| O  | 6.34580000  | -1.21588700 | -3.14051100 |
| O  | 5.68462400  | 1.49320700  | -4.10604200 |
| O  | 4.29624700  | -2.98959800 | -2.82970100 |
| O  | 3.81239100  | -0.67125700 | -3.97203900 |
| H  | 3.39221400  | 0.20617700  | 2.65649400  |
| H  | -4.91544100 | -4.02423900 | 3.87585400  |
| H  | -6.33308400 | -3.05321600 | 3.45337500  |
| H  | -5.77592400 | -4.38230800 | 2.37389800  |
| H  | -5.67415400 | -4.31337700 | -2.70681100 |
| H  | -6.83881500 | -3.53363800 | -1.63726200 |
| H  | -6.61752000 | -2.88881900 | -3.27678200 |
| H  | -3.48681900 | 5.78652800  | -2.95594900 |

|    |             |             |             |
|----|-------------|-------------|-------------|
| H  | -5.07190200 | 4.95359700  | -3.02054900 |
| H  | -4.51637800 | 5.79041300  | -1.53412500 |
| H  | -2.70879700 | 5.52664700  | 3.67004400  |
| H  | -4.11124700 | 5.54819800  | 2.61437800  |
| H  | -4.18995200 | 4.63531600  | 4.15286600  |
| H  | 5.64827800  | 2.79640100  | -3.09526100 |
| H  | 6.76002100  | -4.33178600 | 2.48186500  |
| H  | 3.07686100  | 3.91092000  | 1.73353700  |
| H  | 1.97624300  | 4.68033100  | 2.86270400  |
| H  | 2.89672000  | 3.23150900  | 3.39191500  |
| H  | 2.37926600  | 3.41047500  | -3.81209500 |
| H  | 1.10065100  | 4.66200300  | -3.74767500 |
| H  | 2.22943000  | 4.53438300  | -2.40758000 |
| H  | 1.08481500  | -4.72076000 | -3.01234000 |
| H  | -0.48323500 | -5.57164700 | -2.85770600 |
| H  | -0.13449400 | -4.50577200 | -4.25722700 |
| H  | 0.80857600  | -4.85032700 | 3.30885300  |
| H  | 0.07716800  | -5.80899400 | 1.98294200  |
| H  | 1.64706300  | -4.97614900 | 1.77063400  |
| H  | 7.58141200  | 0.60776300  | 3.85619000  |
| H  | 6.32271400  | 1.54842800  | 3.74173300  |
| H  | 2.42229800  | -0.54532900 | -3.15646100 |
| Ir | -5.78060900 | 0.81884700  | 0.46840600  |
| C  | -7.05420600 | 2.40233800  | 0.66403100  |
| C  | -6.30112000 | 3.71748200  | 0.65472400  |
| H  | -7.58820000 | 2.25267800  | 1.61600800  |
| H  | -7.78538300 | 2.36426600  | -0.16021200 |
| H  | -7.02794800 | -0.13811600 | 0.53045800  |
| H  | -5.73717900 | 3.79740800  | -0.29310700 |
| C  | -7.17449300 | 4.96332600  | 0.79640600  |
| H  | -6.53708700 | 5.85750200  | 0.68127500  |
| H  | -7.88546900 | 5.00246800  | -0.04719100 |
| C  | -7.92755800 | 5.04576200  | 2.10917600  |
| H  | -8.48280600 | 5.98934900  | 2.20195700  |
| H  | -8.65646400 | 4.23023600  | 2.21804300  |
| H  | -7.24413900 | 4.98044300  | 2.97020900  |
| H  | -5.56257600 | 3.71549000  | 1.48029100  |

### TS3@Al<sub>8</sub>-NU-1000

Electronic Energy: -7191.8132798

Enthalpy: -7190.691359

Free Energy: -7190.909096

|   |             |             |             |
|---|-------------|-------------|-------------|
| C | 1.68444800  | 3.94340000  | -3.15512100 |
| C | 0.64900500  | -4.90821400 | 2.22466400  |
| C | 2.37166400  | 3.70494700  | 2.55373300  |
| C | 0.00185700  | -4.64437500 | -3.17737100 |
| C | -5.46152300 | -3.56982200 | 3.03745400  |
| C | -4.20580500 | 5.17837200  | -2.39073100 |
| C | -6.09808300 | -3.34300800 | -2.42691100 |
| C | -3.54710600 | 4.91457500  | 3.31258600  |

|   |             |             |             |
|---|-------------|-------------|-------------|
| C | 1.27405600  | 2.82442600  | 2.03808400  |
| C | 0.75414900  | 3.00362100  | -2.46954200 |
| C | -3.54119800 | 3.93046700  | -1.89895400 |
| C | -5.03723600 | -2.44266000 | -1.88258800 |
| C | -4.54349000 | -2.62143200 | 2.33674400  |
| C | -0.02842600 | -3.67127100 | 1.74594700  |
| C | -3.03319100 | 3.71324400  | 2.58679900  |
| C | -0.52889300 | -3.45025300 | -2.44888900 |
| H | -1.89084700 | -1.87497700 | 2.77593500  |
| H | 1.49708900  | 1.36588000  | -0.23400600 |
| H | -3.61524700 | 1.63548600  | -3.94211700 |
| H | -2.57931100 | 0.44269800  | -3.97767400 |
| H | -2.89292300 | 0.98146000  | 4.58974300  |
| H | -6.30517500 | 1.45374600  | -1.86430100 |
| H | -5.89874200 | 0.12999500  | 2.27931200  |
| H | -2.58278000 | -1.62734100 | -2.86083400 |
| H | -4.23242600 | 2.62101000  | 0.38519700  |
| H | -0.50823600 | 0.65400000  | -4.56252800 |
| H | -1.08261100 | -0.02673200 | 3.98134700  |
| H | 0.39416500  | 0.55612300  | 4.02729000  |
| H | 2.25186400  | -1.60857500 | 1.87869000  |
| O | -1.76207000 | 1.25269000  | -1.41031500 |
| O | -2.56397200 | 4.05775000  | -1.10922300 |
| O | -2.22195000 | 3.91764400  | 1.63478600  |
| O | 0.10839500  | 3.45610600  | -1.47647200 |
| O | 0.65001800  | 1.82402000  | -2.90208900 |
| O | 1.82036900  | -0.50606500 | -2.36529600 |
| O | -0.04412100 | -2.32981200 | -2.74842000 |
| O | 0.53943300  | -2.56613400 | 2.00549600  |
| O | -1.42376400 | -3.63769100 | -1.56762900 |
| O | -1.10948900 | -3.77779700 | 1.10734700  |
| O | -4.12294900 | -3.00644900 | -1.20929200 |
| O | -3.78049000 | -3.11456100 | 1.45424500  |
| O | -4.56473000 | -1.40998200 | 2.67497600  |
| O | -5.08356100 | -1.20183300 | -2.11796200 |
| O | -3.47143800 | -0.57866100 | 0.17490200  |
| O | -2.37740200 | -1.10923700 | -2.07610400 |
| O | -1.03176900 | 0.04138000  | -4.03325700 |
| O | -3.53813800 | 0.69166500  | -3.74180600 |
| O | -0.10653200 | -0.23006200 | 3.76584200  |
| O | -0.58764200 | -1.22126600 | -0.23870100 |
| O | 0.60191700  | 0.99034700  | -0.24961600 |
| O | 1.22566100  | 1.62247400  | 2.40699500  |
| O | 2.22526600  | -0.69336700 | 1.55545600  |
| O | 0.46485200  | 3.35418200  | 1.21809700  |
| O | -5.85893200 | 1.18746100  | -1.05066100 |
| O | -5.44287200 | 0.91296400  | 1.94668100  |
| O | -3.54645900 | 1.94731400  | 0.29802800  |
| O | -4.02079500 | 2.81743900  | -2.27080500 |
| O | -3.45191100 | 2.58128000  | 2.94588800  |
| O | -2.65679300 | 0.24444700  | 4.01637200  |
| O | -1.86524300 | -1.29289200 | 2.00985300  |
| O | -1.41321800 | 1.14063500  | 1.44803000  |

|    |             |             |             |
|----|-------------|-------------|-------------|
| Zr | -2.36171600 | -2.32683200 | -0.05044800 |
| Zr | -0.32609500 | -0.12913500 | -2.08437700 |
| Zr | -3.74679900 | 0.58128600  | -1.45844800 |
| Zr | -3.36183800 | 0.46771900  | 2.05835900  |
| Zr | -1.27565200 | 2.64152100  | 0.05459500  |
| Zr | 0.08743900  | -0.29742200 | 1.48558500  |
| H  | 2.11851500  | -1.26386500 | -1.75984100 |
| Al | 5.65953100  | -2.09182300 | -1.66124100 |
| Al | 5.07835300  | 0.27729800  | -2.88836900 |
| Al | 3.62700600  | -0.73248200 | 0.19361000  |
| Al | 7.04932900  | 0.23115600  | -0.15696100 |
| Al | 4.73767700  | 2.08549600  | -0.97958100 |
| Al | 6.21592000  | -2.56206300 | 0.96472900  |
| Al | 4.85232500  | 1.85110600  | 1.71398100  |
| Al | 5.74019300  | -0.49664300 | 2.62955100  |
| H  | 2.89292900  | 1.10501700  | -2.21145700 |
| H  | 4.90434300  | -4.19271600 | -0.45934900 |
| H  | 9.13808000  | 1.26659200  | 0.22614300  |
| H  | 5.55977200  | -2.77594500 | 3.41063400  |
| H  | 1.86297200  | -2.50952200 | -0.10539300 |
| H  | 5.69298700  | 3.88788800  | 0.47673500  |
| H  | 4.68417700  | 3.94976300  | -2.73474000 |
| H  | 7.99810700  | -1.05375500 | 1.81004500  |
| H  | 4.41156600  | -1.97366500 | 4.13467900  |
| H  | 5.06539300  | 3.29351000  | 3.67165500  |
| H  | 7.30517900  | -0.96948500 | -2.99650600 |
| H  | 3.57255400  | -2.93209200 | -2.18794600 |
| H  | 6.61701400  | 1.34718600  | -4.37838500 |
| H  | 4.12014600  | -2.24277800 | -3.46679200 |
| H  | 3.89691000  | -0.41075400 | -4.88374200 |
| O  | 4.48109900  | -0.78305600 | -1.40990300 |
| O  | 3.70185200  | 1.61351800  | -2.37877700 |
| O  | 5.60967800  | -3.54425400 | -0.53482000 |
| O  | 8.77365200  | 0.40177700  | 0.03230800  |
| O  | 6.90876000  | -1.55730500 | -0.42470000 |
| O  | 6.17515800  | 1.12590700  | -1.42256700 |
| O  | 2.63701800  | -2.17461900 | -0.57569100 |
| O  | 5.98645600  | -3.85305100 | 2.19525300  |
| O  | 5.41026200  | 3.46496100  | -2.32278800 |
| O  | 4.80055400  | -1.50265000 | 1.34853700  |
| O  | 3.77513600  | 1.15459400  | 0.33269900  |
| O  | 4.98822900  | 3.23643900  | 0.41178400  |
| O  | 6.26902200  | 0.78218900  | 1.36999700  |
| O  | 7.27132700  | -1.54981100 | 2.22151000  |
| O  | 5.35404600  | -1.92907400 | 3.93313700  |
| O  | 4.22789200  | 0.59164600  | 2.98059400  |
| O  | 5.61455300  | 2.83996100  | 3.02897800  |
| O  | 6.60892300  | 0.59759700  | 4.02165600  |
| O  | 6.37807800  | -1.20965700 | -3.10338300 |
| O  | 5.72002600  | 1.49971500  | -4.07086700 |
| O  | 4.33031600  | -2.98516400 | -2.81585600 |
| O  | 3.85281100  | -0.66705900 | -3.95700100 |
| H  | 3.38290400  | 0.20489800  | 2.67474600  |

|    |              |             |             |
|----|--------------|-------------|-------------|
| H  | -5.33056900  | -3.48290200 | 4.12360800  |
| H  | -6.50533400  | -3.29747600 | 2.83049500  |
| H  | -5.29214200  | -4.60330100 | 2.72220800  |
| H  | -6.81046500  | -2.80565000 | -3.06046000 |
| H  | -5.63371100  | -4.15866100 | -2.99450500 |
| H  | -6.63552300  | -3.81366600 | -1.59342300 |
| H  | -3.52076200  | 6.03221700  | -2.37286900 |
| H  | -4.62622100  | 5.04053700  | -3.39294400 |
| H  | -5.04550300  | 5.40880500  | -1.71895200 |
| H  | -4.07912500  | 5.56702900  | 2.60700500  |
| H  | -4.21740000  | 4.64133800  | 4.13378000  |
| H  | -2.70960900  | 5.50894000  | 3.70084800  |
| H  | 5.67127600   | 2.80130200  | -3.05969900 |
| H  | 6.75392100   | -4.33247800 | 2.51684400  |
| H  | 3.08116800   | 3.90705300  | 1.73643800  |
| H  | 1.97702600   | 4.68214100  | 2.85818200  |
| H  | 2.89202800   | 3.23348800  | 3.39600500  |
| H  | 2.39739200   | 3.40670000  | -3.78941800 |
| H  | 1.10265700   | 4.64098500  | -3.77429800 |
| H  | 2.20818400   | 4.55728100  | -2.41081600 |
| H  | 1.00733200   | -4.87248400 | -2.79599800 |
| H  | -0.63063900  | -5.52622200 | -3.03473600 |
| H  | 0.11584900   | -4.42075700 | -4.24433600 |
| H  | 0.80541900   | -4.85311600 | 3.30950800  |
| H  | 0.07929300   | -5.80924400 | 1.97890400  |
| H  | 1.64887000   | -4.97446100 | 1.77403700  |
| H  | 7.56552100   | 0.60001600  | 3.89618400  |
| H  | 6.30739300   | 1.54029200  | 3.78032900  |
| H  | 2.45368100   | -0.54489600 | -3.15313900 |
| Ir | -6.83474300  | 1.96089400  | 0.51625500  |
| C  | -6.60705400  | 3.63475800  | 1.64127100  |
| H  | -8.01912500  | 1.87987000  | 1.71637400  |
| H  | -7.82491300  | 2.69924600  | -0.48164200 |
| H  | -5.67700100  | 3.59577300  | 2.22185600  |
| H  | -6.76911500  | 4.59466400  | 1.13212100  |
| C  | -7.77387200  | 3.00125200  | 2.25386700  |
| H  | -7.57201000  | 2.58011800  | 3.25352000  |
| C  | -9.11981500  | 3.69735700  | 2.16221800  |
| H  | -9.11131100  | 4.52710100  | 2.88901400  |
| H  | -9.20365200  | 4.16707200  | 1.16953400  |
| C  | -10.30439800 | 2.78965000  | 2.41541400  |
| H  | -10.24548900 | 2.30846600  | 3.40324400  |
| H  | -11.25466500 | 3.33773100  | 2.37647300  |
| H  | -10.35986800 | 1.98853700  | 1.66250700  |

**Ir(1-butene) H<sub>2</sub>@Al<sub>8</sub>-NU-1000**

Electronic Energy: -7191.8348741

Enthalpy: -7190.713697

Free Energy: -7190.933624

|   |            |             |             |
|---|------------|-------------|-------------|
| C | 1.68444800 | 3.94339900  | -3.15512300 |
| C | 0.64900600 | -4.90821400 | 2.22466300  |



|   |             |             |             |
|---|-------------|-------------|-------------|
| C | 2.37166500  | 3.70494700  | 2.55373000  |
| C | 0.00186000  | -4.64437500 | -3.17736900 |
| C | -5.46153100 | -3.56981600 | 3.03745200  |
| C | -4.20580800 | 5.17837300  | -2.39072600 |
| C | -6.09807600 | -3.34301500 | -2.42691400 |
| C | -3.54710000 | 4.91457400  | 3.31259200  |
| C | 1.27406200  | 2.82442600  | 2.03808800  |
| C | 0.75414400  | 3.00361200  | -2.46952700 |
| C | -3.54123100 | 3.93045700  | -1.89896300 |
| C | -5.03725200 | -2.44266700 | -1.88262400 |
| C | -4.54347700 | -2.62141800 | 2.33672800  |
| C | -0.02842200 | -3.67126000 | 1.74594600  |
| C | -3.03316500 | 3.71325500  | 2.58681700  |
| C | -0.52889600 | -3.45026100 | -2.44886700 |
| H | -1.88309700 | -1.87720800 | 2.77945200  |
| H | 1.50561600  | 1.36230100  | -0.23648600 |
| H | -3.66962200 | 1.60522600  | -3.99444900 |
| H | -2.58039000 | 0.45224300  | -3.98428600 |
| H | -2.86353700 | 1.01671300  | 4.54987000  |
| H | -6.37847900 | 0.37342200  | -1.31121600 |
| H | -5.94671200 | 0.55882700  | 2.67667200  |
| H | -2.57248000 | -1.62244800 | -2.86896100 |
| H | -4.15282200 | 2.69277900  | 0.41350600  |
| H | -0.50879700 | 0.66175500  | -4.56380700 |
| H | -1.06958300 | -0.03333900 | 3.97656300  |
| H | 0.40253900  | 0.55567600  | 4.02150500  |
| H | 2.26746800  | -1.61065700 | 1.87578400  |
| O | -1.75587500 | 1.26063500  | -1.40594500 |
| O | -2.55837500 | 4.06504300  | -1.11612500 |
| O | -2.23668300 | 3.91610200  | 1.62074700  |
| O | 0.11395000  | 3.45731100  | -1.47329500 |
| O | 0.64683100  | 1.82543900  | -2.90334400 |
| O | 1.81366300  | -0.50636400 | -2.37117400 |
| O | -0.05310000 | -2.32853500 | -2.75744700 |
| O | 0.54665000  | -2.56761900 | 1.99810000  |
| O | -1.42104800 | -3.63642800 | -1.56435400 |
| O | -1.11161500 | -3.77699500 | 1.11203500  |
| O | -4.11073100 | -3.00344200 | -1.23271600 |
| O | -3.79610200 | -3.12220300 | 1.44082400  |
| O | -4.53209600 | -1.41291000 | 2.68463400  |
| O | -5.11330400 | -1.19685100 | -2.09489800 |
| O | -3.44233300 | -0.57239000 | 0.17583700  |
| O | -2.38639000 | -1.10115500 | -2.08147000 |
| O | -1.03626700 | 0.05076700  | -4.03662900 |
| O | -3.54634500 | 0.67739300  | -3.75122400 |
| O | -0.09492300 | -0.23382300 | 3.76330000  |
| O | -0.58066300 | -1.22408000 | -0.24183500 |
| O | 0.60921800  | 0.98908300  | -0.25044600 |
| O | 1.23142100  | 1.62068100  | 2.40271500  |
| O | 2.23699700  | -0.69551900 | 1.55289000  |
| O | 0.46163100  | 3.35466200  | 1.22231100  |
| O | -5.79486300 | 1.06045300  | -0.96475000 |
| O | -5.46022600 | 0.92839500  | 1.93142200  |

|    |             |             |             |
|----|-------------|-------------|-------------|
| O  | -3.54385500 | 1.95077900  | 0.30114100  |
| O  | -4.02372500 | 2.81600600  | -2.25694300 |
| O  | -3.44483300 | 2.57913400  | 2.94995400  |
| O  | -2.65676300 | 0.24734100  | 4.00766500  |
| O  | -1.85109800 | -1.29880700 | 2.01091900  |
| O  | -1.40255300 | 1.13714400  | 1.45400000  |
| Zr | -2.35916600 | -2.32409400 | -0.04910000 |
| Zr | -0.33380200 | -0.12387100 | -2.08582700 |
| Zr | -3.76341200 | 0.59609300  | -1.47443800 |
| Zr | -3.33513600 | 0.45789500  | 2.04185100  |
| Zr | -1.27050800 | 2.64119000  | 0.04989200  |
| Zr | 0.10100300  | -0.30327700 | 1.47965900  |
| H  | 2.11332200  | -1.26271600 | -1.76557600 |
| Al | 5.66133800  | -2.08909700 | -1.67811600 |
| Al | 5.06992400  | 0.27692600  | -2.90677900 |
| Al | 3.63310700  | -0.73155200 | 0.18236600  |
| Al | 7.05106700  | 0.24015400  | -0.18200200 |
| Al | 4.73204000  | 2.08704500  | -0.99893700 |
| Al | 6.23031600  | -2.55308800 | 0.94627900  |
| Al | 4.85564600  | 1.85760100  | 1.69471100  |
| Al | 5.75485300  | -0.48635300 | 2.60984900  |
| H  | 2.88564700  | 1.10105600  | -2.22379600 |
| H  | 4.91935000  | -4.19201100 | -0.47115800 |
| H  | 9.13853300  | 1.28017500  | 0.19634000  |
| H  | 5.58492400  | -2.76503800 | 3.39510800  |
| H  | 1.86866700  | -2.50962800 | -0.10873500 |
| H  | 5.68354000  | 3.89573900  | 0.45191100  |
| H  | 4.66852900  | 3.94780800  | -2.75727100 |
| H  | 8.01123000  | -1.03740100 | 1.78181000  |
| H  | 4.43781100  | -1.96524000 | 4.12400000  |
| H  | 5.07229900  | 3.30410900  | 3.64877000  |
| H  | 7.29898600  | -0.96656900 | -3.02229700 |
| H  | 3.57223100  | -2.92889900 | -2.18894000 |
| H  | 6.60139300  | 1.34705700  | -4.40424200 |
| H  | 4.11192300  | -2.24624800 | -3.47459400 |
| H  | 3.88383200  | -0.41954200 | -4.89648500 |
| O  | 4.48153000  | -0.78215400 | -1.42380100 |
| O  | 3.69324300  | 1.61088300  | -2.39398800 |
| O  | 5.62088800  | -3.53977800 | -0.54932600 |
| O  | 8.77546200  | 0.41448100  | 0.00385700  |
| O  | 6.91425200  | -1.54888500 | -0.44741800 |
| O  | 6.17058100  | 1.13086000  | -1.44575100 |
| O  | 2.64015400  | -2.17290700 | -0.58193600 |
| O  | 6.01030800  | -3.84261400 | 2.17993800  |
| O  | 5.39756400  | 3.46649700  | -2.34640000 |
| O  | 4.81269800  | -1.49756200 | 1.33403400  |
| O  | 3.77519800  | 1.15547800  | 0.31822400  |
| O  | 4.98126800  | 3.24129500  | 0.38988300  |
| O  | 6.27376600  | 0.79215500  | 1.34619800  |
| O  | 7.28745500  | -1.53495800 | 2.19693900  |
| O  | 5.37898200  | -1.91791200 | 3.91718000  |
| O  | 4.24068800  | 0.59795300  | 2.96581600  |
| O  | 5.62011700  | 2.85088600  | 3.00471800  |

|    |             |             |             |
|----|-------------|-------------|-------------|
| O  | 6.62582400  | 0.61287400  | 3.99672600  |
| O  | 6.37180000  | -1.20834200 | -3.12470700 |
| O  | 5.70543800  | 1.49852300  | -4.09324100 |
| O  | 4.32527600  | -2.98675000 | -2.82250100 |
| O  | 3.84232100  | -0.67216400 | -3.96862500 |
| H  | 3.39556500  | 0.20787900  | 2.66482500  |
| H  | -4.86459000 | -4.31940500 | 3.57323500  |
| H  | -6.11724200 | -3.05827500 | 3.74873300  |
| H  | -6.06192300 | -4.12262000 | 2.30409700  |
| H  | -5.63497700 | -4.16434100 | -2.98700800 |
| H  | -6.64023700 | -3.80721000 | -1.59242500 |
| H  | -6.80739000 | -2.80933500 | -3.06725700 |
| H  | -3.45973500 | 5.91698900  | -2.70799900 |
| H  | -4.91111600 | 4.97522700  | -3.20341400 |
| H  | -4.75459800 | 5.63431200  | -1.55431100 |
| H  | -2.78982100 | 5.70496200  | 3.35829100  |
| H  | -4.40045700 | 5.31890600  | 2.74889600  |
| H  | -3.90215400 | 4.65992700  | 4.31654900  |
| H  | 5.65816900  | 2.80217100  | -3.08262900 |
| H  | 6.78095000  | -4.31831000 | 2.49949600  |
| H  | 3.07978100  | 3.90795100  | 1.73532300  |
| H  | 1.97748000  | 4.68190700  | 2.85948800  |
| H  | 2.89361800  | 3.23258300  | 3.39448900  |
| H  | 2.38725500  | 3.40863900  | -3.80222100 |
| H  | 1.10199500  | 4.65306000  | -3.75975200 |
| H  | 2.22034800  | 4.54459000  | -2.40902700 |
| H  | 1.05041600  | -4.80266900 | -2.88941900 |
| H  | -0.56851000 | -5.55091700 | -2.95260200 |
| H  | 0.00448700  | -4.45474700 | -4.25747800 |
| H  | 0.83231700  | -4.84235000 | 3.30458900  |
| H  | 0.06718800  | -5.80740100 | 2.00143700  |
| H  | 1.63698500  | -4.98789000 | 1.75048900  |
| H  | 7.58192900  | 0.61813600  | 3.86762700  |
| H  | 6.32036400  | 1.55423900  | 3.75543100  |
| H  | 2.44319500  | -0.54859400 | -3.16144800 |
| Ir | -6.66001400 | 2.11555400  | 0.68914500  |
| C  | -8.21658800 | 2.66032800  | -0.60052500 |
| C  | -7.21992800 | 3.66712300  | -0.63081100 |
| H  | -9.17478600 | 2.86021300  | -0.10710500 |
| H  | -8.27965200 | 1.93134600  | -1.41745900 |
| H  | -6.49223600 | 3.60832700  | -1.45598700 |
| H  | -6.72409200 | 3.28264300  | 1.73791300  |
| C  | -7.44176800 | 5.05399800  | -0.09360500 |
| H  | -8.13326500 | 5.00820600  | 0.76447600  |
| H  | -7.69097600 | 2.30702700  | 1.85537400  |
| C  | -7.99154500 | 5.99964300  | -1.14943000 |
| H  | -8.13530500 | 7.01422600  | -0.75308700 |
| H  | -7.31841100 | 6.07773500  | -2.01616300 |
| H  | -8.96300500 | 5.65069800  | -1.52879100 |
| H  | -6.49479000 | 5.45436900  | 0.31135200  |

**Table S4.** XYZ Cartesian Coordinates of All Optimized Structures on the NU-1000 Support (All Energies Are in Hartree).

**NU-1000**

Electronic Energy: -3323.3052019

Enthalpy: -3322.672584

Free Energy: -3322.807208

|    |             |             |             |
|----|-------------|-------------|-------------|
| C  | 4.31818800  | 2.42872700  | 3.42363400  |
| C  | -4.37565600 | 3.54230300  | -2.15131200 |
| C  | 4.30989200  | 3.54630100  | -2.26423800 |
| C  | -4.34411200 | 2.52671000  | 3.32396300  |
| C  | -4.31378500 | -2.56037200 | -3.32528100 |
| C  | 4.34707500  | -3.50753900 | 2.28940900  |
| C  | -4.34435700 | -3.58264100 | 2.15493800  |
| C  | 4.35596000  | -2.38179500 | -3.42138300 |
| Zr | -2.51866300 | 0.01125000  | 0.00601300  |
| Zr | 0.01514500  | 1.32927200  | 2.11852800  |
| Zr | -0.01421000 | -2.15596300 | 1.35369300  |
| Zr | 0.01878100  | -1.33477500 | -2.06591400 |
| Zr | 2.52488200  | 0.01423900  | 0.00796000  |
| Zr | -0.01878500 | 2.16588200  | -1.40333300 |
| O  | 1.06001000  | -0.32626600 | 1.42033500  |
| O  | 3.59813600  | -1.64141300 | 1.06465100  |
| O  | 3.59902400  | -1.04417100 | -1.64445000 |
| O  | 3.59010300  | 1.04313500  | 1.66745300  |
| O  | 2.03901200  | 1.89690300  | 3.04070300  |
| O  | -0.04845000 | 3.62751300  | 2.02688000  |
| O  | -2.05044600 | 2.13667400  | 2.84219500  |
| O  | -2.09460200 | 3.04428100  | -1.80966400 |
| O  | -3.60504500 | 1.06628800  | 1.63611800  |
| O  | -3.62924200 | 1.59498800  | -1.05723400 |
| O  | -3.59580300 | -1.65713600 | 1.03450000  |
| O  | -3.57929300 | -1.12399500 | -1.61999300 |
| O  | -2.01506500 | -2.10540600 | -2.89380300 |
| O  | -2.05192400 | -3.05416500 | 1.86884800  |
| O  | -1.05789600 | -1.46192300 | -0.30873200 |
| O  | -1.38939300 | -0.44822200 | 2.02631800  |
| O  | -0.03572400 | 0.52547600  | 4.05637000  |
| O  | 0.05859400  | -2.04865600 | 3.64303100  |
| O  | -0.05693400 | 2.10641000  | -3.51760200 |
| O  | -1.06691600 | 1.40248400  | 0.29767300  |
| O  | 1.38814300  | 2.01447300  | 0.42426300  |
| O  | 2.04554000  | 2.89601400  | -2.09251500 |
| O  | 0.01991300  | 4.07540800  | -0.53519200 |
| O  | 3.59455100  | 1.63673600  | -1.07507800 |
| O  | 0.03893000  | -4.08522400 | 0.53640000  |
| O  | -0.03583100 | -3.64064600 | -2.03712800 |
| O  | 1.39441500  | -2.04584300 | -0.42886500 |
| O  | 2.06104400  | -2.87497900 | 2.13191600  |

|   |             |             |             |
|---|-------------|-------------|-------------|
| O | 2.05880400  | -1.84570800 | -3.06232000 |
| O | 0.07443900  | -0.38287900 | -4.13330900 |
| O | -1.39177900 | 0.40580600  | -2.02918800 |
| O | 1.05913700  | 0.28908100  | -1.42631600 |
| C | 3.23220500  | 2.62024900  | -1.79129200 |
| C | 3.23283600  | 1.72911200  | 2.66888900  |
| C | 3.25156500  | -2.60448800 | 1.80674200  |
| C | -3.24717500 | -2.70013000 | 1.65262600  |
| C | -3.22080000 | -1.87957600 | -2.55935500 |
| C | -3.27905000 | 2.66315100  | -1.64653900 |
| C | 3.25702800  | -1.69512500 | -2.66749900 |
| C | -3.24639400 | 1.86377300  | 2.55112300  |
| H | -1.94294700 | 0.57446400  | -2.79961200 |
| H | 1.93208400  | 2.79567400  | 0.56297300  |
| H | 0.93813200  | -2.36681100 | 3.88804400  |
| H | 0.03488900  | -1.06464100 | 3.91231000  |
| H | 0.93819500  | -0.57406800 | -4.52092500 |
| H | -0.03019500 | -3.92940500 | -1.06031100 |
| H | -0.65973300 | -4.65438200 | 0.87738500  |
| H | -0.90672100 | -3.88158600 | -2.38089700 |
| H | -1.94705400 | -0.56990300 | 2.80092000  |
| H | 1.93339100  | -2.83012400 | -0.57033200 |
| H | 0.65663700  | 0.87466200  | 4.62795600  |
| H | 0.63304600  | 2.65725600  | -3.90332900 |
| H | -0.92000400 | 3.87351800  | 2.36453400  |
| H | -0.66941600 | 4.65637500  | -0.87405200 |
| H | -0.04253900 | 3.90416400  | 1.04407000  |
| H | 0.04284800  | 0.64160700  | -3.99104200 |
| H | -3.95765200 | 3.16014200  | 4.12841600  |
| H | -4.95849200 | 3.12928400  | 2.64201100  |
| H | -5.01259200 | 1.76503800  | 3.74458300  |
| H | -4.00240300 | 4.28790600  | -2.86026500 |
| H | -5.17230500 | 2.94505400  | -2.61015300 |
| H | -4.83193500 | 4.06678400  | -1.30005700 |
| H | 4.57237300  | 3.35293600  | 2.88587100  |
| H | 3.99952900  | 2.70597200  | 4.43381700  |
| H | 5.22834300  | 1.81989500  | 3.45824600  |
| H | 5.24929400  | 3.01037100  | -2.43886400 |
| H | 4.00397800  | 4.09399900  | -3.16179800 |
| H | 4.50041400  | 4.28723100  | -1.47499700 |
| H | 5.26928200  | -2.94470600 | 2.46980900  |
| H | 4.05102500  | -4.06429600 | 3.18481000  |
| H | 4.56417100  | -4.24073800 | 1.50001300  |
| H | 5.27176400  | -1.78122400 | -3.40853300 |
| H | 4.58348900  | -3.32763900 | -2.91015400 |
| H | 4.06282900  | -2.62061600 | -4.44921100 |
| H | -3.96623100 | -4.38417700 | 2.79697000  |
| H | -5.08835700 | -2.98639900 | 2.69707500  |
| H | -4.87175600 | -4.02598600 | 1.29939500  |
| H | -3.92839800 | -3.16086700 | -4.15528100 |
| H | -4.89122600 | -3.19967500 | -2.64462800 |
| H | -5.01640400 | -1.81015900 | -3.70900100 |

**Ir(CO)<sub>2</sub>@NU-1000**

Electronic Energy: -3653.727525

Enthalpy: -3653.080961

Free Energy: -3653.228027

|    |             |             |             |
|----|-------------|-------------|-------------|
| C  | 4.75049900  | 16.93540100 | 13.59150200 |
| C  | 15.11750500 | 17.51770700 | 13.47070800 |
| C  | 7.65139700  | 21.95139900 | 13.52460100 |
| C  | 12.30939100 | 12.71058900 | 13.47590900 |
| C  | 5.99458200  | 16.91131500 | 14.42099500 |
| C  | 13.84205700 | 17.49262500 | 14.24868900 |
| C  | 8.27870000  | 20.84290400 | 14.30839400 |
| C  | 11.67340600 | 13.80127400 | 14.27539000 |
| H  | 13.07780300 | 18.79401300 | 16.52233400 |
| H  | 8.25382500  | 18.19993800 | 13.71936000 |
| H  | 7.16510100  | 13.79209900 | 14.92594900 |
| H  | 11.94767900 | 20.81373000 | 16.20017500 |
| H  | 11.26789400 | 21.41315300 | 14.90403500 |
| H  | 9.91169600  | 15.38827900 | 12.34812200 |
| H  | 11.38376100 | 18.39266400 | 12.16705200 |
| H  | 9.80236500  | 16.95380600 | 12.54054900 |
| O  | 6.13070100  | 17.83383400 | 15.27309300 |
| O  | 13.74928000 | 16.62858600 | 15.16626800 |
| O  | 7.52238900  | 20.24235800 | 15.12835200 |
| O  | 12.36149700 | 14.28179400 | 15.22006400 |
| O  | 6.84919800  | 16.00969200 | 14.18721600 |
| O  | 12.93642300 | 18.31218000 | 13.92996600 |
| O  | 9.48892800  | 20.55530100 | 14.10305900 |
| O  | 10.50605300 | 14.17308900 | 13.96829600 |
| O  | 8.02027000  | 13.88653200 | 15.35920500 |
| O  | 11.88428000 | 20.72492200 | 15.18888300 |
| O  | 9.29816800  | 16.07626100 | 12.63994000 |
| O  | 10.56216800 | 18.36559700 | 12.66894600 |
| O  | 8.72218200  | 17.91772300 | 14.51074300 |
| O  | 10.85072400 | 16.70727400 | 15.12325400 |
| O  | 12.20169000 | 18.39656100 | 16.51823100 |
| O  | 9.77366800  | 19.08830900 | 16.52166000 |
| Zr | 8.99533300  | 15.67477100 | 14.89108700 |
| Zr | 10.82775200 | 18.73748400 | 14.71221000 |
| C  | 15.11098300 | 17.57701000 | 19.68442800 |
| C  | 4.76731400  | 16.97131000 | 19.63402200 |
| C  | 12.35368000 | 12.73390300 | 19.69492000 |
| C  | 7.66550700  | 22.01628700 | 19.56352200 |
| C  | 13.84592900 | 17.57877200 | 18.88996800 |
| C  | 6.04699800  | 16.98756800 | 18.85832400 |
| C  | 11.73966100 | 13.85285000 | 18.91946200 |
| C  | 8.31079100  | 20.94298800 | 18.74286500 |
| H  | 10.20973100 | 13.84535500 | 16.65458000 |
| H  | 8.25529000  | 18.37746000 | 19.37241500 |
| H  | 7.05155100  | 14.11578700 | 18.27852000 |

|    |             |             |             |
|----|-------------|-------------|-------------|
| H  | 11.61863800 | 21.47680000 | 18.24981200 |
| H  | 9.95456500  | 15.54819000 | 20.95854000 |
| H  | 11.58545800 | 18.44377400 | 20.83907000 |
| O  | 13.76662000 | 16.72531700 | 17.95782300 |
| O  | 6.18735400  | 17.92125700 | 18.01882200 |
| O  | 12.42898000 | 14.34687600 | 17.98716000 |
| O  | 7.57522600  | 20.35499800 | 17.89446800 |
| O  | 12.94701300 | 18.40771300 | 19.18917800 |
| O  | 6.92359300  | 16.10729500 | 19.10866300 |
| O  | 10.58659300 | 14.25383200 | 19.26108800 |
| O  | 9.51437400  | 20.65374600 | 18.97603800 |
| O  | 11.94234100 | 20.68688400 | 17.80399300 |
| O  | 7.95379000  | 13.93289400 | 17.98297400 |
| O  | 10.71343400 | 18.64017400 | 20.47520500 |
| O  | 9.33382900  | 16.17605100 | 20.56928900 |
| O  | 10.90612700 | 16.81696300 | 18.04268500 |
| O  | 8.79083700  | 18.06165600 | 18.63145300 |
| O  | 8.30663500  | 16.55071100 | 16.64122700 |
| O  | 10.12248300 | 14.80351700 | 16.65619600 |
| Zr | 10.89011100 | 18.95231900 | 18.30086200 |
| Zr | 9.14946500  | 15.84814300 | 18.42603200 |
| Zr | 12.14725400 | 16.04583500 | 16.58016900 |
| Zr | 7.79020800  | 18.57001100 | 16.57461700 |
| H  | 8.39768100  | 22.56729700 | 13.01251900 |
| H  | 6.98855200  | 21.51349100 | 12.76570200 |
| H  | 7.01988900  | 22.57058400 | 14.17194600 |
| H  | 13.08194400 | 13.15337400 | 20.40315200 |
| H  | 11.60537600 | 12.17180700 | 20.26264700 |
| H  | 12.91335100 | 12.06543900 | 19.03111700 |
| H  | 15.97102900 | 17.68676200 | 19.01197100 |
| H  | 15.12849700 | 18.37346900 | 20.43479500 |
| H  | 15.23261200 | 16.60361700 | 20.17776700 |
| H  | 4.51902700  | 15.94956900 | 13.17480200 |
| H  | 3.90117300  | 17.32363400 | 14.16388500 |
| H  | 4.91245500  | 17.62248100 | 12.74896000 |
| H  | 12.57751300 | 11.87854700 | 14.13943000 |
| H  | 11.65307800 | 12.34285300 | 12.68104600 |
| H  | 13.25187900 | 13.07105500 | 13.04368200 |
| H  | 8.40522300  | 22.65930600 | 20.05144500 |
| H  | 6.97314800  | 22.61125700 | 18.95736700 |
| H  | 7.06561600  | 21.53498900 | 20.34928100 |
| H  | 15.97863800 | 17.40442800 | 14.13951700 |
| H  | 15.13660900 | 16.65424700 | 12.79126400 |
| H  | 15.21416400 | 18.43163400 | 12.87650700 |
| H  | 4.86140800  | 17.67981800 | 20.46959600 |
| H  | 3.93058900  | 17.31253200 | 19.01522700 |
| H  | 4.55860000  | 15.98503700 | 20.06229800 |
| Ir | 9.09922100  | 17.97969700 | 21.62396200 |
| H  | 7.90261400  | 13.82531700 | 16.97380000 |
| C  | 7.64266300  | 17.32120300 | 22.52989400 |
| C  | 8.93907700  | 19.61054200 | 22.44944300 |
| O  | 6.71520500  | 16.89289700 | 23.07044900 |
| O  | 8.84552100  | 20.65016400 | 22.94487800 |

### Catalytic Hydrogenation Mechanism on NU-1000 (Figure 3)

#### Ir(C<sub>2</sub>H<sub>4</sub>)<sub>2</sub>@NU-1000

Electronic Energy: -3584.2779276

Enthalpy: -3583.539158

Free Energy: -3583.688069

|    |             |             |             |
|----|-------------|-------------|-------------|
| C  | 4.75050000  | 16.93540000 | 13.59150000 |
| C  | 15.11750000 | 17.51770000 | 13.47070000 |
| C  | 7.65140000  | 21.95140000 | 13.52460000 |
| C  | 12.30940000 | 12.71060000 | 13.47590000 |
| C  | 5.99460000  | 16.91130000 | 14.42100100 |
| C  | 13.84200000 | 17.49260000 | 14.24870000 |
| C  | 8.27870000  | 20.84290000 | 14.30840000 |
| C  | 11.67340000 | 13.80130000 | 14.27540000 |
| H  | 13.07675000 | 18.79309700 | 16.52196500 |
| H  | 8.25382900  | 18.20080900 | 13.72311400 |
| H  | 7.16481600  | 13.79743300 | 14.92972700 |
| H  | 11.94708600 | 20.81101300 | 16.20983000 |
| H  | 11.26587200 | 21.41248800 | 14.91322900 |
| H  | 9.91445000  | 15.38931400 | 12.36033000 |
| H  | 11.38746800 | 18.39073600 | 12.17900300 |
| H  | 9.80328100  | 16.95503600 | 12.54837200 |
| O  | 6.12939000  | 17.83348600 | 15.27406500 |
| O  | 13.75062400 | 16.62841500 | 15.16648700 |
| O  | 7.52236200  | 20.24454300 | 15.13042000 |
| O  | 12.36190300 | 14.28043900 | 15.22065600 |
| O  | 6.84896000  | 16.00934600 | 14.18869900 |
| O  | 12.93664100 | 18.31291400 | 13.93172700 |
| O  | 9.48939400  | 20.55638300 | 14.10567400 |
| O  | 10.50592700 | 14.17310200 | 13.96929800 |
| O  | 8.02056800  | 13.88890800 | 15.36234900 |
| O  | 11.88215000 | 20.72383200 | 15.19685300 |
| O  | 9.29855100  | 16.07771300 | 12.64636300 |
| O  | 10.56279800 | 18.36783100 | 12.67603200 |
| O  | 8.72088500  | 17.91955600 | 14.51550800 |
| O  | 10.85120200 | 16.70755600 | 15.12445600 |
| O  | 12.20120200 | 18.39455700 | 16.51979300 |
| O  | 9.76761200  | 19.08211600 | 16.53332100 |
| Zr | 8.99486900  | 15.67908400 | 14.89942900 |
| Zr | 10.82530800 | 18.73793600 | 14.72091000 |
| C  | 15.11100000 | 17.57700000 | 19.68440000 |
| C  | 4.76730000  | 16.97130000 | 19.63400000 |
| C  | 12.35370000 | 12.73390000 | 19.69490000 |
| C  | 7.66550000  | 22.01630000 | 19.56350000 |
| C  | 13.84600000 | 17.57890000 | 18.89000000 |
| C  | 6.04690000  | 16.98740000 | 18.85830000 |
| C  | 11.73960000 | 13.85270000 | 18.91950000 |
| C  | 8.31090000  | 20.94320000 | 18.74290000 |
| H  | 10.21179300 | 13.84737700 | 16.65288200 |



|    |             |             |             |
|----|-------------|-------------|-------------|
| H  | 8.29208000  | 18.35993900 | 19.44214800 |
| H  | 7.05388600  | 14.12589900 | 18.27682900 |
| H  | 11.61392400 | 21.47609400 | 18.24563800 |
| O  | 13.76311100 | 16.71920300 | 17.96398200 |
| O  | 6.18758500  | 17.92817900 | 18.02732000 |
| O  | 12.43099900 | 14.35098000 | 17.99136700 |
| O  | 7.56775500  | 20.34714600 | 17.90699300 |
| O  | 12.95974900 | 18.42275000 | 19.17755200 |
| O  | 6.91267500  | 16.09503100 | 19.09298500 |
| O  | 10.58127000 | 14.23945500 | 19.25395300 |
| O  | 9.51997100  | 20.67238300 | 18.95757400 |
| O  | 11.94698400 | 20.68680500 | 17.80595000 |
| O  | 7.95561000  | 13.92928000 | 17.98844000 |
| O  | 10.91117200 | 16.81529500 | 18.04792000 |
| O  | 8.80177300  | 18.05707900 | 18.67826200 |
| O  | 8.30872000  | 16.55890800 | 16.65052600 |
| O  | 10.12397100 | 14.80538000 | 16.65744600 |
| Zr | 10.89562500 | 18.94872800 | 18.31417800 |
| Zr | 9.15616100  | 15.84594400 | 18.43832700 |
| Zr | 12.14763100 | 16.04607500 | 16.58260400 |
| Zr | 7.78981400  | 18.57036700 | 16.58391200 |
| H  | 8.39607200  | 22.55514900 | 12.99595500 |
| H  | 6.96980300  | 21.51581300 | 12.78123100 |
| H  | 7.03826100  | 22.58307600 | 14.17773800 |
| H  | 13.07173900 | 13.15349900 | 20.41349700 |
| H  | 11.60321200 | 12.16359300 | 20.25153100 |
| H  | 12.92441700 | 12.07255100 | 19.03331300 |
| H  | 15.96990300 | 17.69281700 | 19.01128500 |
| H  | 15.12723000 | 18.37151600 | 20.43689300 |
| H  | 15.23746600 | 16.60256000 | 20.17434400 |
| H  | 4.52062400  | 15.95030700 | 13.17206300 |
| H  | 3.90058300  | 17.32037600 | 14.16527100 |
| H  | 4.91061500  | 17.62528800 | 12.75089700 |
| H  | 12.56351900 | 11.87273200 | 14.13772100 |
| H  | 11.65820800 | 12.35167400 | 12.67276200 |
| H  | 13.25922600 | 13.06557700 | 13.05550700 |
| H  | 8.40181700  | 22.62173500 | 20.10231500 |
| H  | 7.03108100  | 22.65500200 | 18.93737200 |
| H  | 6.99946300  | 21.54090500 | 20.29759600 |
| H  | 15.97869400 | 17.42244800 | 14.14241200 |
| H  | 15.14618500 | 16.64400900 | 12.80487300 |
| H  | 15.20715900 | 18.42392700 | 12.86372700 |
| H  | 4.76596700  | 17.82260300 | 20.32899200 |
| H  | 3.91246100  | 17.11894800 | 18.96315900 |
| H  | 4.64240900  | 16.04900700 | 20.21111400 |
| H  | 7.90746600  | 13.82354300 | 16.97967700 |
| H  | 11.64297800 | 18.61976800 | 20.83050000 |
| H  | 9.84130200  | 15.41369800 | 20.95373700 |
| O  | 10.75096400 | 18.70604400 | 20.47264100 |
| O  | 9.30000900  | 16.11313100 | 20.56813300 |
| Ir | 9.28225300  | 17.88171100 | 21.75620200 |
| C  | 7.40225600  | 17.28555200 | 22.44678900 |
| H  | 6.76946500  | 18.09967300 | 22.81915500 |

|   |             |             |             |
|---|-------------|-------------|-------------|
| H | 6.93412100  | 16.65700500 | 21.67933500 |
| C | 8.41583200  | 16.73634200 | 23.26556900 |
| H | 8.69516000  | 15.68124800 | 23.14875300 |
| H | 8.58280700  | 17.12380400 | 24.27715200 |
| C | 9.87484500  | 19.28624600 | 23.17266700 |
| H | 9.66508800  | 18.99687400 | 24.20874500 |
| H | 10.91926600 | 19.57631800 | 23.00009100 |
| C | 8.85543500  | 19.83464300 | 22.36067100 |
| H | 9.12897200  | 20.51572200 | 21.54581500 |
| H | 7.84618100  | 19.98160000 | 22.76284300 |

**Ir(C<sub>2</sub>H<sub>4</sub>)<sub>2</sub>H<sub>2</sub>@NU-1000**

Electronic Energy: -3585.453032

Enthalpy: -3584.695028

Free Energy: -3584.844690

|    |             |             |             |
|----|-------------|-------------|-------------|
| C  | 4.75050000  | 16.93540000 | 13.59150000 |
| C  | 15.11750000 | 17.51770000 | 13.47070000 |
| C  | 7.65140000  | 21.95140000 | 13.52460000 |
| C  | 12.30940000 | 12.71060000 | 13.47590000 |
| C  | 5.99460000  | 16.91130000 | 14.42100100 |
| C  | 13.84200000 | 17.49260000 | 14.24870000 |
| C  | 8.27870000  | 20.84290000 | 14.30840000 |
| C  | 11.67340000 | 13.80130000 | 14.27540000 |
| H  | 13.07755000 | 18.77678300 | 16.53355000 |
| H  | 8.25377000  | 18.20078700 | 13.72626200 |
| H  | 7.16469600  | 13.79761000 | 14.93125700 |
| H  | 11.95199400 | 20.79566100 | 16.22341100 |
| H  | 11.26874800 | 21.40858000 | 14.93299500 |
| H  | 9.91292600  | 15.38804600 | 12.36577500 |
| H  | 11.38766900 | 18.38838400 | 12.18487200 |
| H  | 9.80158200  | 16.95409000 | 12.55179300 |
| O  | 6.12854000  | 17.83275900 | 15.27546300 |
| O  | 13.75119800 | 16.62793600 | 15.16692700 |
| O  | 7.52371300  | 20.24714600 | 15.13415900 |
| O  | 12.36122900 | 14.27824000 | 15.22301000 |
| O  | 6.84866400  | 16.00899200 | 14.18939900 |
| O  | 12.93590700 | 18.31213600 | 13.93229500 |
| O  | 9.49016300  | 20.55691100 | 14.10786000 |
| O  | 10.50663200 | 14.17435600 | 13.96938300 |
| O  | 8.02047900  | 13.88882300 | 15.36389200 |
| O  | 11.88425300 | 20.71649300 | 15.20981100 |
| O  | 9.29680000  | 16.07687300 | 12.65035200 |
| O  | 10.56231400 | 18.36508600 | 12.68074700 |
| O  | 8.72031400  | 17.91979100 | 14.51898900 |
| O  | 10.84882600 | 16.70716700 | 15.13398400 |
| O  | 12.20055000 | 18.38171600 | 16.52277500 |
| O  | 9.76715100  | 19.07417900 | 16.54021700 |
| Zr | 8.99270200  | 15.68067700 | 14.90412500 |
| Zr | 10.82396000 | 18.73555300 | 14.72598000 |
| C  | 15.11100000 | 17.57700000 | 19.68440000 |

|    |             |             |             |
|----|-------------|-------------|-------------|
| C  | 4.76730000  | 16.97130000 | 19.63400000 |
| C  | 12.35370000 | 12.73390000 | 19.69490000 |
| C  | 7.66550000  | 22.01630000 | 19.56350000 |
| C  | 13.84600000 | 17.57890000 | 18.89000000 |
| C  | 6.04690000  | 16.98740000 | 18.85830000 |
| C  | 11.73960000 | 13.85270000 | 18.91950000 |
| C  | 8.31090000  | 20.94320000 | 18.74290000 |
| H  | 10.21148000 | 13.85257100 | 16.66205800 |
| H  | 8.43621000  | 18.35577100 | 19.51298000 |
| H  | 7.04687300  | 14.13687700 | 18.27051800 |
| H  | 11.53071000 | 21.47118800 | 18.20183200 |
| O  | 13.75304400 | 16.69817600 | 17.98192600 |
| O  | 6.19447600  | 17.93963600 | 18.03985700 |
| O  | 12.43726000 | 14.35520100 | 17.99876800 |
| O  | 7.56019200  | 20.32865700 | 17.92634300 |
| O  | 12.97365800 | 18.44104500 | 19.15672700 |
| O  | 6.89621800  | 16.07919300 | 19.07091200 |
| O  | 10.56658500 | 14.20891100 | 19.22746400 |
| O  | 9.52821800  | 20.69961700 | 18.92746300 |
| O  | 11.94020400 | 20.68590000 | 17.82294500 |
| O  | 7.94785200  | 13.92381100 | 17.99048400 |
| O  | 10.92850200 | 16.79969700 | 18.09115800 |
| O  | 8.82494000  | 18.03582300 | 18.69395800 |
| O  | 8.30709800  | 16.56223100 | 16.65546200 |
| O  | 10.12299500 | 14.81049500 | 16.65972000 |
| Zr | 10.89542900 | 18.93693000 | 18.32314100 |
| Zr | 9.14754500  | 15.84067600 | 18.44739700 |
| Zr | 12.14868600 | 16.04286200 | 16.58827200 |
| Zr | 7.78640200  | 18.57001600 | 16.59407100 |
| H  | 8.39357500  | 22.53926900 | 12.97503700 |
| H  | 6.94634800  | 21.51920000 | 12.80153800 |
| H  | 7.06204900  | 22.59881100 | 14.18445000 |
| H  | 13.29238900 | 13.07400100 | 20.15267200 |
| H  | 11.68246200 | 12.35015800 | 20.46959900 |
| H  | 12.62703800 | 11.91890300 | 19.01233000 |
| H  | 15.97824100 | 17.52945800 | 19.01457600 |
| H  | 15.18780700 | 18.45377200 | 20.33559900 |
| H  | 15.14776700 | 16.66855400 | 20.30227200 |
| H  | 4.52358500  | 15.95154700 | 13.16758300 |
| H  | 3.89955500  | 17.31486600 | 14.16745700 |
| H  | 4.90784200  | 17.63006500 | 12.75431100 |
| H  | 12.55223000 | 11.86809500 | 14.13614000 |
| H  | 11.66234300 | 12.35905600 | 12.66616400 |
| H  | 13.26502000 | 13.06106500 | 13.06509600 |
| H  | 8.40525500  | 22.66926200 | 20.03799900 |
| H  | 6.96680100  | 22.60474000 | 18.95767100 |
| H  | 7.06888500  | 21.53977200 | 20.35454400 |
| H  | 15.97869600 | 17.42509200 | 14.14278800 |
| H  | 15.14741400 | 16.64254200 | 12.80687300 |
| H  | 15.20614500 | 18.42277000 | 12.86182300 |
| H  | 4.79665900  | 17.77610100 | 20.38206200 |
| H  | 3.91722400  | 17.18970400 | 18.97716500 |
| H  | 4.61289100  | 16.02128400 | 20.15611900 |

|    |             |             |             |
|----|-------------|-------------|-------------|
| H  | 7.90531600  | 13.81863200 | 16.98169500 |
| C  | 8.29064700  | 17.31300700 | 23.10295300 |
| C  | 8.26562900  | 18.29247700 | 22.09803200 |
| C  | 12.36008100 | 17.21916200 | 22.24902300 |
| C  | 11.92182400 | 16.24322100 | 21.35034900 |
| H  | 11.20044800 | 19.46811300 | 20.90894800 |
| H  | 9.49419600  | 15.08766000 | 20.87221400 |
| H  | 10.61589300 | 18.35361200 | 23.18914400 |
| H  | 10.18145400 | 16.18608700 | 23.17556700 |
| H  | 7.79352900  | 16.35546400 | 22.92763800 |
| H  | 8.41032900  | 17.58664600 | 24.15322300 |
| H  | 8.38262500  | 19.35460700 | 22.32707700 |
| H  | 7.72986100  | 18.05893700 | 21.17274200 |
| H  | 12.77509700 | 18.15559300 | 21.86602100 |
| H  | 12.66210800 | 16.95443500 | 23.26438900 |
| H  | 11.85406700 | 15.19571700 | 21.65769900 |
| H  | 11.93981600 | 16.42409700 | 20.27088800 |
| Ir | 10.18524500 | 17.31898800 | 22.07723000 |
| O  | 10.66266300 | 18.79653400 | 20.47586700 |
| O  | 9.18023500  | 15.95683100 | 20.59210300 |

### TS1@NU-1000

Electronic Energy: -3585.434354

Enthalpy: -3584.678941

Free Energy: -3584.826596

|   |           |           |           |
|---|-----------|-----------|-----------|
| C | 4.750487  | 16.935395 | 13.591518 |
| C | 15.117496 | 17.517693 | 13.470694 |
| C | 7.651401  | 21.951410 | 13.524613 |
| C | 12.309410 | 12.710614 | 13.475889 |
| C | 5.994651  | 16.911305 | 14.421007 |
| C | 13.842041 | 17.492630 | 14.248689 |
| C | 8.278695  | 20.842886 | 14.308396 |
| C | 11.673374 | 13.801191 | 14.275399 |
| H | 13.075911 | 18.792438 | 16.522149 |
| H | 8.251717  | 18.198950 | 13.724098 |
| H | 7.163850  | 13.798233 | 14.932746 |
| H | 11.945000 | 20.811900 | 16.206069 |
| H | 11.265630 | 21.410647 | 14.906788 |
| H | 9.914376  | 15.387800 | 12.360586 |
| H | 11.387382 | 18.385847 | 12.178059 |
| H | 9.802375  | 16.953700 | 12.547963 |
| O | 6.130448  | 17.834319 | 15.272751 |
| O | 13.751380 | 16.628600 | 15.166552 |
| O | 7.522902  | 20.245123 | 15.131225 |
| O | 12.361960 | 14.280581 | 15.220222 |
| O | 6.847849  | 16.007908 | 14.189180 |
| O | 12.936185 | 18.311635 | 13.930312 |
| O | 9.488455  | 20.555066 | 14.102315 |
| O | 10.505298 | 14.171963 | 13.969910 |
| O | 8.020217  | 13.888024 | 15.364501 |

|    |           |           |           |
|----|-----------|-----------|-----------|
| O  | 11.882525 | 20.723216 | 15.191934 |
| O  | 9.297844  | 16.075885 | 12.645958 |
| O  | 10.562162 | 18.364651 | 12.674242 |
| O  | 8.720467  | 17.917746 | 14.515468 |
| O  | 10.850114 | 16.706879 | 15.126492 |
| O  | 12.200729 | 18.393165 | 16.518620 |
| O  | 9.767886  | 19.085319 | 16.526966 |
| Zr | 8.994884  | 15.677883 | 14.899169 |
| Zr | 10.825548 | 18.737676 | 14.719419 |
| C  | 15.111037 | 17.577042 | 19.684341 |
| C  | 4.767259  | 16.971156 | 19.633929 |
| C  | 12.353679 | 12.733905 | 19.694924 |
| C  | 7.665582  | 22.016380 | 19.563460 |
| C  | 13.845798 | 17.578839 | 18.890101 |
| C  | 6.047188  | 16.987856 | 18.858370 |
| C  | 11.739665 | 13.852697 | 18.919408 |
| C  | 8.310636  | 20.942900 | 18.742964 |
| H  | 10.210931 | 13.848701 | 16.658868 |
| H  | 8.394529  | 18.339524 | 19.477173 |
| H  | 7.054294  | 14.131103 | 18.279634 |
| H  | 11.616679 | 21.481116 | 18.240193 |
| H  | 9.894593  | 15.391118 | 20.904916 |
| H  | 11.636156 | 18.520012 | 20.749075 |
| O  | 13.765120 | 16.719804 | 17.963030 |
| O  | 6.180481  | 17.920550 | 18.019785 |
| O  | 12.429398 | 14.349341 | 17.989608 |
| O  | 7.566106  | 20.347975 | 17.906360 |
| O  | 12.958492 | 18.421426 | 19.177197 |
| O  | 6.917267  | 16.102562 | 19.105439 |
| O  | 10.582950 | 14.242441 | 19.257182 |
| O  | 9.517655  | 20.671894 | 18.959190 |
| O  | 11.942837 | 20.691206 | 17.796748 |
| O  | 7.955838  | 13.935005 | 17.991217 |
| O  | 10.740264 | 18.737142 | 20.464477 |
| O  | 9.272718  | 16.062558 | 20.599229 |
| O  | 10.921607 | 16.809845 | 18.058178 |
| O  | 8.811153  | 18.052583 | 18.653304 |
| O  | 8.306864  | 16.555256 | 16.650445 |
| O  | 10.123948 | 14.806774 | 16.659454 |
| Zr | 10.893063 | 18.952685 | 18.314240 |
| Zr | 9.159341  | 15.853821 | 18.436910 |
| Zr | 12.149092 | 16.046954 | 16.583322 |
| Zr | 7.792453  | 18.571856 | 16.586002 |
| H  | 8.397029  | 22.561297 | 13.004348 |
| H  | 6.979449  | 21.514728 | 12.773067 |
| H  | 7.028899  | 22.576945 | 14.174714 |
| H  | 12.970353 | 13.160278 | 20.498895 |
| H  | 11.591949 | 12.099022 | 20.159630 |
| H  | 13.019973 | 12.137816 | 19.062377 |
| H  | 15.127233 | 18.372023 | 20.436339 |
| H  | 15.236374 | 16.603117 | 20.175522 |
| H  | 15.969780 | 17.691579 | 19.010836 |
| H  | 4.516260  | 15.948467 | 13.178720 |

|    |           |           |           |
|----|-----------|-----------|-----------|
| H  | 3.902207  | 17.328071 | 14.162470 |
| H  | 4.913798  | 17.618308 | 12.745834 |
| H  | 12.554997 | 11.869272 | 14.136599 |
| H  | 11.661434 | 12.356983 | 12.667788 |
| H  | 13.263636 | 13.062217 | 13.062812 |
| H  | 8.404670  | 22.641660 | 20.075067 |
| H  | 7.002319  | 22.634237 | 18.946917 |
| H  | 7.030334  | 21.538967 | 20.323471 |
| H  | 15.208002 | 18.424705 | 12.864974 |
| H  | 15.978786 | 17.420458 | 14.141989 |
| H  | 15.144934 | 16.645077 | 12.803384 |
| H  | 4.730867  | 17.858210 | 20.281561 |
| H  | 3.910889  | 17.056502 | 18.953719 |
| H  | 4.664817  | 16.073532 | 20.253275 |
| H  | 7.907274  | 13.828534 | 16.982537 |
| Ir | 9.411987  | 17.752073 | 21.896910 |
| C  | 10.237396 | 19.027909 | 23.366775 |
| H  | 10.156060 | 18.609465 | 24.373822 |
| H  | 11.247542 | 19.343104 | 23.093262 |
| C  | 9.129662  | 19.655127 | 22.752798 |
| H  | 9.301878  | 20.428721 | 21.997616 |
| H  | 8.179609  | 19.733428 | 23.293421 |
| C  | 7.318835  | 17.296167 | 22.314502 |
| H  | 6.638276  | 18.094661 | 22.629958 |
| H  | 6.877257  | 16.606662 | 21.587109 |
| C  | 8.240495  | 16.746598 | 23.280611 |
| H  | 8.399536  | 15.663061 | 23.270365 |
| H  | 8.254548  | 17.179177 | 24.288618 |
| H  | 7.912546  | 18.194514 | 21.193888 |
| H  | 10.827717 | 17.081310 | 22.378202 |

**Ir(C<sub>2</sub>H<sub>5</sub>) (C<sub>2</sub>H<sub>4</sub>) H@NU-1000**

Electronic Energy: -3585.459815

Enthalpy: -3584.700407

Free Energy: -3584.852553

|   |           |           |           |
|---|-----------|-----------|-----------|
| C | 4.750501  | 16.935400 | 13.591497 |
| C | 15.117501 | 17.517697 | 13.470702 |
| C | 7.651396  | 21.951389 | 13.524588 |
| C | 12.309406 | 12.710610 | 13.475892 |
| C | 5.994659  | 16.911302 | 14.421026 |
| C | 13.841964 | 17.492596 | 14.248723 |
| C | 8.278727  | 20.842856 | 14.308403 |
| C | 11.673419 | 13.801355 | 14.275414 |
| H | 13.076292 | 18.787661 | 16.531484 |
| H | 8.264960  | 18.203940 | 13.716995 |
| H | 7.168442  | 13.795007 | 14.918658 |
| H | 11.951418 | 20.811185 | 16.227936 |
| H | 11.275260 | 21.419554 | 14.929716 |
| H | 9.920264  | 15.398011 | 12.362089 |
| H | 11.391138 | 18.404888 | 12.192919 |

|    |           |           |           |
|----|-----------|-----------|-----------|
| H  | 9.811963  | 16.963695 | 12.556309 |
| O  | 6.127281  | 17.831772 | 15.276830 |
| O  | 13.746983 | 16.627193 | 15.165479 |
| O  | 7.517787  | 20.242631 | 15.126594 |
| O  | 12.358287 | 14.280175 | 15.223630 |
| O  | 6.851826  | 16.013409 | 14.186284 |
| O  | 12.939270 | 18.319095 | 13.938659 |
| O  | 9.490436  | 20.559644 | 14.115707 |
| O  | 10.506617 | 14.175263 | 13.966624 |
| O  | 8.022051  | 13.889034 | 15.354864 |
| O  | 11.884144 | 20.724833 | 15.213660 |
| O  | 9.305201  | 16.086668 | 12.649509 |
| O  | 10.566645 | 18.377996 | 12.690053 |
| O  | 8.722484  | 17.923304 | 14.515212 |
| O  | 10.850131 | 16.710231 | 15.126751 |
| O  | 12.198876 | 18.392955 | 16.533057 |
| O  | 9.761768  | 19.079916 | 16.550084 |
| Zr | 8.997330  | 15.679472 | 14.899577 |
| Zr | 10.829946 | 18.741870 | 14.736866 |
| C  | 15.111007 | 17.576993 | 19.684389 |
| C  | 4.767307  | 16.971331 | 19.634012 |
| C  | 12.353714 | 12.733864 | 19.694837 |
| C  | 7.665482  | 22.016322 | 19.563458 |
| C  | 13.846029 | 17.579108 | 18.890035 |
| C  | 6.046836  | 16.987188 | 18.858391 |
| C  | 11.739465 | 13.852444 | 18.919474 |
| C  | 8.310987  | 20.943446 | 18.742858 |
| H  | 10.216562 | 13.848210 | 16.652397 |
| H  | 7.997184  | 18.441452 | 19.184139 |
| H  | 7.049986  | 14.117095 | 18.264857 |
| H  | 11.649721 | 21.476768 | 18.266006 |
| H  | 9.792173  | 15.433642 | 21.072394 |
| H  | 11.597592 | 18.480747 | 20.876600 |
| O  | 13.755095 | 16.713371 | 17.969478 |
| O  | 6.212612  | 17.952073 | 18.054972 |
| O  | 12.434762 | 14.365168 | 18.001435 |
| O  | 7.562596  | 20.322104 | 17.927890 |
| O  | 12.964216 | 18.424107 | 19.179301 |
| O  | 6.898902  | 16.077919 | 19.072606 |
| O  | 10.571147 | 14.218941 | 19.237490 |
| O  | 9.524789  | 20.687560 | 18.945255 |
| O  | 11.958674 | 20.684171 | 17.814803 |
| O  | 7.952218  | 13.918535 | 17.978559 |
| O  | 10.751958 | 18.679727 | 20.463475 |
| O  | 9.361298  | 16.115351 | 20.547836 |
| O  | 10.879358 | 16.828623 | 18.045122 |
| O  | 8.780407  | 18.059723 | 18.766869 |
| O  | 8.305657  | 16.561352 | 16.652390 |
| O  | 10.122143 | 14.805674 | 16.657259 |
| Zr | 10.904325 | 18.957784 | 18.353335 |
| Zr | 9.151684  | 15.829162 | 18.443606 |
| Zr | 12.141778 | 16.051670 | 16.590227 |
| Zr | 7.800193  | 18.567823 | 16.559151 |

|    |           |           |           |
|----|-----------|-----------|-----------|
| H  | 8.393898  | 22.541870 | 12.978389 |
| H  | 6.949387  | 21.518534 | 12.799026 |
| H  | 7.058678  | 22.596282 | 14.183857 |
| H  | 13.056725 | 13.153872 | 20.427992 |
| H  | 11.599974 | 12.152407 | 20.235105 |
| H  | 12.940750 | 12.083511 | 19.036585 |
| H  | 15.978675 | 17.518555 | 19.016357 |
| H  | 15.191038 | 18.458336 | 20.328356 |
| H  | 15.143484 | 16.673802 | 20.309369 |
| H  | 4.525862  | 15.952706 | 13.163832 |
| H  | 3.898493  | 17.311162 | 14.168285 |
| H  | 4.907281  | 17.633625 | 12.757192 |
| H  | 12.560928 | 11.871512 | 14.137133 |
| H  | 11.659060 | 12.353884 | 12.671136 |
| H  | 13.260588 | 13.064673 | 13.057819 |
| H  | 8.406004  | 22.688954 | 20.009128 |
| H  | 6.942829  | 22.584321 | 18.965904 |
| H  | 7.100375  | 21.547120 | 20.380419 |
| H  | 15.978073 | 17.444145 | 14.146101 |
| H  | 15.158516 | 16.632432 | 12.821153 |
| H  | 15.198666 | 18.414934 | 12.849501 |
| H  | 4.923085  | 17.541929 | 20.561044 |
| H  | 3.959221  | 17.456172 | 19.076828 |
| H  | 4.483374  | 15.954582 | 19.926830 |
| Ir | 8.879280  | 17.954249 | 21.433050 |
| H  | 7.906478  | 13.814979 | 16.969570 |
| C  | 8.855357  | 19.915200 | 22.155046 |
| H  | 9.411277  | 20.028287 | 23.093763 |
| H  | 9.175225  | 20.604116 | 21.368285 |
| C  | 7.545753  | 19.377719 | 22.187901 |
| H  | 6.799704  | 19.661236 | 21.432071 |
| H  | 7.089753  | 19.106133 | 23.146557 |
| C  | 9.441900  | 17.371958 | 23.316296 |
| H  | 8.902923  | 17.962659 | 24.078110 |
| H  | 9.118539  | 16.324911 | 23.448214 |
| C  | 10.936993 | 17.500261 | 23.489779 |
| H  | 11.492322 | 16.888829 | 22.760304 |
| H  | 11.282428 | 18.538995 | 23.376840 |
| H  | 7.555249  | 17.207722 | 21.840225 |
| H  | 11.257269 | 17.163372 | 24.490481 |

### TS2@NU-1000

Electronic Energy: -3585.44487

Enthalpy: -3584.686753

Free Energy: -3584.837529

|   |           |           |           |
|---|-----------|-----------|-----------|
| C | 4.750501  | 16.935400 | 13.591497 |
| C | 15.117501 | 17.517697 | 13.470702 |
| C | 7.651396  | 21.951389 | 13.524588 |
| C | 12.309406 | 12.710610 | 13.475892 |
| C | 5.994659  | 16.911302 | 14.421026 |



|    |           |           |           |
|----|-----------|-----------|-----------|
| C  | 13.841964 | 17.492596 | 14.248723 |
| C  | 8.278727  | 20.842856 | 14.308403 |
| C  | 11.673419 | 13.801355 | 14.275414 |
| H  | 13.075084 | 18.791662 | 16.525597 |
| H  | 8.253803  | 18.202472 | 13.723262 |
| H  | 7.164048  | 13.798825 | 14.924857 |
| H  | 11.945343 | 20.809200 | 16.213715 |
| H  | 11.263656 | 21.412093 | 14.918300 |
| H  | 9.916930  | 15.390991 | 12.359583 |
| H  | 11.388743 | 18.391245 | 12.179261 |
| H  | 9.804065  | 16.956630 | 12.547332 |
| O  | 6.129401  | 17.833406 | 15.273687 |
| O  | 13.749691 | 16.627590 | 15.165437 |
| O  | 7.522173  | 20.244261 | 15.129585 |
| O  | 12.361248 | 14.279825 | 15.221317 |
| O  | 6.848992  | 16.009570 | 14.186968 |
| O  | 12.937432 | 18.314409 | 13.932918 |
| O  | 9.489716  | 20.557119 | 14.105556 |
| O  | 10.506442 | 14.173678 | 13.968021 |
| O  | 8.019655  | 13.888172 | 15.358220 |
| O  | 11.881873 | 20.724468 | 15.200260 |
| O  | 9.299746  | 16.078762 | 12.644331 |
| O  | 10.563528 | 18.368536 | 12.675375 |
| O  | 8.721367  | 17.920147 | 14.514950 |
| O  | 10.850758 | 16.707653 | 15.124588 |
| O  | 12.199534 | 18.393164 | 16.522669 |
| O  | 9.769829  | 19.084263 | 16.530721 |
| Zr | 8.994249  | 15.679467 | 14.897155 |
| Zr | 10.825514 | 18.738895 | 14.721021 |
| C  | 15.111007 | 17.576993 | 19.684389 |
| C  | 4.767307  | 16.971331 | 19.634012 |
| C  | 12.353714 | 12.733864 | 19.694837 |
| C  | 7.665482  | 22.016322 | 19.563458 |
| C  | 13.846029 | 17.579108 | 18.890035 |
| C  | 6.046836  | 16.987188 | 18.858391 |
| C  | 11.739465 | 13.852444 | 18.919474 |
| C  | 8.310987  | 20.943446 | 18.742858 |
| H  | 10.209138 | 13.846915 | 16.651152 |
| H  | 8.338849  | 18.354514 | 19.457198 |
| H  | 7.048763  | 14.127174 | 18.273243 |
| H  | 11.615230 | 21.472036 | 18.251269 |
| H  | 9.957788  | 15.499972 | 20.891660 |
| H  | 11.618869 | 18.453998 | 20.805068 |
| O  | 13.768104 | 16.725430 | 17.958346 |
| O  | 6.183475  | 17.924565 | 18.023216 |
| O  | 12.431195 | 14.348284 | 17.990065 |
| O  | 7.569829  | 20.355818 | 17.899792 |
| O  | 12.950600 | 18.409978 | 19.189479 |
| O  | 6.913976  | 16.097759 | 19.097460 |
| O  | 10.583863 | 14.243998 | 19.257069 |
| O  | 9.518156  | 20.665650 | 18.962441 |
| O  | 11.944945 | 20.682638 | 17.809282 |
| O  | 7.949984  | 13.929171 | 17.984238 |

|    |           |           |           |
|----|-----------|-----------|-----------|
| O  | 10.736924 | 18.686356 | 20.487697 |
| O  | 9.288122  | 16.112484 | 20.562976 |
| O  | 10.913508 | 16.810751 | 18.052917 |
| O  | 8.796375  | 18.059927 | 18.653989 |
| O  | 8.304817  | 16.557068 | 16.646132 |
| O  | 10.122030 | 14.804952 | 16.656821 |
| Zr | 10.889313 | 18.946161 | 18.315894 |
| Zr | 9.147530  | 15.847019 | 18.434119 |
| Zr | 12.145371 | 16.046617 | 16.583111 |
| Zr | 7.789034  | 18.571842 | 16.586134 |
| H  | 8.396048  | 22.555525 | 12.996315 |
| H  | 6.970175  | 21.515808 | 12.780862 |
| H  | 7.037888  | 22.582760 | 14.177693 |
| H  | 13.091314 | 13.150972 | 20.394808 |
| H  | 11.607042 | 12.177309 | 20.270173 |
| H  | 12.904010 | 12.059436 | 19.028971 |
| H  | 15.970758 | 17.691010 | 19.012157 |
| H  | 15.127471 | 18.371249 | 20.437223 |
| H  | 15.235290 | 16.602263 | 20.174488 |
| H  | 4.518503  | 15.949476 | 13.175084 |
| H  | 3.901279  | 17.324045 | 14.163817 |
| H  | 4.912383  | 17.621952 | 12.748494 |
| H  | 12.565651 | 11.873522 | 14.137872 |
| H  | 11.657457 | 12.350484 | 12.673894 |
| H  | 13.258132 | 13.066440 | 13.053667 |
| H  | 8.399163  | 22.606187 | 20.122781 |
| H  | 7.053831  | 22.670963 | 18.930847 |
| H  | 6.977022  | 21.543035 | 20.277566 |
| H  | 15.978602 | 17.422154 | 14.142515 |
| H  | 15.146204 | 16.644228 | 12.804582 |
| H  | 15.207402 | 18.424166 | 12.864110 |
| H  | 4.798993  | 17.782065 | 20.375749 |
| H  | 3.915844  | 17.183911 | 18.977340 |
| H  | 4.615250  | 16.024927 | 20.163759 |
| Ir | 9.224994  | 17.913129 | 21.717830 |
| H  | 7.902196  | 13.824338 | 16.975304 |
| C  | 9.733173  | 19.333894 | 23.144272 |
| H  | 9.484147  | 19.054111 | 24.175797 |
| H  | 10.781024 | 19.630249 | 23.010282 |
| C  | 8.749187  | 19.868375 | 22.277859 |
| H  | 9.056148  | 20.560850 | 21.486327 |
| H  | 7.720150  | 20.006306 | 22.632547 |
| C  | 8.039652  | 16.925491 | 23.295118 |
| H  | 7.822855  | 17.690798 | 24.056361 |
| H  | 7.072453  | 16.415496 | 23.119247 |
| C  | 9.017990  | 15.884265 | 23.801804 |
| H  | 9.217764  | 15.113257 | 23.045632 |
| H  | 9.978905  | 16.324640 | 24.102325 |
| H  | 7.716888  | 17.509299 | 22.089843 |
| H  | 8.605793  | 15.362803 | 24.682239 |

**Ir(C<sub>2</sub>H<sub>6</sub>)(C<sub>2</sub>H<sub>4</sub>)@NU-1000**

Electronic Energy: -3585.453059

Enthalpy: -3584.691644

Free Energy: -3584.844042

|    |           |           |           |
|----|-----------|-----------|-----------|
| C  | 4.750500  | 16.935400 | 13.591500 |
| C  | 15.117500 | 17.517700 | 13.470700 |
| C  | 7.651400  | 21.951400 | 13.524600 |
| C  | 12.309400 | 12.710600 | 13.475900 |
| C  | 5.994600  | 16.911300 | 14.421001 |
| C  | 13.842000 | 17.492600 | 14.248700 |
| C  | 8.278700  | 20.842900 | 14.308400 |
| C  | 11.673400 | 13.801300 | 14.275400 |
| H  | 13.076706 | 18.792427 | 16.521134 |
| H  | 8.253187  | 18.200470 | 13.722360 |
| H  | 7.163289  | 13.798763 | 14.927851 |
| H  | 11.945391 | 20.809527 | 16.209811 |
| H  | 11.263652 | 21.410552 | 14.913471 |
| H  | 9.916202  | 15.390241 | 12.356571 |
| H  | 11.387950 | 18.390524 | 12.178121 |
| H  | 9.803874  | 16.955838 | 12.545952 |
| O  | 6.129481  | 17.833010 | 15.274203 |
| O  | 13.750940 | 16.628230 | 15.166197 |
| O  | 7.522131  | 20.244048 | 15.129574 |
| O  | 12.362090 | 14.280596 | 15.220013 |
| O  | 6.848900  | 16.009487 | 14.187228 |
| O  | 12.936630 | 18.312702 | 13.931375 |
| O  | 9.489386  | 20.556627 | 14.104914 |
| O  | 10.506034 | 14.172956 | 13.968485 |
| O  | 8.019827  | 13.888173 | 15.359381 |
| O  | 11.881910 | 20.723445 | 15.196630 |
| O  | 9.299655  | 16.077842 | 12.643020 |
| O  | 10.562812 | 18.367713 | 12.674373 |
| O  | 8.720779  | 17.918554 | 14.514190 |
| O  | 10.851256 | 16.706531 | 15.123484 |
| O  | 12.201229 | 18.393812 | 16.519277 |
| O  | 9.767458  | 19.083136 | 16.529811 |
| Zr | 8.995311  | 15.677725 | 14.895453 |
| Zr | 10.824839 | 18.737074 | 14.720080 |
| C  | 15.111000 | 17.577000 | 19.684400 |
| C  | 4.767300  | 16.971300 | 19.634000 |
| C  | 12.353700 | 12.733900 | 19.694900 |
| C  | 7.665500  | 22.016300 | 19.563500 |
| C  | 13.846000 | 17.578900 | 18.890000 |
| C  | 6.046900  | 16.987400 | 18.858300 |
| C  | 11.739600 | 13.852700 | 18.919500 |
| C  | 8.310900  | 20.943200 | 18.742900 |
| H  | 10.209492 | 13.846456 | 16.653765 |
| H  | 8.329694  | 18.316137 | 19.464693 |
| H  | 7.054457  | 14.121167 | 18.278214 |
| H  | 11.607190 | 21.477871 | 18.241160 |
| O  | 13.764918 | 16.720306 | 17.962611 |
| O  | 6.183707  | 17.924974 | 18.023166 |

|    |           |           |           |
|----|-----------|-----------|-----------|
| O  | 12.429317 | 14.344946 | 17.986716 |
| O  | 7.569772  | 20.355788 | 17.900019 |
| O  | 12.956133 | 18.417822 | 19.181369 |
| O  | 6.916152  | 16.097794 | 19.094151 |
| O  | 10.585621 | 14.249887 | 19.259573 |
| O  | 9.517065  | 20.667065 | 18.965796 |
| O  | 11.944113 | 20.687446 | 17.806758 |
| O  | 7.956053  | 13.929670 | 17.986087 |
| O  | 10.914690 | 16.811474 | 18.047605 |
| O  | 8.797136  | 18.055165 | 18.655701 |
| O  | 8.308154  | 16.555393 | 16.646280 |
| O  | 10.122978 | 14.804592 | 16.656192 |
| Zr | 10.892826 | 18.946233 | 18.312366 |
| Zr | 9.152261  | 15.849566 | 18.431461 |
| Zr | 12.147998 | 16.045142 | 16.582075 |
| Zr | 7.788641  | 18.570734 | 16.585605 |
| H  | 8.396783  | 22.560530 | 13.003094 |
| H  | 6.977879  | 21.514977 | 12.774335 |
| H  | 7.030263  | 22.577698 | 14.175290 |
| H  | 13.077291 | 13.153711 | 20.407759 |
| H  | 11.604523 | 12.168441 | 20.258228 |
| H  | 12.918096 | 12.068474 | 19.032035 |
| H  | 15.970860 | 17.685426 | 19.011354 |
| H  | 15.129469 | 18.374940 | 20.433228 |
| H  | 15.232768 | 16.604646 | 20.179757 |
| H  | 4.518984  | 15.949554 | 13.174696 |
| H  | 3.901122  | 17.323365 | 14.164044 |
| H  | 4.912035  | 17.622457 | 12.748839 |
| H  | 12.569685 | 11.875273 | 14.138497 |
| H  | 11.656044 | 12.347698 | 12.676307 |
| H  | 13.256015 | 13.068054 | 13.050298 |
| H  | 8.401264  | 22.611133 | 20.114713 |
| H  | 7.046673  | 22.666370 | 18.933459 |
| H  | 6.981184  | 21.544830 | 20.283400 |
| H  | 15.978727 | 17.421431 | 14.142228 |
| H  | 15.145612 | 16.644546 | 12.804133 |
| H  | 15.207642 | 18.424318 | 12.864352 |
| H  | 4.774782  | 17.813064 | 20.340512 |
| H  | 3.913548  | 17.134346 | 18.965527 |
| H  | 4.635774  | 16.043476 | 20.200723 |
| H  | 7.905674  | 13.824467 | 16.977360 |
| H  | 11.620012 | 18.538109 | 20.807470 |
| H  | 9.952574  | 15.506729 | 20.944459 |
| O  | 10.733000 | 18.706297 | 20.465466 |
| O  | 9.319593  | 16.135752 | 20.576059 |
| Ir | 9.251466  | 17.839282 | 21.719791 |
| C  | 7.372622  | 17.275374 | 22.416589 |
| H  | 6.749658  | 18.106131 | 22.776148 |
| H  | 6.874376  | 16.626352 | 21.686353 |
| C  | 8.385869  | 16.731402 | 23.247722 |
| H  | 8.636646  | 15.666000 | 23.164222 |
| H  | 8.556224  | 17.137268 | 24.253235 |
| C  | 9.934103  | 21.158579 | 22.539919 |

|   |           |           |           |
|---|-----------|-----------|-----------|
| H | 10.730580 | 21.197571 | 23.295926 |
| H | 10.404801 | 21.069153 | 21.552091 |
| C | 8.974771  | 20.017536 | 22.779117 |
| H | 8.227657  | 19.936317 | 21.977208 |
| H | 8.415630  | 20.089787 | 23.724919 |
| H | 9.406067  | 22.121906 | 22.574608 |
| H | 9.608700  | 19.066024 | 22.988920 |

### Catalytic Dimerization Mechanism on NU-1000 (Figure 4)

#### TS1@NU-1000

Electronic Energy: -3585.3909954

Enthalpy: -3584.634922

Free Energy: -3584.783450

|    |             |             |             |
|----|-------------|-------------|-------------|
| C  | 4.75049200  | 16.93539700 | 13.59151200 |
| C  | 15.11751000 | 17.51771800 | 13.47071600 |
| C  | 7.65140200  | 21.95140800 | 13.52461000 |
| C  | 12.30938200 | 12.71057200 | 13.47592400 |
| C  | 5.99449100  | 16.91130900 | 14.42098000 |
| C  | 13.84214400 | 17.49265900 | 14.24865500 |
| C  | 8.27865800  | 20.84295900 | 14.30837700 |
| C  | 11.67338200 | 13.80117300 | 14.27536300 |
| H  | 13.08275600 | 18.77099600 | 16.54096300 |
| H  | 8.25315200  | 18.20255900 | 13.73612500 |
| H  | 7.17119400  | 13.79284500 | 14.92152500 |
| H  | 11.94911500 | 20.80419100 | 16.21482800 |
| H  | 11.26857700 | 21.40551600 | 14.91810400 |
| H  | 9.91055300  | 15.39259900 | 12.35865100 |
| H  | 11.38614800 | 18.39061900 | 12.18312900 |
| H  | 9.80127200  | 16.95814200 | 12.55136200 |
| O  | 6.13120600  | 17.83319900 | 15.27433200 |
| O  | 13.75006900 | 16.62651900 | 15.16519300 |
| O  | 7.52380200  | 20.24213400 | 15.12997100 |
| O  | 12.36351600 | 14.27987400 | 15.22036300 |
| O  | 6.84852500  | 16.00855400 | 14.18946400 |
| O  | 12.93715400 | 18.31381500 | 13.93310800 |
| O  | 9.49088700  | 20.55863700 | 14.10841400 |
| O  | 10.50910200 | 14.17810900 | 13.96521900 |
| O  | 8.02797400  | 13.88183000 | 15.35266200 |
| O  | 11.88818100 | 20.71929700 | 15.20081200 |
| O  | 9.29651200  | 16.08060700 | 12.64942500 |
| O  | 10.56278500 | 18.36592300 | 12.68219100 |
| O  | 8.72461200  | 17.91804700 | 14.52472300 |
| O  | 10.85083900 | 16.70978900 | 15.14165500 |
| O  | 12.20436000 | 18.37913600 | 16.52757300 |
| O  | 9.78015200  | 19.08158100 | 16.54006400 |
| Zr | 8.99804600  | 15.67457600 | 14.90181900 |
| Zr | 10.83072200 | 18.73691500 | 14.72682800 |
| C  | 15.11094400 | 17.57700100 | 19.68449000 |
| C  | 4.76733500  | 16.97128200 | 19.63405500 |

|    |             |             |             |
|----|-------------|-------------|-------------|
| C  | 12.35365200 | 12.73393900 | 19.69499500 |
| C  | 7.66552900  | 22.01626900 | 19.56356300 |
| C  | 13.84574900 | 17.57841200 | 18.88997100 |
| C  | 6.04720200  | 16.98792100 | 18.85824600 |
| C  | 11.73991000 | 13.85325800 | 18.91938500 |
| C  | 8.31062000  | 20.94262300 | 18.74285700 |
| H  | 10.23478700 | 13.85192500 | 16.66586100 |
| H  | 8.40159900  | 18.30096100 | 19.48001500 |
| H  | 7.04615700  | 14.12764000 | 18.25496600 |
| H  | 11.60118700 | 21.47507000 | 18.23887600 |
| H  | 8.22534400  | 16.15039900 | 20.89246800 |
| H  | 10.13867200 | 19.60699600 | 20.76761800 |
| O  | 13.76864200 | 16.70879500 | 17.97053200 |
| O  | 6.18794700  | 17.92015200 | 18.02169300 |
| O  | 12.44897000 | 14.36061900 | 18.00385100 |
| O  | 7.58110300  | 20.35790700 | 17.89380400 |
| O  | 12.96354300 | 18.42592600 | 19.16581100 |
| O  | 6.90875700  | 16.09365300 | 19.10596900 |
| O  | 10.57104700 | 14.21647300 | 19.21979200 |
| O  | 9.51682400  | 20.66681700 | 18.98372100 |
| O  | 11.93617300 | 20.68378600 | 17.80489600 |
| O  | 7.95086400  | 13.93104900 | 17.97774100 |
| O  | 10.67043300 | 18.85033100 | 20.49691400 |
| O  | 9.12681100  | 16.07751900 | 20.56280300 |
| O  | 10.93917900 | 16.79846100 | 18.12041400 |
| O  | 8.79797100  | 18.05695600 | 18.63928600 |
| O  | 8.30989300  | 16.54657500 | 16.65467100 |
| O  | 10.13771100 | 14.80883600 | 16.65315600 |
| Zr | 10.90354400 | 18.93954100 | 18.32960100 |
| Zr | 9.16013500  | 15.83866100 | 18.45140600 |
| Zr | 12.15143900 | 16.04009100 | 16.59286100 |
| Zr | 7.79972000  | 18.56212400 | 16.58518800 |
| H  | 8.39596000  | 22.55283100 | 12.99320300 |
| H  | 6.96609100  | 21.51681600 | 12.78410700 |
| H  | 7.04192100  | 22.58547100 | 14.17894100 |
| H  | 13.25245100 | 13.09821500 | 20.21110400 |
| H  | 11.65853900 | 12.31287600 | 20.42813500 |
| H  | 12.69346800 | 11.94716700 | 19.00961100 |
| H  | 15.96395100 | 17.73641400 | 19.01178800 |
| H  | 15.11940800 | 18.34986200 | 20.46013100 |
| H  | 15.26843000 | 16.58873600 | 20.13715900 |
| H  | 4.51753100  | 15.94871600 | 13.17751500 |
| H  | 3.90173600  | 17.32616200 | 14.16307500 |
| H  | 4.91283400  | 17.61975200 | 12.74682100 |
| H  | 11.64125200 | 12.32075100 | 12.70156900 |
| H  | 13.23236000 | 13.08487600 | 13.01388800 |
| H  | 12.61247400 | 11.89339700 | 14.14257200 |
| H  | 8.40387800  | 22.70445200 | 19.98856000 |
| H  | 6.91997100  | 22.56622500 | 18.97882900 |
| H  | 7.12801800  | 21.54183900 | 20.39734300 |
| H  | 15.14006900 | 16.65073600 | 12.79591500 |
| H  | 15.21210500 | 18.42911100 | 12.87220600 |
| H  | 15.97850300 | 17.41055100 | 14.14078000 |

|    |             |             |             |
|----|-------------|-------------|-------------|
| H  | 4.82343100  | 17.73443400 | 20.42321300 |
| H  | 3.92246800  | 17.24621400 | 18.99273600 |
| H  | 4.58642000  | 16.00244600 | 20.11143800 |
| H  | 7.91218300  | 13.82273700 | 16.96950000 |
| Ir | 10.40407400 | 17.26050700 | 22.00857300 |
| C  | 11.61810400 | 18.45846100 | 23.14201000 |
| C  | 11.26868400 | 15.38071300 | 22.18795300 |
| C  | 12.64811600 | 17.77596200 | 22.36200400 |
| H  | 11.45553400 | 19.51504400 | 22.89464500 |
| H  | 11.62446900 | 18.28436300 | 24.22405300 |
| C  | 12.25414900 | 16.09939500 | 21.38713100 |
| H  | 11.59513800 | 15.05274100 | 23.18168000 |
| H  | 10.61210600 | 14.67012100 | 21.67680700 |
| H  | 13.07217500 | 18.33158900 | 21.52054400 |
| H  | 13.39763600 | 17.25528000 | 22.96419100 |
| H  | 13.30706000 | 15.85599000 | 21.54495700 |
| H  | 12.04888000 | 16.17012600 | 20.30874300 |
| H  | 9.86492300  | 16.58845300 | 23.32321600 |
| H  | 8.95828000  | 17.88492900 | 22.35882300 |

### **Ir(C<sub>4</sub>H<sub>8</sub>) H<sub>2</sub>@NU-1000**

Electronic Energy: -3585.4331284

Enthalpy: -3584.674415

Free Energy: -3584.825068

|   |             |             |             |
|---|-------------|-------------|-------------|
| C | 4.75049200  | 16.93539700 | 13.59151200 |
| C | 15.11751000 | 17.51771800 | 13.47071600 |
| C | 7.65140200  | 21.95140800 | 13.52461000 |
| C | 12.30938200 | 12.71057200 | 13.47592400 |
| C | 5.99449100  | 16.91130900 | 14.42098000 |
| C | 13.84214400 | 17.49265900 | 14.24865500 |
| C | 8.27865800  | 20.84295900 | 14.30837700 |
| C | 11.67338200 | 13.80117300 | 14.27536300 |
| H | 13.08219500 | 18.78643300 | 16.52814300 |
| H | 8.25368100  | 18.19934100 | 13.72746300 |
| H | 7.16766600  | 13.79845500 | 14.93894200 |
| H | 11.95055400 | 20.80540600 | 16.21036600 |
| H | 11.26553000 | 21.40958300 | 14.91871400 |
| H | 9.91176400  | 15.38807200 | 12.35921500 |
| H | 11.38628600 | 18.38905500 | 12.17623100 |
| H | 9.80196000  | 16.95380900 | 12.54755900 |
| O | 6.12962700  | 17.83252000 | 15.27594800 |
| O | 13.75254800 | 16.62823700 | 15.16626900 |
| O | 7.52347100  | 20.24418500 | 15.13146000 |
| O | 12.36454200 | 14.28020200 | 15.21887200 |
| O | 6.84909200  | 16.00913200 | 14.19041900 |
| O | 12.93612700 | 18.31137800 | 13.92992000 |
| O | 9.48991600  | 20.55689400 | 14.10659600 |
| O | 10.50696400 | 14.17477600 | 13.96847600 |
| O | 8.02563400  | 13.88918200 | 15.36735100 |
| O | 11.88446300 | 20.72178700 | 15.19901500 |

|    |             |             |             |
|----|-------------|-------------|-------------|
| O  | 9.29728800  | 16.07684100 | 12.64734700 |
| O  | 10.56265300 | 18.36593000 | 12.67493800 |
| O  | 8.72265100  | 17.91828500 | 14.51879200 |
| O  | 10.85424800 | 16.70801400 | 15.12980000 |
| O  | 12.20486600 | 18.39208200 | 16.51617500 |
| O  | 9.77294200  | 19.07941900 | 16.53520800 |
| Zr | 8.99943500  | 15.67826400 | 14.90146100 |
| Zr | 10.82799500 | 18.73365800 | 14.71945400 |
| C  | 15.11094400 | 17.57700100 | 19.68449000 |
| C  | 4.76733500  | 16.97128200 | 19.63405500 |
| C  | 12.35365200 | 12.73393900 | 19.69499500 |
| C  | 7.66552900  | 22.01626900 | 19.56356300 |
| C  | 13.84574900 | 17.57841200 | 18.88997100 |
| C  | 6.04720200  | 16.98792100 | 18.85824600 |
| C  | 11.73991000 | 13.85325800 | 18.91938500 |
| C  | 8.31062000  | 20.94262300 | 18.74285700 |
| H  | 10.22294700 | 13.85041000 | 16.66004000 |
| H  | 8.34139600  | 18.32943500 | 19.47178700 |
| H  | 7.05277600  | 14.17068800 | 18.25943900 |
| H  | 11.54101200 | 21.47606100 | 18.21505100 |
| H  | 9.03567300  | 15.37014200 | 21.07913300 |
| H  | 11.34749600 | 19.28258800 | 20.93811300 |
| O  | 13.76105500 | 16.70752100 | 17.97090000 |
| O  | 6.19767800  | 17.93512900 | 18.03537600 |
| O  | 12.43989800 | 14.35775500 | 17.99796400 |
| O  | 7.56812000  | 20.34300400 | 17.90907300 |
| O  | 12.97043700 | 18.43971600 | 19.15167700 |
| O  | 6.90399100  | 16.08577600 | 19.08429500 |
| O  | 10.57188700 | 14.22349600 | 19.23098000 |
| O  | 9.52274200  | 20.67855300 | 18.95108300 |
| O  | 11.93709200 | 20.69209500 | 17.81960700 |
| O  | 7.95422900  | 13.93969300 | 17.99498900 |
| O  | 10.71497200 | 18.70250700 | 20.49574500 |
| O  | 9.25605200  | 16.16716100 | 20.58340800 |
| O  | 10.92209900 | 16.81304500 | 18.06120700 |
| O  | 8.81924700  | 18.05347300 | 18.68036800 |
| O  | 8.31677100  | 16.55871300 | 16.65597300 |
| O  | 10.13248300 | 14.80805600 | 16.65324400 |
| Zr | 10.90032300 | 18.94059100 | 18.30775000 |
| Zr | 9.17196900  | 15.85142100 | 18.44133400 |
| Zr | 12.15908000 | 16.03971900 | 16.58693300 |
| Zr | 7.79102800  | 18.56887900 | 16.58851200 |
| H  | 8.39594400  | 22.55273200 | 12.99306200 |
| H  | 6.96632000  | 21.51648700 | 12.78407500 |
| H  | 7.04172300  | 22.58545200 | 14.17874800 |
| H  | 13.08624700 | 13.15087100 | 20.40008000 |
| H  | 11.60457600 | 12.17530100 | 20.26491000 |
| H  | 12.90794500 | 12.06260000 | 19.02919900 |
| H  | 15.96751700 | 17.70881900 | 19.01109700 |
| H  | 15.11967100 | 18.36400400 | 20.44484600 |
| H  | 15.24630500 | 16.59877900 | 20.16393600 |
| H  | 4.52351600  | 15.95121000 | 13.16847200 |
| H  | 3.89960900  | 17.31553600 | 14.16711200 |



|    |             |             |             |
|----|-------------|-------------|-------------|
| H  | 4.90808800  | 17.62932400 | 12.75376600 |
| H  | 12.58903100 | 11.88346800 | 14.14077200 |
| H  | 11.64941600 | 12.33519800 | 12.68755100 |
| H  | 13.24559600 | 13.07579400 | 13.03400000 |
| H  | 8.40481300  | 22.63918300 | 20.07724200 |
| H  | 7.00503600  | 22.63546100 | 18.94538500 |
| H  | 7.02741900  | 21.53970600 | 20.32112600 |
| H  | 15.97878700 | 17.42263500 | 14.14232800 |
| H  | 15.14596300 | 16.64368500 | 12.80532600 |
| H  | 15.20726100 | 18.42358800 | 12.86318500 |
| H  | 4.86385600  | 17.66996400 | 20.47745100 |
| H  | 3.93269800  | 17.32563500 | 19.01937800 |
| H  | 4.55029800  | 15.97995100 | 20.04588000 |
| H  | 7.91977200  | 13.82511700 | 16.98678200 |
| Ir | 9.41814000  | 17.86129800 | 21.91242200 |
| C  | 10.33836100 | 19.01466800 | 23.40968000 |
| H  | 8.71053300  | 19.21379800 | 22.17629000 |
| C  | 9.30261200  | 16.44567600 | 23.44856100 |
| C  | 10.84537000 | 18.04173100 | 24.46066400 |
| H  | 11.15617700 | 19.59715600 | 22.94687900 |
| H  | 9.67806400  | 19.75601500 | 23.88814900 |
| C  | 9.73041500  | 17.05981900 | 24.76156400 |
| H  | 8.38570000  | 15.84132800 | 23.52852000 |
| H  | 10.10200000 | 15.78052400 | 23.06105500 |
| H  | 11.72180300 | 17.48634100 | 24.08115500 |
| H  | 11.18898600 | 18.57303900 | 25.36534600 |
| H  | 8.87989800  | 17.59090300 | 25.22358000 |
| H  | 10.03575900 | 16.28269500 | 25.48363100 |
| H  | 8.01707800  | 17.68199800 | 22.58458200 |

### TS2@NU-1000

Electronic Energy: -3585.4218118

Enthalpy: -3584.663744

Free Energy: -3584.812201

|   |             |             |             |
|---|-------------|-------------|-------------|
| C | 4.75049900  | 16.93540100 | 13.59150200 |
| C | 15.11750500 | 17.51770700 | 13.47070800 |
| C | 7.65139700  | 21.95139900 | 13.52460100 |
| C | 12.30939100 | 12.71058900 | 13.47590900 |
| C | 5.99458200  | 16.91131500 | 14.42099500 |
| C | 13.84205700 | 17.49262500 | 14.24868900 |
| C | 8.27870000  | 20.84290400 | 14.30839400 |
| C | 11.67340600 | 13.80127400 | 14.27539000 |
| H | 13.07889900 | 18.78722000 | 16.52456100 |
| H | 8.26427800  | 18.19773900 | 13.71098800 |
| H | 7.16581600  | 13.79371100 | 14.93031200 |
| H | 11.95778700 | 20.81699300 | 16.20468300 |
| H | 11.27723100 | 21.41629200 | 14.90532200 |
| H | 9.91634600  | 15.38858800 | 12.36627400 |
| H | 11.38596300 | 18.39946400 | 12.18366100 |
| H | 9.80813300  | 16.95474500 | 12.55445900 |

|    |             |             |             |
|----|-------------|-------------|-------------|
| O  | 6.12763400  | 17.83406000 | 15.27452100 |
| O  | 13.74707300 | 16.63067200 | 15.16854800 |
| O  | 7.51644800  | 20.24170700 | 15.12414200 |
| O  | 12.35839500 | 14.28333600 | 15.22162600 |
| O  | 6.85044600  | 16.01160100 | 14.18998700 |
| O  | 12.93724300 | 18.31478700 | 13.93233200 |
| O  | 9.48904700  | 20.55761000 | 14.11216500 |
| O  | 10.50334400 | 14.17001000 | 13.97129700 |
| O  | 8.02024700  | 13.88895300 | 15.36462300 |
| O  | 11.88773000 | 20.72383500 | 15.19152900 |
| O  | 9.30178600  | 16.07854800 | 12.65178100 |
| O  | 10.56284900 | 18.37245800 | 12.68312300 |
| O  | 8.72114500  | 17.92082800 | 14.51092200 |
| O  | 10.84912700 | 16.70911300 | 15.12635600 |
| O  | 12.20006100 | 18.39564000 | 16.52635500 |
| O  | 9.76304800  | 19.08294500 | 16.53929300 |
| Zr | 8.99628900  | 15.67688000 | 14.90410500 |
| Zr | 10.83039700 | 18.73899400 | 14.72795700 |
| C  | 15.11098300 | 17.57701000 | 19.68442800 |
| C  | 4.76731400  | 16.97131000 | 19.63402200 |
| C  | 12.35368000 | 12.73390300 | 19.69492000 |
| C  | 7.66550700  | 22.01628700 | 19.56352200 |
| C  | 13.84592900 | 17.57877200 | 18.88996800 |
| C  | 6.04699800  | 16.98756800 | 18.85832400 |
| C  | 11.73966100 | 13.85285000 | 18.91946200 |
| C  | 8.31079100  | 20.94298800 | 18.74286500 |
| H  | 10.21960600 | 13.85226100 | 16.65968000 |
| H  | 7.95901100  | 18.47403000 | 19.11026300 |
| H  | 7.06060000  | 14.10182600 | 18.28318000 |
| H  | 11.66250400 | 21.48893000 | 18.24554700 |
| H  | 9.94329000  | 15.60512000 | 21.05080300 |
| H  | 11.57775900 | 18.45430000 | 20.88580200 |
| O  | 13.75245100 | 16.70818900 | 17.97341700 |
| O  | 6.21388300  | 17.95337400 | 18.05501400 |
| O  | 12.42971900 | 14.35410900 | 17.99095300 |
| O  | 7.56280000  | 20.32964600 | 17.91966800 |
| O  | 12.97076100 | 18.43433900 | 19.16653000 |
| O  | 6.89803000  | 16.07689400 | 19.06969400 |
| O  | 10.58290600 | 14.24209500 | 19.25472100 |
| O  | 9.52849900  | 20.69670100 | 18.93018600 |
| O  | 11.96595800 | 20.69565200 | 17.79160200 |
| O  | 7.96299900  | 13.91762600 | 17.98815500 |
| O  | 10.76174500 | 18.71052900 | 20.44559200 |
| O  | 9.32533700  | 16.15588500 | 20.56017400 |
| O  | 10.87720900 | 16.83735100 | 18.05010000 |
| O  | 8.76919100  | 18.07476400 | 18.75950800 |
| O  | 8.30744200  | 16.56428900 | 16.65461400 |
| O  | 10.12188500 | 14.80944100 | 16.66455400 |
| Zr | 10.91169400 | 18.97424800 | 18.33677700 |
| Zr | 9.14767900  | 15.83521000 | 18.45257700 |
| Zr | 12.13832400 | 16.05302300 | 16.59297700 |
| Zr | 7.80042100  | 18.57068100 | 16.54940900 |
| H  | 8.39647100  | 22.55964700 | 13.00178700 |

|    |             |             |             |
|----|-------------|-------------|-------------|
| H  | 6.97598000  | 21.51472400 | 12.77626900 |
| H  | 7.03180100  | 22.57851300 | 14.17597100 |
| H  | 13.06319800 | 13.15518200 | 20.42093300 |
| H  | 11.60106100 | 12.15945300 | 20.24421200 |
| H  | 12.93297400 | 12.07759100 | 19.03584200 |
| H  | 15.96926600 | 17.70013800 | 19.01156100 |
| H  | 15.12284100 | 18.36922600 | 20.43919900 |
| H  | 15.24280400 | 16.60096900 | 20.16963300 |
| H  | 4.52905700  | 15.95426900 | 13.15872600 |
| H  | 3.89742500  | 17.30511900 | 14.17066800 |
| H  | 4.90434300  | 17.63926200 | 12.76141200 |
| H  | 11.67677200 | 12.38377500 | 12.64473100 |
| H  | 13.28401100 | 13.04473100 | 13.09814500 |
| H  | 12.51308100 | 11.85278200 | 14.12997000 |
| H  | 8.34642800  | 22.41274000 | 20.32360100 |
| H  | 7.33749500  | 22.83585900 | 18.90978800 |
| H  | 6.75755700  | 21.62345000 | 20.03809100 |
| H  | 15.97853200 | 17.42243200 | 14.14261000 |
| H  | 15.14663300 | 16.64432700 | 12.80450500 |
| H  | 15.20673800 | 18.42434200 | 12.86437500 |
| H  | 4.94857200  | 17.46358600 | 20.60065900 |
| H  | 3.97821700  | 17.52387300 | 19.11465000 |
| H  | 4.44450700  | 15.94796600 | 19.85632300 |
| H  | 7.91083300  | 13.81547700 | 16.97936800 |
| Ir | 8.80788200  | 18.07860000 | 21.28581300 |
| C  | 9.33362100  | 17.72762300 | 23.23844400 |
| H  | 8.90199100  | 19.62696900 | 21.48131400 |
| C  | 8.68386600  | 18.72538600 | 24.18225400 |
| H  | 9.01675200  | 16.69560700 | 23.47617900 |
| H  | 10.43740500 | 17.75791500 | 23.29787500 |
| H  | 8.68009100  | 18.36202900 | 25.22435700 |
| H  | 9.26312400  | 19.66560900 | 24.18806300 |
| C  | 7.28588300  | 19.01263200 | 23.67230400 |
| C  | 7.40030400  | 19.47114300 | 22.22773200 |
| H  | 6.76960800  | 19.77123300 | 24.28565900 |
| H  | 6.68217000  | 18.09068800 | 23.72821100 |
| H  | 7.64193000  | 20.54872400 | 22.22048500 |
| H  | 6.46279500  | 19.38695200 | 21.65749700 |
| H  | 7.43660900  | 17.38506400 | 21.63900500 |

### Ir(butane) H@NU-1000

Electronic Energy: -3585.4551443

Enthalpy: -3584.692787

Free Energy: -3584.843815

|   |           |           |           |
|---|-----------|-----------|-----------|
| C | 4.750519  | 16.935392 | 13.591472 |
| C | 15.117502 | 17.517693 | 13.470703 |
| C | 7.651377  | 21.951377 | 13.524586 |
| C | 12.309406 | 12.710588 | 13.475922 |
| C | 5.994778  | 16.911268 | 14.421085 |
| C | 13.841976 | 17.492628 | 14.248713 |

|    |           |           |           |
|----|-----------|-----------|-----------|
| C  | 8.278713  | 20.842908 | 14.308328 |
| C  | 11.673207 | 13.801366 | 14.275433 |
| H  | 13.069825 | 18.807684 | 16.518032 |
| H  | 8.239497  | 18.172370 | 13.726451 |
| H  | 7.109821  | 13.928582 | 14.150655 |
| H  | 11.937345 | 20.804888 | 16.190273 |
| H  | 11.251270 | 21.399262 | 14.893897 |
| H  | 9.835352  | 15.376143 | 12.255594 |
| H  | 11.395217 | 18.396908 | 12.153572 |
| H  | 9.800337  | 16.944594 | 12.479265 |
| O  | 6.132652  | 17.823505 | 15.284876 |
| O  | 13.745236 | 16.628116 | 15.165007 |
| O  | 7.530377  | 20.228429 | 15.126058 |
| O  | 12.320324 | 14.258559 | 15.261157 |
| O  | 6.857058  | 16.033278 | 14.155652 |
| O  | 12.937401 | 18.313029 | 13.926311 |
| O  | 9.490004  | 20.552988 | 14.095445 |
| O  | 10.536936 | 14.208711 | 13.913433 |
| O  | 7.969888  | 13.774451 | 14.561217 |
| O  | 11.873100 | 20.715913 | 15.180041 |
| O  | 9.265453  | 16.089285 | 12.573849 |
| O  | 10.573036 | 18.360239 | 12.653936 |
| O  | 8.728456  | 17.893073 | 14.506707 |
| O  | 10.859923 | 16.692849 | 15.115128 |
| O  | 12.199152 | 18.398473 | 16.506965 |
| O  | 9.763439  | 19.049982 | 16.511623 |
| Zr | 9.009477  | 15.674659 | 14.830804 |
| Zr | 10.828297 | 18.726365 | 14.691992 |
| C  | 15.111003 | 17.576990 | 19.684394 |
| C  | 4.767326  | 16.971293 | 19.634043 |
| C  | 12.353679 | 12.733877 | 19.694883 |
| C  | 7.665481  | 22.016291 | 19.563497 |
| C  | 13.845988 | 17.578955 | 18.890025 |
| C  | 6.047137  | 16.987238 | 18.858214 |
| C  | 11.739379 | 13.852803 | 18.919447 |
| C  | 8.310929  | 20.943235 | 18.742956 |
| H  | 10.479942 | 13.812526 | 16.623413 |
| H  | 8.307262  | 18.325436 | 19.426789 |
| H  | 7.182350  | 14.050203 | 19.149872 |
| H  | 11.572822 | 21.452652 | 18.233234 |
| H  | 10.185211 | 17.648541 | 20.652852 |
| H  | 9.680009  | 15.577601 | 21.098390 |
| H  | 11.595046 | 18.350937 | 20.814697 |
| O  | 13.774663 | 16.731951 | 17.950854 |
| O  | 6.185759  | 17.910665 | 17.998909 |
| O  | 12.390415 | 14.316918 | 17.935866 |
| O  | 7.579243  | 20.347998 | 17.896116 |
| O  | 12.936612 | 18.397784 | 19.191351 |
| O  | 6.920927  | 16.135012 | 19.143462 |
| O  | 10.626319 | 14.280774 | 19.310828 |
| O  | 9.517312  | 20.648253 | 18.972874 |
| O  | 11.924732 | 20.668808 | 17.797552 |
| O  | 8.027616  | 13.880318 | 18.715177 |

|    |           |           |           |
|----|-----------|-----------|-----------|
| O  | 10.691492 | 18.522377 | 20.516912 |
| O  | 9.348652  | 16.305658 | 20.561717 |
| O  | 10.910746 | 16.793182 | 18.030898 |
| O  | 8.798249  | 18.044257 | 18.648497 |
| O  | 8.279445  | 16.456704 | 16.647763 |
| O  | 10.000918 | 14.649946 | 16.645438 |
| Zr | 10.869662 | 18.926472 | 18.261154 |
| Zr | 9.117279  | 15.792606 | 18.550111 |
| Zr | 12.146838 | 16.058602 | 16.593551 |
| Zr | 7.777125  | 18.523412 | 16.590255 |
| H  | 8.400677  | 22.637858 | 13.116582 |
| H  | 7.105886  | 21.512205 | 12.677717 |
| H  | 6.918398  | 22.493598 | 14.131663 |
| H  | 12.708677 | 13.123358 | 20.659069 |
| H  | 11.601115 | 11.969489 | 19.924138 |
| H  | 13.203561 | 12.288873 | 19.167973 |
| H  | 15.967105 | 17.722194 | 19.013600 |
| H  | 15.116601 | 18.352772 | 20.456358 |
| H  | 15.251320 | 16.592056 | 20.148457 |
| H  | 4.465905  | 15.929444 | 13.264761 |
| H  | 3.922926  | 17.416904 | 14.122305 |
| H  | 4.955019  | 17.525760 | 12.687174 |
| H  | 13.173471 | 12.282177 | 13.992855 |
| H  | 11.576275 | 11.929147 | 13.240549 |
| H  | 12.650587 | 13.121646 | 12.515450 |
| H  | 8.403929  | 22.708318 | 19.981571 |
| H  | 6.911758  | 22.557789 | 18.981841 |
| H  | 7.142754  | 21.537976 | 20.403580 |
| H  | 15.973489 | 17.294845 | 14.117249 |
| H  | 15.082129 | 16.725591 | 12.709540 |
| H  | 15.260287 | 18.474878 | 12.959117 |
| H  | 4.897262  | 17.598716 | 20.527068 |
| H  | 3.941605  | 17.393337 | 19.051824 |
| H  | 4.519815  | 15.961299 | 19.977735 |
| Ir | 7.783272  | 13.890457 | 16.650608 |
| H  | 6.238628  | 13.589924 | 16.638554 |
| C  | 8.112955  | 11.878496 | 16.643654 |
| C  | 9.590616  | 11.547460 | 16.623136 |
| H  | 7.607929  | 11.451052 | 15.761990 |
| H  | 7.635873  | 11.468739 | 17.549731 |
| C  | 9.892481  | 10.052995 | 16.620718 |
| H  | 10.058279 | 11.998002 | 15.725513 |
| H  | 10.085175 | 12.000564 | 17.505044 |
| C  | 11.374746 | 9.741999  | 16.598630 |
| H  | 9.421903  | 9.589856  | 17.505024 |
| H  | 9.395179  | 9.587892  | 15.752237 |
| H  | 11.572953 | 8.661085  | 16.596485 |
| H  | 11.863361 | 10.164430 | 15.707499 |
| H  | 11.890020 | 10.165817 | 17.473869 |

TS3@NU-1000

Electronic Energy: -3585.4474166

Enthalpy: -3584.689874

Free Energy: -3584.840871

|    |             |             |             |
|----|-------------|-------------|-------------|
| C  | 4.75048500  | 16.93541400 | 13.59152300 |
| C  | 15.11751200 | 17.51775700 | 13.47072100 |
| C  | 7.65142700  | 21.95149200 | 13.52470800 |
| C  | 12.30937500 | 12.71061100 | 13.47586600 |
| C  | 5.99466000  | 16.91122100 | 14.42101100 |
| C  | 13.84189400 | 17.49238400 | 14.24873800 |
| C  | 8.27868200  | 20.84268600 | 14.30829000 |
| C  | 11.67348600 | 13.80135200 | 14.27549800 |
| H  | 13.07606900 | 18.78559000 | 16.53297800 |
| H  | 8.25469200  | 18.20112300 | 13.73027600 |
| H  | 7.16987500  | 13.79772300 | 14.92863500 |
| H  | 11.94676100 | 20.80931000 | 16.22410600 |
| H  | 11.26958500 | 21.41245600 | 14.92425300 |
| H  | 9.91695100  | 15.39895700 | 12.35092600 |
| H  | 11.38999000 | 18.39572100 | 12.18989300 |
| H  | 9.80840800  | 16.96475100 | 12.55058300 |
| O  | 6.12987300  | 17.83003800 | 15.27771300 |
| O  | 13.75140200 | 16.62554200 | 15.16478500 |
| O  | 7.52109100  | 20.24272200 | 15.12884700 |
| O  | 12.36277200 | 14.27891800 | 15.22082200 |
| O  | 6.85027100  | 16.01020700 | 14.18676200 |
| O  | 12.93758600 | 18.31520200 | 13.93725600 |
| O  | 9.49057000  | 20.55848500 | 14.11114500 |
| O  | 10.50900000 | 14.17826400 | 13.96410900 |
| O  | 8.02798100  | 13.88773100 | 15.35698600 |
| O  | 11.88283800 | 20.72188600 | 15.20944200 |
| O  | 9.30282300  | 16.08581800 | 12.64405300 |
| O  | 10.56475300 | 18.37027600 | 12.68582400 |
| O  | 8.72221100  | 17.91794400 | 14.52171200 |
| O  | 10.85234700 | 16.70747900 | 15.13350500 |
| O  | 12.19967600 | 18.38887500 | 16.52920900 |
| O  | 9.76637300  | 19.07415200 | 16.54270000 |
| Zr | 9.00090500  | 15.67770400 | 14.89246400 |
| Zr | 10.82684600 | 18.73878100 | 14.73337000 |
| C  | 15.11098600 | 17.57679500 | 19.68442100 |
| C  | 4.76735400  | 16.97131900 | 19.63408900 |
| C  | 12.35373500 | 12.73385000 | 19.69480000 |
| C  | 7.66593900  | 22.01501000 | 19.56485100 |
| C  | 13.84602700 | 17.57935800 | 18.89005600 |
| C  | 6.04658800  | 16.98718300 | 18.85817500 |
| C  | 11.73948000 | 13.85272500 | 18.91972900 |
| C  | 8.31077100  | 20.94474300 | 18.74122300 |
| H  | 10.22163300 | 13.84799500 | 16.66238500 |
| H  | 8.34460700  | 18.31551800 | 19.48335100 |
| H  | 7.04548000  | 14.18055800 | 18.23846800 |
| H  | 11.61479400 | 21.48284300 | 18.24817800 |
| H  | 8.61031900  | 15.41634200 | 21.05649700 |
| H  | 11.64616100 | 18.55701200 | 20.77485900 |

|    |             |             |             |
|----|-------------|-------------|-------------|
| O  | 13.76478800 | 16.72027600 | 17.96323200 |
| O  | 6.19744900  | 17.92949400 | 18.03228800 |
| O  | 12.44387100 | 14.36285800 | 18.00282100 |
| O  | 7.56726900  | 20.35303200 | 17.90226900 |
| O  | 12.96555400 | 18.42830200 | 19.17373500 |
| O  | 6.90489500  | 16.08524500 | 19.09148500 |
| O  | 10.56884000 | 14.22215800 | 19.22196200 |
| O  | 9.52017700  | 20.67818200 | 18.95198300 |
| O  | 11.94659300 | 20.69100600 | 17.81249700 |
| O  | 7.94742700  | 13.94095400 | 17.98359000 |
| O  | 10.74359600 | 18.68183800 | 20.45808000 |
| O  | 9.15982900  | 16.09255500 | 20.64159900 |
| O  | 10.91917000 | 16.80426800 | 18.07127400 |
| O  | 8.80790100  | 18.05082100 | 18.68042000 |
| O  | 8.31438800  | 16.55027400 | 16.65460700 |
| O  | 10.13159200 | 14.80561300 | 16.64815400 |
| Zr | 10.89976800 | 18.95285100 | 18.33887200 |
| Zr | 9.17400500  | 15.85225900 | 18.42129000 |
| Zr | 12.15692200 | 16.04157400 | 16.58696100 |
| Zr | 7.79418500  | 18.57270200 | 16.58836600 |
| H  | 8.39448000  | 22.54417400 | 12.98153800 |
| H  | 6.95281100  | 21.51864900 | 12.79581600 |
| H  | 7.05538700  | 22.59416900 | 14.18313700 |
| H  | 11.60463300 | 12.17393100 | 20.26327300 |
| H  | 12.91046700 | 12.06490600 | 19.02869700 |
| H  | 13.08343800 | 13.15181700 | 20.40209500 |
| H  | 15.96951500 | 17.69434600 | 19.01107700 |
| H  | 15.12621100 | 18.37035000 | 20.43790600 |
| H  | 15.23820600 | 16.60188400 | 20.17320500 |
| H  | 4.51966900  | 15.94959600 | 13.17430400 |
| H  | 3.90101300  | 17.32246900 | 14.16452200 |
| H  | 4.91142300  | 17.62298200 | 12.74916700 |
| H  | 12.60519500 | 11.89024100 | 14.14190500 |
| H  | 11.64382400 | 12.32555300 | 12.69693900 |
| H  | 13.23657000 | 13.08226000 | 13.02025200 |
| H  | 8.37780600  | 22.49795300 | 20.24213400 |
| H  | 7.20452300  | 22.76862400 | 18.91335100 |
| H  | 6.84548200  | 21.57650100 | 20.14884100 |
| H  | 15.97824600 | 17.44667300 | 14.14619100 |
| H  | 15.15940700 | 16.63097500 | 12.82331100 |
| H  | 15.19788400 | 18.41358400 | 12.84729300 |
| H  | 4.91377100  | 17.55728700 | 20.55330000 |
| H  | 3.95574300  | 17.44132100 | 19.06937800 |
| H  | 4.48969800  | 15.95648000 | 19.93980600 |
| H  | 7.91873800  | 13.82286700 | 16.97548600 |
| Ir | 9.36966700  | 17.64729400 | 21.90751500 |
| C  | 9.41183400  | 19.43873600 | 23.16799900 |
| C  | 8.41292500  | 19.43905400 | 22.12357700 |
| H  | 7.35656200  | 19.38033900 | 22.41820500 |
| H  | 8.60636000  | 20.07781900 | 21.25348500 |
| H  | 8.40438900  | 16.92334400 | 22.94119200 |
| H  | 10.23701100 | 18.28078500 | 23.11450500 |
| C  | 8.98990800  | 19.39371500 | 24.62130200 |

|   |             |             |             |
|---|-------------|-------------|-------------|
| C | 10.06096800 | 18.89597400 | 25.56838000 |
| H | 8.08558900  | 18.77096100 | 24.70735900 |
| H | 8.68057900  | 20.41500900 | 24.90359300 |
| H | 9.72912600  | 18.92785700 | 26.61437700 |
| H | 10.33536400 | 17.85354100 | 25.34516900 |
| H | 10.97854800 | 19.49951700 | 25.49833400 |
| H | 10.26908000 | 20.10535600 | 22.98068100 |

**Ir(1-butene) H<sub>2</sub>@NU-1000**

Electronic Energy: -3585.4697721

Enthalpy: -3584.711930

Free Energy: -3584.863121

|    |             |             |             |
|----|-------------|-------------|-------------|
| C  | 4.75050100  | 16.93540900 | 13.59149900 |
| C  | 15.11750200 | 17.51769700 | 13.47070300 |
| C  | 7.65139400  | 21.95139100 | 13.52459200 |
| C  | 12.30939100 | 12.71058900 | 13.47590800 |
| C  | 5.99466300  | 16.91129700 | 14.42100600 |
| C  | 13.84201600 | 17.49260800 | 14.24870200 |
| C  | 8.27876200  | 20.84286500 | 14.30841200 |
| C  | 11.67336400 | 13.80128800 | 14.27541000 |
| H  | 13.08100000 | 18.78868900 | 16.52400700 |
| H  | 8.25428200  | 18.19832500 | 13.72194700 |
| H  | 7.16329000  | 13.79991500 | 14.93520700 |
| H  | 11.95130300 | 20.80565300 | 16.20507000 |
| H  | 11.26838800 | 21.40886700 | 14.91083000 |
| H  | 9.91288800  | 15.38535900 | 12.36162400 |
| H  | 11.38396400 | 18.38876100 | 12.17318600 |
| H  | 9.80153900  | 16.95126200 | 12.54722700 |
| O  | 6.13060500  | 17.83445400 | 15.27311600 |
| O  | 13.75253200 | 16.63072400 | 15.16875000 |
| O  | 7.52202300  | 20.24325700 | 15.12908000 |
| O  | 12.36339900 | 14.28213800 | 15.21836300 |
| O  | 6.84845600  | 16.00834000 | 14.19050300 |
| O  | 12.93507700 | 18.30927900 | 13.92706400 |
| O  | 9.48944000  | 20.55648600 | 14.10575100 |
| O  | 10.50442400 | 14.17065200 | 13.97156500 |
| O  | 8.01984500  | 13.88940200 | 15.36666900 |
| O  | 11.88578600 | 20.72038600 | 15.19258000 |
| O  | 9.29722900  | 16.07413500 | 12.64727700 |
| O  | 10.56058600 | 18.36557700 | 12.67233800 |
| O  | 8.72164800  | 17.91829000 | 14.51459900 |
| O  | 10.85254300 | 16.70570600 | 15.12362100 |
| O  | 12.20475100 | 18.39181200 | 16.51414800 |
| O  | 9.77291800  | 19.07952500 | 16.53020600 |
| Zr | 8.99650900  | 15.67799700 | 14.90159600 |
| Zr | 10.82792100 | 18.73385100 | 14.71682500 |
| C  | 15.11103600 | 17.57704100 | 19.68434200 |
| C  | 4.76730300  | 16.97133500 | 19.63400600 |
| C  | 12.35368500 | 12.73386400 | 19.69486000 |
| C  | 7.66547500  | 22.01627400 | 19.56351500 |



|    |             |             |             |
|----|-------------|-------------|-------------|
| C  | 13.84611100 | 17.57916500 | 18.89001700 |
| C  | 6.04687100  | 16.98735900 | 18.85830100 |
| C  | 11.73942500 | 13.85253600 | 18.91949900 |
| C  | 8.31090100  | 20.94318000 | 18.74292900 |
| H  | 10.21417800 | 13.84736300 | 16.65477000 |
| H  | 8.29727700  | 18.39047100 | 19.43910300 |
| H  | 7.06049100  | 14.12034400 | 18.28208400 |
| H  | 11.56366000 | 21.47549300 | 18.21618300 |
| H  | 9.84275800  | 15.43755300 | 20.94763000 |
| H  | 11.52479600 | 19.07508600 | 20.92541600 |
| O  | 13.75135000 | 16.69801800 | 17.98196600 |
| O  | 6.19464000  | 17.92365900 | 18.02411200 |
| O  | 12.42602500 | 14.34157000 | 17.98363400 |
| O  | 7.57088400  | 20.34759800 | 17.90220400 |
| O  | 12.98030100 | 18.45189000 | 19.14283200 |
| O  | 6.90222100  | 16.08420900 | 19.09077000 |
| O  | 10.58486600 | 14.24693500 | 19.25980800 |
| O  | 9.52601400  | 20.68720000 | 18.94110400 |
| O  | 11.94331200 | 20.69053900 | 17.80692600 |
| O  | 7.96218200  | 13.92627400 | 17.99186600 |
| O  | 10.77031800 | 18.67736200 | 20.47761300 |
| O  | 9.30171600  | 16.13793500 | 20.56260900 |
| O  | 10.90975300 | 16.81742600 | 18.04517700 |
| O  | 8.80755100  | 18.06246600 | 18.68664900 |
| O  | 8.31307600  | 16.56128500 | 16.65330100 |
| O  | 10.12465700 | 14.80521000 | 16.65889700 |
| Zr | 10.90266900 | 18.94383600 | 18.30878200 |
| Zr | 9.15668100  | 15.84635700 | 18.44120600 |
| Zr | 12.15108000 | 16.04353800 | 16.58497800 |
| Zr | 7.79497800  | 18.57172400 | 16.57996300 |
| H  | 8.39785100  | 22.56830800 | 13.01388200 |
| H  | 6.98976400  | 21.51394400 | 12.76434900 |
| H  | 7.01870100  | 22.56947000 | 14.17186600 |
| H  | 13.06922400 | 13.15463800 | 20.41527100 |
| H  | 11.60306100 | 12.16270100 | 20.25051900 |
| H  | 12.92632000 | 12.07376900 | 19.03383300 |
| H  | 15.96838300 | 17.69594200 | 19.00947600 |
| H  | 15.12618100 | 18.37229000 | 20.43594600 |
| H  | 15.24082000 | 16.60322700 | 20.17424300 |
| H  | 4.51855500  | 15.94938400 | 13.17538000 |
| H  | 3.90154600  | 17.32416200 | 14.16412600 |
| H  | 4.91209300  | 17.62196800 | 12.74845900 |
| H  | 12.55892700 | 11.87103000 | 14.13737900 |
| H  | 11.65984900 | 12.35415700 | 12.67030500 |
| H  | 13.26157300 | 13.06365700 | 13.05937300 |
| H  | 8.18805400  | 22.15816300 | 20.51607500 |
| H  | 7.71413000  | 22.96780100 | 19.01440300 |
| H  | 6.60530200  | 21.79735600 | 19.72969900 |
| H  | 15.97888800 | 17.41376500 | 14.14077900 |
| H  | 15.14118800 | 16.64885300 | 12.79830300 |
| H  | 15.21047200 | 18.42746600 | 12.86949000 |
| H  | 4.21106900  | 17.90537100 | 19.50927300 |
| H  | 4.13554800  | 16.14564000 | 19.27599800 |

|    |            |             |             |
|----|------------|-------------|-------------|
| H  | 4.95331100 | 16.77528300 | 20.69767700 |
| Ir | 9.33026600 | 17.90805600 | 21.78315600 |
| H  | 9.89165400 | 18.75516900 | 22.97470100 |
| H  | 8.91087100 | 19.35606700 | 22.22736000 |
| H  | 7.91211000 | 13.82166300 | 16.98286100 |
| C  | 8.34482600 | 16.77543000 | 23.24646900 |
| H  | 8.48375900 | 17.11615100 | 24.27849500 |
| H  | 8.56639700 | 15.71219100 | 23.09484000 |
| C  | 7.38639100 | 17.41431300 | 22.42099900 |
| H  | 6.99961600 | 16.81685100 | 21.57954900 |
| C  | 6.45343700 | 18.49717700 | 22.88617500 |
| C  | 6.15627400 | 19.56322300 | 21.84741300 |
| H  | 6.85401400 | 18.96322900 | 23.80242300 |
| H  | 5.50929600 | 18.01158400 | 23.19674700 |
| H  | 5.32443200 | 20.21460700 | 22.14996800 |
| H  | 7.02955800 | 20.20847100 | 21.67814800 |
| H  | 5.89297000 | 19.13047600 | 20.86886100 |

**Table S5.** XYZ Cartesian Coordinates of All Optimized Structures on the UiO-66 Site-1 Support (All Energies Are in Hartree).

**UiO-66**

Electronic Energy: -3551.824925

Enthalpy: -3551.186974

Free Energy: -3551.313139

|    |             |             |             |
|----|-------------|-------------|-------------|
| O  | 13.74973200 | 11.56229600 | 23.34789400 |
| Zr | 13.69132500 | 13.51249200 | 24.56972500 |
| C  | 10.48247900 | 13.51746100 | 23.85898200 |
| C  | 9.43055900  | 13.62944900 | 22.79494800 |
| O  | 10.09571800 | 13.47231800 | 25.05536000 |
| O  | 11.69097900 | 13.47106800 | 23.47419500 |
| O  | 15.71465300 | 13.45927200 | 23.54333200 |
| O  | 13.60109600 | 15.43967800 | 23.47551300 |
| Zr | 13.71944200 | 10.93887800 | 27.06605300 |
| Zr | 11.12938000 | 13.40821600 | 27.03442300 |
| O  | 15.04323000 | 14.94880200 | 25.66720100 |
| O  | 12.30639600 | 12.00719200 | 25.61689900 |
| O  | 12.58025400 | 14.50483200 | 25.99243100 |
| O  | 14.73483900 | 12.47411500 | 26.01888400 |
| C  | 13.49592700 | 16.64233700 | 23.85446400 |
| C  | 13.29574100 | 17.68428400 | 22.79451300 |
| O  | 13.51595600 | 17.03363200 | 25.05376600 |
| C  | 16.90947300 | 13.43502200 | 23.95455100 |
| O  | 17.26170600 | 13.52707400 | 25.16591300 |
| Zr | 13.56213400 | 16.00835500 | 27.05825000 |
| Zr | 16.15057600 | 13.56337000 | 27.10557500 |
| H  | 11.76407200 | 11.40697500 | 25.09835300 |
| H  | 15.59563300 | 15.51588100 | 25.12344000 |
| H  | 11.57835100 | 15.40864200 | 28.99143900 |
| O  | 12.16011900 | 14.87085400 | 28.44858300 |
| O  | 15.49742400 | 17.12022800 | 27.13852600 |
| O  | 11.55983400 | 16.99260800 | 26.94579500 |
| O  | 13.55420800 | 17.06668700 | 29.02431700 |
| Zr | 13.59213800 | 13.48900000 | 29.56795900 |
| O  | 14.62881900 | 14.57024900 | 28.11527400 |
| H  | 15.64367300 | 11.59597500 | 29.06392600 |
| O  | 15.07577000 | 12.11888400 | 28.49247200 |
| O  | 11.72564700 | 9.89542600  | 27.21554100 |
| O  | 15.76667300 | 9.97855900  | 27.01584600 |
| O  | 13.69903200 | 9.91083500  | 29.05023100 |
| O  | 12.60599300 | 12.42692400 | 28.08735800 |
| O  | 17.15636000 | 13.67020400 | 29.11020500 |
| O  | 17.13113300 | 15.57912800 | 27.18230000 |
| O  | 17.28009300 | 11.63703800 | 27.07614000 |
| O  | 10.04401300 | 13.33134600 | 28.98906200 |

|   |             |             |             |
|---|-------------|-------------|-------------|
| O | 10.10770300 | 11.43759200 | 27.03101400 |
| O | 10.01477300 | 15.36320700 | 26.95823400 |
| C | 10.36825400 | 16.57166100 | 26.87875800 |
| C | 9.29455800  | 17.59624600 | 26.66134400 |
| C | 13.61091100 | 16.68242900 | 30.22799500 |
| C | 13.76036900 | 17.74268300 | 31.27886000 |
| O | 13.58123100 | 15.48123500 | 30.61465900 |
| C | 16.94889000 | 10.42182000 | 26.99120900 |
| C | 18.05510100 | 9.41984000  | 26.83160200 |
| C | 13.57768500 | 10.30254300 | 30.24581800 |
| C | 13.40033200 | 9.24675300  | 31.29605400 |
| O | 13.57185100 | 11.50822400 | 30.62300700 |
| C | 16.70763100 | 16.76789400 | 27.23208400 |
| C | 10.52143200 | 10.24471200 | 27.15824800 |
| C | 9.48179700  | 9.17022800  | 27.28463300 |
| C | 16.74533900 | 13.71904700 | 30.30458500 |
| C | 17.77035700 | 13.95239300 | 31.37471400 |
| O | 15.54010200 | 13.60774500 | 30.66629800 |
| C | 10.41572100 | 13.28582000 | 30.19569400 |
| C | 9.35677700  | 13.06176900 | 31.23409300 |
| O | 11.60922000 | 13.38826000 | 30.59754200 |
| H | 9.57439600  | 18.56245200 | 27.09438300 |
| H | 9.17396300  | 17.74566100 | 25.57907700 |
| H | 8.33172400  | 17.25541100 | 27.05614600 |
| H | 9.23006600  | 9.05451600  | 28.34827800 |
| H | 8.55972100  | 9.44270100  | 26.75995700 |
| H | 9.86275700  | 8.20734700  | 26.92861200 |
| H | 18.96412900 | 9.75088100  | 27.34538300 |
| H | 17.75120800 | 8.42786300  | 27.18167800 |
| H | 18.30096200 | 9.33896700  | 25.76315800 |
| C | 17.72325600 | 17.85015900 | 27.45000700 |
| H | 17.38915400 | 18.80257300 | 27.02515000 |
| H | 17.84286500 | 17.99659100 | 28.53278900 |
| H | 18.70128800 | 17.56460800 | 27.04859400 |
| H | 13.72475000 | 9.60120300  | 32.27991100 |
| H | 12.33000600 | 9.00615800  | 31.36439500 |
| H | 13.92239200 | 8.32389600  | 31.02153100 |
| H | 14.83321700 | 17.92581800 | 31.43250900 |
| H | 13.30979000 | 18.68794700 | 30.95828500 |
| H | 13.34281100 | 17.41584000 | 32.23698200 |
| H | 13.74551600 | 17.37917200 | 21.84373700 |
| H | 12.21571400 | 17.79926200 | 22.62589300 |
| H | 13.68290800 | 18.65680900 | 23.11575400 |
| H | 9.76748300  | 13.18928000 | 21.85044800 |
| H | 8.48727000  | 13.17855900 | 23.12082400 |
| H | 9.23654300  | 14.69500700 | 22.60717600 |
| H | 18.74726000 | 13.55298100 | 31.08248800 |
| H | 17.88686700 | 15.03690400 | 31.51036500 |
| H | 17.44793900 | 13.53384100 | 32.33387900 |
| H | 9.64729500  | 13.49163200 | 32.19843600 |
| H | 8.38845600  | 13.45464200 | 30.90664000 |
| H | 9.24046600  | 11.97835800 | 31.37844000 |
| C | 18.00529500 | 13.28382000 | 22.93990900 |

|   |             |             |             |
|---|-------------|-------------|-------------|
| H | 18.87563300 | 13.88913400 | 23.21672700 |
| H | 18.33439200 | 12.23533000 | 22.93496500 |
| H | 17.66005700 | 13.53683000 | 21.93249100 |
| O | 13.73957500 | 9.82753900  | 25.26880200 |
| H | 14.45628500 | 9.18513500  | 25.23303000 |
| H | 12.93447300 | 11.41861900 | 22.85394100 |
| H | 13.79271200 | 10.80226700 | 24.03763700 |

### **Ir(CO)<sub>2</sub>@UiO-66 site-1**

Electronic Energy: -3882.2474418

Enthalpy: -3881.595930

Free Energy: -3881.736255

|    |             |             |             |
|----|-------------|-------------|-------------|
| O  | 13.76084100 | 11.69318700 | 23.29750800 |
| Zr | 13.67797000 | 13.49212400 | 24.54554100 |
| C  | 10.48247900 | 13.51746100 | 23.85898200 |
| C  | 9.43055900  | 13.62944900 | 22.79494800 |
| O  | 10.09578600 | 13.42032500 | 25.05938100 |
| O  | 11.68608800 | 13.52950000 | 23.48347800 |
| O  | 15.71646300 | 13.41993200 | 23.53164600 |
| O  | 13.61801600 | 15.44232200 | 23.47433900 |
| Zr | 13.71025500 | 10.96996600 | 27.08918000 |
| Zr | 11.12419400 | 13.41713100 | 27.02682700 |
| O  | 15.03732700 | 14.93617800 | 25.66198300 |
| O  | 12.31644300 | 12.00387900 | 25.60987600 |
| O  | 12.57466500 | 14.49961400 | 26.00032900 |
| O  | 14.72853700 | 12.47378500 | 26.04450800 |
| C  | 13.49592700 | 16.64233700 | 23.85446400 |
| C  | 13.29574100 | 17.68428400 | 22.79451300 |
| O  | 13.50528200 | 17.03130500 | 25.05584200 |
| C  | 16.90947300 | 13.43502200 | 23.95455100 |
| O  | 17.25513200 | 13.54202700 | 25.16246600 |
| Zr | 13.55639100 | 16.00199200 | 27.05149100 |
| Zr | 16.14163500 | 13.56840700 | 27.11141900 |
| H  | 11.71014500 | 11.46455100 | 25.08304100 |
| H  | 15.58530000 | 15.51708000 | 25.12854600 |
| H  | 11.57759900 | 15.40768600 | 28.99464400 |
| O  | 12.15888500 | 14.86885600 | 28.45242600 |
| O  | 15.49730700 | 17.11657400 | 27.13316300 |
| O  | 11.55912500 | 16.99092300 | 26.95447300 |
| O  | 13.55644900 | 17.06233700 | 29.02419000 |
| Zr | 13.58980800 | 13.49638200 | 29.57889600 |
| O  | 14.62709500 | 14.56906800 | 28.12282700 |
| H  | 15.63673600 | 11.59439300 | 29.08272000 |
| O  | 15.07372200 | 12.11581500 | 28.50530800 |
| O  | 11.72922300 | 9.88359500  | 27.16146600 |
| O  | 15.76129200 | 9.98370700  | 26.99539300 |
| O  | 13.68975400 | 9.91465300  | 29.04694500 |
| O  | 12.60202600 | 12.41910500 | 28.09881600 |
| O  | 17.15453200 | 13.66738200 | 29.11031300 |
| O  | 17.13057800 | 15.57800400 | 27.18372300 |
| O  | 17.28064900 | 11.63457600 | 27.08632500 |

|   |             |             |             |
|---|-------------|-------------|-------------|
| O | 10.04500000 | 13.33980900 | 28.99020700 |
| O | 10.11984200 | 11.44017800 | 27.05671800 |
| O | 10.01386400 | 15.36223700 | 26.94886100 |
| C | 10.36825400 | 16.57166100 | 26.87875800 |
| C | 9.29455800  | 17.59624600 | 26.66134400 |
| C | 13.61091100 | 16.68242900 | 30.22799500 |
| C | 13.76036900 | 17.74268300 | 31.27886000 |
| O | 13.57843900 | 15.48114700 | 30.61850800 |
| C | 16.94889000 | 10.42182000 | 26.99120900 |
| C | 18.05510100 | 9.41984000  | 26.83160200 |
| C | 13.57768500 | 10.30254300 | 30.24581800 |
| C | 13.40033200 | 9.24675300  | 31.29605400 |
| O | 13.57718800 | 11.50653800 | 30.62568600 |
| C | 16.70763100 | 16.76789400 | 27.23208400 |
| C | 10.52143200 | 10.24471200 | 27.15824800 |
| C | 9.48179700  | 9.17022800  | 27.28463300 |
| C | 16.74533900 | 13.71904700 | 30.30458500 |
| C | 17.77035700 | 13.95239300 | 31.37471400 |
| O | 15.54000500 | 13.61049200 | 30.66818200 |
| C | 10.41572100 | 13.28582000 | 30.19569400 |
| C | 9.35677700  | 13.06176900 | 31.23409300 |
| O | 11.61038600 | 13.38302500 | 30.59896000 |
| H | 9.58207900  | 18.56808000 | 27.07589000 |
| H | 9.15817500  | 17.72698700 | 25.57856900 |
| H | 8.33659700  | 17.26270600 | 27.07392400 |
| H | 9.59626700  | 8.66978700  | 28.25518400 |
| H | 8.46832500  | 9.57318400  | 27.19996500 |
| H | 9.64567700  | 8.39959200  | 26.52024200 |
| H | 18.93416900 | 9.71312800  | 27.41605300 |
| H | 17.72994900 | 8.41062600  | 27.10409200 |
| H | 18.36628900 | 9.40676200  | 25.77740700 |
| C | 17.72325600 | 17.85015900 | 27.45000700 |
| H | 17.38801600 | 18.80287700 | 27.02692900 |
| H | 17.84517900 | 17.99498900 | 28.53271600 |
| H | 18.70045600 | 17.56511500 | 27.04629400 |
| H | 13.77895000 | 9.58316500  | 32.26685000 |
| H | 12.32425400 | 9.05445600  | 31.41058400 |
| H | 13.87107000 | 8.30419200  | 30.99753200 |
| H | 14.83339900 | 17.91419400 | 31.44406800 |
| H | 13.32278300 | 18.69200400 | 30.95262600 |
| H | 13.32963800 | 17.42103200 | 32.23289300 |
| H | 13.74557400 | 17.37875400 | 21.84408000 |
| H | 12.21576000 | 17.79938200 | 22.62593600 |
| H | 13.68225700 | 18.65716700 | 23.11574100 |
| H | 9.59743100  | 12.86823000 | 22.02187900 |
| H | 8.42233600  | 13.53089200 | 23.20786100 |
| H | 9.52653900  | 14.60220100 | 22.29481100 |
| H | 18.74915500 | 13.55963000 | 31.08004500 |
| H | 17.88057700 | 15.03686600 | 31.51567100 |
| H | 17.45059900 | 13.52791400 | 32.33212000 |
| H | 9.65371000  | 13.47737600 | 32.20261100 |
| H | 8.39253300  | 13.46916600 | 30.91242500 |
| H | 9.22733600  | 11.97816000 | 31.36499800 |

|    |             |             |             |
|----|-------------|-------------|-------------|
| C  | 18.00529500 | 13.28382000 | 22.93990900 |
| H  | 18.88135900 | 13.87894800 | 23.22034300 |
| H  | 18.32762200 | 12.23297300 | 22.92683100 |
| H  | 17.66497200 | 13.54872300 | 21.93365800 |
| O  | 13.78415100 | 9.70525400  | 25.30133200 |
| H  | 14.62676700 | 9.24169100  | 25.23441200 |
| H  | 14.59592600 | 11.63405800 | 22.81958900 |
| Ir | 12.71589700 | 9.88915500  | 23.50785400 |
| C  | 11.80730100 | 8.32486200  | 23.81944900 |
| C  | 11.78441200 | 10.17942300 | 21.95296100 |
| O  | 11.23500200 | 7.34640400  | 24.04459600 |
| O  | 11.19722900 | 10.39217700 | 20.98056600 |

### Catalytic Hydrogenation Mechanism on UiO-66 site-1 (Figure 3)

#### Ir(C<sub>2</sub>H<sub>4</sub>)<sub>2</sub>@UiO-66 site-1

Electronic Energy: -3812.7981964

Enthalpy: -3812.054859

Free Energy: -3812.197856

|    |             |             |             |
|----|-------------|-------------|-------------|
| O  | 13.75938400 | 11.74282200 | 23.25675500 |
| Zr | 13.68724200 | 13.48440500 | 24.54115800 |
| C  | 10.48255300 | 13.51725800 | 23.85930100 |
| C  | 9.43058100  | 13.62937000 | 22.79491800 |
| O  | 10.08411100 | 13.39539200 | 25.05393100 |
| O  | 11.68576300 | 13.55472500 | 23.49321200 |
| O  | 15.72016900 | 13.44292800 | 23.52594400 |
| O  | 13.62283500 | 15.44380400 | 23.47301300 |
| Zr | 13.71898500 | 10.96482600 | 27.08187000 |
| Zr | 11.12292100 | 13.40813900 | 27.01801100 |
| O  | 15.03759000 | 14.93612500 | 25.66392500 |
| O  | 12.33090600 | 11.97549400 | 25.58178600 |
| O  | 12.57194700 | 14.48873200 | 26.00093500 |
| O  | 14.73439100 | 12.47249100 | 26.04346000 |
| C  | 13.49575800 | 16.64228000 | 23.85451700 |
| C  | 13.29563300 | 17.68423000 | 22.79448000 |
| O  | 13.50011200 | 17.02995200 | 25.05668600 |
| C  | 16.90956700 | 13.43504600 | 23.95458600 |
| O  | 17.25450600 | 13.53255500 | 25.16352700 |
| Zr | 13.55398400 | 15.99601300 | 27.05000700 |
| Zr | 16.14359400 | 13.56779300 | 27.11091000 |
| H  | 11.74776600 | 11.42385200 | 25.04231200 |
| H  | 15.58427000 | 15.51758000 | 25.12988300 |
| H  | 11.57761000 | 15.40673600 | 28.99365300 |
| O  | 12.15629500 | 14.86656100 | 28.45010900 |
| O  | 15.49727700 | 17.11576100 | 27.13370600 |
| O  | 11.55838300 | 16.99138900 | 26.95776200 |
| O  | 13.55589900 | 17.06206000 | 29.02402700 |
| Zr | 13.58730500 | 13.49485400 | 29.57277700 |
| O  | 14.62737500 | 14.56902900 | 28.12277500 |
| H  | 15.63557800 | 11.59586700 | 29.08368800 |

|   |             |             |             |
|---|-------------|-------------|-------------|
| O | 15.07389100 | 12.11739100 | 28.50518800 |
| O | 11.72894200 | 9.89336800  | 27.18628300 |
| O | 15.76517000 | 9.97828500  | 27.01562900 |
| O | 13.69500100 | 9.91263500  | 29.04862500 |
| O | 12.59895600 | 12.41956000 | 28.08801800 |
| O | 17.15622400 | 13.66700300 | 29.11071800 |
| O | 17.13228400 | 15.57844900 | 27.18317100 |
| O | 17.27983700 | 11.63530400 | 27.07858000 |
| O | 10.04526800 | 13.33242800 | 28.98927300 |
| O | 10.10795400 | 11.43439100 | 27.03233600 |
| O | 10.01409600 | 15.36124300 | 26.94130500 |
| C | 10.36830300 | 16.57167600 | 26.87877000 |
| C | 9.29455300  | 17.59624100 | 26.66134200 |
| C | 13.61095900 | 16.68247600 | 30.22802100 |
| C | 13.76036800 | 17.74268300 | 31.27886100 |
| O | 13.57790100 | 15.48099400 | 30.61819800 |
| C | 16.94891500 | 10.42184500 | 26.99119200 |
| C | 18.05508300 | 9.41981700  | 26.83162000 |
| C | 13.57749300 | 10.30257100 | 30.24572400 |
| C | 13.40022700 | 9.24672200  | 31.29600600 |
| O | 13.57170700 | 11.50742700 | 30.62376100 |
| C | 16.70774000 | 16.76796900 | 27.23204400 |
| C | 10.52148800 | 10.24496100 | 27.15807500 |
| C | 9.48180800  | 9.17021100  | 27.28457700 |
| C | 16.74543500 | 13.71902000 | 30.30464000 |
| C | 17.77035600 | 13.95237900 | 31.37471800 |
| O | 15.53995000 | 13.61084700 | 30.66730800 |
| C | 10.41575500 | 13.28584000 | 30.19569800 |
| C | 9.35677400  | 13.06176900 | 31.23409000 |
| O | 11.60958500 | 13.38634100 | 30.59937300 |
| H | 9.57618200  | 18.56435300 | 27.08871700 |
| H | 9.16984700  | 17.73912100 | 25.57867300 |
| H | 8.33301400  | 17.25733900 | 27.06102600 |
| H | 8.79069300  | 9.41652900  | 28.10073400 |
| H | 8.87548900  | 9.13505900  | 26.36913000 |
| H | 9.93278400  | 8.18867600  | 27.45952400 |
| H | 18.94319800 | 9.72500200  | 27.39595100 |
| H | 17.73614000 | 8.41536800  | 27.12824700 |
| H | 18.34824200 | 9.38633800  | 25.77264600 |
| C | 17.72325600 | 17.85016200 | 27.44999500 |
| H | 17.38595600 | 18.80433400 | 27.03179600 |
| H | 17.84976200 | 17.99078000 | 28.53274200 |
| H | 18.69905400 | 17.56722500 | 27.04131400 |
| H | 13.72813500 | 9.60056300  | 32.27883200 |
| H | 12.32927600 | 9.00991400  | 31.36672000 |
| H | 13.91872700 | 8.32212300  | 31.02047900 |
| H | 14.83332400 | 17.91435500 | 31.44441600 |
| H | 13.32270900 | 18.69198100 | 30.95255800 |
| H | 13.32935800 | 17.42101800 | 32.23279700 |
| H | 13.76580100 | 17.38794600 | 21.85087900 |
| H | 12.21685000 | 17.78081500 | 22.60756100 |
| H | 13.66133500 | 18.66259800 | 23.12327500 |
| H | 9.87011000  | 13.79686900 | 21.80693800 |



|    |             |             |             |
|----|-------------|-------------|-------------|
| H  | 8.82670400  | 12.71187200 | 22.77513700 |
| H  | 8.73968900  | 14.44578400 | 23.04117600 |
| H  | 18.74784800 | 13.55471500 | 31.08212500 |
| H  | 17.88504900 | 15.03693100 | 31.51150100 |
| H  | 17.44852800 | 13.53264900 | 32.33355000 |
| H  | 9.64693100  | 13.49191900 | 32.19843000 |
| H  | 8.38846900  | 13.45439800 | 30.90635600 |
| H  | 9.24086300  | 11.97833600 | 31.37863400 |
| C  | 18.00528100 | 13.28384700 | 22.93989000 |
| H  | 18.88834800 | 13.86428000 | 23.22918900 |
| H  | 18.31443500 | 12.22929100 | 22.91158300 |
| H  | 17.66934000 | 13.56722200 | 21.93716900 |
| O  | 13.78164400 | 9.65994300  | 25.35599800 |
| H  | 14.57246300 | 9.10893500  | 25.37081000 |
| H  | 14.52140500 | 11.77230600 | 22.66744600 |
| Ir | 12.90571700 | 9.80759500  | 23.42738100 |
| C  | 11.56074200 | 10.35630200 | 21.92597300 |
| H  | 10.62094800 | 9.79231700  | 21.92033900 |
| H  | 11.43967500 | 11.44599800 | 21.95000600 |
| C  | 12.72991400 | 9.80344100  | 21.35321900 |
| H  | 13.48032100 | 10.46678600 | 20.90347800 |
| H  | 12.70915900 | 8.80282600  | 20.90618600 |
| C  | 12.75576300 | 7.73142400  | 23.44332600 |
| H  | 12.73228600 | 7.27529500  | 22.44691400 |
| H  | 13.51734600 | 7.29834200  | 24.10482400 |
| C  | 11.58422100 | 8.29478100  | 24.00071200 |
| H  | 11.47243700 | 8.32708600  | 25.09118400 |
| H  | 10.63980300 | 8.27219800  | 23.44493800 |

### **Ir(C<sub>2</sub>H<sub>4</sub>)<sub>2</sub>H<sub>2</sub>@UiO-66 site-1**

Electronic Energy: -3813.9749169

Enthalpy: -3813.212387

Free Energy: -3813.353849

|    |             |             |             |
|----|-------------|-------------|-------------|
| Zr | 13.68175000 | 13.48275600 | 24.53218000 |
| C  | 10.48255300 | 13.51725800 | 23.85930100 |
| C  | 9.43058100  | 13.62937000 | 22.79491800 |
| O  | 10.08776300 | 13.39467500 | 25.05663600 |
| O  | 11.68053700 | 13.58507100 | 23.49015700 |
| O  | 15.72289600 | 13.47499400 | 23.52464900 |
| O  | 13.62460400 | 15.44464100 | 23.47211900 |
| Zr | 13.72837900 | 10.96295900 | 27.07617900 |
| Zr | 11.12862400 | 13.41070800 | 27.01672300 |
| O  | 15.03583500 | 14.92755100 | 25.66707600 |
| O  | 12.33931600 | 11.99784700 | 25.58721100 |
| O  | 12.57512900 | 14.49019700 | 26.00327000 |
| O  | 14.75856500 | 12.43666800 | 26.01058800 |
| C  | 13.49575800 | 16.64228000 | 23.85451700 |
| C  | 13.29563300 | 17.68423000 | 22.79448000 |
| O  | 13.50071900 | 17.02937100 | 25.05676600 |
| C  | 16.90956700 | 13.43504600 | 23.95458600 |

|    |             |             |             |
|----|-------------|-------------|-------------|
| O  | 17.25900200 | 13.53196700 | 25.16218200 |
| Zr | 13.55587800 | 15.99549200 | 27.04986200 |
| Zr | 16.14878400 | 13.56292300 | 27.10770200 |
| H  | 11.85409100 | 11.38614200 | 25.02761300 |
| H  | 15.58699400 | 15.49817800 | 25.12595500 |
| H  | 11.57878500 | 15.40255000 | 28.99455400 |
| O  | 12.15889900 | 14.86440300 | 28.45053300 |
| O  | 15.49734900 | 17.11529300 | 27.13330800 |
| O  | 11.55840300 | 16.99137700 | 26.95819400 |
| O  | 13.55730100 | 17.06185100 | 29.02381600 |
| Zr | 13.59061300 | 13.49131800 | 29.57268900 |
| O  | 14.62802200 | 14.56213400 | 28.11702300 |
| H  | 15.64804700 | 11.59317900 | 29.06925600 |
| O  | 15.08162800 | 12.12331700 | 28.50340800 |
| O  | 11.72643000 | 9.88022900  | 27.18711700 |
| O  | 15.76815200 | 9.98584300  | 27.04515000 |
| O  | 13.68547400 | 9.91571000  | 29.04734800 |
| O  | 12.60534000 | 12.41423300 | 28.08816300 |
| O  | 17.15729900 | 13.66795500 | 29.11068700 |
| O  | 17.13258100 | 15.57828300 | 27.18246400 |
| O  | 17.28554400 | 11.63946700 | 27.05507900 |
| O  | 10.04579700 | 13.33562800 | 28.98931200 |
| O  | 10.11615700 | 11.43515700 | 27.05222100 |
| O  | 10.01455000 | 15.36112900 | 26.94146300 |
| C  | 10.36830300 | 16.57167600 | 26.87877000 |
| C  | 9.29455300  | 17.59624100 | 26.66134200 |
| C  | 13.61095900 | 16.68247600 | 30.22802100 |
| C  | 13.76036800 | 17.74268300 | 31.27886100 |
| O  | 13.57849600 | 15.48087500 | 30.61770900 |
| C  | 16.94891500 | 10.42184500 | 26.99119200 |
| C  | 18.05508300 | 9.41981700  | 26.83162000 |
| C  | 13.57749300 | 10.30257100 | 30.24572400 |
| C  | 13.40022700 | 9.24672200  | 31.29600600 |
| O  | 13.57994900 | 11.50690900 | 30.62643000 |
| C  | 16.70774000 | 16.76796900 | 27.23204400 |
| C  | 10.52148800 | 10.24496100 | 27.15807500 |
| C  | 9.48180800  | 9.17021100  | 27.28457700 |
| C  | 16.74543500 | 13.71902000 | 30.30464000 |
| C  | 17.77035600 | 13.95237900 | 31.37471800 |
| O  | 15.54013600 | 13.61301000 | 30.66749900 |
| C  | 10.41575500 | 13.28584000 | 30.19569800 |
| C  | 9.35677400  | 13.06176900 | 31.23409000 |
| O  | 11.61005900 | 13.38218300 | 30.59955800 |
| H  | 9.57487600  | 18.56338900 | 27.09178300 |
| H  | 9.17229700  | 17.74184500 | 25.57875900 |
| H  | 8.33223300  | 17.25597100 | 27.05795400 |
| H  | 9.19249600  | 9.09005500  | 28.34190600 |
| H  | 8.57589400  | 9.42523000  | 26.72343700 |
| H  | 9.86979100  | 8.19480800  | 26.97285900 |
| H  | 18.91728300 | 9.69179900  | 27.45154200 |
| H  | 17.71788500 | 8.40444700  | 27.06383000 |
| H  | 18.39756800 | 9.44134500  | 25.78684200 |
| C  | 17.72325600 | 17.85016200 | 27.44999500 |

|    |             |             |             |
|----|-------------|-------------|-------------|
| H  | 17.38529800 | 18.80468600 | 27.03312100 |
| H  | 17.85111500 | 17.98962600 | 28.53273200 |
| H  | 18.69862200 | 17.56769000 | 27.03995700 |
| H  | 13.78016100 | 9.58218000  | 32.26666800 |
| H  | 12.32413800 | 9.05484000  | 31.41154700 |
| H  | 13.87081300 | 8.30425800  | 30.99674800 |
| H  | 14.83338200 | 17.91470100 | 31.44364000 |
| H  | 13.32217000 | 18.69188100 | 30.95292900 |
| H  | 13.33007400 | 17.42083500 | 32.23306100 |
| H  | 13.76210200 | 17.38598100 | 21.84970600 |
| H  | 12.21661900 | 17.78505600 | 22.61098300 |
| H  | 13.66557700 | 18.66159300 | 23.12164200 |
| H  | 9.76759300  | 13.16707000 | 21.86004400 |
| H  | 8.47837200  | 13.19736800 | 23.12004900 |
| H  | 9.26133300  | 14.69486800 | 22.58535900 |
| H  | 18.74741000 | 13.55294300 | 31.08303100 |
| H  | 17.88650200 | 15.03701800 | 31.50957200 |
| H  | 17.44776500 | 13.53462500 | 32.33416800 |
| H  | 9.64393100  | 13.49889800 | 32.19625300 |
| H  | 8.38663000  | 13.44750000 | 30.90367300 |
| H  | 9.24693000  | 11.97867400 | 31.38555800 |
| C  | 18.00528100 | 13.28384700 | 22.93989000 |
| H  | 18.66378700 | 14.16157200 | 22.97769000 |
| H  | 18.63306400 | 12.42083300 | 23.19846600 |
| H  | 17.61259100 | 13.16963600 | 21.92461800 |
| C  | 12.39026200 | 9.55542300  | 21.78945400 |
| C  | 11.83804200 | 9.59406100  | 23.08025000 |
| C  | 15.90099600 | 8.75986900  | 23.87668800 |
| C  | 16.00412400 | 10.15013700 | 23.76679900 |
| H  | 12.90661400 | 8.95796800  | 25.60208000 |
| H  | 14.42164800 | 12.06361800 | 22.51819700 |
| H  | 13.87991400 | 8.00415400  | 23.18316600 |
| H  | 14.58849700 | 9.53369500  | 21.77452900 |
| H  | 12.43366500 | 10.47533300 | 21.20082700 |
| H  | 12.39151000 | 8.63170200  | 21.20743300 |
| H  | 11.39789900 | 8.69991500  | 23.53143600 |
| H  | 11.44508700 | 10.55003400 | 23.44038400 |
| H  | 15.72479600 | 8.31084900  | 24.85764400 |
| H  | 16.33235200 | 8.10470200  | 23.11711500 |
| H  | 16.49692700 | 10.60180900 | 22.90092700 |
| H  | 15.90077600 | 10.79980200 | 24.64176600 |
| Ir | 13.98646700 | 9.57723300  | 23.23309300 |
| O  | 13.63500000 | 9.56539900  | 25.43485800 |
| O  | 13.74025400 | 11.81674900 | 23.15557200 |

### TS1@UiO-66 site-1

Electronic Energy: -3813.950687

Enthalpy: -3813.190384

Free Energy: -3813.330997

|   |           |           |           |
|---|-----------|-----------|-----------|
| O | 13.734078 | 11.757208 | 23.228624 |
|---|-----------|-----------|-----------|

|    |           |           |           |
|----|-----------|-----------|-----------|
| Zr | 13.678360 | 13.477522 | 24.541266 |
| C  | 10.482532 | 13.517328 | 23.859207 |
| C  | 9.430581  | 13.629390 | 22.794920 |
| O  | 10.081808 | 13.409082 | 25.054307 |
| O  | 11.684617 | 13.542336 | 23.492057 |
| O  | 15.720133 | 13.431610 | 23.527604 |
| O  | 13.617376 | 15.443526 | 23.473701 |
| Zr | 13.700964 | 10.973235 | 27.083280 |
| Zr | 11.122321 | 13.409036 | 27.014611 |
| O  | 15.036374 | 14.931886 | 25.663109 |
| O  | 12.338679 | 12.009757 | 25.616443 |
| O  | 12.570307 | 14.498448 | 26.000639 |
| O  | 14.750566 | 12.459502 | 26.034747 |
| C  | 13.495917 | 16.642293 | 23.854512 |
| C  | 13.295622 | 17.684250 | 22.794502 |
| O  | 13.505292 | 17.032603 | 25.056210 |
| C  | 16.909550 | 13.434906 | 23.954667 |
| O  | 17.257222 | 13.535623 | 25.162656 |
| Zr | 13.553255 | 15.996591 | 27.048051 |
| Zr | 16.139789 | 13.566616 | 27.110398 |
| H  | 11.857767 | 11.407359 | 25.027620 |
| H  | 15.582975 | 15.513102 | 25.128841 |
| H  | 11.575895 | 15.405437 | 28.992688 |
| O  | 12.157025 | 14.866502 | 28.450576 |
| O  | 15.497567 | 17.116061 | 27.133423 |
| O  | 11.558149 | 16.992536 | 26.956940 |
| O  | 13.556112 | 17.061970 | 29.024437 |
| Zr | 13.586887 | 13.495833 | 29.576517 |
| O  | 14.626864 | 14.567321 | 28.122678 |
| H  | 15.630882 | 11.593324 | 29.083080 |
| O  | 15.070679 | 12.115596 | 28.503948 |
| O  | 11.726811 | 9.884559  | 27.170452 |
| O  | 15.762271 | 9.982132  | 26.989523 |
| O  | 13.689689 | 9.913651  | 29.047999 |
| O  | 12.596016 | 12.417970 | 28.100889 |
| O  | 17.155649 | 13.666513 | 29.110922 |
| O  | 17.132127 | 15.578424 | 27.182875 |
| O  | 17.283705 | 11.631925 | 27.095191 |
| O  | 10.045193 | 13.335785 | 28.990172 |
| O  | 10.115351 | 11.437476 | 27.044581 |
| O  | 10.013114 | 15.362250 | 26.944145 |
| C  | 10.368263 | 16.571680 | 26.878754 |
| C  | 9.294558  | 17.596246 | 26.661341 |
| C  | 13.610903 | 16.682464 | 30.228009 |
| C  | 13.760404 | 17.742680 | 31.278859 |
| O  | 13.578212 | 15.481341 | 30.619476 |
| C  | 16.948888 | 10.421930 | 26.991048 |
| C  | 18.055074 | 9.419797  | 26.831688 |
| C  | 13.577646 | 10.302563 | 30.245734 |
| C  | 13.400218 | 9.246746  | 31.296028 |
| O  | 13.576409 | 11.506394 | 30.627109 |
| C  | 16.707690 | 16.767947 | 27.232049 |
| C  | 10.521462 | 10.244859 | 27.158152 |

|    |           |           |           |
|----|-----------|-----------|-----------|
| C  | 9.481804  | 9.170218  | 27.284605 |
| C  | 16.745381 | 13.719027 | 30.304616 |
| C  | 17.770363 | 13.952374 | 31.374713 |
| O  | 15.540293 | 13.610551 | 30.668509 |
| C  | 10.415711 | 13.285825 | 30.195705 |
| C  | 9.356779  | 13.061769 | 31.234095 |
| O  | 11.609623 | 13.385442 | 30.601088 |
| H  | 9.577009  | 18.565014 | 27.086756 |
| H  | 9.167801  | 17.737503 | 25.578676 |
| H  | 8.333575  | 17.258231 | 27.063199 |
| H  | 8.489204  | 9.587328  | 27.480012 |
| H  | 9.445286  | 8.598211  | 26.346649 |
| H  | 9.762533  | 8.461474  | 28.072664 |
| H  | 17.727484 | 8.408579  | 27.094245 |
| H  | 18.376051 | 9.415365  | 25.780206 |
| H  | 18.929709 | 9.707165  | 27.425800 |
| C  | 17.723264 | 17.850155 | 27.449992 |
| H  | 17.386833 | 18.803754 | 27.029697 |
| H  | 17.848118 | 17.992729 | 28.532685 |
| H  | 18.699638 | 17.566439 | 27.043171 |
| H  | 13.788705 | 9.578721  | 32.264619 |
| H  | 12.323531 | 9.063359  | 31.419254 |
| H  | 13.861640 | 8.300926  | 30.993188 |
| H  | 14.833383 | 17.912165 | 31.446583 |
| H  | 13.325179 | 18.692805 | 30.951655 |
| H  | 13.326957 | 17.422124 | 32.232109 |
| H  | 13.752102 | 17.381376 | 21.846283 |
| H  | 12.215927 | 17.793038 | 22.619920 |
| H  | 13.675486 | 18.659299 | 23.117359 |
| H  | 8.812090  | 12.721457 | 22.790780 |
| H  | 8.752899  | 14.460065 | 23.029969 |
| H  | 9.870657  | 13.776714 | 21.803921 |
| H  | 18.748867 | 13.558254 | 31.080648 |
| H  | 17.881926 | 15.036836 | 31.514850 |
| H  | 17.450173 | 13.529038 | 32.332552 |
| H  | 9.652958  | 13.478256 | 32.202547 |
| H  | 8.392253  | 13.468497 | 30.912156 |
| H  | 9.227933  | 11.978143 | 31.365581 |
| C  | 18.005275 | 13.283925 | 22.939871 |
| H  | 18.886576 | 13.868582 | 23.226147 |
| H  | 18.318429 | 12.230386 | 22.915677 |
| H  | 17.667943 | 13.561933 | 21.936037 |
| O  | 13.759857 | 9.618101  | 25.361120 |
| H  | 14.672969 | 9.305964  | 25.351955 |
| H  | 14.606784 | 11.756446 | 22.820768 |
| Ir | 13.044599 | 9.668056  | 23.348873 |
| C  | 11.694388 | 10.109230 | 21.772593 |
| H  | 10.826469 | 9.444073  | 21.765188 |
| H  | 11.460760 | 11.177237 | 21.780596 |
| C  | 12.933804 | 9.682714  | 21.247057 |
| H  | 13.621134 | 10.421321 | 20.822213 |
| H  | 13.027364 | 8.678124  | 20.818948 |
| C  | 13.859446 | 7.660147  | 23.226537 |

|   |           |           |           |
|---|-----------|-----------|-----------|
| H | 14.186928 | 7.270006  | 22.256989 |
| H | 14.539938 | 7.369526  | 24.035351 |
| C | 12.441998 | 7.698559  | 23.521712 |
| H | 12.129305 | 7.445574  | 24.540628 |
| H | 11.745650 | 7.354682  | 22.746456 |
| H | 14.571463 | 9.009141  | 22.995449 |
| H | 11.638418 | 10.281410 | 23.949510 |

**Ir(C<sub>2</sub>H<sub>5</sub>) (C<sub>2</sub>H<sub>4</sub>) H@UiO-66 site-1**

Electronic Energy: -3813.977509

Enthalpy: -3813.212808

Free Energy: -3813.357084

|    |           |           |           |
|----|-----------|-----------|-----------|
| O  | 13.776581 | 11.755678 | 23.250496 |
| Zr | 13.694579 | 13.489603 | 24.544594 |
| C  | 10.482506 | 13.517317 | 23.859331 |
| C  | 9.430581  | 13.629344 | 22.794916 |
| O  | 10.087602 | 13.399311 | 25.056268 |
| O  | 11.684359 | 13.567244 | 23.491130 |
| O  | 15.723308 | 13.481484 | 23.523510 |
| O  | 13.622890 | 15.443700 | 23.473603 |
| Zr | 13.723382 | 10.972085 | 27.077446 |
| Zr | 11.124880 | 13.410236 | 27.017429 |
| O  | 15.040757 | 14.937468 | 25.668909 |
| O  | 12.345862 | 11.976015 | 25.574743 |
| O  | 12.575174 | 14.489117 | 26.003766 |
| O  | 14.739175 | 12.465696 | 26.037864 |
| C  | 13.495725 | 16.642244 | 23.854588 |
| C  | 13.295702 | 17.684195 | 22.794433 |
| O  | 13.500723 | 17.029843 | 25.056532 |
| C  | 16.909502 | 13.435107 | 23.954625 |
| O  | 17.253017 | 13.514403 | 25.166585 |
| Zr | 13.556659 | 15.996379 | 27.051982 |
| Zr | 16.151401 | 13.564687 | 27.110233 |
| H  | 11.790960 | 11.414958 | 25.020703 |
| H  | 15.589318 | 15.511356 | 25.128633 |
| H  | 11.578458 | 15.404797 | 28.995224 |
| O  | 12.157625 | 14.865691 | 28.451122 |
| O  | 15.497307 | 17.116143 | 27.135879 |
| O  | 11.558435 | 16.991071 | 26.957241 |
| O  | 13.555768 | 17.062280 | 29.024199 |
| Zr | 13.590861 | 13.495235 | 29.573430 |
| O  | 14.628734 | 14.567009 | 28.121628 |
| H  | 15.639276 | 11.591289 | 29.075457 |
| O  | 15.076131 | 12.121531 | 28.506369 |
| O  | 11.726968 | 9.889203  | 27.205935 |
| O  | 15.764150 | 9.982428  | 27.032425 |
| O  | 13.695171 | 9.915979  | 29.047073 |
| O  | 12.606160 | 12.419581 | 28.083551 |
| O  | 17.157150 | 13.668061 | 29.111179 |
| O  | 17.133268 | 15.578773 | 27.182739 |

|   |           |           |           |
|---|-----------|-----------|-----------|
| O | 17.280829 | 11.637208 | 27.074153 |
| O | 10.045874 | 13.333533 | 28.989012 |
| O | 10.115115 | 11.437935 | 27.036786 |
| O | 10.014087 | 15.361198 | 26.942681 |
| C | 10.368272 | 16.571715 | 26.878764 |
| C | 9.294553  | 17.596241 | 26.661342 |
| C | 13.610976 | 16.682521 | 30.228016 |
| C | 13.760335 | 17.742681 | 31.278868 |
| O | 13.578802 | 15.481076 | 30.618194 |
| C | 16.948933 | 10.421798 | 26.991354 |
| C | 18.055094 | 9.419853  | 26.831469 |
| C | 13.577513 | 10.302571 | 30.245659 |
| C | 13.400271 | 9.246691  | 31.295983 |
| O | 13.571993 | 11.506914 | 30.625158 |
| C | 16.707724 | 16.767975 | 27.232066 |
| C | 10.521538 | 10.244951 | 27.158088 |
| C | 9.481796  | 9.170215  | 27.284511 |
| C | 16.745462 | 13.719060 | 30.304631 |
| C | 17.770348 | 13.952376 | 31.374726 |
| O | 15.540047 | 13.611972 | 30.667763 |
| C | 10.415742 | 13.285873 | 30.195697 |
| C | 9.356776  | 13.061768 | 31.234092 |
| O | 11.609995 | 13.384179 | 30.598899 |
| H | 9.575032  | 18.563354 | 27.091762 |
| H | 9.172349  | 17.742086 | 25.578791 |
| H | 8.332219  | 17.256130 | 27.058019 |
| H | 9.265909  | 9.020169  | 28.351943 |
| H | 8.544721  | 9.461565  | 26.797539 |
| H | 9.845678  | 8.216376  | 26.887131 |
| H | 18.974673 | 9.767583  | 27.314009 |
| H | 17.762602 | 8.436892  | 27.215358 |
| H | 18.271805 | 9.307740  | 25.759662 |
| C | 17.723254 | 17.850164 | 27.449996 |
| H | 17.384908 | 18.805141 | 27.034475 |
| H | 17.851951 | 17.988403 | 28.532796 |
| H | 18.698351 | 17.568376 | 27.038844 |
| H | 13.786336 | 9.580639  | 32.264788 |
| H | 12.323827 | 9.060604  | 31.417316 |
| H | 13.864992 | 8.301982  | 30.994860 |
| H | 14.833330 | 17.914639 | 31.443868 |
| H | 13.322254 | 18.691883 | 30.952855 |
| H | 13.329913 | 17.420824 | 32.233000 |
| H | 13.754282 | 17.382409 | 21.846938 |
| H | 12.216169 | 17.792171 | 22.618281 |
| H | 13.674095 | 18.659310 | 23.118623 |
| H | 9.830186  | 13.377343 | 21.807307 |
| H | 8.562158  | 13.004100 | 23.032964 |
| H | 9.074910  | 14.668847 | 22.762674 |
| H | 18.747206 | 13.552435 | 31.083109 |
| H | 17.887030 | 15.037001 | 31.509270 |
| H | 17.447624 | 13.535053 | 32.334308 |
| H | 9.646236  | 13.493784 | 32.197821 |
| H | 8.387925  | 13.452469 | 30.905712 |

|    |           |           |           |
|----|-----------|-----------|-----------|
| H  | 9.242479  | 11.978431 | 31.380359 |
| C  | 18.005282 | 13.283712 | 22.939911 |
| H  | 18.924056 | 13.776137 | 23.276013 |
| H  | 18.234070 | 12.214331 | 22.827265 |
| H  | 17.698114 | 13.664278 | 21.960135 |
| O  | 13.707948 | 9.648358  | 25.325833 |
| H  | 13.994067 | 8.756247  | 25.552235 |
| H  | 14.254891 | 11.964474 | 22.439101 |
| Ir | 13.159439 | 9.695457  | 23.307575 |
| C  | 12.228503 | 9.990703  | 21.444098 |
| H  | 11.430144 | 9.281086  | 21.205089 |
| H  | 11.937195 | 11.044615 | 21.349554 |
| C  | 13.578937 | 9.612510  | 21.268411 |
| H  | 14.336711 | 10.365484 | 21.010112 |
| H  | 13.831826 | 8.611189  | 20.907223 |
| C  | 11.444132 | 8.568058  | 23.704591 |
| H  | 11.262251 | 7.781836  | 22.956255 |
| H  | 11.621388 | 8.060369  | 24.667566 |
| C  | 10.243341 | 9.482756  | 23.805483 |
| H  | 10.339334 | 10.258249 | 24.583685 |
| H  | 10.020192 | 10.003719 | 22.862808 |
| H  | 9.336527  | 8.912049  | 24.073467 |
| H  | 13.452841 | 8.162905  | 23.263940 |

**TS2@UiO-66 site-1**

Electronic Energy: -3813.96748

Enthalpy: -3813.204687

Free Energy: -3813.348309

|    |           |           |           |
|----|-----------|-----------|-----------|
| O  | 13.751465 | 11.740081 | 23.247558 |
| Zr | 13.684107 | 13.484025 | 24.538563 |
| C  | 10.482642 | 13.517309 | 23.859166 |
| C  | 9.430547  | 13.629355 | 22.794950 |
| O  | 10.082814 | 13.395681 | 25.053433 |
| O  | 11.686362 | 13.554500 | 23.494469 |
| O  | 15.719196 | 13.429771 | 23.527798 |
| O  | 13.622828 | 15.444140 | 23.472649 |
| Zr | 13.716444 | 10.963313 | 27.084311 |
| Zr | 11.124293 | 13.410448 | 27.020213 |
| O  | 15.037047 | 14.934809 | 25.662130 |
| O  | 12.322134 | 11.988196 | 25.594340 |
| O  | 12.572293 | 14.492379 | 26.000252 |
| O  | 14.734546 | 12.469899 | 26.040602 |
| C  | 13.495711 | 16.642409 | 23.854447 |
| C  | 13.295621 | 17.684240 | 22.794492 |
| O  | 13.500607 | 17.030487 | 25.056546 |
| C  | 16.909505 | 13.435325 | 23.954075 |
| O  | 17.255235 | 13.539233 | 25.162312 |
| Zr | 13.554416 | 15.996739 | 27.049217 |
| Zr | 16.141552 | 13.567159 | 27.109636 |
| H  | 11.741829 | 11.440558 | 25.047320 |



|    |           |           |           |
|----|-----------|-----------|-----------|
| H  | 15.584739 | 15.516582 | 25.129458 |
| H  | 11.577769 | 15.408140 | 28.993808 |
| O  | 12.156619 | 14.867696 | 28.450734 |
| O  | 15.497411 | 17.116037 | 27.132642 |
| O  | 11.558219 | 16.991737 | 26.958254 |
| O  | 13.556447 | 17.062070 | 29.024164 |
| Zr | 13.587802 | 13.495154 | 29.573575 |
| O  | 14.627383 | 14.569047 | 28.122456 |
| H  | 15.637265 | 11.596641 | 29.082985 |
| O  | 15.073871 | 12.116567 | 28.504721 |
| O  | 11.727964 | 9.891136  | 27.183647 |
| O  | 15.764898 | 9.979413  | 27.010464 |
| O  | 13.693619 | 9.911759  | 29.049121 |
| O  | 12.599006 | 12.420414 | 28.092137 |
| O  | 17.155597 | 13.666849 | 29.110676 |
| O  | 17.131730 | 15.578302 | 27.183532 |
| O  | 17.280481 | 11.635133 | 27.079903 |
| O  | 10.044818 | 13.335343 | 28.989857 |
| O  | 10.107267 | 11.435258 | 27.045361 |
| O  | 10.014016 | 15.361336 | 26.941244 |
| C  | 10.368382 | 16.571592 | 26.878789 |
| C  | 9.294553  | 17.596243 | 26.661349 |
| C  | 13.611018 | 16.682391 | 30.228043 |
| C  | 13.760334 | 17.742698 | 31.278851 |
| O  | 13.577773 | 15.481044 | 30.618585 |
| C  | 16.948893 | 10.421711 | 26.991479 |
| C  | 18.055097 | 9.419844  | 26.831552 |
| C  | 13.577348 | 10.302584 | 30.245937 |
| C  | 13.400251 | 9.246704  | 31.295992 |
| O  | 13.572960 | 11.507130 | 30.624413 |
| C  | 16.707781 | 16.767921 | 27.232066 |
| C  | 10.521501 | 10.244881 | 27.158186 |
| C  | 9.481790  | 9.170223  | 27.284535 |
| C  | 16.745385 | 13.719009 | 30.304674 |
| C  | 17.770359 | 13.952393 | 31.374712 |
| O  | 15.539988 | 13.610563 | 30.667869 |
| C  | 10.415812 | 13.285811 | 30.195702 |
| C  | 9.356763  | 13.061788 | 31.234082 |
| O  | 11.609615 | 13.385161 | 30.599819 |
| H  | 9.576060  | 18.564231 | 27.089089 |
| H  | 9.170113  | 17.739491 | 25.578693 |
| H  | 8.332908  | 17.257223 | 27.060705 |
| H  | 9.043995  | 9.218968  | 28.291352 |
| H  | 8.658780  | 9.342440  | 26.580141 |
| H  | 9.910188  | 8.173356  | 27.139281 |
| H  | 18.941410 | 9.722204  | 27.400250 |
| H  | 17.734657 | 8.414194  | 27.122405 |
| H  | 18.352080 | 9.391145  | 25.773504 |
| C  | 17.723240 | 17.850174 | 27.450007 |
| H  | 17.386713 | 18.803737 | 27.029787 |
| H  | 17.848082 | 17.992574 | 28.532717 |
| H  | 18.699580 | 17.566433 | 27.043186 |
| H  | 13.733581 | 9.598439  | 32.277790 |

|    |           |           |           |
|----|-----------|-----------|-----------|
| H  | 12.328628 | 9.014358  | 31.371468 |
| H  | 13.913867 | 8.320225  | 31.017707 |
| H  | 14.833284 | 17.914353 | 31.444489 |
| H  | 13.322762 | 18.692000 | 30.952423 |
| H  | 13.329227 | 17.421185 | 32.232804 |
| H  | 13.767584 | 17.388713 | 21.851538 |
| H  | 12.217000 | 17.779057 | 22.605696 |
| H  | 13.659322 | 18.663125 | 23.123959 |
| H  | 9.869281  | 13.790938 | 21.805618 |
| H  | 8.822009  | 12.714934 | 22.779983 |
| H  | 8.744262  | 14.450414 | 23.038822 |
| H  | 18.748337 | 13.556516 | 31.081325 |
| H  | 17.883463 | 15.036910 | 31.513110 |
| H  | 17.449370 | 13.530862 | 32.333048 |
| H  | 9.646251  | 13.493524 | 32.197937 |
| H  | 8.388112  | 13.452959 | 30.905648 |
| H  | 9.242008  | 11.978442 | 31.380390 |
| C  | 18.005352 | 13.283768 | 22.939979 |
| H  | 18.886503 | 13.868441 | 23.226465 |
| H  | 18.317886 | 12.230082 | 22.916730 |
| H  | 17.668199 | 13.560758 | 21.935866 |
| O  | 13.772606 | 9.662018  | 25.362795 |
| H  | 14.623719 | 9.212163  | 25.314483 |
| H  | 14.599951 | 11.691597 | 22.793246 |
| Ir | 12.848384 | 9.849127  | 23.455845 |
| C  | 11.488005 | 10.438572 | 21.985667 |
| H  | 10.502788 | 9.959522  | 22.051403 |
| H  | 11.456433 | 11.533917 | 21.955657 |
| C  | 12.584505 | 9.768188  | 21.390551 |
| H  | 13.358119 | 10.354804 | 20.879024 |
| H  | 12.468383 | 8.755569  | 20.986514 |
| C  | 10.753399 | 7.290697  | 23.146743 |
| H  | 10.389445 | 7.780188  | 22.232342 |
| H  | 11.404414 | 6.462014  | 22.831621 |
| C  | 11.454435 | 8.261366  | 24.075687 |
| H  | 11.818553 | 7.767181  | 24.990123 |
| H  | 10.748512 | 9.039127  | 24.413015 |
| H  | 12.686889 | 8.258101  | 23.429476 |
| H  | 9.878107  | 6.843503  | 23.640347 |

### **Ir(C<sub>2</sub>H<sub>6</sub>) (C<sub>2</sub>H<sub>4</sub>)@UiO-66 site-1**

Electronic Energy: -3813.973599

Enthalpy: -3813.207319

Free Energy: -3813.352491

|    |           |           |           |
|----|-----------|-----------|-----------|
| O  | 13.754634 | 11.718302 | 23.261198 |
| Zr | 13.680985 | 13.486351 | 24.545210 |
| C  | 10.482553 | 13.517258 | 23.859301 |
| C  | 9.430581  | 13.629370 | 22.794918 |
| O  | 10.082032 | 13.403090 | 25.053792 |
| O  | 11.687174 | 13.549196 | 23.495142 |

|    |           |           |           |
|----|-----------|-----------|-----------|
| O  | 15.717506 | 13.419677 | 23.531020 |
| O  | 13.622199 | 15.443693 | 23.473402 |
| Zr | 13.716851 | 10.968067 | 27.081096 |
| Zr | 11.121801 | 13.407948 | 27.017313 |
| O  | 15.036845 | 14.936097 | 25.662706 |
| O  | 12.324859 | 11.996808 | 25.598672 |
| O  | 12.572723 | 14.494770 | 26.000465 |
| O  | 14.741256 | 12.470996 | 26.040186 |
| C  | 13.495758 | 16.642280 | 23.854517 |
| C  | 13.295633 | 17.684230 | 22.794480 |
| O  | 13.501181 | 17.030940 | 25.056475 |
| C  | 16.909567 | 13.435046 | 23.954586 |
| O  | 17.256792 | 13.545855 | 25.161676 |
| Zr | 13.554395 | 15.998526 | 27.050427 |
| Zr | 16.143542 | 13.568464 | 27.110495 |
| H  | 11.797710 | 11.429158 | 25.014157 |
| H  | 15.582875 | 15.517935 | 25.128419 |
| H  | 11.576902 | 15.406842 | 28.992723 |
| O  | 12.156465 | 14.867117 | 28.449674 |
| O  | 15.497476 | 17.116317 | 27.132948 |
| O  | 11.558232 | 16.992164 | 26.957974 |
| O  | 13.556315 | 17.062669 | 29.024242 |
| Zr | 13.587214 | 13.495097 | 29.572771 |
| O  | 14.627603 | 14.569481 | 28.122216 |
| H  | 15.635888 | 11.596475 | 29.083689 |
| O  | 15.074161 | 12.117330 | 28.504679 |
| O  | 11.728428 | 9.891002  | 27.173992 |
| O  | 15.764519 | 9.980273  | 27.007252 |
| O  | 13.690878 | 9.912633  | 29.048130 |
| O  | 12.597969 | 12.420410 | 28.091777 |
| O  | 17.156355 | 13.666940 | 29.110829 |
| O  | 17.132026 | 15.578617 | 27.183902 |
| O  | 17.281325 | 11.635063 | 27.080504 |
| O  | 10.044728 | 13.334517 | 28.989806 |
| O  | 10.105760 | 11.434137 | 27.044903 |
| O  | 10.014136 | 15.361558 | 26.941765 |
| C  | 10.368303 | 16.571676 | 26.878770 |
| C  | 9.294553  | 17.596241 | 26.661342 |
| C  | 13.610959 | 16.682476 | 30.228021 |
| C  | 13.760368 | 17.742683 | 31.278861 |
| O  | 13.577617 | 15.481136 | 30.618116 |
| C  | 16.948915 | 10.421845 | 26.991192 |
| C  | 18.055083 | 9.419817  | 26.831620 |
| C  | 13.577493 | 10.302571 | 30.245724 |
| C  | 13.400227 | 9.246722  | 31.296006 |
| O  | 13.574748 | 11.506976 | 30.624883 |
| C  | 16.707740 | 16.767969 | 27.232044 |
| C  | 10.521488 | 10.244961 | 27.158075 |
| C  | 9.481808  | 9.170211  | 27.284577 |
| C  | 16.745435 | 13.719020 | 30.304640 |
| C  | 17.770356 | 13.952379 | 31.374718 |
| O  | 15.540016 | 13.611062 | 30.667414 |
| C  | 10.415755 | 13.285840 | 30.195698 |

|    |           |           |           |
|----|-----------|-----------|-----------|
| C  | 9.356774  | 13.061769 | 31.234090 |
| O  | 11.609661 | 13.385349 | 30.599729 |
| H  | 9.575857  | 18.564168 | 27.089372 |
| H  | 9.170337  | 17.739753 | 25.578698 |
| H  | 8.332833  | 17.257058 | 27.060377 |
| H  | 8.811249  | 9.402007  | 28.121972 |
| H  | 8.851456  | 9.155815  | 26.384860 |
| H  | 9.933451  | 8.184398  | 27.432037 |
| H  | 18.940788 | 9.721280  | 27.401736 |
| H  | 17.734121 | 8.413860  | 27.120883 |
| H  | 18.353283 | 9.392308  | 25.773884 |
| C  | 17.723256 | 17.850162 | 27.449995 |
| H  | 17.386674 | 18.803925 | 27.030270 |
| H  | 17.848425 | 17.992092 | 28.532731 |
| H  | 18.699482 | 17.566565 | 27.042795 |
| H  | 13.759945 | 9.589359  | 32.271810 |
| H  | 12.325624 | 9.037705  | 31.393978 |
| H  | 13.889358 | 8.310806  | 31.005829 |
| H  | 14.833324 | 17.915666 | 31.443081 |
| H  | 13.321284 | 18.691529 | 30.953124 |
| H  | 13.330827 | 17.420529 | 32.233296 |
| H  | 13.763335 | 17.386744 | 21.850031 |
| H  | 12.216674 | 17.782776 | 22.609612 |
| H  | 13.663745 | 18.661993 | 23.122397 |
| H  | 9.869190  | 13.801732 | 21.807346 |
| H  | 8.831747  | 12.708678 | 22.771578 |
| H  | 8.736088  | 14.441615 | 23.044605 |
| H  | 18.747891 | 13.554797 | 31.082131 |
| H  | 17.884993 | 15.036932 | 31.511572 |
| H  | 17.448592 | 13.532601 | 32.333563 |
| H  | 9.647980  | 13.489544 | 32.199181 |
| H  | 8.389157  | 13.457026 | 30.907414 |
| H  | 9.238458  | 11.978323 | 31.376639 |
| C  | 18.005281 | 13.283847 | 22.939890 |
| H  | 18.884187 | 13.873248 | 23.223453 |
| H  | 18.321757 | 12.231265 | 22.920853 |
| H  | 17.666289 | 13.555204 | 21.934842 |
| O  | 13.764196 | 9.665736  | 25.358790 |
| H  | 14.620069 | 9.224400  | 25.308006 |
| H  | 14.611786 | 11.648090 | 22.824669 |
| Ir | 12.870841 | 9.874531  | 23.431582 |
| C  | 11.498083 | 10.416079 | 21.963622 |
| H  | 10.547983 | 9.865492  | 22.001644 |
| H  | 11.383837 | 11.505944 | 21.932842 |
| C  | 12.643080 | 9.824489  | 21.369717 |
| H  | 13.380657 | 10.464819 | 20.868773 |
| H  | 12.589374 | 8.813687  | 20.945023 |
| C  | 11.827898 | 6.986328  | 25.080604 |
| H  | 12.509736 | 6.162489  | 24.827597 |
| H  | 12.273954 | 7.559061  | 25.904243 |
| C  | 11.546761 | 7.879510  | 23.896096 |
| H  | 10.933124 | 8.747533  | 24.174543 |
| H  | 11.021704 | 7.375895  | 23.069343 |

|   |           |          |           |
|---|-----------|----------|-----------|
| H | 10.897589 | 6.534217 | 25.452358 |
| H | 12.564386 | 8.104656 | 23.378145 |

### Catalytic Dimerization Mechanism on UiO-66 site-1 (Figure 4)

#### TS1@UiO-66 site-1

Electronic Energy: -3813.912206

Enthalpy: -3813.151149

Free Energy: -3813.290946

|    |           |           |           |
|----|-----------|-----------|-----------|
| O  | 13.636015 | 11.810254 | 23.187611 |
| Zr | 13.692421 | 13.478003 | 24.531469 |
| C  | 10.482600 | 13.517226 | 23.859328 |
| C  | 9.430578  | 13.629355 | 22.794919 |
| O  | 10.090717 | 13.427628 | 25.055970 |
| O  | 11.683105 | 13.545282 | 23.479064 |
| O  | 15.723190 | 13.478513 | 23.535302 |
| O  | 13.611302 | 15.442866 | 23.474880 |
| Zr | 13.723538 | 10.962226 | 27.074128 |
| Zr | 11.131761 | 13.412927 | 27.020524 |
| O  | 15.044228 | 14.928566 | 25.670531 |
| O  | 12.315575 | 12.006506 | 25.614464 |
| O  | 12.580170 | 14.492084 | 25.996473 |
| O  | 14.768650 | 12.419587 | 25.990515 |
| C  | 13.495702 | 16.642275 | 23.854484 |
| C  | 13.295595 | 17.684231 | 22.794488 |
| O  | 13.511208 | 17.031909 | 25.056393 |
| C  | 16.909582 | 13.435097 | 23.954503 |
| O  | 17.265671 | 13.518678 | 25.165680 |
| Zr | 13.558718 | 15.996291 | 27.045689 |
| Zr | 16.150881 | 13.562374 | 27.102786 |
| H  | 11.860745 | 11.406462 | 25.017335 |
| H  | 15.598105 | 15.492869 | 25.125587 |
| H  | 11.579843 | 15.402000 | 28.990330 |
| O  | 12.161876 | 14.863843 | 28.448288 |
| O  | 15.497566 | 17.115480 | 27.135226 |
| O  | 11.559181 | 16.990836 | 26.952957 |
| O  | 13.557257 | 17.061014 | 29.023708 |
| Zr | 13.592825 | 13.491743 | 29.573610 |
| O  | 14.628598 | 14.558102 | 28.112771 |
| H  | 15.649486 | 11.592089 | 29.060413 |
| O  | 15.081088 | 12.121649 | 28.495949 |
| O  | 11.727271 | 9.878207  | 27.172962 |
| O  | 15.767211 | 9.986108  | 27.032982 |
| O  | 13.683412 | 9.915519  | 29.046817 |
| O  | 12.609023 | 12.413325 | 28.091239 |
| O  | 17.156707 | 13.667954 | 29.110428 |
| O  | 17.133199 | 15.578156 | 27.183935 |
| O  | 17.291289 | 11.635251 | 27.070388 |
| O  | 10.046085 | 13.338815 | 28.989709 |

|   |           |           |           |
|---|-----------|-----------|-----------|
| O | 10.114951 | 11.435932 | 27.068184 |
| O | 10.014665 | 15.361689 | 26.947569 |
| C | 10.368338 | 16.571660 | 26.878783 |
| C | 9.294553  | 17.596241 | 26.661343 |
| C | 13.610984 | 16.682462 | 30.228036 |
| C | 13.760369 | 17.742684 | 31.278860 |
| O | 13.579674 | 15.480490 | 30.617641 |
| C | 16.948905 | 10.421831 | 26.991233 |
| C | 18.055078 | 9.419810  | 26.831629 |
| C | 13.577415 | 10.302575 | 30.245749 |
| C | 13.400196 | 9.246723  | 31.296001 |
| O | 13.583459 | 11.506857 | 30.626220 |
| C | 16.707774 | 16.767973 | 27.232036 |
| C | 10.521520 | 10.244989 | 27.158068 |
| C | 9.481807  | 9.170210  | 27.284555 |
| C | 16.745443 | 13.719011 | 30.304657 |
| C | 17.770357 | 13.952378 | 31.374717 |
| O | 15.540173 | 13.610945 | 30.667266 |
| C | 10.415777 | 13.285842 | 30.195700 |
| C | 9.356770  | 13.061770 | 31.234086 |
| O | 11.610687 | 13.380602 | 30.598963 |
| H | 9.573830  | 18.562378 | 27.094796 |
| H | 9.174990  | 17.745232 | 25.578942 |
| H | 8.331488  | 17.254928 | 27.055153 |
| H | 9.212875  | 9.072361  | 28.345779 |
| H | 8.566585  | 9.436613  | 26.744581 |
| H | 9.861889  | 8.199680  | 26.949260 |
| H | 18.854457 | 9.621392  | 27.555534 |
| H | 17.698607 | 8.390996  | 26.946377 |
| H | 18.510931 | 9.535783  | 25.838443 |
| C | 17.723256 | 17.850162 | 27.449994 |
| H | 17.385474 | 18.804640 | 27.032870 |
| H | 17.850497 | 17.989670 | 28.532793 |
| H | 18.698806 | 17.567743 | 27.040369 |
| H | 13.778049 | 9.582895  | 32.267203 |
| H | 12.324291 | 9.052689  | 31.409654 |
| H | 13.872659 | 8.305005  | 30.997341 |
| H | 14.833417 | 17.913907 | 31.444196 |
| H | 13.322983 | 18.692108 | 30.952550 |
| H | 13.329355 | 17.421232 | 32.232877 |
| H | 13.750046 | 17.379617 | 21.845898 |
| H | 12.215872 | 17.795656 | 22.621557 |
| H | 13.678288 | 18.658423 | 23.116394 |
| H | 9.785417  | 13.233494 | 21.837473 |
| H | 8.500089  | 13.137436 | 23.097906 |
| H | 9.203653  | 14.694303 | 22.644784 |
| H | 18.747859 | 13.554831 | 31.082043 |
| H | 17.884942 | 15.036965 | 31.511279 |
| H | 17.448619 | 13.532733 | 32.333630 |
| H | 9.644966  | 13.496852 | 32.196850 |
| H | 8.387259  | 13.449726 | 30.904457 |
| H | 9.244974  | 11.978624 | 31.383707 |
| C | 18.005287 | 13.283869 | 22.939894 |

|    |           |           |           |
|----|-----------|-----------|-----------|
| H  | 18.737633 | 14.092701 | 23.058816 |
| H  | 18.550214 | 12.348767 | 23.128188 |
| H  | 17.617712 | 13.280787 | 21.916295 |
| O  | 13.646424 | 9.575728  | 25.411510 |
| H  | 12.827568 | 9.071751  | 25.476185 |
| H  | 12.826173 | 11.837073 | 22.667813 |
| Ir | 14.231394 | 9.641045  | 23.279459 |
| C  | 15.897953 | 10.454241 | 22.350313 |
| C  | 14.750932 | 7.685047  | 23.604573 |
| H  | 12.680196 | 9.473955  | 22.876728 |
| C  | 16.392263 | 10.204729 | 23.700954 |
| H  | 16.376109 | 9.883104  | 21.546031 |
| H  | 15.642260 | 11.482381 | 22.077118 |
| C  | 15.957113 | 8.323674  | 24.127037 |
| H  | 14.089856 | 7.231143  | 24.353474 |
| H  | 14.877335 | 7.044502  | 22.724387 |
| H  | 17.437052 | 9.902979  | 23.799908 |
| H  | 16.149526 | 10.963464 | 24.460116 |
| H  | 16.034820 | 8.403293  | 25.215565 |
| H  | 16.883622 | 7.993132  | 23.649715 |
| H  | 14.134868 | 9.338869  | 21.740694 |

**Ir(C<sub>4</sub>H<sub>8</sub>) H<sub>2</sub>@UiO-66 site-1**

Electronic Energy: -3813.963029

Enthalpy: -3813.200047

Free Energy: -3813.342317

|    |           |           |           |
|----|-----------|-----------|-----------|
| O  | 13.635518 | 11.687321 | 23.255522 |
| Zr | 13.673069 | 13.490152 | 24.548819 |
| C  | 10.482506 | 13.517317 | 23.859331 |
| C  | 9.430581  | 13.629344 | 22.794916 |
| O  | 10.089262 | 13.420272 | 25.055745 |
| O  | 11.684955 | 13.565578 | 23.485771 |
| O  | 15.715282 | 13.468540 | 23.542792 |
| O  | 13.616216 | 15.442112 | 23.474916 |
| Zr | 13.716248 | 10.965271 | 27.088062 |
| Zr | 11.117905 | 13.402779 | 27.017069 |
| O  | 15.035665 | 14.926813 | 25.670603 |
| O  | 12.332518 | 12.000168 | 25.603412 |
| O  | 12.578126 | 14.489687 | 26.000893 |
| O  | 14.783386 | 12.407124 | 25.969367 |
| C  | 13.495725 | 16.642244 | 23.854588 |
| C  | 13.295702 | 17.684195 | 22.794433 |
| O  | 13.506065 | 17.029644 | 25.056294 |
| C  | 16.909502 | 13.435107 | 23.954625 |
| O  | 17.264206 | 13.527704 | 25.164303 |
| Zr | 13.557788 | 15.999519 | 27.052081 |
| Zr | 16.153817 | 13.558492 | 27.100139 |
| H  | 11.935994 | 11.368704 | 24.993247 |
| H  | 15.588214 | 15.485200 | 25.118124 |
| H  | 11.577884 | 15.406921 | 28.989784 |

|    |           |           |           |
|----|-----------|-----------|-----------|
| O  | 12.158531 | 14.866996 | 28.447991 |
| O  | 15.496953 | 17.115874 | 27.135587 |
| O  | 11.559244 | 16.991261 | 26.953679 |
| O  | 13.557906 | 17.062112 | 29.023865 |
| Zr | 13.590080 | 13.496343 | 29.573582 |
| O  | 14.627099 | 14.557966 | 28.108717 |
| H  | 15.645056 | 11.590570 | 29.047933 |
| O  | 15.074384 | 12.129262 | 28.494368 |
| O  | 11.727098 | 9.891935  | 27.214875 |
| O  | 15.768848 | 9.983608  | 27.068346 |
| O  | 13.694099 | 9.913631  | 29.048561 |
| O  | 12.604724 | 12.426321 | 28.086798 |
| O  | 17.156000 | 13.667518 | 29.110035 |
| O  | 17.131498 | 15.577909 | 27.181930 |
| O  | 17.287638 | 11.638149 | 27.067076 |
| O  | 10.045172 | 13.333337 | 28.989350 |
| O  | 10.110241 | 11.436598 | 27.044255 |
| O  | 10.014600 | 15.361618 | 26.944911 |
| C  | 10.368272 | 16.571715 | 26.878764 |
| C  | 9.294553  | 17.596241 | 26.661342 |
| C  | 13.610976 | 16.682521 | 30.228016 |
| C  | 13.760335 | 17.742681 | 31.278868 |
| O  | 13.579964 | 15.480970 | 30.616975 |
| C  | 16.948933 | 10.421798 | 26.991354 |
| C  | 18.055094 | 9.419853  | 26.831469 |
| C  | 13.577513 | 10.302571 | 30.245659 |
| C  | 13.400271 | 9.246691  | 31.295983 |
| O  | 13.574577 | 11.507781 | 30.622242 |
| C  | 16.707724 | 16.767975 | 27.232066 |
| C  | 10.521538 | 10.244951 | 27.158088 |
| C  | 9.481796  | 9.170215  | 27.284511 |
| C  | 16.745462 | 13.719060 | 30.304631 |
| C  | 17.770348 | 13.952376 | 31.374726 |
| O  | 15.539611 | 13.612775 | 30.666766 |
| C  | 10.415742 | 13.285873 | 30.195697 |
| C  | 9.356776  | 13.061768 | 31.234092 |
| O  | 11.610014 | 13.385486 | 30.598685 |
| H  | 9.573725  | 18.562669 | 27.094219 |
| H  | 9.174614  | 17.744479 | 25.578890 |
| H  | 8.331608  | 17.254949 | 27.055434 |
| H  | 9.192016  | 9.091998  | 28.341796 |
| H  | 8.577397  | 9.423448  | 26.720448 |
| H  | 9.873310  | 8.196581  | 26.972551 |
| H  | 18.732407 | 9.480159  | 27.693471 |
| H  | 17.670703 | 8.399456  | 26.739167 |
| H  | 18.659148 | 9.672390  | 25.950012 |
| C  | 17.723254 | 17.850164 | 27.449996 |
| H  | 17.385673 | 18.804268 | 27.031907 |
| H  | 17.849792 | 17.990561 | 28.532760 |
| H  | 18.698912 | 17.567228 | 27.041076 |
| H  | 13.736697 | 9.597813  | 32.276893 |
| H  | 12.328275 | 9.016844  | 31.373939 |
| H  | 13.911680 | 8.319480  | 31.016271 |



|    |           |           |           |
|----|-----------|-----------|-----------|
| H  | 14.833438 | 17.915364 | 31.442272 |
| H  | 13.321174 | 18.691559 | 30.953409 |
| H  | 13.331372 | 17.420369 | 32.233480 |
| H  | 13.752115 | 17.381267 | 21.846264 |
| H  | 12.215978 | 17.793550 | 22.620303 |
| H  | 13.676272 | 18.658680 | 23.117776 |
| H  | 9.797866  | 13.263582 | 21.830442 |
| H  | 8.512920  | 13.106102 | 23.084476 |
| H  | 9.175619  | 14.691316 | 22.671415 |
| H  | 18.747519 | 13.553629 | 31.082600 |
| H  | 17.885874 | 15.036977 | 31.510327 |
| H  | 17.447925 | 13.533777 | 32.333850 |
| H  | 9.645534  | 13.494874 | 32.197545 |
| H  | 8.387706  | 13.451265 | 30.904992 |
| H  | 9.243461  | 11.978455 | 31.381388 |
| C  | 18.005282 | 13.283712 | 22.939911 |
| H  | 18.848199 | 13.938684 | 23.189965 |
| H  | 18.383201 | 12.252502 | 22.983911 |
| H  | 17.652875 | 13.479496 | 21.922401 |
| O  | 13.691922 | 9.718742  | 25.342419 |
| H  | 13.771641 | 8.775845  | 25.517959 |
| H  | 13.574499 | 11.873130 | 22.311246 |
| Ir | 15.103303 | 10.236891 | 23.700853 |
| C  | 15.979390 | 10.769028 | 21.854609 |
| C  | 14.293036 | 8.714065  | 22.575522 |
| C  | 15.262722 | 9.994023  | 20.755023 |
| H  | 15.874735 | 11.858086 | 21.726618 |
| H  | 17.058688 | 10.550615 | 21.807360 |
| C  | 15.017811 | 8.586734  | 21.257858 |
| H  | 14.241437 | 7.774575  | 23.147562 |
| H  | 13.261005 | 9.085737  | 22.434486 |
| H  | 14.284499 | 10.459432 | 20.528735 |
| H  | 15.825091 | 10.009957 | 19.805423 |
| H  | 15.981590 | 8.068021  | 21.404244 |
| H  | 14.440298 | 7.969807  | 20.546249 |
| H  | 15.890651 | 8.967358  | 24.246453 |
| H  | 16.634896 | 9.912361  | 23.818451 |

### TS2@UiO-66 site-1

Electronic Energy: -3813.942748

Enthalpy: -3813.178835

Free Energy: -3813.322311

|    |           |           |           |
|----|-----------|-----------|-----------|
| O  | 13.770206 | 11.717955 | 23.299281 |
| Zr | 13.687277 | 13.489384 | 24.522002 |
| C  | 10.482600 | 13.517226 | 23.859328 |
| C  | 9.430578  | 13.629355 | 22.794919 |
| O  | 10.098782 | 13.363649 | 25.058482 |
| O  | 11.682058 | 13.597900 | 23.489805 |
| O  | 15.720769 | 13.449671 | 23.525467 |
| O  | 13.634047 | 15.446139 | 23.470342 |

|    |           |           |           |
|----|-----------|-----------|-----------|
| Zr | 13.721672 | 10.930705 | 27.079765 |
| Zr | 11.129861 | 13.430725 | 27.043807 |
| O  | 15.034690 | 14.933315 | 25.661344 |
| O  | 12.302598 | 11.916184 | 25.519297 |
| O  | 12.570340 | 14.483266 | 26.002209 |
| O  | 14.695604 | 12.472100 | 26.042107 |
| C  | 13.495702 | 16.642275 | 23.854484 |
| C  | 13.295595 | 17.684231 | 22.794488 |
| O  | 13.493039 | 17.027064 | 25.057192 |
| C  | 16.909582 | 13.435097 | 23.954503 |
| O  | 17.251008 | 13.526338 | 25.165536 |
| Zr | 13.557780 | 15.996259 | 27.049231 |
| Zr | 16.133272 | 13.559817 | 27.104406 |
| H  | 11.416106 | 11.631936 | 25.247280 |
| H  | 15.588983 | 15.511492 | 25.131350 |
| H  | 11.586103 | 15.419239 | 29.005896 |
| O  | 12.156334 | 14.875004 | 28.457576 |
| O  | 15.496753 | 17.117189 | 27.130791 |
| O  | 11.558153 | 16.988867 | 26.957102 |
| O  | 13.556836 | 17.062740 | 29.023590 |
| Zr | 13.590318 | 13.490237 | 29.568714 |
| O  | 14.624912 | 14.568994 | 28.121654 |
| H  | 15.640173 | 11.599010 | 29.077496 |
| O  | 15.070877 | 12.113367 | 28.499743 |
| O  | 11.725606 | 9.891778  | 27.215213 |
| O  | 15.769136 | 9.976441  | 27.029051 |
| O  | 13.700379 | 9.908074  | 29.051448 |
| O  | 12.594477 | 12.421535 | 28.079262 |
| O  | 17.152483 | 13.666367 | 29.109353 |
| O  | 17.127917 | 15.577150 | 27.183263 |
| O  | 17.276074 | 11.638604 | 27.065346 |
| O  | 10.041616 | 13.338904 | 28.989787 |
| O  | 10.115847 | 11.438054 | 27.010775 |
| O  | 10.012056 | 15.361240 | 26.944430 |
| C  | 10.368338 | 16.571660 | 26.878783 |
| C  | 9.294553  | 17.596241 | 26.661343 |
| C  | 13.610984 | 16.682462 | 30.228036 |
| C  | 13.760369 | 17.742684 | 31.278860 |
| O  | 13.578349 | 15.480580 | 30.617167 |
| C  | 16.948905 | 10.421831 | 26.991233 |
| C  | 18.055078 | 9.419810  | 26.831629 |
| C  | 13.577415 | 10.302575 | 30.245749 |
| C  | 13.400196 | 9.246723  | 31.296001 |
| O  | 13.567866 | 11.508368 | 30.620360 |
| C  | 16.707774 | 16.767973 | 27.232036 |
| C  | 10.521520 | 10.244989 | 27.158068 |
| C  | 9.481807  | 9.170210  | 27.284555 |
| C  | 16.745443 | 13.719011 | 30.304657 |
| C  | 17.770357 | 13.952378 | 31.374717 |
| O  | 15.539365 | 13.608211 | 30.667517 |
| C  | 10.415777 | 13.285842 | 30.195700 |
| C  | 9.356770  | 13.061770 | 31.234086 |
| O  | 11.609468 | 13.383460 | 30.595952 |

|    |           |           |           |
|----|-----------|-----------|-----------|
| H  | 8.336073  | 17.262324 | 27.072409 |
| H  | 9.581754  | 18.567528 | 27.077357 |
| H  | 9.159698  | 17.728483 | 25.578554 |
| H  | 8.635411  | 9.364386  | 26.615317 |
| H  | 9.907755  | 8.180072  | 27.094322 |
| H  | 9.084358  | 9.183968  | 28.309230 |
| H  | 18.951839 | 9.735206  | 27.376334 |
| H  | 17.740644 | 8.420499  | 27.149280 |
| H  | 18.330838 | 9.368048  | 25.768704 |
| C  | 17.723256 | 17.850162 | 27.449994 |
| H  | 17.389969 | 18.801435 | 27.022098 |
| H  | 17.841239 | 17.999213 | 28.532563 |
| H  | 18.701623 | 17.562992 | 27.050671 |
| H  | 13.698701 | 9.609366  | 32.284909 |
| H  | 12.333922 | 8.984247  | 31.342241 |
| H  | 13.945205 | 8.333612  | 31.033500 |
| H  | 14.833373 | 17.916992 | 31.441243 |
| H  | 13.319699 | 18.691063 | 30.953923 |
| H  | 13.332805 | 17.419806 | 32.233910 |
| H  | 13.657297 | 18.663400 | 23.125336 |
| H  | 13.769859 | 17.389649 | 21.852509 |
| H  | 12.217213 | 17.778300 | 22.603934 |
| H  | 9.425627  | 14.656694 | 22.406629 |
| H  | 9.681698  | 12.976411 | 21.949786 |
| H  | 8.434247  | 13.389608 | 23.179002 |
| H  | 18.749357 | 13.560819 | 31.079132 |
| H  | 17.879578 | 15.036720 | 31.517399 |
| H  | 17.451111 | 13.525960 | 32.331441 |
| H  | 8.390223  | 13.461041 | 30.909332 |
| H  | 9.235107  | 11.978259 | 31.373324 |
| H  | 9.650595  | 13.485466 | 32.200095 |
| C  | 18.005287 | 13.283869 | 22.939894 |
| H  | 18.892447 | 13.855573 | 23.234000 |
| H  | 18.306175 | 12.227201 | 22.903759 |
| H  | 17.671050 | 13.576644 | 21.939417 |
| O  | 13.784533 | 9.662904  | 25.384609 |
| H  | 14.628571 | 9.245821  | 25.189666 |
| H  | 14.469391 | 11.609002 | 22.649026 |
| Ir | 12.399885 | 10.170243 | 23.703497 |
| C  | 12.907174 | 8.826757  | 22.231427 |
| H  | 11.800738 | 8.916963  | 24.418664 |
| H  | 11.555570 | 10.820181 | 22.547119 |
| C  | 11.789029 | 7.813856  | 22.023537 |
| H  | 13.100067 | 9.395184  | 21.303750 |
| H  | 13.855233 | 8.337590  | 22.520782 |
| C  | 10.433132 | 9.240349  | 23.510718 |
| H  | 11.877591 | 7.301174  | 21.050117 |
| H  | 11.858590 | 7.022500  | 22.791070 |
| C  | 10.454153 | 8.521427  | 22.169497 |
| H  | 10.101186 | 8.541787  | 24.299180 |
| H  | 9.716886  | 10.076422 | 23.553601 |
| H  | 9.606433  | 7.820650  | 22.080184 |
| H  | 10.344839 | 9.256333  | 21.353575 |

**Ir(butane) H@UiO-66 site-1**

Electronic Energy: -3813.974263

Enthalpy: -3813.206749

Free Energy: -3813.348799

|    |           |           |           |
|----|-----------|-----------|-----------|
| O  | 13.732868 | 12.109528 | 22.773527 |
| Zr | 13.680070 | 13.506141 | 24.471547 |
| C  | 10.482523 | 13.517784 | 23.858835 |
| C  | 9.430490  | 13.629310 | 22.795002 |
| O  | 10.107326 | 13.333998 | 25.056363 |
| O  | 11.674418 | 13.632132 | 23.489212 |
| O  | 15.732198 | 13.501217 | 23.513716 |
| O  | 13.646191 | 15.455211 | 23.453847 |
| Zr | 13.713693 | 10.896355 | 27.103899 |
| Zr | 11.121308 | 13.418118 | 27.027544 |
| O  | 15.024064 | 14.910859 | 25.657962 |
| O  | 12.368863 | 11.830260 | 25.436870 |
| O  | 12.560893 | 14.465224 | 25.992722 |
| O  | 14.717885 | 12.384365 | 25.956318 |
| C  | 13.495782 | 16.642517 | 23.854139 |
| C  | 13.295618 | 17.684294 | 22.794546 |
| O  | 13.486478 | 17.014834 | 25.060053 |
| C  | 16.909418 | 13.435235 | 23.954435 |
| O  | 17.242025 | 13.504741 | 25.170474 |
| Zr | 13.550245 | 15.985873 | 27.043095 |
| Zr | 16.133240 | 13.547625 | 27.090768 |
| H  | 11.554407 | 11.457154 | 25.077452 |
| H  | 15.587787 | 15.477898 | 25.125170 |
| H  | 11.585975 | 15.411695 | 28.998294 |
| O  | 12.156097 | 14.866825 | 28.450297 |
| O  | 15.494842 | 17.111432 | 27.129242 |
| O  | 11.558796 | 16.986843 | 26.959025 |
| O  | 13.558113 | 17.058203 | 29.021721 |
| Zr | 13.583637 | 13.487738 | 29.562886 |
| O  | 14.617750 | 14.546291 | 28.100236 |
| H  | 15.638538 | 11.591134 | 29.044077 |
| O  | 15.060357 | 12.111747 | 28.480298 |
| O  | 11.718712 | 9.890346  | 27.264783 |
| O  | 15.778426 | 9.966371  | 27.076197 |
| O  | 13.719586 | 9.894705  | 29.059796 |
| O  | 12.587905 | 12.411361 | 28.064434 |
| O  | 17.149387 | 13.662658 | 29.106647 |
| O  | 17.125337 | 15.574133 | 27.178959 |
| O  | 17.267017 | 11.642079 | 27.049455 |
| O  | 10.043436 | 13.330743 | 28.988071 |
| O  | 10.130615 | 11.436787 | 26.969920 |
| O  | 10.012247 | 15.360101 | 26.939506 |
| C  | 10.368268 | 16.571777 | 26.878667 |
| C  | 9.294548  | 17.596240 | 26.661365 |

|   |           |           |           |
|---|-----------|-----------|-----------|
| C | 13.610926 | 16.682377 | 30.227973 |
| C | 13.760393 | 17.742683 | 31.278857 |
| O | 13.580214 | 15.478628 | 30.614371 |
| C | 16.948959 | 10.421519 | 26.991454 |
| C | 18.055153 | 9.419891  | 26.831644 |
| C | 13.577681 | 10.302249 | 30.246017 |
| C | 13.400169 | 9.246773  | 31.296047 |
| O | 13.557765 | 11.510438 | 30.609421 |
| C | 16.707610 | 16.767921 | 27.232087 |
| C | 10.521701 | 10.244740 | 27.158470 |
| C | 9.481787  | 9.170225  | 27.284525 |
| C | 16.745379 | 13.718948 | 30.304695 |
| C | 17.770372 | 13.952369 | 31.374705 |
| O | 15.537551 | 13.606292 | 30.663159 |
| C | 10.415790 | 13.285800 | 30.195654 |
| C | 9.356761  | 13.061774 | 31.234078 |
| O | 11.609971 | 13.387668 | 30.594689 |
| H | 9.579750  | 18.566540 | 27.081057 |
| H | 9.163647  | 17.731618 | 25.578471 |
| H | 8.335163  | 17.260183 | 27.068318 |
| H | 9.448440  | 8.832661  | 28.329297 |
| H | 8.487360  | 9.526118  | 26.997320 |
| H | 9.766759  | 8.298286  | 26.683105 |
| H | 19.025409 | 9.841802  | 27.111909 |
| H | 17.844910 | 8.512899  | 27.409258 |
| H | 18.106591 | 9.123475  | 25.773904 |
| C | 17.723270 | 17.850154 | 27.449965 |
| H | 17.387001 | 18.801987 | 27.025891 |
| H | 17.846015 | 17.995831 | 28.532413 |
| H | 18.699736 | 17.564289 | 27.045270 |
| H | 13.627157 | 9.627338  | 32.297003 |
| H | 12.349795 | 8.923637  | 31.284178 |
| H | 14.006814 | 8.363783  | 31.067524 |
| H | 14.833476 | 17.914099 | 31.443380 |
| H | 13.322449 | 18.691772 | 30.952523 |
| H | 13.329963 | 17.420711 | 32.232885 |
| H | 13.888208 | 17.452699 | 21.902890 |
| H | 12.239861 | 17.666278 | 22.489690 |
| H | 13.524327 | 18.688695 | 23.164881 |
| H | 9.714226  | 13.031337 | 21.920375 |
| H | 8.443368  | 13.329817 | 23.161082 |
| H | 9.380051  | 14.673566 | 22.457896 |
| H | 18.748449 | 13.558608 | 31.079267 |
| H | 17.881417 | 15.036616 | 31.516347 |
| H | 17.449648 | 13.527019 | 32.331325 |
| H | 9.651396  | 13.482530 | 32.201067 |
| H | 8.391088  | 13.463557 | 30.909943 |
| H | 9.232878  | 11.978070 | 31.369547 |
| C | 18.005285 | 13.283790 | 22.939904 |
| H | 18.977481 | 13.575720 | 23.349195 |
| H | 18.064133 | 12.225767 | 22.645950 |
| H | 17.777989 | 13.856318 | 22.033772 |
| O | 13.767316 | 9.186899  | 25.721812 |

|    |           |           |           |
|----|-----------|-----------|-----------|
| H  | 14.592160 | 8.699156  | 25.833589 |
| H  | 14.551033 | 12.227610 | 22.276151 |
| Ir | 13.972899 | 10.621271 | 24.218137 |
| C  | 12.740877 | 9.459318  | 23.081016 |
| C  | 11.285690 | 9.749605  | 23.384643 |
| H  | 12.980229 | 8.403957  | 23.291980 |
| H  | 12.966003 | 9.663041  | 22.021107 |
| C  | 10.293471 | 8.922765  | 22.575142 |
| H  | 11.090466 | 9.567345  | 24.459870 |
| C  | 8.850041  | 9.243525  | 22.904808 |
| H  | 10.481902 | 9.084452  | 21.499861 |
| H  | 10.492689 | 7.850901  | 22.746337 |
| H  | 8.143790  | 8.641652  | 22.316071 |
| H  | 8.628268  | 9.060332  | 23.967354 |
| H  | 8.617460  | 10.301883 | 22.711052 |
| H  | 15.200354 | 9.927273  | 23.514589 |
| H  | 11.076903 | 10.821096 | 23.195682 |

### TS3@UiO-66 site-1

Electronic Energy: -3813.969741

Enthalpy: -3813.207279

Free Energy: -3813.350877

|    |           |           |           |
|----|-----------|-----------|-----------|
| O  | 13.672351 | 11.748819 | 23.134707 |
| Zr | 13.693543 | 13.492320 | 24.561641 |
| C  | 10.482600 | 13.517226 | 23.859328 |
| C  | 9.430578  | 13.629355 | 22.794919 |
| O  | 10.094376 | 13.408937 | 25.057042 |
| O  | 11.685169 | 13.562579 | 23.484058 |
| O  | 15.718625 | 13.470193 | 23.536091 |
| O  | 13.621392 | 15.442081 | 23.476514 |
| Zr | 13.718659 | 10.947038 | 27.070088 |
| Zr | 11.125986 | 13.405603 | 27.020003 |
| O  | 15.041538 | 14.941856 | 25.669397 |
| O  | 12.334088 | 11.982096 | 25.581344 |
| O  | 12.579323 | 14.494023 | 25.996619 |
| O  | 14.742915 | 12.464437 | 26.021550 |
| C  | 13.495702 | 16.642275 | 23.854484 |
| C  | 13.295595 | 17.684231 | 22.794488 |
| O  | 13.502714 | 17.031941 | 25.055673 |
| C  | 16.909582 | 13.435097 | 23.954503 |
| O  | 17.259197 | 13.518957 | 25.166838 |
| Zr | 13.558398 | 16.002500 | 27.053785 |
| Zr | 16.149945 | 13.564762 | 27.106559 |
| H  | 11.804660 | 11.414526 | 25.009398 |
| H  | 15.590041 | 15.509498 | 25.122515 |
| H  | 11.578449 | 15.405806 | 28.991019 |
| O  | 12.158318 | 14.867340 | 28.447022 |
| O  | 15.497431 | 17.117931 | 27.136785 |
| O  | 11.558783 | 16.992108 | 26.955600 |
| O  | 13.555752 | 17.064441 | 29.024121 |

|    |           |           |           |
|----|-----------|-----------|-----------|
| Zr | 13.588996 | 13.490789 | 29.566156 |
| O  | 14.628416 | 14.567467 | 28.116708 |
| H  | 15.638861 | 11.595692 | 29.070248 |
| O  | 15.073630 | 12.117243 | 28.495137 |
| O  | 11.726932 | 9.893149  | 27.201736 |
| O  | 15.767047 | 9.977245  | 27.017643 |
| O  | 13.695715 | 9.910770  | 29.049742 |
| O  | 12.601925 | 12.422342 | 28.079162 |
| O  | 17.156875 | 13.667971 | 29.110512 |
| O  | 17.132283 | 15.578920 | 27.182981 |
| O  | 17.280580 | 11.635048 | 27.081186 |
| O  | 10.044830 | 13.331820 | 28.988868 |
| O  | 10.107631 | 11.434752 | 27.032435 |
| O  | 10.015488 | 15.361234 | 26.943049 |
| C  | 10.368338 | 16.571660 | 26.878783 |
| C  | 9.294553  | 17.596241 | 26.661343 |
| C  | 13.610984 | 16.682462 | 30.228036 |
| C  | 13.760369 | 17.742684 | 31.278860 |
| O  | 13.579301 | 15.480754 | 30.615377 |
| C  | 16.948905 | 10.421831 | 26.991233 |
| C  | 18.055078 | 9.419810  | 26.831629 |
| C  | 13.577415 | 10.302575 | 30.245749 |
| C  | 13.400196 | 9.246723  | 31.296001 |
| O  | 13.571563 | 11.508254 | 30.622017 |
| C  | 16.707774 | 16.767973 | 27.232036 |
| C  | 10.521520 | 10.244989 | 27.158068 |
| C  | 9.481807  | 9.170210  | 27.284555 |
| C  | 16.745443 | 13.719011 | 30.304657 |
| C  | 17.770357 | 13.952378 | 31.374717 |
| O  | 15.539751 | 13.608957 | 30.665504 |
| C  | 10.415777 | 13.285842 | 30.195700 |
| C  | 9.356770  | 13.061770 | 31.234086 |
| O  | 11.609848 | 13.386216 | 30.597636 |
| H  | 9.577726  | 18.565401 | 27.085247 |
| H  | 9.166655  | 17.735529 | 25.578592 |
| H  | 8.333893  | 17.258827 | 27.064455 |
| H  | 9.006655  | 9.251321  | 28.272045 |
| H  | 8.684935  | 9.315088  | 26.544609 |
| H  | 9.918961  | 8.171544  | 27.185876 |
| H  | 18.948209 | 9.731073  | 27.384511 |
| H  | 17.738971 | 8.418102  | 27.140383 |
| H  | 18.337425 | 9.375698  | 25.770073 |
| C  | 17.723256 | 17.850162 | 27.449994 |
| H  | 17.387141 | 18.803800 | 27.029572 |
| H  | 17.847129 | 17.992639 | 28.532810 |
| H  | 18.699893 | 17.566380 | 27.043940 |
| H  | 13.712977 | 9.604841  | 32.282217 |
| H  | 12.331543 | 8.996481  | 31.354094 |
| H  | 13.932734 | 8.328129  | 31.027090 |
| H  | 14.833262 | 17.922861 | 31.435528 |
| H  | 13.313101 | 18.688890 | 30.956525 |
| H  | 13.339189 | 17.417273 | 32.235877 |
| H  | 13.734764 | 17.374184 | 21.840535 |

|    |           |           |           |
|----|-----------|-----------|-----------|
| H  | 12.215370 | 17.811089 | 22.636299 |
| H  | 13.694738 | 18.653478 | 23.111482 |
| H  | 9.400727  | 14.667535 | 22.436775 |
| H  | 9.690464  | 13.005923 | 21.930743 |
| H  | 8.439203  | 13.362466 | 23.173910 |
| H  | 18.746422 | 13.550073 | 31.083695 |
| H  | 17.889382 | 15.036933 | 31.507689 |
| H  | 17.446625 | 13.536856 | 32.334732 |
| H  | 9.647917  | 13.489683 | 32.199115 |
| H  | 8.389016  | 13.456560 | 30.907298 |
| H  | 9.239118  | 11.978227 | 31.376515 |
| C  | 18.005287 | 13.283869 | 22.939894 |
| H  | 18.887935 | 13.864297 | 23.230520 |
| H  | 18.311820 | 12.228827 | 22.910738 |
| H  | 17.667793 | 13.566411 | 21.937655 |
| O  | 13.772182 | 9.679809  | 25.358851 |
| H  | 14.613464 | 9.209474  | 25.362928 |
| H  | 13.534206 | 12.081193 | 22.238832 |
| Ir | 13.066089 | 9.831720  | 23.220305 |
| C  | 12.172086 | 7.840077  | 23.407025 |
| C  | 11.317514 | 8.941044  | 23.790432 |
| H  | 10.448767 | 9.167096  | 23.158212 |
| H  | 11.140578 | 9.084046  | 24.863461 |
| H  | 12.580041 | 9.926257  | 21.713249 |
| H  | 13.477203 | 8.279967  | 23.032086 |
| C  | 11.829683 | 7.002886  | 22.192728 |
| C  | 12.999516 | 6.239452  | 21.609206 |
| H  | 11.381246 | 7.656506  | 21.428026 |
| H  | 11.032591 | 6.301059  | 22.493457 |
| H  | 12.695703 | 5.608050  | 20.764020 |
| H  | 13.777427 | 6.925440  | 21.240193 |
| H  | 13.469145 | 5.581613  | 22.356124 |
| H  | 12.562573 | 7.248937  | 24.250926 |

**Ir(1-butene) H<sub>2</sub>@UiO-66 site-1**

Electronic Energy: -3813.992682

Enthalpy: -3813.230200

Free Energy: -3813.373302

|    |           |           |           |
|----|-----------|-----------|-----------|
| Zr | 13.694760 | 13.485742 | 24.545581 |
| C  | 10.482553 | 13.517258 | 23.859301 |
| C  | 9.430581  | 13.629370 | 22.794918 |
| O  | 10.090094 | 13.408740 | 25.057331 |
| O  | 11.685325 | 13.557498 | 23.487941 |
| O  | 15.723906 | 13.495045 | 23.524967 |
| O  | 13.619651 | 15.442717 | 23.475358 |
| Zr | 13.715783 | 10.958147 | 27.079837 |
| Zr | 11.128093 | 13.413920 | 27.019608 |
| O  | 15.040665 | 14.938107 | 25.668707 |
| O  | 12.327294 | 11.976951 | 25.577852 |
| O  | 12.577398 | 14.491948 | 26.000127 |



|    |           |           |           |
|----|-----------|-----------|-----------|
| O  | 14.729958 | 12.470912 | 26.040803 |
| C  | 13.495758 | 16.642280 | 23.854517 |
| C  | 13.295633 | 17.684230 | 22.794480 |
| O  | 13.503814 | 17.031627 | 25.056045 |
| C  | 16.909567 | 13.435046 | 23.954586 |
| O  | 17.252660 | 13.499629 | 25.168752 |
| Zr | 13.557434 | 15.998738 | 27.051005 |
| Zr | 16.145971 | 13.564856 | 27.110095 |
| H  | 11.723384 | 11.454504 | 25.032592 |
| H  | 15.588759 | 15.510126 | 25.125952 |
| H  | 11.578685 | 15.406555 | 28.994200 |
| O  | 12.158221 | 14.867653 | 28.450300 |
| O  | 15.497370 | 17.116870 | 27.136759 |
| O  | 11.558735 | 16.991202 | 26.954874 |
| O  | 13.555390 | 17.062914 | 29.024235 |
| Zr | 13.589194 | 13.493837 | 29.571578 |
| O  | 14.628135 | 14.568114 | 28.122229 |
| H  | 15.637782 | 11.595607 | 29.080151 |
| O  | 15.073135 | 12.115246 | 28.502770 |
| O  | 11.726196 | 9.884741  | 27.195371 |
| O  | 15.763232 | 9.980713  | 26.997686 |
| O  | 13.695818 | 9.912394  | 29.048638 |
| O  | 12.601644 | 12.419220 | 28.085106 |
| O  | 17.155922 | 13.668620 | 29.110715 |
| O  | 17.132324 | 15.578489 | 27.181514 |
| O  | 17.280650 | 11.633047 | 27.095626 |
| O  | 10.045633 | 13.333751 | 28.989131 |
| O  | 10.115488 | 11.436905 | 27.036841 |
| O  | 10.014096 | 15.361702 | 26.945371 |
| C  | 10.368303 | 16.571676 | 26.878770 |
| C  | 9.294553  | 17.596241 | 26.661342 |
| C  | 13.610959 | 16.682476 | 30.228021 |
| C  | 13.760368 | 17.742683 | 31.278861 |
| O  | 13.579081 | 15.480879 | 30.617544 |
| C  | 16.948915 | 10.421845 | 26.991192 |
| C  | 18.055083 | 9.419817  | 26.831620 |
| C  | 13.577493 | 10.302571 | 30.245724 |
| C  | 13.400227 | 9.246722  | 31.296006 |
| O  | 13.571184 | 11.507137 | 30.623937 |
| C  | 16.707740 | 16.767969 | 27.232044 |
| C  | 10.521488 | 10.244961 | 27.158075 |
| C  | 9.481808  | 9.170211  | 27.284577 |
| C  | 16.745435 | 13.719020 | 30.304640 |
| C  | 17.770356 | 13.952379 | 31.374718 |
| O  | 15.539995 | 13.608641 | 30.667237 |
| C  | 10.415755 | 13.285840 | 30.195698 |
| C  | 9.356774  | 13.061769 | 31.234090 |
| O  | 11.609945 | 13.385436 | 30.598743 |
| H  | 9.575560  | 18.563722 | 27.090577 |
| H  | 9.171346  | 17.740951 | 25.578757 |
| H  | 8.332524  | 17.256603 | 27.059153 |
| H  | 9.463514  | 8.822337  | 28.327057 |
| H  | 8.482968  | 9.536189  | 27.025571 |

|    |           |           |           |
|----|-----------|-----------|-----------|
| H  | 9.742101  | 8.297520  | 26.672496 |
| H  | 18.939768 | 9.720144  | 27.403784 |
| H  | 17.733090 | 8.413401  | 27.118108 |
| H  | 18.354193 | 9.394541  | 25.774099 |
| C  | 17.723256 | 17.850162 | 27.449995 |
| H  | 17.386422 | 18.804028 | 27.030695 |
| H  | 17.848392 | 17.991764 | 28.532779 |
| H  | 18.699507 | 17.566927 | 27.042626 |
| H  | 13.776934 | 9.583530  | 32.267519 |
| H  | 12.324340 | 9.052649  | 31.409451 |
| H  | 13.873321 | 8.305107  | 30.998263 |
| H  | 14.833348 | 17.916795 | 31.441699 |
| H  | 13.319897 | 18.691099 | 30.953767 |
| H  | 13.332354 | 17.419948 | 32.233778 |
| H  | 13.742458 | 17.377262 | 21.843070 |
| H  | 12.215586 | 17.803287 | 22.629007 |
| H  | 13.686427 | 18.655971 | 23.114168 |
| H  | 9.771706  | 13.178376 | 21.856191 |
| H  | 8.483560  | 13.183964 | 23.118147 |
| H  | 9.248263  | 14.695136 | 22.596519 |
| H  | 18.747542 | 13.553929 | 31.082187 |
| H  | 17.885865 | 15.036925 | 31.510849 |
| H  | 17.448317 | 13.533275 | 32.333742 |
| H  | 9.649760  | 13.485842 | 32.200221 |
| H  | 8.390089  | 13.460572 | 30.908970 |
| H  | 9.235185  | 11.978207 | 31.372778 |
| C  | 18.005281 | 13.283847 | 22.939890 |
| H  | 18.917848 | 13.792934 | 23.268465 |
| H  | 18.249102 | 12.216339 | 22.842801 |
| H  | 17.692199 | 13.646958 | 21.955568 |
| C  | 11.415421 | 8.469651  | 23.986138 |
| C  | 12.531065 | 7.783745  | 23.445018 |
| C  | 10.058140 | 8.528085  | 23.343013 |
| C  | 9.300683  | 9.816426  | 23.606424 |
| H  | 14.595452 | 9.190853  | 25.318270 |
| H  | 14.144198 | 11.927745 | 22.378570 |
| H  | 11.801262 | 10.281597 | 22.336698 |
| H  | 12.924954 | 9.659268  | 21.831088 |
| H  | 11.402899 | 8.577339  | 25.082111 |
| H  | 12.447031 | 7.294681  | 22.468267 |
| H  | 13.250700 | 7.308523  | 24.122321 |
| H  | 9.467553  | 7.671895  | 23.720090 |
| H  | 10.156442 | 8.357315  | 22.257395 |
| H  | 9.807802  | 10.678741 | 23.147772 |
| H  | 8.279799  | 9.785506  | 23.201220 |
| H  | 9.216081  | 10.036085 | 24.681921 |
| Ir | 12.888956 | 9.848702  | 23.385677 |
| O  | 13.759006 | 9.670229  | 25.344619 |
| O  | 13.813371 | 11.722176 | 23.259190 |

**Table S6.** XYZ Cartesian Coordinates of Selected Optimized Al<sub>8</sub>-NU-1000 Isomers at the M06-L Density Functional. See Figure S13 for the optimized geometries. Unscaled Carbonyl Frequencies Computed at the Same Level of Theory Are Also Given.

**Al<sub>8</sub>-NU-1000 (A)**

Electronic Energy: -7260.082323

Enthalpy: -7259.074122

Free Energy: -7259.290807

$\nu_{\text{CO}} = 2073, 2154 \text{ cm}^{-1}$

|   |    |             |             |             |
|---|----|-------------|-------------|-------------|
| C | -1 | 1.68444800  | 3.94340000  | -3.15512100 |
| C | -1 | 0.64900500  | -4.90821400 | 2.22466400  |
| C | -1 | 2.37166400  | 3.70494700  | 2.55373300  |
| C | -1 | 0.00185700  | -4.64437500 | -3.17737100 |
| C | -1 | -5.46152300 | -3.56982200 | 3.03745400  |
| C | -1 | -4.20580500 | 5.17837200  | -2.39073100 |
| C | -1 | -6.09808300 | -3.34300800 | -2.42691100 |
| C | -1 | -3.54710600 | 4.91457500  | 3.31258600  |
| C | -1 | 1.27405600  | 2.82442600  | 2.03808400  |
| C | -1 | 0.75414900  | 3.00362100  | -2.46954200 |
| C | -1 | -3.54119800 | 3.93046700  | -1.89895400 |
| C | -1 | -5.03723600 | -2.44266000 | -1.88258800 |
| C | -1 | -4.54349000 | -2.62143200 | 2.33674400  |
| C | -1 | -0.02842600 | -3.67127100 | 1.74594700  |
| C | -1 | -3.03319100 | 3.71324400  | 2.58679900  |
| C | -1 | -0.52889300 | -3.45025300 | -2.44888900 |
| H | 0  | -1.87645000 | -1.87228200 | 2.79172000  |
| H | 0  | 1.51458200  | 1.37231600  | -0.22526500 |
| H | 0  | -3.66956100 | 1.60361600  | -3.99035500 |
| H | 0  | -2.59014600 | 0.44457000  | -3.97811600 |
| H | 0  | -2.89304900 | 0.98670800  | 4.58222300  |
| H | 0  | -5.72186000 | 0.96433800  | 0.77521900  |
| H | 0  | -6.40439800 | 0.52075400  | -1.23710900 |
| H | 0  | -5.96584900 | 0.07869600  | 2.06495300  |
| H | 0  | -2.56990600 | -1.62614000 | -2.85821900 |
| H | 0  | -4.18651400 | 2.64934200  | 0.38844500  |
| H | 0  | -0.51565300 | 0.65339000  | -4.56454900 |
| H | 0  | -1.07649800 | -0.04609400 | 3.98818600  |
| H | 0  | 0.37905700  | 0.55701900  | 4.05987400  |
| H | 0  | 2.30032600  | -1.61867600 | 1.89506400  |
| O | 0  | -1.74834900 | 1.25846200  | -1.39298900 |
| O | 0  | -2.56925000 | 4.06760200  | -1.09621500 |
| O | 0  | -2.21145500 | 3.90900900  | 1.64570600  |
| O | 0  | 0.11804100  | 3.45602000  | -1.46867400 |
| O | 0  | 0.64194700  | 1.82778500  | -2.90581000 |
| O | 0  | 1.81559700  | -0.50425200 | -2.45176500 |
| O | 0  | -0.05084000 | -2.32771200 | -2.74947600 |
| O | 0  | 0.54977200  | -2.56558600 | 1.99335900  |
| O | 0  | -1.42002000 | -3.63936400 | -1.56372700 |
| O | 0  | -1.10984300 | -3.77325300 | 1.10960000  |
| O | 0  | -4.12322300 | -3.00079300 | -1.20660000 |
| O | 0  | -3.76244300 | -3.12706500 | 1.47905300  |
| O | 0  | -4.57992900 | -1.39434400 | 2.63661200  |
| O | 0  | -5.10316900 | -1.20222000 | -2.11027400 |
| O | 0  | -3.44332400 | -0.57182300 | 0.19066000  |

|    |   |             |             |             |
|----|---|-------------|-------------|-------------|
| O  | 0 | -2.38518900 | -1.10368100 | -2.07103300 |
| O  | 0 | -1.04145500 | 0.04657100  | -4.03104800 |
| O  | 0 | -3.55435900 | 0.67400700  | -3.74895000 |
| O  | 0 | -0.10342700 | -0.22939000 | 3.76817100  |
| O  | 0 | -0.58045500 | -1.21881200 | -0.23153800 |
| O  | 0 | 0.63353200  | 0.96928400  | -0.25035700 |
| O  | 0 | 1.24816700  | 1.61543500  | 2.39649400  |
| O  | 0 | 2.25819900  | -0.70883400 | 1.55496300  |
| O  | 0 | 0.46057500  | 3.34997900  | 1.22411900  |
| O  | 0 | -5.72372600 | 1.06976200  | -0.83236000 |
| O  | 0 | -5.52667900 | 0.88866500  | 1.76954800  |
| O  | 0 | -3.52409100 | 1.95596200  | 0.30885300  |
| O  | 0 | -4.00023400 | 2.81595400  | -2.27389700 |
| O  | 0 | -3.47649300 | 2.57702900  | 2.92590300  |
| O  | 0 | -2.67072100 | 0.24014400  | 4.01490200  |
| O  | 0 | -1.84518900 | -1.29187800 | 2.02434800  |
| O  | 0 | -1.38769600 | 1.13810900  | 1.46357600  |
| Zr | 0 | -2.35814700 | -2.32003400 | -0.05080700 |
| Zr | 0 | -0.33514500 | -0.12351000 | -2.08453200 |
| Zr | 0 | -3.79448200 | 0.59968000  | -1.47498900 |
| Zr | 0 | -3.28379800 | 0.47197700  | 2.04114100  |
| Zr | 0 | -1.27928900 | 2.64812700  | 0.03662800  |
| Zr | 0 | 0.11457900  | -0.30911200 | 1.48660500  |
| H  | 0 | 2.13786900  | -1.28022800 | -1.89031000 |
| Al | 0 | 5.63454500  | -1.96330300 | -1.89404700 |
| Al | 0 | 5.05531400  | 0.48740700  | -2.89469900 |
| Al | 0 | 3.62678500  | -0.77495400 | 0.11125200  |
| Al | 0 | 7.02021000  | 0.17458000  | -0.19674600 |
| Al | 0 | 4.69763000  | 2.14748500  | -0.88396700 |
| Al | 0 | 6.11938600  | -2.74535400 | 0.68216800  |
| Al | 0 | 4.92000800  | 1.75373100  | 1.76375000  |
| Al | 0 | 5.75141000  | -0.75205000 | 2.55138700  |
| H  | 0 | 2.85902200  | 1.16204300  | -2.14176400 |
| H  | 0 | 4.19311600  | -3.40603400 | -0.71353200 |
| H  | 0 | 9.10887700  | 1.26147000  | 0.00558400  |
| H  | 0 | 1.81046100  | -2.45080600 | -0.12000900 |
| H  | 0 | 5.71598000  | 3.86117300  | 0.62412900  |
| H  | 0 | 4.59005600  | 4.14020100  | -2.46711600 |
| H  | 0 | 7.98924000  | -1.45588700 | 1.83405200  |
| H  | 0 | 4.68798300  | -2.58459900 | 3.82096800  |
| H  | 0 | 5.17877300  | 3.19871200  | 3.75212300  |
| H  | 0 | 6.37696800  | 1.33053000  | 3.80970500  |
| H  | 0 | 7.32039700  | -0.58713300 | -2.97093100 |
| H  | 0 | 3.96005100  | -3.26859900 | -3.17459400 |
| H  | 0 | 2.45506400  | -0.43911900 | -3.22170000 |
| H  | 0 | 6.54150100  | 1.73246000  | -4.30136700 |
| H  | 0 | 4.36009000  | -1.91292100 | -3.90682500 |
| H  | 0 | 3.90992000  | 0.00354500  | -4.95944500 |
| O  | 0 | 4.41636900  | -0.71941300 | -1.53673900 |
| O  | 0 | 3.63248700  | 1.73177800  | -2.27822900 |
| O  | 0 | 5.15788200  | -3.38119400 | -0.85332200 |
| O  | 0 | 8.74178600  | 0.38830700  | -0.13617900 |
| O  | 0 | 6.85736700  | -1.59832700 | -0.57493400 |
| O  | 0 | 6.12353600  | 1.20013300  | -1.35852500 |
| O  | 0 | 2.58958200  | -2.16049000 | -0.60995500 |
| O  | 0 | 6.36912200  | -4.32698300 | 1.35247800  |
| O  | 0 | 5.31557900  | 3.61176200  | -2.11230700 |
| O  | 0 | 4.76670200  | -1.63297500 | 1.25707500  |

|    |   |             |             |             |
|----|---|-------------|-------------|-------------|
| O  | 0 | 3.81075600  | 1.11193900  | 0.39495600  |
| O  | 0 | 5.01489200  | 3.20461900  | 0.57312100  |
| O  | 0 | 6.26943900  | 0.61859300  | 1.39513100  |
| O  | 0 | 7.16213200  | -1.85251200 | 2.13562700  |
| O  | 0 | 5.05275200  | -1.71755900 | 4.03297800  |
| O  | 0 | 4.13991400  | 0.45235900  | 2.96550600  |
| O  | 0 | 5.65972600  | 2.62255400  | 3.15580000  |
| O  | 0 | 6.58666200  | 0.35789900  | 4.01557800  |
| O  | 0 | 6.42144000  | -0.86946400 | -3.17347600 |
| O  | 0 | 5.64738800  | 1.84258500  | -3.96704900 |
| O  | 0 | 4.72618600  | -2.74432800 | -3.44003500 |
| O  | 0 | 3.88951600  | -0.39125200 | -4.08115900 |
| H  | 0 | 3.33413800  | 0.10433600  | 2.47711200  |
| H  | 0 | -4.86483600 | -4.26158800 | 3.64649900  |
| H  | 0 | -6.17482400 | -3.05254600 | 3.68672800  |
| H  | 0 | -5.99429200 | -4.18778500 | 2.30429300  |
| H  | 0 | -5.63613700 | -4.17042700 | -2.97921200 |
| H  | 0 | -6.64729100 | -3.79988400 | -1.59300600 |
| H  | 0 | -6.80052500 | -2.80930300 | -3.07453800 |
| H  | 0 | -3.49978800 | 6.01405500  | -2.43894600 |
| H  | 0 | -4.68849000 | 5.02073300  | -3.36099000 |
| H  | 0 | -4.99374100 | 5.45388800  | -1.67562600 |
| H  | 0 | -2.79337400 | 5.70832000  | 3.34715500  |
| H  | 0 | -4.41038200 | 5.31053300  | 2.75927800  |
| H  | 0 | -3.89017900 | 4.66148700  | 4.32109200  |
| H  | 0 | 5.57337900  | 3.01320600  | -2.92072700 |
| H  | 0 | 6.95077300  | -4.33748800 | 2.11558400  |
| Ir | 0 | 3.77155400  | -0.32948300 | 4.92125500  |
| C  | 0 | 3.52846300  | -1.18210900 | 6.52360300  |
| C  | 0 | 2.61556400  | 0.99067500  | 5.44009000  |
| O  | 0 | 3.38144700  | -1.72701700 | 7.53051300  |
| O  | 0 | 1.84343600  | 1.81481700  | 5.70318500  |
| H  | 0 | 7.54705700  | 0.27612400  | 4.04909500  |
| H  | 0 | 2.42044200  | 3.40903300  | -3.76391700 |
| H  | 0 | 1.10233800  | 4.61647100  | -3.80129400 |
| H  | 0 | 2.17866000  | 4.58382300  | -2.41349100 |
| H  | 0 | 3.03193100  | 3.98052600  | 1.71933200  |
| H  | 0 | 1.96396300  | 4.64342200  | 2.95034300  |
| H  | 0 | 2.95232400  | 3.20304900  | 3.33750700  |
| H  | 0 | 0.92085300  | -4.97913100 | -2.67428300 |
| H  | 0 | -0.70664500 | -5.47908600 | -3.15912000 |
| H  | 0 | 0.26813300  | -4.38474400 | -4.20766500 |
| H  | 0 | 0.95766000  | -4.79474500 | 3.27087000  |
| H  | 0 | 0.01515200  | -5.79249000 | 2.10976200  |
| H  | 0 | 1.57093200  | -5.05684100 | 1.64432600  |

### Al<sub>8</sub>-NU-1000 (A\_2)

Electronic Energy: -7260.087438

Enthalpy: -7259.078430

Free Energy: -7259.295944

$\nu_{CO} = 2080, 2155 \text{ cm}^{-1}$

|   |    |            |             |             |
|---|----|------------|-------------|-------------|
| C | -1 | 1.68444800 | 3.94340000  | -3.15512100 |
| C | -1 | 0.64900500 | -4.90821400 | 2.22466400  |
| C | -1 | 2.37166400 | 3.70494700  | 2.55373300  |
| C | -1 | 0.00185700 | -4.64437500 | -3.17737100 |

|   |    |             |             |             |
|---|----|-------------|-------------|-------------|
| C | -1 | -5.46152300 | -3.56982200 | 3.03745400  |
| C | -1 | -4.20580500 | 5.17837200  | -2.39073100 |
| C | -1 | -6.09808300 | -3.34300800 | -2.42691100 |
| C | -1 | -3.54710600 | 4.91457500  | 3.31258600  |
| C | -1 | 1.27405600  | 2.82442600  | 2.03808400  |
| C | -1 | 0.75414900  | 3.00362100  | -2.46954200 |
| C | -1 | -3.54119800 | 3.93046700  | -1.89895400 |
| C | -1 | -5.03723600 | -2.44266000 | -1.88258800 |
| C | -1 | -4.54349000 | -2.62143200 | 2.33674400  |
| C | -1 | -0.02842600 | -3.67127100 | 1.74594700  |
| C | -1 | -3.03319100 | 3.71324400  | 2.58679900  |
| C | -1 | -0.52889300 | -3.45025300 | -2.44888900 |
| H | 0  | -1.86197200 | -1.85928100 | 2.79863900  |
| H | 0  | 1.46966500  | 1.41908900  | -0.24364000 |
| H | 0  | -3.67614200 | 1.60448900  | -3.98513200 |
| H | 0  | -2.59831200 | 0.44533800  | -3.97504800 |
| H | 0  | -2.86555100 | 0.98689500  | 4.58820700  |
| H | 0  | -5.72043800 | 0.96456200  | 0.79099100  |
| H | 0  | -6.41266600 | 0.52253100  | -1.22301700 |
| H | 0  | -5.95895000 | 0.07498300  | 2.07806300  |
| H | 0  | -2.57490900 | -1.62912100 | -2.85087200 |
| H | 0  | -4.18963600 | 2.65028900  | 0.39684800  |
| H | 0  | -0.52216600 | 0.66063100  | -4.56295400 |
| H | 0  | -1.02765600 | -0.02521200 | 3.99316200  |
| H | 0  | 0.45078500  | 0.55103200  | 4.03743400  |
| H | 0  | 2.17284600  | -1.73013500 | 1.70378800  |
| O | 0  | -1.76129100 | 1.26276400  | -1.39471400 |
| O | 0  | -2.56913900 | 4.06773700  | -1.09814600 |
| O | 0  | -2.21963200 | 3.91139000  | 1.64045500  |
| O | 0  | 0.10543600  | 3.45633000  | -1.47840700 |
| O | 0  | 0.65611400  | 1.82249400  | -2.90034900 |
| O | 0  | 1.80342500  | -0.48199500 | -2.37704500 |
| O | 0  | -0.04126200 | -2.32956000 | -2.74476600 |
| O | 0  | 0.54300000  | -2.56971900 | 2.01643000  |
| O | 0  | -1.42400700 | -3.63696400 | -1.56844100 |
| O | 0  | -1.10250300 | -3.77362000 | 1.10055300  |
| O | 0  | -4.12194300 | -2.99953900 | -1.20684500 |
| O | 0  | -3.76078800 | -3.12490500 | 1.47871100  |
| O | 0  | -4.57340600 | -1.39606100 | 2.64483800  |
| O | 0  | -5.10671200 | -1.20150400 | -2.10590500 |
| O | 0  | -3.44127800 | -0.56878000 | 0.19655700  |
| O | 0  | -2.38902200 | -1.10297000 | -2.06650400 |
| O | 0  | -1.04375800 | 0.04830300  | -4.03170500 |
| O | 0  | -3.56163100 | 0.67434300  | -3.74502100 |
| O | 0  | -0.05954300 | -0.22599200 | 3.76562900  |
| O | 0  | -0.57104000 | -1.21702600 | -0.22979100 |
| O | 0  | 0.59793300  | 1.00221700  | -0.25404500 |
| O | 0  | 1.26366100  | 1.60022600  | 2.36280200  |
| O | 0  | 2.24982900  | -0.79659600 | 1.44555800  |
| O | 0  | 0.44134800  | 3.34428700  | 1.23482300  |
| O | 0  | -5.72973100 | 1.06935100  | -0.81915600 |
| O | 0  | -5.52203000 | 0.88666100  | 1.78400900  |
| O | 0  | -3.52799300 | 1.95647000  | 0.31471100  |
| O | 0  | -4.00523400 | 2.81574000  | -2.26990300 |
| O | 0  | -3.46906300 | 2.57531000  | 2.93190800  |
| O | 0  | -2.63347500 | 0.24551900  | 4.01785900  |
| O | 0  | -1.83360900 | -1.28584000 | 2.02594600  |
| O | 0  | -1.38890100 | 1.14205800  | 1.46594000  |

|    |   |             |             |             |
|----|---|-------------|-------------|-------------|
| Zr | 0 | -2.35715500 | -2.30981400 | -0.04930600 |
| Zr | 0 | -0.35029300 | -0.11131200 | -2.07878000 |
| Zr | 0 | -3.80283900 | 0.60467500  | -1.46954300 |
| Zr | 0 | -3.27617200 | 0.47476600  | 2.05045900  |
| Zr | 0 | -1.27944400 | 2.65523900  | 0.04097900  |
| Zr | 0 | 0.12555100  | -0.28883100 | 1.48468200  |
| H  | 0 | 2.13300300  | -1.30371500 | -1.90363600 |
| Al | 0 | 5.51035500  | -2.06123500 | -2.09136400 |
| Al | 0 | 5.04088100  | 0.48575500  | -2.88271200 |
| Al | 0 | 3.62428400  | -0.83192500 | 0.07219300  |
| Al | 0 | 6.89388300  | -0.16867000 | -0.16125200 |
| Al | 0 | 4.90112900  | 2.05676900  | -0.72942800 |
| Al | 0 | 6.08275500  | -2.90838400 | 0.45100100  |
| Al | 0 | 4.93126600  | 1.48273300  | 1.97132000  |
| Al | 0 | 5.83615600  | -1.09094400 | 2.62745900  |
| H  | 0 | 2.95662400  | 1.26434900  | -1.98669300 |
| H  | 0 | 4.10457000  | -3.45341900 | -0.87606000 |
| H  | 0 | 9.22746500  | 0.66188000  | -0.45566500 |
| H  | 0 | 5.43919300  | -3.56300400 | 2.85167300  |
| H  | 0 | 1.81594200  | -2.55665900 | -0.22680200 |
| H  | 0 | 5.93338300  | 3.61443600  | 0.98090500  |
| H  | 0 | 4.92723900  | 4.14803200  | -2.18059900 |
| H  | 0 | 7.95333100  | -2.38456300 | 2.22876000  |
| H  | 0 | 4.14532600  | -2.86015600 | 3.32235100  |
| H  | 0 | 5.18042000  | 2.12818800  | 4.17481800  |
| H  | 0 | 6.44839200  | -0.58936200 | 4.86837000  |
| H  | 0 | 7.20686800  | -0.73854900 | -3.15587200 |
| H  | 0 | 3.62641800  | -3.12553400 | -3.28414900 |
| H  | 0 | 2.42910900  | -0.33343600 | -3.14995400 |
| H  | 0 | 6.55035600  | 1.68665700  | -4.31978600 |
| H  | 0 | 4.14054700  | -1.81043400 | -4.00562200 |
| H  | 0 | 3.76469200  | 0.20254700  | -4.92887800 |
| O  | 0 | 4.38821500  | -0.77875400 | -1.60178700 |
| O  | 0 | 3.76206500  | 1.78190000  | -2.13275800 |
| O  | 0 | 5.06891900  | -3.52180400 | -1.06291700 |
| O  | 0 | 8.61982700  | 0.29735200  | 0.19125000  |
| O  | 0 | 6.86339900  | -1.83261100 | -0.86198900 |
| O  | 0 | 6.21477600  | 0.99085100  | -1.31997600 |
| O  | 0 | 2.63339200  | -2.29050000 | -0.66597900 |
| O  | 0 | 5.99696500  | -4.39430400 | 1.41312100  |
| O  | 0 | 5.59997600  | 3.51208600  | -1.90812200 |
| O  | 0 | 4.90488000  | -1.65914300 | 1.03237500  |
| O  | 0 | 3.95956600  | 0.96967900  | 0.45156700  |
| O  | 0 | 5.25723200  | 2.96329500  | 0.77491300  |
| O  | 0 | 6.46157300  | 0.46499400  | 1.52646100  |
| O  | 0 | 7.18324600  | -2.08881700 | 1.73713000  |
| O  | 0 | 5.10291400  | -2.82517900 | 3.43849500  |
| O  | 0 | 4.36342000  | 0.02113100  | 3.02880300  |
| O  | 0 | 5.24706000  | 2.55857400  | 3.31830400  |
| O  | 0 | 6.86229500  | -0.68209000 | 4.00843500  |
| O  | 0 | 6.28886300  | -0.94870200 | -3.35348800 |
| O  | 0 | 5.71030500  | 1.85016100  | -3.88447300 |
| O  | 0 | 4.43733200  | -2.69856800 | -3.59214600 |
| O  | 0 | 3.78024300  | -0.24750100 | -4.07776500 |
| H  | 0 | 3.49161500  | -0.25950900 | 2.69575300  |
| H  | 0 | -4.86695300 | -4.22071700 | 3.69231500  |
| H  | 0 | -6.20698500 | -3.04942900 | 3.64696200  |
| H  | 0 | -5.95351500 | -4.22836800 | 2.31162800  |

|    |   |             |             |             |
|----|---|-------------|-------------|-------------|
| H  | 0 | -5.63782900 | -4.18676000 | -2.95509100 |
| H  | 0 | -6.66566300 | -3.77586100 | -1.59230800 |
| H  | 0 | -6.78560900 | -2.81404700 | -3.09415300 |
| H  | 0 | -3.49803900 | 6.01217500  | -2.44558100 |
| H  | 0 | -4.69543300 | 5.01959400  | -3.35731400 |
| H  | 0 | -4.98786700 | 5.45784200  | -1.67074900 |
| H  | 0 | -2.78529600 | 5.69982200  | 3.36321600  |
| H  | 0 | -4.39600000 | 5.32424900  | 2.74721200  |
| H  | 0 | -3.90803800 | 4.65955700  | 4.31424400  |
| H  | 0 | 5.77109300  | 2.96619200  | -2.76756700 |
| H  | 0 | 5.57035500  | -5.16210300 | 1.02577100  |
| Ir | 0 | 8.39843600  | 1.22148400  | 2.09774800  |
| C  | 0 | 8.02519400  | 1.82767800  | 3.79484600  |
| C  | 0 | 10.09067600 | 1.86870800  | 2.26839500  |
| O  | 0 | 7.86648800  | 2.19364000  | 4.87691800  |
| O  | 0 | 11.17078200 | 2.28472800  | 2.34095500  |
| H  | 0 | 3.15551300  | 3.76725800  | 1.78390000  |
| H  | 0 | 2.00747800  | 4.72565000  | 2.71781500  |
| H  | 0 | 2.84842600  | 3.30647300  | 3.45353600  |
| H  | 0 | 2.48273900  | 3.40561800  | -3.67716600 |
| H  | 0 | 1.11849500  | 4.53381100  | -3.89025300 |
| H  | 0 | 2.10306900  | 4.65613300  | -2.43483700 |
| H  | 0 | 0.94204700  | -4.95609500 | -2.69890800 |
| H  | 0 | -0.69055200 | -5.49135100 | -3.13158200 |
| H  | 0 | 0.23382700  | -4.39217900 | -4.21808400 |
| H  | 0 | 0.92718000  | -4.80695100 | 3.28081300  |
| H  | 0 | 0.02742800  | -5.79768900 | 2.08391600  |
| H  | 0 | 1.58513300  | -5.04317200 | 1.66352300  |

### Al<sub>8</sub>-NU-1000 (C)

Electronic Energy: -7260.067676

Enthalpy: -7259.059259

Free Energy: -7259.276594

$\nu_{CO} = 2073, 2146 \text{ cm}^{-1}$

|   |    |             |             |             |
|---|----|-------------|-------------|-------------|
| C | -1 | 1.68441900  | 3.94341500  | -3.15514000 |
| C | -1 | 0.64899900  | -4.90821600 | 2.22466600  |
| C | -1 | 2.37165700  | 3.70494900  | 2.55374400  |
| C | -1 | 0.00185000  | -4.64437900 | -3.17737000 |
| C | -1 | -5.46152400 | -3.56982100 | 3.03745400  |
| C | -1 | -4.20580600 | 5.17837100  | -2.39073300 |
| C | -1 | -6.09808400 | -3.34300700 | -2.42691100 |
| C | -1 | -3.54711000 | 4.91457400  | 3.31258500  |
| C | -1 | 1.27407100  | 2.82442300  | 2.03809500  |
| C | -1 | 0.75416700  | 3.00364000  | -2.46953500 |
| C | -1 | -3.54118900 | 3.93046700  | -1.89896000 |
| C | -1 | -5.03722900 | -2.44266000 | -1.88258700 |
| C | -1 | -4.54348500 | -2.62142800 | 2.33674300  |
| C | -1 | -0.02842400 | -3.67128600 | 1.74594600  |
| C | -1 | -3.03318900 | 3.71325000  | 2.58679300  |
| C | -1 | -0.52889700 | -3.45027300 | -2.44888800 |
| H | 0  | -1.87278700 | -1.86950600 | 2.79238800  |
| H | 0  | 1.52718600  | 1.33845600  | -0.24026200 |
| H | 0  | -3.66734000 | 1.60600300  | -3.98638500 |
| H | 0  | -2.59019500 | 0.44680300  | -3.97561500 |
| H | 0  | -2.87103000 | 0.98912200  | 4.58121200  |



|    |   |             |             |             |
|----|---|-------------|-------------|-------------|
| H  | 0 | -5.71665700 | 0.96363200  | 0.78363200  |
| H  | 0 | -6.40649300 | 0.52326400  | -1.23042600 |
| H  | 0 | -5.95295100 | 0.06897600  | 2.06678400  |
| H  | 0 | -2.57407000 | -1.62523600 | -2.85757600 |
| H  | 0 | -4.18458600 | 2.64911200  | 0.39268800  |
| H  | 0 | -0.51466000 | 0.67160600  | -4.55582200 |
| H  | 0 | -1.03399000 | -0.03874300 | 3.98720300  |
| H  | 0 | 0.42989200  | 0.55947900  | 4.00628700  |
| H  | 0 | 2.30388900  | -1.59327400 | 1.88649400  |
| O  | 0 | -1.75023400 | 1.25955400  | -1.39211500 |
| O  | 0 | -2.57001100 | 4.06694800  | -1.09562200 |
| O  | 0 | -2.20984400 | 3.90879900  | 1.64732100  |
| O  | 0 | 0.11169300  | 3.45991400  | -1.47582200 |
| O  | 0 | 0.65305100  | 1.82139700  | -2.89433800 |
| O  | 0 | 1.81753900  | -0.52279300 | -2.38918400 |
| O  | 0 | -0.05507500 | -2.32815100 | -2.75733900 |
| O  | 0 | 0.55304400  | -2.56800500 | 1.99350700  |
| O  | 0 | -1.42223700 | -3.63582300 | -1.56482300 |
| O  | 0 | -1.11216600 | -3.77293500 | 1.11418100  |
| O  | 0 | -4.12261700 | -3.00134000 | -1.20791400 |
| O  | 0 | -3.76584700 | -3.12678100 | 1.47609300  |
| O  | 0 | -4.57287600 | -1.39578600 | 2.64327200  |
| O  | 0 | -5.10457900 | -1.20194800 | -2.10743700 |
| O  | 0 | -3.44112500 | -0.57129800 | 0.19265900  |
| O  | 0 | -2.38917600 | -1.10157800 | -2.07142100 |
| O  | 0 | -1.03364300 | 0.05133000  | -4.03155600 |
| O  | 0 | -3.55350800 | 0.67570300  | -3.74699500 |
| O  | 0 | -0.06526100 | -0.23723000 | 3.76496700  |
| O  | 0 | -0.57922000 | -1.22878800 | -0.23685300 |
| O  | 0 | 0.62740800  | 0.97234700  | -0.25215600 |
| O  | 0 | 1.23103000  | 1.62191600  | 2.40749700  |
| O  | 0 | 2.24827800  | -0.68447300 | 1.55054200  |
| O  | 0 | 0.46856300  | 3.35161000  | 1.21562800  |
| O  | 0 | -5.72389000 | 1.07055000  | -0.82694000 |
| O  | 0 | -5.52005400 | 0.88421800  | 1.77665400  |
| O  | 0 | -3.52238400 | 1.95584600  | 0.31152800  |
| O  | 0 | -4.00059500 | 2.81559600  | -2.27352900 |
| O  | 0 | -3.47455600 | 2.57673400  | 2.92777200  |
| O  | 0 | -2.63981000 | 0.24563700  | 4.01369900  |
| O  | 0 | -1.84068000 | -1.29188200 | 2.02329200  |
| O  | 0 | -1.38414200 | 1.13843600  | 1.46113600  |
| Zr | 0 | -2.36035100 | -2.32027500 | -0.05144900 |
| Zr | 0 | -0.34187700 | -0.12304900 | -2.08008600 |
| Zr | 0 | -3.79641300 | 0.60174400  | -1.47194200 |
| Zr | 0 | -3.27419200 | 0.47283500  | 2.04367100  |
| Zr | 0 | -1.27325200 | 2.64983800  | 0.03683800  |
| Zr | 0 | 0.11973300  | -0.31323500 | 1.47462200  |
| H  | 0 | 2.12238700  | -1.27028500 | -1.77224700 |
| Al | 0 | 5.71481300  | -2.08041800 | -1.66916800 |
| Al | 0 | 5.05133000  | 0.26574900  | -2.86527400 |
| Al | 0 | 3.64806000  | -0.72729200 | 0.17222100  |
| Al | 0 | 7.05717400  | 0.29995700  | -0.24116100 |
| Al | 0 | 4.64726600  | 2.20456700  | -1.05972100 |
| Al | 0 | 6.22911100  | -2.50192600 | 0.97217700  |
| Al | 0 | 4.85190100  | 1.79734300  | 1.60192300  |
| Al | 0 | 5.83881400  | -0.42136600 | 2.67348100  |
| H  | 0 | 2.84592400  | 1.11606500  | -2.31594400 |
| H  | 0 | 4.98613600  | -4.18416400 | -0.44462600 |

|    |   |             |             |             |
|----|---|-------------|-------------|-------------|
| H  | 0 | 9.08673000  | 1.50994300  | -0.33996500 |
| H  | 0 | 6.66451400  | -4.29857800 | 2.52709900  |
| H  | 0 | 1.88169900  | -2.50210000 | -0.10039400 |
| H  | 0 | 5.62799900  | 3.93507000  | 0.48477000  |
| H  | 0 | 4.60540200  | 3.72567300  | -2.90959400 |
| H  | 0 | 8.06998600  | -1.08208600 | 1.98788700  |
| H  | 0 | 4.31745500  | -1.89155700 | 3.98040000  |
| H  | 0 | 5.51487100  | -2.70772000 | 3.40427700  |
| H  | 0 | 5.17335400  | 3.15178400  | 3.71803700  |
| H  | 0 | 6.23895500  | 1.97161500  | 3.50948900  |
| H  | 0 | 6.58203600  | 0.37830600  | 4.83169800  |
| H  | 0 | 7.31570300  | -0.89571100 | -3.03755700 |
| H  | 0 | 3.63343600  | -2.94245800 | -2.20413300 |
| H  | 0 | 2.42664800  | -0.57838900 | -3.18113400 |
| H  | 0 | 6.02937800  | 1.29199100  | -4.96530800 |
| H  | 0 | 4.17943700  | -2.26372700 | -3.48176800 |
| H  | 0 | 3.91553700  | -0.48552900 | -4.94951000 |
| O  | 0 | 4.49036600  | -0.80543900 | -1.43632300 |
| O  | 0 | 3.67331400  | 1.59849400  | -2.46792400 |
| O  | 0 | 5.66580000  | -3.51041100 | -0.53050000 |
| O  | 0 | 8.75626500  | 0.61132200  | -0.36343700 |
| O  | 0 | 6.92890500  | -1.49552700 | -0.43465600 |
| O  | 0 | 6.08293200  | 1.19040600  | -1.47855800 |
| O  | 0 | 2.64781000  | -2.16350500 | -0.58077400 |
| O  | 0 | 5.91630100  | -3.80118300 | 2.18763800  |
| O  | 0 | 5.22621600  | 3.61654400  | -2.17899900 |
| O  | 0 | 4.83124300  | -1.42214600 | 1.35159400  |
| O  | 0 | 3.74696500  | 1.17462500  | 0.24442900  |
| O  | 0 | 4.95966400  | 3.24371200  | 0.45515600  |
| O  | 0 | 6.30651200  | 0.80989600  | 1.30885100  |
| O  | 0 | 7.27984100  | -1.57893000 | 2.23128800  |
| O  | 0 | 5.28126700  | -1.86992100 | 3.93183500  |
| O  | 0 | 4.21491700  | 0.68723300  | 2.92043000  |
| O  | 0 | 5.74449300  | 2.78993400  | 3.03147100  |
| O  | 0 | 6.68000800  | 0.63067500  | 3.91045600  |
| O  | 0 | 6.39661300  | -1.17917900 | -3.11071700 |
| O  | 0 | 5.90248700  | 1.46161100  | -4.02976900 |
| O  | 0 | 4.39131900  | -2.99904500 | -2.83033900 |
| O  | 0 | 3.89668100  | -0.66611800 | -4.00627800 |
| H  | 0 | 3.37984100  | 0.27489700  | 2.62076000  |
| Ir | 0 | 7.07316900  | 3.02484000  | -3.14496900 |
| C  | 0 | 8.57726500  | 2.57025600  | -4.07293800 |
| C  | 0 | 7.91090500  | 4.51712400  | -2.51358900 |
| O  | 0 | 9.51244300  | 2.26899200  | -4.68595000 |
| O  | 0 | 8.41440200  | 5.48302100  | -2.11868400 |
| H  | 0 | -4.86466800 | -4.24937400 | 3.66006400  |
| H  | 0 | -6.18433800 | -3.05168700 | 3.67548900  |
| H  | 0 | -5.98232700 | -4.20023300 | 2.30649200  |
| H  | 0 | -5.63647400 | -4.17475600 | -2.97283600 |
| H  | 0 | -6.65199600 | -3.79360500 | -1.59266600 |
| H  | 0 | -6.79677100 | -2.81053100 | -3.07957300 |
| H  | 0 | -3.49788200 | 6.01201600  | -2.44592400 |
| H  | 0 | -4.69532900 | 5.01907700  | -3.35722600 |
| H  | 0 | -4.98778000 | 5.45832600  | -1.67084300 |
| H  | 0 | -2.79124400 | 5.70610400  | 3.35190800  |
| H  | 0 | -4.40605500 | 5.31497800  | 2.75574400  |
| H  | 0 | -3.89636400 | 4.66064100  | 4.31874500  |
| H  | 0 | 3.06271500  | 3.93169000  | 1.72807500  |

|   |   |             |             |             |
|---|---|-------------|-------------|-------------|
| H | 0 | 1.97383200  | 4.67099300  | 2.88845500  |
| H | 0 | 2.90907500  | 3.21867800  | 3.37782900  |
| H | 0 | 1.63435700  | -4.99022700 | 1.74555400  |
| H | 0 | 0.83872000  | -4.84005200 | 3.30327700  |
| H | 0 | 0.06456200  | -5.80691500 | 2.00649000  |
| H | 0 | 1.05478500  | -4.79416300 | -2.90109700 |
| H | 0 | -0.55996000 | -5.55360800 | -2.94243000 |
| H | 0 | -0.01016200 | -4.45977300 | -4.25832300 |
| H | 0 | 2.28233900  | 3.43801600  | -3.91928500 |
| H | 0 | 1.10802600  | 4.75912400  | -3.61292800 |
| H | 0 | 2.34017500  | 4.41869200  | -2.41342000 |

### Al<sub>8</sub>-NU-1000 (C<sub>geminal</sub>)

Electronic Energy: -7260.079171

Enthalpy: -7259.069431

Free Energy: -7259.285969

$\nu_{CO} = 2084, 2154 \text{ cm}^{-1}$

|   |    |             |             |             |
|---|----|-------------|-------------|-------------|
| C | -1 | 1.68444800  | 3.94340000  | -3.15512100 |
| C | -1 | 0.64900500  | -4.90821400 | 2.22466400  |
| C | -1 | 2.37166400  | 3.70494700  | 2.55373300  |
| C | -1 | 0.00185700  | -4.64437500 | -3.17737100 |
| C | -1 | -5.46152300 | -3.56982200 | 3.03745400  |
| C | -1 | -4.20580500 | 5.17837200  | -2.39073100 |
| C | -1 | -6.09808300 | -3.34300800 | -2.42691100 |
| C | -1 | -3.54710600 | 4.91457500  | 3.31258600  |
| C | -1 | 1.27405600  | 2.82442600  | 2.03808400  |
| C | -1 | 0.75414900  | 3.00362100  | -2.46954200 |
| C | -1 | -3.54119800 | 3.93046700  | -1.89895400 |
| C | -1 | -5.03723600 | -2.44266000 | -1.88258800 |
| C | -1 | -4.54349000 | -2.62143200 | 2.33674400  |
| C | -1 | -0.02842600 | -3.67127100 | 1.74594700  |
| C | -1 | -3.03319100 | 3.71324400  | 2.58679900  |
| C | -1 | -0.52889300 | -3.45025300 | -2.44888900 |
| H | 0  | -1.86790100 | -1.86450900 | 2.79622200  |
| H | 0  | 1.47861000  | 1.41189500  | -0.22162600 |
| H | 0  | -3.66658800 | 1.60512700  | -3.98517600 |
| H | 0  | -2.59039100 | 0.44414800  | -3.97427100 |
| H | 0  | -2.87296700 | 0.98925800  | 4.58521300  |
| H | 0  | -5.71957200 | 0.96356200  | 0.78519800  |
| H | 0  | -6.40748800 | 0.51941600  | -1.22843200 |
| H | 0  | -5.95727600 | 0.07135600  | 2.07053500  |
| H | 0  | -2.57101500 | -1.62835200 | -2.85251100 |
| H | 0  | -4.18858200 | 2.64988800  | 0.39290300  |
| H | 0  | -0.51547600 | 0.65942200  | -4.55842900 |
| H | 0  | -1.03470400 | -0.02841900 | 3.99362800  |
| H | 0  | 0.43425200  | 0.56565000  | 4.02170100  |
| H | 0  | 2.22824100  | -1.68933400 | 1.74367900  |
| O | 0  | -1.75627400 | 1.26040000  | -1.39392500 |
| O | 0  | -2.56992200 | 4.06756900  | -1.09698000 |
| O | 0  | -2.21540400 | 3.91041000  | 1.64383800  |
| O | 0  | 0.10707300  | 3.45849500  | -1.47845700 |
| O | 0  | 0.65180200  | 1.82288000  | -2.90021100 |
| O | 0  | 1.81557300  | -0.49332400 | -2.36938400 |
| O | 0  | -0.04213100 | -2.32981300 | -2.74505400 |
| O | 0  | 0.54288200  | -2.56964100 | 2.01501200  |

|    |   |             |             |             |
|----|---|-------------|-------------|-------------|
| O  | 0 | -1.42451600 | -3.63779400 | -1.56869100 |
| O  | 0 | -1.10513400 | -3.77420000 | 1.10315000  |
| O  | 0 | -4.12298300 | -3.00018800 | -1.20623100 |
| O  | 0 | -3.76168100 | -3.12592900 | 1.47889700  |
| O  | 0 | -4.57522400 | -1.39588800 | 2.64337300  |
| O  | 0 | -5.10501900 | -1.20198500 | -2.10851400 |
| O  | 0 | -3.44254900 | -0.57013300 | 0.19494300  |
| O  | 0 | -2.38639300 | -1.10351700 | -2.06699400 |
| O  | 0 | -1.03733500 | 0.04501800  | -4.02972900 |
| O  | 0 | -3.55428600 | 0.67432400  | -3.74660900 |
| O  | 0 | -0.06540400 | -0.22541500 | 3.77017300  |
| O  | 0 | -0.57317800 | -1.21813000 | -0.23050800 |
| O  | 0 | 0.60265500  | 1.00106400  | -0.24816000 |
| O  | 0 | 1.24405800  | 1.60868300  | 2.38324700  |
| O  | 0 | 2.24223400  | -0.75955500 | 1.46348600  |
| O  | 0 | 0.45316700  | 3.34666000  | 1.22371400  |
| O  | 0 | -5.72705400 | 1.06918600  | -0.82437900 |
| O  | 0 | -5.52354500 | 0.88562000  | 1.77883100  |
| O  | 0 | -3.52648200 | 1.95635900  | 0.31261500  |
| O  | 0 | -4.00323400 | 2.81580300  | -2.27242000 |
| O  | 0 | -3.47296100 | 2.57632800  | 2.92995100  |
| O  | 0 | -2.64182600 | 0.24532800  | 4.01791400  |
| O  | 0 | -1.83780900 | -1.28803900 | 2.02598900  |
| O  | 0 | -1.39053000 | 1.14093800  | 1.46632400  |
| Zr | 0 | -2.35658500 | -2.31190100 | -0.04979500 |
| Zr | 0 | -0.34185600 | -0.11488500 | -2.07716500 |
| Zr | 0 | -3.79801200 | 0.60353500  | -1.47122900 |
| Zr | 0 | -3.27688800 | 0.47466600  | 2.04766500  |
| Zr | 0 | -1.27558600 | 2.65211200  | 0.04080900  |
| Zr | 0 | 0.12291400  | -0.29747200 | 1.48532200  |
| H  | 0 | 2.16077600  | -1.29741900 | -1.86706400 |
| Al | 0 | 5.64078100  | -1.86467900 | -2.01599500 |
| Al | 0 | 5.03035700  | 0.62393100  | -2.85476800 |
| Al | 0 | 3.63644300  | -0.74771100 | 0.11326100  |
| Al | 0 | 7.08712700  | 0.22887900  | -0.20662500 |
| Al | 0 | 4.75771200  | 2.17693100  | -0.73308700 |
| Al | 0 | 6.12733100  | -2.61407200 | 0.50344600  |
| Al | 0 | 4.98607400  | 1.61135800  | 1.93367500  |
| Al | 0 | 5.82416000  | -0.88161900 | 2.54085900  |
| H  | 0 | 2.87454100  | 1.24603400  | -1.98682100 |
| H  | 0 | 4.34825400  | -3.45431900 | -0.81842600 |
| H  | 0 | 9.21360400  | 1.21709400  | 0.06942500  |
| H  | 0 | 5.55509300  | -3.66492600 | 2.53669600  |
| H  | 0 | 1.94601300  | -2.58332700 | -0.19993600 |
| H  | 0 | 5.82286400  | 3.79522000  | 0.90562700  |
| H  | 0 | 4.57388100  | 4.24814500  | -2.22156400 |
| H  | 0 | 8.05059600  | -1.61881800 | 1.69487000  |
| H  | 0 | 4.40770000  | -2.35704900 | 3.93566400  |
| H  | 0 | 5.13707500  | 2.26359500  | 4.14650500  |
| H  | 0 | 6.96624800  | 0.54024300  | 4.20935000  |
| H  | 0 | 7.27794400  | -0.46051200 | -3.07020700 |
| H  | 0 | 3.80686700  | -3.02944200 | -3.14509900 |
| H  | 0 | 2.45047100  | -0.34594600 | -3.13288000 |
| H  | 0 | 6.45515400  | 1.92879800  | -4.27331200 |
| H  | 0 | 4.27458600  | -1.73785900 | -3.92649100 |
| H  | 0 | 3.81594100  | 0.20257400  | -4.90295500 |
| O  | 0 | 4.42890700  | -0.67049200 | -1.54224800 |
| O  | 0 | 3.64161300  | 1.81998900  | -2.12879000 |

|    |   |             |             |             |
|----|---|-------------|-------------|-------------|
| O  | 0 | 5.31625700  | -3.39786100 | -0.97627200 |
| O  | 0 | 8.81164100  | 0.39874100  | -0.22409400 |
| O  | 0 | 6.90091700  | -1.53368600 | -0.72253800 |
| O  | 0 | 6.14908100  | 1.24068700  | -1.34043200 |
| O  | 0 | 2.72252000  | -2.24823100 | -0.66524400 |
| O  | 0 | 5.73605100  | -4.16769800 | 1.68684300  |
| O  | 0 | 5.31290600  | 3.70031600  | -1.93013300 |
| O  | 0 | 4.79374300  | -1.67108700 | 1.17968600  |
| O  | 0 | 3.88328400  | 1.08121400  | 0.47815400  |
| O  | 0 | 5.18127000  | 3.09786000  | 0.75344600  |
| O  | 0 | 6.38383300  | 0.50677400  | 1.43071200  |
| O  | 0 | 7.23437600  | -2.09912000 | 1.88863400  |
| O  | 0 | 5.35129700  | -2.40634600 | 3.73100700  |
| O  | 0 | 4.36592000  | 0.20325600  | 3.04966100  |
| O  | 0 | 5.43067700  | 2.62642200  | 3.30760300  |
| O  | 0 | 6.87961100  | -0.40247600 | 4.02285400  |
| O  | 0 | 6.37933400  | -0.74402200 | -3.27624800 |
| O  | 0 | 5.57460900  | 2.01363000  | -3.89857800 |
| O  | 0 | 4.60737800  | -2.60666400 | -3.48676400 |
| O  | 0 | 3.83167100  | -0.22522600 | -4.04006900 |
| H  | 0 | 3.50123900  | -0.09521900 | 2.71137600  |
| H  | 0 | -4.86622000 | -4.23129600 | 3.68087500  |
| H  | 0 | -6.19903800 | -3.05009600 | 3.65716100  |
| H  | 0 | -5.96400600 | -4.21822500 | 2.30953400  |
| H  | 0 | -5.63708200 | -4.18076000 | -2.96406500 |
| H  | 0 | -6.65905600 | -3.78478000 | -1.59257000 |
| H  | 0 | -6.79110200 | -2.81229500 | -3.08708600 |
| H  | 0 | -3.49899900 | 6.01326100  | -2.44135000 |
| H  | 0 | -4.69117400 | 5.02061700  | -3.35966700 |
| H  | 0 | -4.99147100 | 5.45535100  | -1.67369800 |
| H  | 0 | -2.78515900 | 5.69965600  | 3.36443200  |
| H  | 0 | -4.39544000 | 5.32492600  | 2.74683500  |
| H  | 0 | -3.90921500 | 4.65912000  | 4.31375200  |
| H  | 0 | 5.53492300  | 3.15210000  | -2.77455400 |
| H  | 0 | 6.47522200  | -4.74826700 | 1.91108600  |
| Ir | 0 | 6.49424700  | -1.85532600 | 5.43924100  |
| C  | 0 | 6.01373300  | -3.27516900 | 6.49832700  |
| C  | 0 | 7.54637000  | -1.20849000 | 6.79275000  |
| O  | 0 | 5.68973700  | -4.17509800 | 7.15009400  |
| O  | 0 | 8.20804700  | -0.78677500 | 7.64065500  |
| H  | 0 | 3.10909200  | 3.85311800  | 1.75180400  |
| H  | 0 | 1.98443300  | 4.69820600  | 2.81064700  |
| H  | 0 | 2.89933900  | 3.26511600  | 3.40570000  |
| H  | 0 | 2.45722400  | 3.40992800  | -3.71772600 |
| H  | 0 | 1.10803300  | 4.57273300  | -3.84903300 |
| H  | 0 | 2.13364600  | 4.62483600  | -2.42232300 |
| H  | 0 | 0.95003200  | -4.94613000 | -2.70878300 |
| H  | 0 | -0.68454000 | -5.49555200 | -3.12074200 |
| H  | 0 | 0.22156900  | -4.39462600 | -4.22132600 |
| H  | 0 | 0.84292700  | -4.83764000 | 3.30236300  |
| H  | 0 | 0.06298300  | -5.80717400 | 2.01098700  |
| H  | 0 | 1.63072000  | -4.99537600 | 1.73807000  |

### Al<sub>8</sub>-NU-1000 (geminal)

Electronic Energy: -7260.092324

Enthalpy: -7259.082441

Free Energy: -7259.297700

$\nu_{\text{CO}} = 2084, 2155 \text{ cm}^{-1}$

|   |    |             |             |             |
|---|----|-------------|-------------|-------------|
| C | -1 | 1.68444800  | 3.94340000  | -3.15512100 |
| C | -1 | 0.64900500  | -4.90821400 | 2.22466400  |
| C | -1 | 2.37166400  | 3.70494700  | 2.55373300  |
| C | -1 | 0.00185700  | -4.64437500 | -3.17737100 |
| C | -1 | -5.46152300 | -3.56982200 | 3.03745400  |
| C | -1 | -4.20580500 | 5.17837200  | -2.39073100 |
| C | -1 | -6.09808300 | -3.34300800 | -2.42691100 |
| C | -1 | -3.54710600 | 4.91457500  | 3.31258600  |
| C | -1 | 1.27405600  | 2.82442600  | 2.03808400  |
| C | -1 | 0.75414900  | 3.00362100  | -2.46954200 |
| C | -1 | -3.54119800 | 3.93046700  | -1.89895400 |
| C | -1 | -5.03723600 | -2.44266000 | -1.88258800 |
| C | -1 | -4.54349000 | -2.62143200 | 2.33674400  |
| C | -1 | -0.02842600 | -3.67127100 | 1.74594700  |
| C | -1 | -3.03319100 | 3.71324400  | 2.58679900  |
| C | -1 | -0.52889300 | -3.45025300 | -2.44888900 |
| H | 0  | -1.89576700 | -1.93768000 | 2.72114900  |
| H | 0  | 1.49721600  | 1.37111300  | -0.23396700 |
| H | 0  | -3.65623100 | 1.60395300  | -4.00929000 |
| H | 0  | -2.57410800 | 0.44433800  | -3.97870300 |
| H | 0  | -2.74861100 | 1.15928300  | 4.50892100  |
| H | 0  | -5.73195300 | 0.95133300  | 0.76210200  |
| H | 0  | -6.40931300 | 0.51310700  | -1.24299700 |
| H | 0  | -5.97383100 | 0.07736200  | 2.06597600  |
| H | 0  | -2.56654800 | -1.62411800 | -2.85491800 |
| H | 0  | -4.20463800 | 2.64705800  | 0.39386900  |
| H | 0  | -0.50782600 | 0.64808300  | -4.55343300 |
| H | 0  | 0.54120500  | 0.43454400  | 4.06001300  |
| H | 0  | 2.27960900  | -1.62604400 | 1.84054300  |
| O | 0  | -1.76333700 | 1.26312300  | -1.39115800 |
| O | 0  | -2.56974800 | 4.06522900  | -1.09762700 |
| O | 0  | -2.22856500 | 3.91247600  | 1.63570500  |
| O | 0  | 0.10998200  | 3.46390300  | -1.47634400 |
| O | 0  | 0.64628500  | 1.82459200  | -2.89513800 |
| O | 0  | 1.80926600  | -0.49989200 | -2.36335800 |
| O | 0  | -0.05095900 | -2.32800300 | -2.74728800 |
| O | 0  | 0.54474300  | -2.57009200 | 2.00681600  |
| O | 0  | -1.42336500 | -3.63788200 | -1.56483900 |
| O | 0  | -1.11584600 | -3.77075500 | 1.11515100  |
| O | 0  | -4.12108600 | -2.99810500 | -1.20975100 |
| O | 0  | -3.77671400 | -3.11442600 | 1.46371400  |
| O | 0  | -4.55007100 | -1.39872900 | 2.67734600  |
| O | 0  | -5.10479300 | -1.20164900 | -2.11450500 |
| O | 0  | -3.46707800 | -0.56453700 | 0.18484800  |
| O | 0  | -2.39005000 | -1.09965100 | -2.06706700 |
| O | 0  | -1.03857300 | 0.04649700  | -4.01896200 |
| O | 0  | -3.54342400 | 0.67652600  | -3.75903700 |
| O | 0  | 0.02513200  | -0.30446200 | 3.71173200  |
| O | 0  | -0.58174000 | -1.21479000 | -0.22446300 |
| O | 0  | 0.59922900  | 1.00225000  | -0.23624300 |
| O | 0  | 1.24541800  | 1.61639300  | 2.38956100  |
| O | 0  | 2.25381200  | -0.71597200 | 1.50321500  |
| O | 0  | 0.45111400  | 3.35660200  | 1.23380500  |
| O | 0  | -5.73390800 | 1.06871700  | -0.83803600 |
| O | 0  | -5.52852200 | 0.87852900  | 1.75714700  |
| O | 0  | -3.53944100 | 1.95718700  | 0.30699300  |

|    |   |             |             |             |
|----|---|-------------|-------------|-------------|
| O  | 0 | -4.00453600 | 2.81669000  | -2.27560000 |
| O  | 0 | -3.45720400 | 2.56832900  | 2.93904300  |
| O  | 0 | -2.71699400 | 0.29446000  | 4.08058800  |
| O  | 0 | -1.85986700 | -1.28962400 | 2.00351000  |
| O  | 0 | -1.40821200 | 1.14159200  | 1.46107300  |
| Zr | 0 | -2.34454900 | -2.31227100 | -0.06214400 |
| Zr | 0 | -0.33746300 | -0.11988300 | -2.06399400 |
| Zr | 0 | -3.80294800 | 0.60956300  | -1.49296900 |
| Zr | 0 | -3.28430400 | 0.46661500  | 1.99459000  |
| Zr | 0 | -1.26821800 | 2.64963600  | 0.03258400  |
| Zr | 0 | 0.12747800  | -0.29316900 | 1.52657100  |
| H  | 0 | 2.11327800  | -1.27148800 | -1.77823800 |
| Al | 0 | 5.66489000  | -2.08367300 | -1.73799700 |
| Al | 0 | 5.06242500  | 0.29573100  | -2.93641500 |
| Al | 0 | 3.64770800  | -0.74913200 | 0.14512800  |
| Al | 0 | 7.06187400  | 0.22926900  | -0.22010800 |
| Al | 0 | 4.74316100  | 2.08610100  | -1.00531700 |
| Al | 0 | 6.24637900  | -2.57693100 | 0.87895900  |
| Al | 0 | 4.87288800  | 1.82322600  | 1.68398600  |
| Al | 0 | 5.77822100  | -0.53028800 | 2.56922300  |
| H  | 0 | 2.88925600  | 1.11238600  | -2.22020900 |
| H  | 0 | 4.92833300  | -4.19760300 | -0.54930100 |
| H  | 0 | 9.15145400  | 1.26344500  | 0.16438400  |
| H  | 0 | 5.61302500  | -2.81823000 | 3.32953200  |
| H  | 0 | 1.90022300  | -2.54642800 | -0.14707900 |
| H  | 0 | 5.69685200  | 3.87950200  | 0.46617000  |
| H  | 0 | 4.67310300  | 3.96887700  | -2.74269900 |
| H  | 0 | 8.03117000  | -1.06982100 | 1.72385800  |
| H  | 0 | 4.47579100  | -2.02967000 | 4.08770500  |
| H  | 0 | 5.08019400  | 3.23001800  | 3.66518700  |
| H  | 0 | 7.29054600  | -0.94165500 | -3.08225000 |
| H  | 0 | 3.57574400  | -2.92691600 | -2.24269000 |
| H  | 0 | 6.58141200  | 1.37964000  | -4.43746700 |
| H  | 0 | 4.10036100  | -2.22127200 | -3.52267800 |
| H  | 0 | 3.84726500  | -0.37588400 | -4.91926000 |
| O  | 0 | 4.48562500  | -0.77959300 | -1.46342900 |
| O  | 0 | 3.69212600  | 1.62661300  | -2.39796600 |
| O  | 0 | 5.63143500  | -3.54671700 | -0.62510400 |
| O  | 0 | 8.78695200  | 0.40065700  | -0.03812900 |
| O  | 0 | 6.92264300  | -1.55595800 | -0.50695300 |
| O  | 0 | 6.17663000  | 1.13308500  | -1.47135800 |
| O  | 0 | 2.66457700  | -2.20073400 | -0.62482300 |
| O  | 0 | 6.03009800  | -3.87982400 | 2.09855100  |
| O  | 0 | 5.40166400  | 3.47852600  | -2.34200900 |
| O  | 0 | 4.83069900  | -1.52489000 | 1.28602200  |
| O  | 0 | 3.79207000  | 1.13846200  | 0.30277800  |
| O  | 0 | 4.99578300  | 3.22461500  | 0.39588600  |
| O  | 0 | 6.29195800  | 0.76470600  | 1.31873900  |
| O  | 0 | 7.30918900  | -1.57255500 | 2.13593600  |
| O  | 0 | 5.41241100  | -1.97651300 | 3.86218800  |
| O  | 0 | 4.26292700  | 0.54855800  | 2.94391300  |
| O  | 0 | 5.63202400  | 2.80468300  | 3.00561500  |
| O  | 0 | 6.65201000  | 0.55542500  | 3.96513200  |
| O  | 0 | 6.36324300  | -1.18495200 | -3.17970400 |
| O  | 0 | 5.69013700  | 1.53050300  | -4.11305800 |
| O  | 0 | 4.32385200  | -2.96985100 | -2.88384400 |
| O  | 0 | 3.82045600  | -0.63932600 | -3.99388000 |
| H  | 0 | 3.41950400  | 0.16044800  | 2.63722600  |

|    |   |             |             |             |
|----|---|-------------|-------------|-------------|
| H  | 0 | -4.92931500 | -3.99317700 | 3.90171900  |
| H  | 0 | -6.35348500 | -3.06474400 | 3.42395000  |
| H  | 0 | -5.73831300 | -4.40359700 | 2.38410500  |
| H  | 0 | -5.63533600 | -4.15625600 | -2.99949900 |
| H  | 0 | -6.63189500 | -3.82005400 | -1.59441300 |
| H  | 0 | -6.81281600 | -2.80544400 | -3.05763200 |
| H  | 0 | -3.50630800 | 6.02039300  | -2.41558200 |
| H  | 0 | -4.66667300 | 5.02696400  | -3.37262300 |
| H  | 0 | -5.01242300 | 5.43823400  | -1.69074700 |
| H  | 0 | -2.79764800 | 5.71268800  | 3.33231300  |
| H  | 0 | -4.41927800 | 5.30157100  | 2.76699100  |
| H  | 0 | -3.87785100 | 4.66702800  | 4.32670800  |
| H  | 0 | 5.65532200  | 2.82212400  | -3.08777900 |
| H  | 0 | 6.79948200  | -4.36473200 | 2.40700300  |
| H  | 0 | 3.08392200  | 3.89961400  | 1.73677400  |
| H  | 0 | 1.98029600  | 4.68448100  | 2.85427100  |
| H  | 0 | 2.89127200  | 3.23420600  | 3.39669000  |
| H  | 0 | 2.38247700  | 3.41031200  | -3.80850600 |
| H  | 0 | 1.10087700  | 4.65961200  | -3.75081100 |
| H  | 0 | 2.22644900  | 4.53708700  | -2.40751200 |
| H  | 0 | 1.00352500  | -4.87821100 | -2.78951300 |
| H  | 0 | -0.63498400 | -5.52411200 | -3.04114800 |
| H  | 0 | 0.12386300  | -4.41785800 | -4.24272900 |
| H  | 0 | 0.75597600  | -4.87320800 | 3.31690200  |
| H  | 0 | 0.10414300  | -5.81301000 | 1.93930000  |
| H  | 0 | 1.66906800  | -4.94862000 | 1.81929600  |
| H  | 0 | 7.60788900  | 0.56320600  | 3.83442500  |
| H  | 0 | 6.34468400  | 1.49859700  | 3.73509500  |
| Ir | 0 | -1.42692400 | -1.09574200 | 4.99275200  |
| C  | 0 | -2.78830300 | -1.77285100 | 6.02513400  |
| C  | 0 | -0.23247800 | -2.30571800 | 5.67908600  |
| O  | 0 | 0.54205300  | -3.06400400 | 6.08017000  |
| O  | 0 | -3.66062600 | -2.19734700 | 6.65226000  |
| H  | 0 | 2.43078300  | -0.52776000 | -3.16078100 |

### Al<sub>8</sub>-NU-1000 (opposite)

Electronic Energy: -7260.093549

Enthalpy: -7259.083675

Free Energy: -7259.298270

$\nu_{CO} = 2084, 2156 \text{ cm}^{-1}$

|   |    |             |             |             |
|---|----|-------------|-------------|-------------|
| C | -1 | 1.68444800  | 3.94340000  | -3.15512100 |
| C | -1 | 0.64900500  | -4.90821400 | 2.22466400  |
| C | -1 | 2.37166400  | 3.70494700  | 2.55373300  |
| C | -1 | 0.00185700  | -4.64437500 | -3.17737100 |
| C | -1 | -5.46152300 | -3.56982200 | 3.03745400  |
| C | -1 | -4.20580500 | 5.17837200  | -2.39073100 |
| C | -1 | -6.09808300 | -3.34300800 | -2.42691100 |
| C | -1 | -3.54710600 | 4.91457500  | 3.31258600  |
| C | -1 | 1.27405600  | 2.82442600  | 2.03808400  |
| C | -1 | 0.75414900  | 3.00362100  | -2.46954200 |
| C | -1 | -3.54119800 | 3.93046700  | -1.89895400 |
| C | -1 | -5.03723600 | -2.44266000 | -1.88258800 |
| C | -1 | -4.54349000 | -2.62143200 | 2.33674400  |
| C | -1 | -0.02842600 | -3.67127100 | 1.74594700  |
| C | -1 | -3.03319100 | 3.71324400  | 2.58679900  |



|    |    |             |             |             |
|----|----|-------------|-------------|-------------|
| C  | -1 | -0.52889300 | -3.45025300 | -2.44888900 |
| H  | 0  | -1.87657000 | -1.87426300 | 2.78452900  |
| H  | 0  | 1.51229300  | 1.35993900  | -0.23621500 |
| H  | 0  | -3.67437500 | 1.60341300  | -3.99756800 |
| H  | 0  | -2.57541300 | 0.45634400  | -3.98240100 |
| H  | 0  | -2.88929200 | 0.97082400  | 4.59093200  |
| H  | 0  | -6.38323900 | 0.32828000  | -1.14158300 |
| H  | 0  | -5.95820400 | 0.13682300  | 2.16421000  |
| H  | 0  | -2.57681500 | -1.61911500 | -2.86866400 |
| H  | 0  | -4.09241400 | 2.71168700  | 0.39080000  |
| H  | 0  | -0.50740700 | 0.65805400  | -4.56833300 |
| H  | 0  | -1.04998100 | -0.03153600 | 3.98457600  |
| H  | 0  | 0.42330900  | 0.55156100  | 4.02088500  |
| H  | 0  | 2.27910000  | -1.61117900 | 1.87865200  |
| O  | 0  | -1.74636500 | 1.25637000  | -1.41322500 |
| O  | 0  | -2.55063700 | 4.06169800  | -1.12422600 |
| O  | 0  | -2.21552600 | 3.91171100  | 1.63921200  |
| O  | 0  | 0.11524500  | 3.45657500  | -1.47258300 |
| O  | 0  | 0.64811900  | 1.82512200  | -2.90296900 |
| O  | 0  | 1.81961200  | -0.50811600 | -2.37852000 |
| O  | 0  | -0.05190100 | -2.32886500 | -2.75718600 |
| O  | 0  | 0.54743900  | -2.56778100 | 1.99780400  |
| O  | 0  | -1.42136100 | -3.63473500 | -1.56442500 |
| O  | 0  | -1.11119000 | -3.77550900 | 1.11115300  |
| O  | 0  | -4.11040300 | -3.00326200 | -1.23143100 |
| O  | 0  | -3.77826300 | -3.12474200 | 1.46089700  |
| O  | 0  | -4.56603600 | -1.40078300 | 2.65081300  |
| O  | 0  | -5.11804000 | -1.19351400 | -2.07999200 |
| O  | 0  | -3.43567100 | -0.56768300 | 0.17906700  |
| O  | 0  | -2.38579700 | -1.10020700 | -2.08066000 |
| O  | 0  | -1.03408000 | 0.04910400  | -4.03791100 |
| O  | 0  | -3.54123500 | 0.67937600  | -3.74511800 |
| O  | 0  | -0.07853100 | -0.23631200 | 3.76567400  |
| O  | 0  | -0.57851800 | -1.22390000 | -0.24158100 |
| O  | 0  | 0.61593300  | 0.98598300  | -0.25118000 |
| O  | 0  | 1.23352300  | 1.62027100  | 2.40159600  |
| O  | 0  | 2.24417000  | -0.69636300 | 1.55561200  |
| O  | 0  | 0.46442400  | 3.35403400  | 1.21982600  |
| O  | 0  | -5.79482900 | 1.05123500  | -0.88977500 |
| O  | 0  | -5.45367400 | 0.91940300  | 1.90817100  |
| O  | 0  | -3.49275600 | 1.95829200  | 0.29592100  |
| O  | 0  | -4.03582000 | 2.81321000  | -2.23889900 |
| O  | 0  | -3.47358400 | 2.57980600  | 2.92725100  |
| O  | 0  | -2.63967000 | 0.24281800  | 4.01130900  |
| O  | 0  | -1.84946400 | -1.29499100 | 2.01633500  |
| O  | 0  | -1.38872500 | 1.13630000  | 1.46146800  |
| Zr | 0  | -2.35389300 | -2.32014700 | -0.04940500 |
| Zr | 0  | -0.32497500 | -0.12741700 | -2.09038100 |
| Zr | 0  | -3.74876700 | 0.60221800  | -1.47105100 |
| Zr | 0  | -3.31563200 | 0.46857100  | 2.05197700  |
| Zr | 0  | -1.26073900 | 2.64076100  | 0.04848800  |
| Zr | 0  | 0.11044200  | -0.30566800 | 1.48125000  |
| H  | 0  | 2.12137400  | -1.26166200 | -1.76985600 |
| Al | 0  | 5.67140000  | -2.08099500 | -1.68105300 |
| Al | 0  | 5.07493900  | 0.28483700  | -2.90748700 |
| Al | 0  | 3.64083200  | -0.72808700 | 0.18103200  |
| Al | 0  | 7.05606000  | 0.25057800  | -0.18350500 |
| Al | 0  | 4.73217700  | 2.09346000  | -0.99909900 |

|    |   |             |             |             |
|----|---|-------------|-------------|-------------|
| Al | 0 | 6.24072100  | -2.54536000 | 0.94344600  |
| Al | 0 | 4.85760500  | 1.86269200  | 1.69486100  |
| Al | 0 | 5.76237600  | -0.48014500 | 2.60860600  |
| H  | 0 | 2.88773500  | 1.10349800  | -2.22493100 |
| H  | 0 | 4.93628900  | -4.18915600 | -0.47630400 |
| H  | 0 | 9.14307100  | 1.29370500  | 0.19346600  |
| H  | 0 | 5.59716200  | -2.75990500 | 3.39273600  |
| H  | 0 | 1.87545300  | -2.50586700 | -0.10878300 |
| H  | 0 | 5.67921100  | 3.90315600  | 0.45302800  |
| H  | 0 | 4.66848000  | 3.95844800  | -2.75489800 |
| H  | 0 | 8.01951600  | -1.02720100 | 1.77943100  |
| H  | 0 | 4.45132400  | -1.96261000 | 4.12748000  |
| H  | 0 | 5.07652900  | 3.31430500  | 3.64674700  |
| H  | 0 | 7.30611000  | -0.95412400 | -3.02659800 |
| H  | 0 | 3.58453800  | -2.92620600 | -2.19624700 |
| H  | 0 | 6.60128400  | 1.36010400  | -4.40788200 |
| H  | 0 | 4.12425900  | -2.24047200 | -3.47968600 |
| H  | 0 | 3.88965900  | -0.41123900 | -4.89821500 |
| O  | 0 | 4.48697500  | -0.77804800 | -1.42625100 |
| O  | 0 | 3.69434200  | 1.61494700  | -2.39411300 |
| O  | 0 | 5.63349600  | -3.53221500 | -0.55326500 |
| O  | 0 | 8.77977500  | 0.42802500  | 0.00143500  |
| O  | 0 | 6.92173900  | -1.53844100 | -0.44967500 |
| O  | 0 | 6.17174500  | 1.13911000  | -1.44626800 |
| O  | 0 | 2.64511500  | -2.16694200 | -0.58327100 |
| O  | 0 | 6.02210500  | -3.83577500 | 2.17611400  |
| O  | 0 | 5.39568800  | 3.47379000  | -2.34478700 |
| O  | 0 | 4.82062900  | -1.49293900 | 1.33241900  |
| O  | 0 | 3.77678200  | 1.15857800  | 0.31786500  |
| O  | 0 | 4.97858300  | 3.24692400  | 0.39055000  |
| O  | 0 | 6.27675100  | 0.79963500  | 1.34455000  |
| O  | 0 | 7.29605300  | -1.52576300 | 2.19387100  |
| O  | 0 | 5.39110500  | -1.91306000 | 3.91521900  |
| O  | 0 | 4.24593100  | 0.60113000  | 2.96551500  |
| O  | 0 | 5.62190900  | 2.85639500  | 3.00399600  |
| O  | 0 | 6.63070500  | 0.62010400  | 3.99554700  |
| O  | 0 | 6.37903500  | -1.19718700 | -3.12693900 |
| O  | 0 | 5.70606300  | 1.50883300  | -4.09348500 |
| O  | 0 | 4.33864500  | -2.98115100 | -2.82813900 |
| O  | 0 | 3.84892100  | -0.66603300 | -3.97085700 |
| H  | 0 | 3.40188000  | 0.20880700  | 2.66502500  |
| H  | 0 | -4.86622700 | -4.32223500 | 3.57070000  |
| H  | 0 | -6.11797400 | -3.06004300 | 3.74938500  |
| H  | 0 | -6.06115600 | -4.12025600 | 2.30149100  |
| H  | 0 | -5.63613800 | -4.17103500 | -2.97781000 |
| H  | 0 | -6.64627200 | -3.79791600 | -1.59118200 |
| H  | 0 | -6.80233300 | -2.81094100 | -3.07411700 |
| H  | 0 | -3.46983300 | 5.96675600  | -2.58386000 |
| H  | 0 | -4.81842200 | 4.99196600  | -3.27877800 |
| H  | 0 | -4.87011200 | 5.54944700  | -1.59716100 |
| H  | 0 | -2.74850700 | 5.64822000  | 3.47133800  |
| H  | 0 | -4.30352800 | 5.40416100  | 2.68238400  |
| H  | 0 | -4.02113600 | 4.64611700  | 4.26208500  |
| H  | 0 | 5.65661900  | 2.81128000  | -3.08267000 |
| H  | 0 | 6.79225300  | -4.31352100 | 2.49381500  |
| H  | 0 | 3.07713800  | 3.91049900  | 1.73375800  |
| H  | 0 | 1.97732100  | 4.68088600  | 2.86263800  |
| H  | 0 | 2.89609800  | 3.23135700  | 3.39224000  |

|    |   |             |             |             |
|----|---|-------------|-------------|-------------|
| H  | 0 | 2.38722000  | 3.40867700  | -3.80218000 |
| H  | 0 | 1.10203500  | 4.65332800  | -3.75948100 |
| H  | 0 | 2.22008000  | 4.54445300  | -2.40876400 |
| H  | 0 | 1.05144300  | -4.80035600 | -2.89201800 |
| H  | 0 | -0.56652100 | -5.55158900 | -2.95041600 |
| H  | 0 | 0.00129700  | -4.45566000 | -4.25762900 |
| H  | 0 | 0.83636400  | -4.84064400 | 3.30373300  |
| H  | 0 | 0.06558400  | -5.80718700 | 2.00481700  |
| H  | 0 | 1.63505800  | -4.98961700 | 1.74683700  |
| H  | 0 | 7.58729100  | 0.62669800  | 3.87020400  |
| H  | 0 | 6.32432000  | 1.56133200  | 3.75513600  |
| Ir | 0 | -6.47740100 | 2.26836100  | 0.68251400  |
| C  | 0 | -6.95522700 | 3.30052500  | 2.12353100  |
| C  | 0 | -7.30436000 | 3.42479000  | -0.48129700 |
| O  | 0 | -7.22530300 | 3.94696600  | 3.04189300  |
| O  | 0 | -7.80708800 | 4.14799800  | -1.22932100 |
| H  | 0 | 2.45378100  | -0.54668700 | -3.16646600 |

**Table S7.** XYZ Cartesian Coordinates of Selected Optimized Al<sub>8</sub>-NU-1000 Isomers at the M06 Density Functional.

**Al<sub>8</sub>-NU-1000 (A)**

Electronic Energy: -7257.804163

Enthalpy: -7256.796085

Free Energy: -7257.012297

$\nu_{CO} = 2089, 2176 \text{ cm}^{-1}$

|   |    |             |             |             |
|---|----|-------------|-------------|-------------|
| C | -1 | 1.68444800  | 3.94340000  | -3.15512100 |
| C | -1 | 0.64900500  | -4.90821400 | 2.22466400  |
| C | -1 | 2.37166400  | 3.70494700  | 2.55373300  |
| C | -1 | 0.00185700  | -4.64437500 | -3.17737100 |
| C | -1 | -5.46152300 | -3.56982200 | 3.03745400  |
| C | -1 | -4.20580500 | 5.17837200  | -2.39073100 |
| C | -1 | -6.09808300 | -3.34300800 | -2.42691100 |
| C | -1 | -3.54710600 | 4.91457500  | 3.31258600  |
| C | -1 | 1.27405600  | 2.82442600  | 2.03808400  |
| C | -1 | 0.75414900  | 3.00362100  | -2.46954200 |
| C | -1 | -3.54119800 | 3.93046700  | -1.89895400 |
| C | -1 | -5.03723600 | -2.44266000 | -1.88258800 |
| C | -1 | -4.54349000 | -2.62143200 | 2.33674400  |
| C | -1 | -0.02842600 | -3.67127100 | 1.74594700  |
| C | -1 | -3.03319100 | 3.71324400  | 2.58679900  |
| C | -1 | -0.52889300 | -3.45025300 | -2.44888900 |
| H | 0  | -1.87038300 | -1.84782700 | 2.78006700  |
| H | 0  | 1.53492700  | 1.31652300  | -0.24214300 |
| H | 0  | -3.70112100 | 1.63489600  | -3.93159500 |
| H | 0  | -2.62112800 | 0.47118800  | -3.98482600 |
| H | 0  | -2.93219100 | 0.97259000  | 4.57752900  |
| H | 0  | -5.73207900 | 0.94817400  | 0.81297200  |
| H | 0  | -6.39009600 | 0.53253900  | -1.25951800 |
| H | 0  | -5.90413700 | 0.03767500  | 2.10065200  |
| H | 0  | -2.56688100 | -1.60274000 | -2.84582200 |
| H | 0  | -4.17803100 | 2.62401500  | 0.39120200  |
| H | 0  | -0.50963300 | 0.63260200  | -4.56893500 |
| H | 0  | -1.04833100 | -0.03360100 | 3.99786200  |
| H | 0  | 0.38878100  | 0.61415600  | 4.00564600  |
| H | 0  | 2.26227400  | -1.66184900 | 1.83923600  |
| O | 0  | -1.73849000 | 1.26623700  | -1.38798800 |
| O | 0  | -2.57263000 | 4.06403300  | -1.09612800 |
| O | 0  | -2.21466800 | 3.90749600  | 1.64567300  |
| O | 0  | 0.11616400  | 3.45034500  | -1.47017000 |
| O | 0  | 0.64722800  | 1.82908600  | -2.90279000 |
| O | 0  | 1.78826600  | -0.52416900 | -2.50724700 |
| O | 0  | -0.06141700 | -2.32888800 | -2.75632500 |
| O | 0  | 0.54050800  | -2.56807200 | 2.00921700  |
| O | 0  | -1.41418500 | -3.63544600 | -1.56039700 |
| O | 0  | -1.10244800 | -3.76883500 | 1.10201800  |
| O | 0  | -4.12405500 | -2.99661700 | -1.20512100 |
| O | 0  | -3.75744700 | -3.12171300 | 1.48431600  |

|    |   |             |             |             |
|----|---|-------------|-------------|-------------|
| O  | 0 | -4.58232300 | -1.39645500 | 2.63400300  |
| O  | 0 | -5.09614900 | -1.20581900 | -2.11479600 |
| O  | 0 | -3.43782700 | -0.57687900 | 0.19050900  |
| O  | 0 | -2.37913600 | -1.09123900 | -2.05141800 |
| O  | 0 | -1.05175100 | 0.06169300  | -4.01280900 |
| O  | 0 | -3.57557700 | 0.69506700  | -3.73119100 |
| O  | 0 | -0.08321700 | -0.19509300 | 3.75467600  |
| O  | 0 | -0.58085500 | -1.22525800 | -0.22876200 |
| O  | 0 | 0.64275700  | 0.93618700  | -0.26257400 |
| O  | 0 | 1.26433100  | 1.61064200  | 2.37809200  |
| O  | 0 | 2.24834300  | -0.75771800 | 1.47868900  |
| O  | 0 | 0.45387300  | 3.34392200  | 1.23201000  |
| O  | 0 | -5.70212600 | 1.05343600  | -0.83054300 |
| O  | 0 | -5.51079500 | 0.86981300  | 1.79502000  |
| O  | 0 | -3.50460400 | 1.94126200  | 0.30784700  |
| O  | 0 | -3.99907800 | 2.81842200  | -2.27300700 |
| O  | 0 | -3.47572300 | 2.57785400  | 2.91859900  |
| O  | 0 | -2.67523400 | 0.24980100  | 3.99419700  |
| O  | 0 | -1.83641800 | -1.27477400 | 2.00651300  |
| O  | 0 | -1.37498700 | 1.14048700  | 1.44834300  |
| Zr | 0 | -2.35495300 | -2.31842000 | -0.05081600 |
| Zr | 0 | -0.34193900 | -0.12223400 | -2.08525400 |
| Zr | 0 | -3.78546700 | 0.59299700  | -1.46071500 |
| Zr | 0 | -3.26287800 | 0.47442900  | 2.03108000  |
| Zr | 0 | -1.28282400 | 2.65032700  | 0.03461100  |
| Zr | 0 | 0.11819700  | -0.31024800 | 1.47030300  |
| H  | 0 | 2.12391400  | -1.30838500 | -1.96484100 |
| Al | 0 | 5.64545200  | -1.97828700 | -1.99260900 |
| Al | 0 | 5.03285800  | 0.48495700  | -2.93304400 |
| Al | 0 | 3.62730100  | -0.84164200 | 0.04604800  |
| Al | 0 | 7.02672800  | 0.14789000  | -0.25920400 |
| Al | 0 | 4.67713100  | 2.12802000  | -0.89742000 |
| Al | 0 | 6.12784400  | -2.81154000 | 0.56846300  |
| Al | 0 | 4.92962800  | 1.66227500  | 1.73786200  |
| Al | 0 | 5.76585200  | -0.85623300 | 2.48738700  |
| H  | 0 | 2.81469400  | 1.17910700  | -2.18886300 |
| H  | 0 | 4.22400200  | -3.48029900 | -0.85554200 |
| H  | 0 | 9.10663200  | 1.28751500  | -0.18240500 |
| H  | 0 | 1.80723600  | -2.50574500 | -0.22442900 |
| H  | 0 | 5.68610600  | 3.81976100  | 0.65433300  |
| H  | 0 | 4.53810500  | 4.13658200  | -2.45914000 |
| H  | 0 | 8.02025600  | -1.63364500 | 1.82122200  |
| H  | 0 | 4.69199300  | -2.66764200 | 3.73747300  |
| H  | 0 | 5.16026100  | 3.07540500  | 3.74847900  |
| H  | 0 | 6.43530200  | 1.20846500  | 3.77933300  |
| H  | 0 | 7.32396200  | -0.57392200 | -3.06057800 |
| H  | 0 | 3.98583600  | -3.30209900 | -3.30884400 |
| H  | 0 | 2.41608400  | -0.43966400 | -3.28304600 |
| H  | 0 | 6.49432300  | 1.74373000  | -4.36399700 |
| H  | 0 | 4.34277500  | -1.90662800 | -4.00366500 |
| H  | 0 | 3.89270300  | 0.05929000  | -5.00536100 |
| O  | 0 | 4.42662100  | -0.75616800 | -1.60004600 |
| O  | 0 | 3.61464800  | 1.71728100  | -2.28687300 |

|    |   |             |             |             |
|----|---|-------------|-------------|-------------|
| O  | 0 | 5.18733800  | -3.41987800 | -0.98860000 |
| O  | 0 | 8.73531500  | 0.40728800  | -0.24400500 |
| O  | 0 | 6.85313000  | -1.62419200 | -0.65495400 |
| O  | 0 | 6.09501800  | 1.18336000  | -1.38223500 |
| O  | 0 | 2.58900300  | -2.20057400 | -0.69895900 |
| O  | 0 | 6.39986900  | -4.41089300 | 1.17369200  |
| O  | 0 | 5.27285100  | 3.61643600  | -2.10855200 |
| O  | 0 | 4.77792600  | -1.71707200 | 1.17774600  |
| O  | 0 | 3.82652500  | 1.04967100  | 0.35773500  |
| O  | 0 | 5.00327800  | 3.14524700  | 0.58262500  |
| O  | 0 | 6.27384100  | 0.52511100  | 1.35271800  |
| O  | 0 | 7.14979100  | -1.97401000 | 2.05651000  |
| O  | 0 | 5.04854200  | -1.79900400 | 3.96000700  |
| O  | 0 | 4.13028700  | 0.36235000  | 2.91877600  |
| O  | 0 | 5.64898100  | 2.51318600  | 3.14486700  |
| O  | 0 | 6.67853900  | 0.24066000  | 3.93721600  |
| O  | 0 | 6.41907100  | -0.85279000 | -3.24065000 |
| O  | 0 | 5.62225100  | 1.86069100  | -3.97810100 |
| O  | 0 | 4.72780400  | -2.73349400 | -3.55126100 |
| O  | 0 | 3.87048200  | -0.36634200 | -4.14152900 |
| H  | 0 | 3.31680500  | 0.04278400  | 2.42939900  |
| H  | 0 | -4.85814800 | -4.24899400 | 3.65926900  |
| H  | 0 | -6.18410900 | -3.04482900 | 3.67454800  |
| H  | 0 | -5.97960800 | -4.19872500 | 2.29898900  |
| H  | 0 | -5.62732600 | -4.15757900 | -2.99655100 |
| H  | 0 | -6.63080800 | -3.81624400 | -1.58788900 |
| H  | 0 | -6.80963100 | -2.79959600 | -3.06077700 |
| H  | 0 | -3.49365500 | 6.01266700  | -2.43526400 |
| H  | 0 | -4.68605800 | 5.01441300  | -3.36420200 |
| H  | 0 | -4.99567500 | 5.44868200  | -1.67140900 |
| H  | 0 | -2.78371300 | 5.70273000  | 3.35078700  |
| H  | 0 | -4.40598700 | 5.31267400  | 2.74847400  |
| H  | 0 | -3.89719100 | 4.65402700  | 4.31972300  |
| H  | 0 | 5.55151700  | 3.04077700  | -2.92146100 |
| H  | 0 | 6.96126400  | -4.46195800 | 1.94979100  |
| Ir | 0 | 3.75644800  | -0.43783400 | 4.83419200  |
| C  | 0 | 3.50716000  | -1.30925800 | 6.43844700  |
| C  | 0 | 2.58408800  | 0.87494000  | 5.35377400  |
| O  | 0 | 3.35817300  | -1.86094600 | 7.43329400  |
| O  | 0 | 1.80775600  | 1.69090000  | 5.60287200  |
| H  | 0 | 7.63982600  | 0.18397800  | 3.87889600  |
| H  | 0 | 2.47312200  | 3.39282100  | -3.68475600 |
| H  | 0 | 1.11282800  | 4.54408100  | -3.88155300 |
| H  | 0 | 2.10548100  | 4.64887100  | -2.42286900 |
| H  | 0 | 3.09718100  | 3.86252500  | 1.73769900  |
| H  | 0 | 1.98025500  | 4.69434600  | 2.82915300  |
| H  | 0 | 2.87856900  | 3.24382200  | 3.41391300  |
| H  | 0 | 0.97501600  | -4.91292500 | -2.73427600 |
| H  | 0 | -0.66953800 | -5.50715100 | -3.08197900 |
| H  | 0 | 0.17779900  | -4.39647100 | -4.23298200 |
| H  | 0 | 0.90212800  | -4.80650100 | 3.29000200  |
| H  | 0 | 0.03127800  | -5.79919100 | 2.05927700  |
| H  | 0 | 1.60245700  | -5.02082800 | 1.68313300  |

**Al<sub>3</sub>-NU-1000 (A\_2)**

Electronic Energy: -7257.807618

Enthalpy: -7256.798692

Free Energy: -7257.014368

 $\nu_{\text{CO}} = 2102, 2182 \text{ cm}^{-1}$ 

|   |    |             |             |             |
|---|----|-------------|-------------|-------------|
| C | -1 | 1.68444800  | 3.94340000  | -3.15512100 |
| C | -1 | 0.64900500  | -4.90821400 | 2.22466400  |
| C | -1 | 2.37166400  | 3.70494700  | 2.55373300  |
| C | -1 | 0.00185700  | -4.64437500 | -3.17737100 |
| C | -1 | -5.46152300 | -3.56982200 | 3.03745400  |
| C | -1 | -4.20580500 | 5.17837200  | -2.39073100 |
| C | -1 | -6.09808300 | -3.34300800 | -2.42691100 |
| C | -1 | -3.54710600 | 4.91457500  | 3.31258600  |
| C | -1 | 1.27405600  | 2.82442600  | 2.03808400  |
| C | -1 | 0.75414900  | 3.00362100  | -2.46954200 |
| C | -1 | -3.54119800 | 3.93046700  | -1.89895400 |
| C | -1 | -5.03723600 | -2.44266000 | -1.88258800 |
| C | -1 | -4.54349000 | -2.62143200 | 2.33674400  |
| C | -1 | -0.02842600 | -3.67127100 | 1.74594700  |
| C | -1 | -3.03319100 | 3.71324400  | 2.58679900  |
| C | -1 | -0.52889300 | -3.45025300 | -2.44888900 |
| H | 0  | -1.86362800 | -1.83541900 | 2.79269800  |
| H | 0  | 1.46831000  | 1.39411100  | -0.22891200 |
| H | 0  | -3.68974100 | 1.63717600  | -3.92653100 |
| H | 0  | -2.61327500 | 0.47180800  | -3.97982400 |
| H | 0  | -2.91494600 | 0.97794500  | 4.58395200  |
| H | 0  | -5.73208900 | 0.94899300  | 0.81914700  |
| H | 0  | -6.39253300 | 0.53254200  | -1.25530200 |
| H | 0  | -5.90544100 | 0.03558900  | 2.10376600  |
| H | 0  | -2.56383900 | -1.60490300 | -2.83891000 |
| H | 0  | -4.18058700 | 2.62470800  | 0.39308800  |
| H | 0  | -0.49472400 | 0.64311400  | -4.55351600 |
| H | 0  | -1.00237100 | -0.00459300 | 4.01192000  |
| H | 0  | 0.47385700  | 0.58685400  | 3.99226300  |
| H | 0  | 2.12122800  | -1.76149300 | 1.70050900  |
| O | 0  | -1.74524900 | 1.26805300  | -1.38968500 |
| O | 0  | -2.57390400 | 4.06356800  | -1.09575500 |
| O | 0  | -2.21849200 | 3.90851700  | 1.64403300  |
| O | 0  | 0.10658600  | 3.44085400  | -1.47406400 |
| O | 0  | 0.68295500  | 1.81887100  | -2.89023000 |
| O | 0  | 1.79958500  | -0.49588200 | -2.39741700 |
| O | 0  | -0.03923200 | -2.33236500 | -2.73977500 |
| O | 0  | 0.52788800  | -2.57263400 | 2.04206000  |
| O | 0  | -1.42548200 | -3.63229200 | -1.57256400 |
| O | 0  | -1.09117300 | -3.76924400 | 1.08684200  |
| O | 0  | -4.12556400 | -2.99498400 | -1.20154800 |
| O | 0  | -3.75461900 | -3.12026400 | 1.48553500  |
| O | 0  | -4.57964600 | -1.39756500 | 2.63924800  |
| O | 0  | -5.09506700 | -1.20598400 | -2.11647600 |

|    |   |             |             |             |
|----|---|-------------|-------------|-------------|
| O  | 0 | -3.43572200 | -0.57474200 | 0.19526800  |
| O  | 0 | -2.37605000 | -1.09140900 | -2.04591500 |
| O  | 0 | -1.03430400 | 0.06186800  | -4.00565800 |
| O  | 0 | -3.56744300 | 0.69589000  | -3.72992400 |
| O  | 0 | -0.04573200 | -0.19977500 | 3.76209000  |
| O  | 0 | -0.57318500 | -1.22188200 | -0.22048100 |
| O  | 0 | 0.60077500  | 0.97055000  | -0.24704800 |
| O  | 0 | 1.26316600  | 1.60178500  | 2.36266800  |
| O  | 0 | 2.21925500  | -0.83310800 | 1.42735000  |
| O  | 0 | 0.44162900  | 3.33858300  | 1.23565000  |
| O  | 0 | -5.70391800 | 1.05186300  | -0.82553800 |
| O  | 0 | -5.51199500 | 0.86866000  | 1.80121200  |
| O  | 0 | -3.50823500 | 1.94069800  | 0.31125400  |
| O  | 0 | -4.00057400 | 2.81784700  | -2.27267400 |
| O  | 0 | -3.47474000 | 2.57753300  | 2.92119400  |
| O  | 0 | -2.64873300 | 0.25903000  | 3.99988300  |
| O  | 0 | -1.83169600 | -1.27024000 | 2.01325400  |
| O  | 0 | -1.38458000 | 1.14502900  | 1.45983100  |
| Zr | 0 | -2.35514400 | -2.30857500 | -0.04996900 |
| Zr | 0 | -0.34150200 | -0.11163100 | -2.07075300 |
| Zr | 0 | -3.78700000 | 0.59620700  | -1.45809000 |
| Zr | 0 | -3.26240400 | 0.47796400  | 2.04171600  |
| Zr | 0 | -1.28276800 | 2.65270900  | 0.04223900  |
| Zr | 0 | 0.11764700  | -0.29246300 | 1.48087300  |
| H  | 0 | 2.15450900  | -1.30919300 | -1.92468100 |
| Al | 0 | 5.57841500  | -1.97487500 | -2.06076600 |
| Al | 0 | 5.06170100  | 0.58307000  | -2.77896200 |
| Al | 0 | 3.63412100  | -0.86974300 | 0.11102000  |
| Al | 0 | 6.95461500  | -0.10124200 | -0.07304200 |
| Al | 0 | 4.89390000  | 2.08242300  | -0.56002300 |
| Al | 0 | 6.08214200  | -2.94067100 | 0.46713600  |
| Al | 0 | 4.91374000  | 1.36821200  | 2.10693000  |
| Al | 0 | 5.77823200  | -1.26086100 | 2.69340200  |
| H  | 0 | 2.95035400  | 1.33465500  | -1.89441500 |
| H  | 0 | 4.18265400  | -3.46249000 | -0.96393100 |
| H  | 0 | 9.21898600  | 0.89215600  | -0.27426800 |
| H  | 0 | 5.34459900  | -3.75360200 | 2.83422200  |
| H  | 0 | 1.84880500  | -2.59450400 | -0.29782100 |
| H  | 0 | 5.91238100  | 3.56869000  | 1.24208000  |
| H  | 0 | 4.93036500  | 4.27877900  | -1.91479100 |
| H  | 0 | 7.83310700  | -2.62277900 | 2.38164600  |
| H  | 0 | 4.03579300  | -3.05077800 | 3.24548200  |
| H  | 0 | 5.04551500  | 1.94474200  | 4.33978800  |
| H  | 0 | 6.28571600  | -0.85185400 | 4.96785200  |
| H  | 0 | 7.28114400  | -0.58757200 | -3.08632000 |
| H  | 0 | 3.74859500  | -3.06355100 | -3.36125200 |
| H  | 0 | 2.43680700  | -0.28617400 | -3.14123900 |
| H  | 0 | 6.55260500  | 1.85261700  | -4.18921200 |
| H  | 0 | 4.22154700  | -1.68900400 | -4.00764700 |
| H  | 0 | 3.83147300  | 0.39156100  | -4.84710200 |
| O  | 0 | 4.43140400  | -0.73205500 | -1.54904500 |
| O  | 0 | 3.77212700  | 1.83788000  | -1.97875300 |
| O  | 0 | 5.15219700  | -3.48824900 | -1.12741700 |



|    |   |             |             |             |
|----|---|-------------|-------------|-------------|
| O  | 0 | 8.65166100  | 0.39546900  | 0.32059200  |
| O  | 0 | 6.86966300  | -1.75912400 | -0.75633300 |
| O  | 0 | 6.22296000  | 1.06265700  | -1.17625800 |
| O  | 0 | 2.66685200  | -2.29192900 | -0.70963000 |
| O  | 0 | 5.95199600  | -4.49142000 | 1.31196600  |
| O  | 0 | 5.57436800  | 3.59933600  | -1.68019400 |
| O  | 0 | 4.85834900  | -1.76323200 | 1.08663800  |
| O  | 0 | 3.97846200  | 0.92756300  | 0.55884300  |
| O  | 0 | 5.26716800  | 2.90607500  | 0.98057100  |
| O  | 0 | 6.46014300  | 0.35453100  | 1.65243400  |
| O  | 0 | 7.14205400  | -2.24316600 | 1.83343900  |
| O  | 0 | 4.98449100  | -3.03656200 | 3.42666000  |
| O  | 0 | 4.33067100  | -0.12255400 | 3.10097900  |
| O  | 0 | 5.14566600  | 2.40031700  | 3.49956400  |
| O  | 0 | 6.74646000  | -0.93047900 | 4.13032600  |
| O  | 0 | 6.36224100  | -0.81234700 | -3.26012800 |
| O  | 0 | 5.73269700  | 1.99350900  | -3.71015000 |
| O  | 0 | 4.54177700  | -2.57114900 | -3.61270700 |
| O  | 0 | 3.83829100  | -0.10657600 | -4.02303500 |
| H  | 0 | 3.44607600  | -0.36884900 | 2.77874100  |
| H  | 0 | -4.86030400 | -4.21850700 | 3.69327000  |
| H  | 0 | -6.20785900 | -3.04262800 | 3.64468400  |
| H  | 0 | -5.94932000 | -4.22859100 | 2.30475400  |
| H  | 0 | -5.62774200 | -4.16824000 | -2.98115600 |
| H  | 0 | -6.64294300 | -3.80114900 | -1.58722200 |
| H  | 0 | -6.79988400 | -2.80242400 | -3.07390900 |
| H  | 0 | -3.49345000 | 6.01245900  | -2.43511300 |
| H  | 0 | -4.68635600 | 5.01489200  | -3.36413800 |
| H  | 0 | -4.99532100 | 5.44854200  | -1.67098700 |
| H  | 0 | -2.77505600 | 5.69325200  | 3.36983700  |
| H  | 0 | -4.38942500 | 5.32800500  | 2.73477000  |
| H  | 0 | -3.91802800 | 4.65160600  | 4.31147700  |
| H  | 0 | 5.76233400  | 3.10523800  | -2.56139700 |
| H  | 0 | 5.57780700  | -5.24385100 | 0.84834100  |
| Ir | 0 | 8.35314100  | 1.10296800  | 2.29740500  |
| C  | 0 | 7.91975900  | 1.54767400  | 4.04082000  |
| C  | 0 | 10.03456500 | 1.76007300  | 2.58887500  |
| O  | 0 | 7.71698600  | 1.82302200  | 5.13462500  |
| O  | 0 | 11.09783100 | 2.17814900  | 2.73989100  |
| H  | 0 | 3.12380200  | 3.80686500  | 1.75287800  |
| H  | 0 | 1.98711500  | 4.71196300  | 2.76755500  |
| H  | 0 | 2.89394400  | 3.27530200  | 3.41747300  |
| H  | 0 | 2.70270300  | 3.52813800  | -3.08197800 |
| H  | 0 | 1.44187100  | 3.99098000  | -4.22772700 |
| H  | 0 | 1.63324200  | 4.94754900  | -2.71629200 |
| H  | 0 | 0.96888800  | -4.92098600 | -2.72583500 |
| H  | 0 | -0.67539800 | -5.50385400 | -3.09332600 |
| H  | 0 | 0.18933500  | -4.39383800 | -4.23046400 |
| H  | 0 | 0.84199300  | -4.83123700 | 3.30486000  |
| H  | 0 | 0.05841000  | -5.80661400 | 2.00755600  |
| H  | 0 | 1.63056900  | -4.99086800 | 1.72937900  |

**Al<sub>8</sub>-NU-1000 (C)**

Electronic Energy: -7257.819875

Enthalpy: -7256.809948

Free Energy: -7257.026005

 $\nu_{CO} = 2094, 2168 \text{ cm}^{-1}$ 

|   |    |             |             |             |
|---|----|-------------|-------------|-------------|
| C | -1 | 1.68441900  | 3.94341500  | -3.15514000 |
| C | -1 | 0.64899900  | -4.90821600 | 2.22466600  |
| C | -1 | 2.37165700  | 3.70494900  | 2.55374400  |
| C | -1 | 0.00185000  | -4.64437900 | -3.17737000 |
| C | -1 | -5.46152400 | -3.56982100 | 3.03745400  |
| C | -1 | -4.20580600 | 5.17837100  | -2.39073300 |
| C | -1 | -6.09808400 | -3.34300700 | -2.42691100 |
| C | -1 | -3.54711000 | 4.91457400  | 3.31258500  |
| C | -1 | 1.27407100  | 2.82442300  | 2.03809500  |
| C | -1 | 0.75416700  | 3.00364000  | -2.46953500 |
| C | -1 | -3.54118900 | 3.93046700  | -1.89896000 |
| C | -1 | -5.03722900 | -2.44266000 | -1.88258700 |
| C | -1 | -4.54348500 | -2.62142800 | 2.33674300  |
| C | -1 | -0.02842400 | -3.67128600 | 1.74594600  |
| C | -1 | -3.03318900 | 3.71325000  | 2.58679300  |
| C | -1 | -0.52889700 | -3.45027300 | -2.44888800 |
| H | 0  | -1.86130000 | -1.84202700 | 2.78133100  |
| H | 0  | 1.54840400  | 1.29646400  | -0.24963000 |
| H | 0  | -3.70581800 | 1.63741600  | -3.92760500 |
| H | 0  | -2.62679800 | 0.47397400  | -3.98439400 |
| H | 0  | -2.90078400 | 0.97784500  | 4.57549500  |
| H | 0  | -5.72568500 | 0.94752400  | 0.82388500  |
| H | 0  | -6.39109800 | 0.53244500  | -1.24921000 |
| H | 0  | -5.89053100 | 0.03139000  | 2.10758500  |
| H | 0  | -2.57150700 | -1.60010800 | -2.84592700 |
| H | 0  | -4.17533300 | 2.62416200  | 0.39660400  |
| H | 0  | -0.51519800 | 0.65200600  | -4.56502300 |
| H | 0  | -0.98990500 | -0.01977400 | 3.99657200  |
| H | 0  | 0.46695600  | 0.60155100  | 3.93954100  |
| H | 0  | 2.24918900  | -1.66781700 | 1.80154300  |
| O | 0  | -1.74016700 | 1.26902000  | -1.38750800 |
| O | 0  | -2.57315600 | 4.06414700  | -1.09609300 |
| O | 0  | -2.21364400 | 3.90819600  | 1.64693600  |
| O | 0  | 0.11149400  | 3.45504800  | -1.47625600 |
| O | 0  | 0.65269900  | 1.82501300  | -2.89511400 |
| O | 0  | 1.78289200  | -0.53060800 | -2.46923300 |
| O | 0  | -0.06863400 | -2.32901000 | -2.76705800 |
| O | 0  | 0.54542100  | -2.57108500 | 2.00763600  |
| O | 0  | -1.41482900 | -3.63258900 | -1.55990300 |
| O | 0  | -1.10470900 | -3.76896700 | 1.10703000  |
| O | 0  | -4.12252100 | -2.99716800 | -1.20753000 |
| O | 0  | -3.76191100 | -3.12097800 | 1.47996800  |
| O | 0  | -4.57325700 | -1.39826000 | 2.64314900  |
| O | 0  | -5.09904100 | -1.20528300 | -2.11050000 |
| O | 0  | -3.43548100 | -0.57601400 | 0.19320500  |

|    |   |             |             |             |
|----|---|-------------|-------------|-------------|
| O  | 0 | -2.38408800 | -1.08779400 | -2.05202300 |
| O  | 0 | -1.05132600 | 0.06888600  | -4.01591700 |
| O  | 0 | -3.58038200 | 0.69699500  | -3.72937000 |
| O  | 0 | -0.03212300 | -0.20959100 | 3.74996700  |
| O  | 0 | -0.57821800 | -1.23122700 | -0.23624800 |
| O  | 0 | 0.64346800  | 0.93970500  | -0.26502300 |
| O  | 0 | 1.24570200  | 1.61548200  | 2.39038200  |
| O  | 0 | 2.24577300  | -0.75474400 | 1.46880800  |
| O  | 0 | 0.45999000  | 3.34385800  | 1.22394900  |
| O  | 0 | -5.70238500 | 1.05394400  | -0.82218500 |
| O  | 0 | -5.50198400 | 0.86681200  | 1.80476700  |
| O  | 0 | -3.50183600 | 1.94173700  | 0.31135200  |
| O  | 0 | -4.00043600 | 2.81800900  | -2.27160300 |
| O  | 0 | -3.47244700 | 2.57722600  | 2.92114400  |
| O  | 0 | -2.63526900 | 0.25757000  | 3.99297400  |
| O  | 0 | -1.82844700 | -1.27415300 | 2.00406500  |
| O  | 0 | -1.36984800 | 1.14081100  | 1.44483000  |
| Zr | 0 | -2.35604100 | -2.31635600 | -0.05220300 |
| Zr | 0 | -0.34910100 | -0.11747700 | -2.08530000 |
| Zr | 0 | -3.78725100 | 0.59628900  | -1.45698700 |
| Zr | 0 | -3.25021100 | 0.47572200  | 2.03469300  |
| Zr | 0 | -1.27650200 | 2.65401700  | 0.03511400  |
| Zr | 0 | 0.12810700  | -0.31196900 | 1.45645000  |
| H  | 0 | 2.10179500  | -1.28869700 | -1.86939500 |
| Al | 0 | 5.73392400  | -2.10509600 | -1.78496600 |
| Al | 0 | 5.03040900  | 0.26939800  | -2.89818600 |
| Al | 0 | 3.64531600  | -0.78887800 | 0.09517600  |
| Al | 0 | 7.06144700  | 0.26210200  | -0.28684500 |
| Al | 0 | 4.65105300  | 2.17154100  | -1.03697000 |
| Al | 0 | 6.26122400  | -2.62204600 | 0.82692700  |
| Al | 0 | 4.89760400  | 1.76115800  | 1.66325800  |
| Al | 0 | 5.78058000  | -0.60083100 | 2.51590300  |
| H  | 0 | 2.81392500  | 1.13922100  | -2.35130900 |
| H  | 0 | 5.10854800  | -4.30409800 | -0.66840600 |
| H  | 0 | 9.08327200  | 1.49567300  | -0.40057300 |
| H  | 0 | 6.71734500  | -4.50677900 | 2.28745700  |
| H  | 0 | 1.84527200  | -2.53392500 | -0.25114400 |
| H  | 0 | 5.58806600  | 3.90608900  | 0.52222100  |
| H  | 0 | 4.58172600  | 3.75248800  | -2.86182000 |
| H  | 0 | 8.06175400  | -1.18968000 | 1.90660600  |
| H  | 0 | 4.34335700  | -2.10696800 | 3.88388700  |
| H  | 0 | 5.57198400  | -2.88533400 | 3.31194000  |
| H  | 0 | 5.17503900  | 3.29056300  | 3.58171500  |
| H  | 0 | 6.41603400  | 1.39964200  | 3.73300900  |
| H  | 0 | 6.34526200  | 0.23905700  | 4.81942600  |
| H  | 0 | 7.32234600  | -0.88639100 | -3.11803400 |
| H  | 0 | 3.61839800  | -2.94831600 | -2.28901100 |
| H  | 0 | 2.38836400  | -0.55637700 | -3.26429900 |
| H  | 0 | 6.10285600  | 1.21587800  | -4.96458400 |
| H  | 0 | 4.14746900  | -2.27723000 | -3.57861900 |
| H  | 0 | 3.90555600  | -0.40038500 | -5.00083300 |
| O  | 0 | 4.50755800  | -0.85338300 | -1.50319000 |
| O  | 0 | 3.66634400  | 1.58973600  | -2.44924200 |

|    |   |             |             |             |
|----|---|-------------|-------------|-------------|
| O  | 0 | 5.74813400  | -3.58742400 | -0.71159200 |
| O  | 0 | 8.75116500  | 0.59714500  | -0.40231700 |
| O  | 0 | 6.93342500  | -1.53646000 | -0.52083500 |
| O  | 0 | 6.06706100  | 1.15230400  | -1.49160700 |
| O  | 0 | 2.62089600  | -2.18343100 | -0.70574600 |
| O  | 0 | 5.98650000  | -3.95030200 | 2.00780800  |
| O  | 0 | 5.23096900  | 3.59176700  | -2.16560800 |
| O  | 0 | 4.83352300  | -1.58054000 | 1.22592900  |
| O  | 0 | 3.79331400  | 1.10042700  | 0.25957500  |
| O  | 0 | 4.94989800  | 3.18872000  | 0.45906800  |
| O  | 0 | 6.31374900  | 0.69334400  | 1.29540100  |
| O  | 0 | 7.26888400  | -1.68858800 | 2.13798100  |
| O  | 0 | 5.30606800  | -2.05025500 | 3.81812200  |
| O  | 0 | 4.26311000  | 0.47171700  | 2.88718200  |
| O  | 0 | 5.66300500  | 2.69251600  | 3.01380800  |
| O  | 0 | 6.67150300  | 0.43594200  | 3.93316400  |
| O  | 0 | 6.40430200  | -1.17394600 | -3.19837800 |
| O  | 0 | 5.86614100  | 1.47666700  | -4.07150500 |
| O  | 0 | 4.36866300  | -3.00579900 | -2.92814300 |
| O  | 0 | 3.88033200  | -0.62810200 | -4.06765000 |
| H  | 0 | 3.41019100  | 0.10740400  | 2.57978300  |
| Ir | 0 | 7.01923100  | 3.03767200  | -3.19883300 |
| C  | 0 | 8.51443900  | 2.61039700  | -4.16910900 |
| C  | 0 | 7.87120500  | 4.51862900  | -2.53605600 |
| O  | 0 | 9.43653900  | 2.33130100  | -4.79998400 |
| O  | 0 | 8.37920200  | 5.46525600  | -2.12215800 |
| H  | 0 | -4.85797400 | -4.23817500 | 3.67084100  |
| H  | 0 | -6.19193700 | -3.04418000 | 3.66509200  |
| H  | 0 | -5.96962400 | -4.20933100 | 2.30135000  |
| H  | 0 | -5.62783300 | -4.16419900 | -2.98722300 |
| H  | 0 | -6.63799600 | -3.80683200 | -1.58715500 |
| H  | 0 | -6.80404600 | -2.80119200 | -3.06834900 |
| H  | 0 | -3.49196600 | 6.01089900  | -2.44092500 |
| H  | 0 | -4.69152900 | 5.01332800  | -3.36127500 |
| H  | 0 | -4.99087000 | 5.45232100  | -1.66756100 |
| H  | 0 | -2.77489200 | 5.69306700  | 3.37025700  |
| H  | 0 | -4.38914000 | 5.32913100  | 2.73515100  |
| H  | 0 | -3.91870100 | 4.65102100  | 4.31111400  |
| H  | 0 | 3.08636300  | 3.87505600  | 1.72946000  |
| H  | 0 | 1.97668300  | 4.69159000  | 2.83464500  |
| H  | 0 | 2.88749100  | 3.23756500  | 3.40465500  |
| H  | 0 | 1.63687300  | -4.98308700 | 1.74261900  |
| H  | 0 | 0.83284900  | -4.83437400 | 3.30676300  |
| H  | 0 | 0.06090600  | -5.80649500 | 2.00083500  |
| H  | 0 | 1.07917100  | -4.73816000 | -2.96956000 |
| H  | 0 | -0.51353300 | -5.56627400 | -2.88116500 |
| H  | 0 | -0.09484000 | -4.48259500 | -4.26096600 |
| H  | 0 | 2.32776100  | 3.41471000  | -3.86948900 |
| H  | 0 | 1.09771400  | 4.71662000  | -3.67601800 |
| H  | 0 | 2.29064500  | 4.47059800  | -2.40173600 |

**Al<sub>3</sub>-NU-1000 (C\_geminal)**

Electronic Energy: -7257.801582

Enthalpy: -7256.792482

Free Energy: -7257.008563

$\nu_{\text{CO}} = 2106, 2178 \text{ cm}^{-1}$

|   |    |             |             |             |
|---|----|-------------|-------------|-------------|
| C | -1 | 1.68444800  | 3.94340000  | -3.15512100 |
| C | -1 | 0.64900500  | -4.90821400 | 2.22466400  |
| C | -1 | 2.37166400  | 3.70494700  | 2.55373300  |
| C | -1 | 0.00185700  | -4.64437500 | -3.17737100 |
| C | -1 | -5.46152300 | -3.56982200 | 3.03745400  |
| C | -1 | -4.20580500 | 5.17837200  | -2.39073100 |
| C | -1 | -6.09808300 | -3.34300800 | -2.42691100 |
| C | -1 | -3.54710600 | 4.91457500  | 3.31258600  |
| C | -1 | 1.27405600  | 2.82442600  | 2.03808400  |
| C | -1 | 0.75414900  | 3.00362100  | -2.46954200 |
| C | -1 | -3.54119800 | 3.93046700  | -1.89895400 |
| C | -1 | -5.03723600 | -2.44266000 | -1.88258800 |
| C | -1 | -4.54349000 | -2.62143200 | 2.33674400  |
| C | -1 | -0.02842600 | -3.67127100 | 1.74594700  |
| C | -1 | -3.03319100 | 3.71324400  | 2.58679900  |
| C | -1 | -0.52889300 | -3.45025300 | -2.44888900 |
| H | 0  | -1.86477900 | -1.83934800 | 2.78869000  |
| H | 0  | 1.47112300  | 1.39538300  | -0.21535600 |
| H | 0  | -3.69403800 | 1.63852800  | -3.92355600 |
| H | 0  | -2.61998500 | 0.47082600  | -3.98130100 |
| H | 0  | -2.91537000 | 0.97981600  | 4.58085600  |
| H | 0  | -5.73154300 | 0.94859000  | 0.81969900  |
| H | 0  | -6.39228000 | 0.53125800  | -1.25430200 |
| H | 0  | -5.90083800 | 0.03215300  | 2.10242800  |
| H | 0  | -2.56648200 | -1.60491700 | -2.84047300 |
| H | 0  | -4.18020300 | 2.62503500  | 0.39305300  |
| H | 0  | -0.50542000 | 0.63748200  | -4.56021500 |
| H | 0  | -1.00298800 | -0.00800400 | 4.00961100  |
| H | 0  | 0.46292200  | 0.60141500  | 3.96952100  |
| H | 0  | 2.17464400  | -1.73138500 | 1.72713100  |
| O | 0  | -1.74659900 | 1.26723200  | -1.39027100 |
| O | 0  | -2.57417600 | 4.06353100  | -1.09554200 |
| O | 0  | -2.21616000 | 3.90788400  | 1.64576900  |
| O | 0  | 0.10664700  | 3.44683600  | -1.47628700 |
| O | 0  | 0.66007800  | 1.82492200  | -2.89996800 |
| O | 0  | 1.79133700  | -0.49748000 | -2.43491700 |
| O | 0  | -0.04575800 | -2.33202200 | -2.74597700 |
| O | 0  | 0.52901100  | -2.57226500 | 2.03715000  |
| O | 0  | -1.42326200 | -3.63330100 | -1.57010800 |
| O | 0  | -1.09428200 | -3.77038900 | 1.09028500  |
| O | 0  | -4.12503300 | -2.99579300 | -1.20315500 |
| O | 0  | -3.75625800 | -3.12089200 | 1.48470800  |
| O | 0  | -4.57946700 | -1.39780400 | 2.63966300  |
| O | 0  | -5.09673000 | -1.20594100 | -2.11515000 |
| O | 0  | -3.43714200 | -0.57563400 | 0.19464500  |
| O | 0  | -2.37857700 | -1.09176400 | -2.04730500 |
| O | 0  | -1.04505500 | 0.05849300  | -4.00995000 |

|    |   |             |             |             |
|----|---|-------------|-------------|-------------|
| O  | 0 | -3.57380200 | 0.69635300  | -3.72990200 |
| O  | 0 | -0.04543200 | -0.19951000 | 3.76257200  |
| O  | 0 | -0.57449700 | -1.22289200 | -0.22517000 |
| O  | 0 | 0.60518700  | 0.96712400  | -0.25047000 |
| O  | 0 | 1.24824600  | 1.60785300  | 2.37706700  |
| O  | 0 | 2.22073600  | -0.80380100 | 1.43990000  |
| O  | 0 | 0.45112300  | 3.33925700  | 1.22546700  |
| O  | 0 | -5.70488700 | 1.05279100  | -0.82529400 |
| O  | 0 | -5.51152000 | 0.86785500  | 1.80163300  |
| O  | 0 | -3.50788700 | 1.94109000  | 0.31090200  |
| O  | 0 | -4.00113000 | 2.81833600  | -2.27313500 |
| O  | 0 | -3.47607000 | 2.57811900  | 2.92095500  |
| O  | 0 | -2.65074500 | 0.25836800  | 3.99929500  |
| O  | 0 | -1.83244800 | -1.27196300 | 2.01098700  |
| O  | 0 | -1.38397600 | 1.14388500  | 1.45770700  |
| Zr | 0 | -2.35404600 | -2.30980800 | -0.05033200 |
| Zr | 0 | -0.34443500 | -0.11297900 | -2.07752700 |
| Zr | 0 | -3.78748000 | 0.59592100  | -1.45764400 |
| Zr | 0 | -3.26006300 | 0.47792200  | 2.03954200  |
| Zr | 0 | -1.28058700 | 2.65049800  | 0.04051900  |
| Zr | 0 | 0.12010900  | -0.30014000 | 1.47707100  |
| H  | 0 | 2.15481100  | -1.29718500 | -1.93761600 |
| Al | 0 | 5.65124200  | -1.83706500 | -2.06848900 |
| Al | 0 | 5.02624900  | 0.67299200  | -2.80373900 |
| Al | 0 | 3.61884700  | -0.80025200 | 0.09394400  |
| Al | 0 | 7.08256300  | 0.18973500  | -0.15422100 |
| Al | 0 | 4.75276500  | 2.16791800  | -0.63128000 |
| Al | 0 | 6.09487800  | -2.70059000 | 0.42406800  |
| Al | 0 | 4.97981900  | 1.48112700  | 2.00962100  |
| Al | 0 | 5.79683400  | -1.05722600 | 2.53702500  |
| H  | 0 | 2.84614800  | 1.29867200  | -1.95930600 |
| H  | 0 | 4.35248900  | -3.50292300 | -0.96509300 |
| H  | 0 | 9.21273900  | 1.20276600  | 0.08323300  |
| H  | 0 | 5.45066900  | -3.87279800 | 2.38928700  |
| H  | 0 | 1.88829300  | -2.57407500 | -0.29330100 |
| H  | 0 | 5.79422700  | 3.73068800  | 1.09544800  |
| H  | 0 | 4.55843100  | 4.29362800  | -2.04838700 |
| H  | 0 | 8.03440500  | -1.84001100 | 1.70265000  |
| H  | 0 | 4.31133600  | -2.56509700 | 3.85043100  |
| H  | 0 | 5.08425900  | 2.08059000  | 4.24229400  |
| H  | 0 | 7.00187100  | 0.19238700  | 4.31559700  |
| H  | 0 | 7.29882900  | -0.37816800 | -3.04192000 |
| H  | 0 | 3.87181800  | -3.01971100 | -3.33345500 |
| H  | 0 | 2.43016000  | -0.30252300 | -3.18065000 |
| H  | 0 | 6.44724500  | 2.01788200  | -4.19747800 |
| H  | 0 | 4.30473300  | -1.64397900 | -4.00225700 |
| H  | 0 | 3.85478500  | 0.35806400  | -4.88575100 |
| O  | 0 | 4.42803100  | -0.67816000 | -1.55948400 |
| O  | 0 | 3.64120600  | 1.84398000  | -2.03613800 |
| O  | 0 | 5.31937900  | -3.41470100 | -1.10435500 |
| O  | 0 | 8.79607200  | 0.38940600  | -0.20247200 |
| O  | 0 | 6.87678700  | -1.55615400 | -0.73372700 |
| O  | 0 | 6.12951600  | 1.23123400  | -1.24874700 |

|    |   |             |             |             |
|----|---|-------------|-------------|-------------|
| O  | 0 | 2.68257700  | -2.24114100 | -0.72785600 |
| O  | 0 | 5.65063300  | -4.31534800 | 1.51340900  |
| O  | 0 | 5.29562800  | 3.73266200  | -1.77578900 |
| O  | 0 | 4.77839100  | -1.75969700 | 1.12562800  |
| O  | 0 | 3.90291100  | 1.01117000  | 0.52829300  |
| O  | 0 | 5.19070000  | 3.01498200  | 0.88429500  |
| O  | 0 | 6.38673300  | 0.38373200  | 1.50740000  |
| O  | 0 | 7.18602000  | -2.28164400 | 1.83476400  |
| O  | 0 | 5.25411100  | -2.63998700 | 3.64787600  |
| O  | 0 | 4.37006800  | 0.03473600  | 3.08264500  |
| O  | 0 | 5.31614900  | 2.49334100  | 3.40734400  |
| O  | 0 | 6.84887600  | -0.72347400 | 4.05863800  |
| O  | 0 | 6.40286800  | -0.66219100 | -3.25982900 |
| O  | 0 | 5.58379100  | 2.10193100  | -3.78476900 |
| O  | 0 | 4.65637800  | -2.51908000 | -3.59592600 |
| O  | 0 | 3.85201700  | -0.12023200 | -4.04944300 |
| H  | 0 | 3.48338200  | -0.22563700 | 2.77401200  |
| H  | 0 | -4.85948400 | -4.22672900 | 3.68419500  |
| H  | 0 | -6.20145500 | -3.04310800 | 3.65290500  |
| H  | 0 | -5.95770500 | -4.22066700 | 2.30321300  |
| H  | 0 | -5.62782400 | -4.16723700 | -2.98272300 |
| H  | 0 | -6.64174000 | -3.80251700 | -1.58719000 |
| H  | 0 | -6.80095100 | -2.80213500 | -3.07254100 |
| H  | 0 | -3.49490100 | 6.01393600  | -2.43019400 |
| H  | 0 | -4.68174700 | 5.01610700  | -3.36664000 |
| H  | 0 | -4.99933900 | 5.44515300  | -1.67416000 |
| H  | 0 | -2.77718300 | 5.69566300  | 3.36505600  |
| H  | 0 | -4.39368700 | 5.32429800  | 2.73836100  |
| H  | 0 | -3.91283800 | 4.65203100  | 4.31354600  |
| H  | 0 | 5.53753900  | 3.22709300  | -2.63728200 |
| H  | 0 | 6.35972700  | -4.94199100 | 1.71017600  |
| Ir | 0 | 6.40600300  | -2.24542300 | 5.36214500  |
| C  | 0 | 5.87192000  | -3.71805900 | 6.33244700  |
| C  | 0 | 7.49233200  | -1.73255200 | 6.75896200  |
| O  | 0 | 5.51828100  | -4.64376400 | 6.91705400  |
| O  | 0 | 8.17064900  | -1.39679000 | 7.62280600  |
| H  | 0 | 3.09808700  | 3.85462100  | 1.73776200  |
| H  | 0 | 1.97521300  | 4.69481700  | 2.82064300  |
| H  | 0 | 2.92086900  | 3.25341500  | 3.38943800  |
| H  | 0 | 2.58183500  | 3.40799200  | -3.49677700 |
| H  | 0 | 1.17798900  | 4.36546700  | -4.03868600 |
| H  | 0 | 1.94310700  | 4.77888800  | -2.48953600 |
| H  | 0 | 0.99702200  | -4.88386900 | -2.76816000 |
| H  | 0 | -0.64773000 | -5.51957100 | -3.05005800 |
| H  | 0 | 0.13547500  | -4.40720900 | -4.24194100 |
| H  | 0 | 0.79195900  | -4.85058900 | 3.31404400  |
| H  | 0 | 0.08088600  | -5.81017000 | 1.96628500  |
| H  | 0 | 1.65382000  | -4.96312500 | 1.77547800  |

**Al<sub>2</sub>-NU-1000 (geminal)**

Electronic Energy: -7257.811525

Enthalpy: -7256.802219

Free Energy: -7257.017377

$\nu_{CO} = 2106, 2179 \text{ cm}^{-1}$

|   |    |             |             |             |
|---|----|-------------|-------------|-------------|
| C | -1 | 1.68444800  | 3.94340000  | -3.15512100 |
| C | -1 | 0.64900500  | -4.90821400 | 2.22466400  |
| C | -1 | 2.37166400  | 3.70494700  | 2.55373300  |
| C | -1 | 0.00185700  | -4.64437500 | -3.17737100 |
| C | -1 | -5.46152300 | -3.56982200 | 3.03745400  |
| C | -1 | -4.20580500 | 5.17837200  | -2.39073100 |
| C | -1 | -6.09808300 | -3.34300800 | -2.42691100 |
| C | -1 | -3.54710600 | 4.91457500  | 3.31258600  |
| C | -1 | 1.27405600  | 2.82442600  | 2.03808400  |
| C | -1 | 0.75414900  | 3.00362100  | -2.46954200 |
| C | -1 | -3.54119800 | 3.93046700  | -1.89895400 |
| C | -1 | -5.03723600 | -2.44266000 | -1.88258800 |
| C | -1 | -4.54349000 | -2.62143200 | 2.33674400  |
| C | -1 | -0.02842600 | -3.67127100 | 1.74594700  |
| C | -1 | -3.03319100 | 3.71324400  | 2.58679900  |
| C | -1 | -0.52889300 | -3.45025300 | -2.44888900 |
| H | 0  | -1.88403800 | -1.89241400 | 2.72318000  |
| H | 0  | 1.51215200  | 1.32618600  | -0.24227700 |
| H | 0  | -3.68846500 | 1.63394200  | -3.95633000 |
| H | 0  | -2.60512000 | 0.46912000  | -3.98654900 |
| H | 0  | -2.75984800 | 1.17833900  | 4.47990500  |
| H | 0  | -5.74197200 | 0.93218800  | 0.79646900  |
| H | 0  | -6.39483700 | 0.52204700  | -1.26670300 |
| H | 0  | -5.91174500 | 0.03353000  | 2.09910500  |
| H | 0  | -2.56726700 | -1.59935700 | -2.84299400 |
| H | 0  | -4.19400100 | 2.62353200  | 0.39495000  |
| H | 0  | -0.50450500 | 0.62478900  | -4.55998900 |
| H | 0  | 0.53422100  | 0.47304100  | 4.00937200  |
| H | 0  | 2.23997100  | -1.67662100 | 1.79288600  |
| O | 0  | -1.75387800 | 1.27194700  | -1.38794800 |
| O | 0  | -2.57189400 | 4.06106600  | -1.09878200 |
| O | 0  | -2.23215800 | 3.91034800  | 1.63535900  |
| O | 0  | 0.11272400  | 3.45682300  | -1.47404300 |
| O | 0  | 0.64428100  | 1.82909900  | -2.89792500 |
| O | 0  | 1.77935200  | -0.50981800 | -2.43540700 |
| O | 0  | -0.06343700 | -2.32926800 | -2.75761900 |
| O | 0  | 0.53734300  | -2.57274500 | 2.01913900  |
| O | 0  | -1.41913800 | -3.63311300 | -1.56304900 |
| O | 0  | -1.10740800 | -3.76704300 | 1.10625200  |
| O | 0  | -4.12172500 | -2.99368700 | -1.20858500 |
| O | 0  | -3.77549600 | -3.10783300 | 1.46530300  |
| O | 0  | -4.55024400 | -1.40100000 | 2.67769800  |
| O | 0  | -5.09855500 | -1.20505700 | -2.11821500 |
| O | 0  | -3.45878200 | -0.56547600 | 0.18586600  |
| O | 0  | -2.38630600 | -1.08622500 | -2.04798800 |
| O | 0  | -1.05304400 | 0.06032100  | -4.00356400 |
| O | 0  | -3.56479000 | 0.69725400  | -3.74223300 |
| O | 0  | 0.03968200  | -0.29571500 | 3.69232300  |
| O | 0  | -0.58252000 | -1.22255300 | -0.22656500 |



|    |   |             |             |             |
|----|---|-------------|-------------|-------------|
| O  | 0 | 0.60919200  | 0.96830500  | -0.24556400 |
| O  | 0 | 1.25271300  | 1.61452900  | 2.37966500  |
| O  | 0 | 2.24433600  | -0.77030500 | 1.44195000  |
| O  | 0 | 0.44821700  | 3.35032900  | 1.23728300  |
| O  | 0 | -5.71332000 | 1.05242100  | -0.83867500 |
| O  | 0 | -5.51224800 | 0.85655300  | 1.77868600  |
| O  | 0 | -3.52015000 | 1.94179600  | 0.30631800  |
| O  | 0 | -4.00488700 | 2.81927100  | -2.27348300 |
| O  | 0 | -3.45477700 | 2.56918400  | 2.93426200  |
| O  | 0 | -2.70947500 | 0.30687300  | 4.06503000  |
| O  | 0 | -1.85397600 | -1.27535900 | 1.97864700  |
| O  | 0 | -1.39702500 | 1.14414100  | 1.45014300  |
| Zr | 0 | -2.34072200 | -2.31142900 | -0.06205600 |
| Zr | 0 | -0.34556200 | -0.11844100 | -2.06808000 |
| Zr | 0 | -3.79428300 | 0.60425900  | -1.47979700 |
| Zr | 0 | -3.26389900 | 0.46711200  | 1.98121400  |
| Zr | 0 | -1.27100100 | 2.64901900  | 0.03138800  |
| Zr | 0 | 0.13347800  | -0.29759200 | 1.51059100  |
| H  | 0 | 2.09782700  | -1.28468900 | -1.85901700 |
| Al | 0 | 5.71205200  | -2.07568900 | -1.81809900 |
| Al | 0 | 5.04128200  | 0.32132500  | -2.94224500 |
| Al | 0 | 3.64896100  | -0.81138100 | 0.09311900  |
| Al | 0 | 7.07204000  | 0.23311800  | -0.25376100 |
| Al | 0 | 4.70089800  | 2.08660200  | -0.97661500 |
| Al | 0 | 6.25393300  | -2.64945100 | 0.78677500  |
| Al | 0 | 4.89397100  | 1.71947600  | 1.70165100  |
| Al | 0 | 5.77257900  | -0.66003900 | 2.53521300  |
| H  | 0 | 2.83217800  | 1.13027000  | -2.24235600 |
| H  | 0 | 5.07287400  | -4.29046000 | -0.73814800 |
| H  | 0 | 9.15098100  | 1.37065300  | -0.12551100 |
| H  | 0 | 5.55878800  | -2.97710300 | 3.25420900  |
| H  | 0 | 1.87237100  | -2.56551300 | -0.26449400 |
| H  | 0 | 5.66229100  | 3.83992900  | 0.55410900  |
| H  | 0 | 4.58640900  | 4.00283500  | -2.67819300 |
| H  | 0 | 8.05317000  | -1.22587000 | 1.75958800  |
| H  | 0 | 4.43000700  | -2.18023900 | 4.02668100  |
| H  | 0 | 5.06166500  | 3.10387800  | 3.70391400  |
| H  | 0 | 7.31720500  | -0.87475300 | -3.13757200 |
| H  | 0 | 3.60480300  | -2.92412200 | -2.32305900 |
| H  | 0 | 6.53794700  | 1.44457300  | -4.44446300 |
| H  | 0 | 4.11543900  | -2.21232100 | -3.60225400 |
| H  | 0 | 3.86607200  | -0.29043700 | -4.95287400 |
| O  | 0 | 4.50877600  | -0.81211600 | -1.50733500 |
| O  | 0 | 3.65540000  | 1.62640800  | -2.36552900 |
| O  | 0 | 5.71860100  | -3.57872800 | -0.76600600 |
| O  | 0 | 8.78446200  | 0.48948400  | -0.20299900 |
| O  | 0 | 6.93118600  | -1.55455600 | -0.54415200 |
| O  | 0 | 6.12950500  | 1.14708700  | -1.45341000 |
| O  | 0 | 2.64118800  | -2.20706300 | -0.72412000 |
| O  | 0 | 6.01173300  | -4.00082400 | 1.94137900  |
| O  | 0 | 5.32351400  | 3.51888900  | -2.28351300 |
| O  | 0 | 4.83644700  | -1.61153500 | 1.21714600  |
| O  | 0 | 3.80979700  | 1.07474000  | 0.30750000  |

|    |   |             |             |             |
|----|---|-------------|-------------|-------------|
| O  | 0 | 4.97945700  | 3.16781900  | 0.46287400  |
| O  | 0 | 6.31368300  | 0.66350100  | 1.32676300  |
| O  | 0 | 7.29169500  | -1.71075400 | 2.10505900  |
| O  | 0 | 5.36496300  | -2.14308200 | 3.78941600  |
| O  | 0 | 4.27361100  | 0.41629200  | 2.92137300  |
| O  | 0 | 5.61910400  | 2.67348200  | 3.05249700  |
| O  | 0 | 6.65143100  | 0.38563700  | 3.97198900  |
| O  | 0 | 6.39234300  | -1.13281500 | -3.22476900 |
| O  | 0 | 5.65990200  | 1.59019300  | -4.08388200 |
| O  | 0 | 4.35109600  | -2.95596800 | -2.96823000 |
| O  | 0 | 3.82238600  | -0.59018300 | -4.03909000 |
| H  | 0 | 3.41954300  | 0.05347100  | 2.61661800  |
| H  | 0 | -4.95599700 | -3.92439000 | 3.95093800  |
| H  | 0 | -6.38786200 | -3.07090700 | 3.35307100  |
| H  | 0 | -5.67594700 | -4.44257300 | 2.40796400  |
| H  | 0 | -5.62683500 | -4.14506200 | -3.01385600 |
| H  | 0 | -6.61764300 | -3.83347600 | -1.58968400 |
| H  | 0 | -6.81994000 | -2.79651000 | -3.04624600 |
| H  | 0 | -3.50293200 | 6.02137300  | -2.40359000 |
| H  | 0 | -4.65627600 | 5.02276200  | -3.37983900 |
| H  | 0 | -5.02105800 | 5.42709400  | -1.69228400 |
| H  | 0 | -2.79503400 | 5.71413700  | 3.32022100  |
| H  | 0 | -4.42759500 | 5.29157400  | 2.76765600  |
| H  | 0 | -3.86757900 | 4.66212400  | 4.33175900  |
| H  | 0 | 5.60733000  | 2.89424900  | -3.04026000 |
| H  | 0 | 6.75497500  | -4.54001200 | 2.22162700  |
| H  | 0 | 3.10376400  | 3.85430600  | 1.74050700  |
| H  | 0 | 1.98201700  | 4.69893800  | 2.81448200  |
| H  | 0 | 2.86843000  | 3.24521600  | 3.41965600  |
| H  | 0 | 2.44397700  | 3.38900200  | -3.72266000 |
| H  | 0 | 1.10662400  | 4.57964300  | -3.84495600 |
| H  | 0 | 2.14409100  | 4.61498900  | -2.41411600 |
| H  | 0 | 1.07261200  | -4.75319700 | -2.94402500 |
| H  | 0 | -0.53125000 | -5.56217600 | -2.90052900 |
| H  | 0 | -0.06608200 | -4.47142100 | -4.26127600 |
| H  | 0 | 0.75640700  | -4.86400600 | 3.31934000  |
| H  | 0 | 0.09757900  | -5.81212000 | 1.93871400  |
| H  | 0 | 1.66928100  | -4.94413700 | 1.81130100  |
| H  | 0 | 7.61105600  | 0.38473600  | 3.86923300  |
| H  | 0 | 6.35582700  | 1.33579200  | 3.78555400  |
| Ir | 0 | -1.40517200 | -1.04421900 | 4.98636400  |
| C  | 0 | -2.76726300 | -1.70718400 | 6.04253100  |
| C  | 0 | -0.19591500 | -2.24970500 | 5.67769700  |
| O  | 0 | 0.58214200  | -3.00038600 | 6.06624900  |
| O  | 0 | -3.63425200 | -2.11837000 | 6.67326400  |
| H  | 0 | 2.40036700  | -0.51193500 | -3.23109500 |

### Al<sub>8</sub>-NU-1000 (opposite)

Electronic Energy: -7257.812846

Enthalpy: -7256.802919

Free Energy: -7257.016662

$\nu_{\text{CO}} = 2106, 2180 \text{ cm}^{-1}$

|   |    |             |             |             |
|---|----|-------------|-------------|-------------|
| C | -1 | 1.68444800  | 3.94340000  | -3.15512100 |
| C | -1 | 0.64900500  | -4.90821400 | 2.22466400  |
| C | -1 | 2.37166400  | 3.70494700  | 2.55373300  |
| C | -1 | 0.00185700  | -4.64437500 | -3.17737100 |
| C | -1 | -5.46152300 | -3.56982200 | 3.03745400  |
| C | -1 | -4.20580500 | 5.17837200  | -2.39073100 |
| C | -1 | -6.09808300 | -3.34300800 | -2.42691100 |
| C | -1 | -3.54710600 | 4.91457500  | 3.31258600  |
| C | -1 | 1.27405600  | 2.82442600  | 2.03808400  |
| C | -1 | 0.75414900  | 3.00362100  | -2.46954200 |
| C | -1 | -3.54119800 | 3.93046700  | -1.89895400 |
| C | -1 | -5.03723600 | -2.44266000 | -1.88258800 |
| C | -1 | -4.54349000 | -2.62143200 | 2.33674400  |
| C | -1 | -0.02842600 | -3.67127100 | 1.74594700  |
| C | -1 | -3.03319100 | 3.71324400  | 2.58679900  |
| C | -1 | -0.52889300 | -3.45025300 | -2.44888900 |
| H | 0  | -1.87185000 | -1.84785700 | 2.77076900  |
| H | 0  | 1.52895800  | 1.31363300  | -0.24663500 |
| H | 0  | -3.70148900 | 1.63563400  | -3.94734300 |
| H | 0  | -2.60071200 | 0.48394800  | -3.99328400 |
| H | 0  | -2.92689000 | 0.95126100  | 4.58805600  |
| H | 0  | -6.34290300 | 0.29146000  | -1.16139200 |
| H | 0  | -5.91036500 | 0.10433900  | 2.18153300  |
| H | 0  | -2.57163600 | -1.59535000 | -2.85851400 |
| H | 0  | -4.10792700 | 2.66839000  | 0.39250000  |
| H | 0  | -0.49623900 | 0.63266400  | -4.57563000 |
| H | 0  | -1.01597200 | -0.01504700 | 3.99127400  |
| H | 0  | 0.45301700  | 0.58672300  | 3.96147300  |
| H | 0  | 2.23048500  | -1.66659100 | 1.81933200  |
| O | 0  | -1.73943500 | 1.26238200  | -1.40826000 |
| O | 0  | -2.55303000 | 4.05727700  | -1.12537400 |
| O | 0  | -2.22000700 | 3.90814600  | 1.63755800  |
| O | 0  | 0.11734400  | 3.44946900  | -1.47067300 |
| O | 0  | 0.64661800  | 1.82937700  | -2.90524500 |
| O | 0  | 1.79271500  | -0.51818100 | -2.45082100 |
| O | 0  | -0.06219500 | -2.32976400 | -2.76362700 |
| O | 0  | 0.53790100  | -2.57016800 | 2.01297000  |
| O | 0  | -1.41627100 | -3.63106500 | -1.56222800 |
| O | 0  | -1.10336500 | -3.77102300 | 1.10276200  |
| O | 0  | -4.11058500 | -2.99909700 | -1.23156400 |
| O | 0  | -3.77607500 | -3.11949200 | 1.46307600  |
| O | 0  | -4.56392700 | -1.40381500 | 2.65157100  |
| O | 0  | -5.11274400 | -1.19716300 | -2.08490000 |
| O | 0  | -3.43614700 | -0.57297700 | 0.17510100  |
| O | 0  | -2.37960400 | -1.08618200 | -2.06361500 |
| O | 0  | -1.04159500 | 0.06136100  | -4.02279700 |
| O | 0  | -3.55607700 | 0.70267800  | -3.73130500 |
| O | 0  | -0.05518000 | -0.21216300 | 3.74912900  |
| O | 0  | -0.57992100 | -1.22845400 | -0.24099700 |
| O | 0  | 0.62742400  | 0.95150800  | -0.26328100 |

|    |   |             |             |             |
|----|---|-------------|-------------|-------------|
| O  | 0 | 1.24171900  | 1.61763500  | 2.39190900  |
| O  | 0 | 2.23521000  | -0.75488900 | 1.48272100  |
| O  | 0 | 0.46071900  | 3.34739900  | 1.22426600  |
| O  | 0 | -5.77981300 | 1.03072800  | -0.89525300 |
| O  | 0 | -5.43752200 | 0.90395600  | 1.91326900  |
| O  | 0 | -3.47517800 | 1.94436000  | 0.29266100  |
| O  | 0 | -4.03705500 | 2.81635600  | -2.23697700 |
| O  | 0 | -3.47109600 | 2.58177200  | 2.92481500  |
| O  | 0 | -2.63980000 | 0.25328100  | 3.98918900  |
| O  | 0 | -1.84241600 | -1.27843100 | 1.99447100  |
| O  | 0 | -1.37653300 | 1.13929700  | 1.44317900  |
| Zr | 0 | -2.35201200 | -2.31691500 | -0.05045700 |
| Zr | 0 | -0.33014500 | -0.12581900 | -2.09375500 |
| Zr | 0 | -3.73324700 | 0.59878700  | -1.46119300 |
| Zr | 0 | -3.30095000 | 0.47086800  | 2.04275000  |
| Zr | 0 | -1.26630100 | 2.64316900  | 0.04746900  |
| Zr | 0 | 0.11283700  | -0.30681600 | 1.46425200  |
| H  | 0 | 2.11037300  | -1.27869200 | -1.85630300 |
| Al | 0 | 5.71772500  | -2.07396700 | -1.77623300 |
| Al | 0 | 5.05489600  | 0.31687300  | -2.91632100 |
| Al | 0 | 3.64611500  | -0.79834100 | 0.12279300  |
| Al | 0 | 7.07107600  | 0.24398100  | -0.22245800 |
| Al | 0 | 4.69736600  | 2.09145300  | -0.96368300 |
| Al | 0 | 6.24971200  | -2.63268400 | 0.83367800  |
| Al | 0 | 4.88771800  | 1.74146300  | 1.71810800  |
| Al | 0 | 5.76470400  | -0.63230600 | 2.56830000  |
| H  | 0 | 2.83526100  | 1.12611700  | -2.24109000 |
| H  | 0 | 5.07461900  | -4.28466000 | -0.68641900 |
| H  | 0 | 9.14976900  | 1.38295800  | -0.09773500 |
| H  | 0 | 5.54904800  | -2.94488100 | 3.29960900  |
| H  | 0 | 1.85810100  | -2.53895400 | -0.23701500 |
| H  | 0 | 5.65631000  | 3.85313100  | 0.55673200  |
| H  | 0 | 4.58984900  | 4.00102800  | -2.67385300 |
| H  | 0 | 8.04679300  | -1.20456000 | 1.80305400  |
| H  | 0 | 4.41268300  | -2.14162500 | 4.05226600  |
| H  | 0 | 5.06182800  | 3.15365400  | 3.70355900  |
| H  | 0 | 7.33194900  | -0.88186900 | -3.09302700 |
| H  | 0 | 3.61321300  | -2.92526400 | -2.29603300 |
| H  | 0 | 6.55799700  | 1.43731400  | -4.41493400 |
| H  | 0 | 4.13727800  | -2.22130900 | -3.57391200 |
| H  | 0 | 3.90334100  | -0.30693500 | -4.93603000 |
| O  | 0 | 4.51165000  | -0.81064000 | -1.47767100 |
| O  | 0 | 3.66082100  | 1.62049100  | -2.35550200 |
| O  | 0 | 5.71724500  | -3.57025100 | -0.71498000 |
| O  | 0 | 8.78296100  | 0.50156700  | -0.17130900 |
| O  | 0 | 6.93155700  | -1.54587500 | -0.50079900 |
| O  | 0 | 6.12949900  | 1.15053500  | -1.42853600 |
| O  | 0 | 2.63152500  | -2.18428500 | -0.69187300 |
| O  | 0 | 6.00497100  | -3.97754900 | 1.99548400  |
| O  | 0 | 5.32420000  | 3.51714000  | -2.27399300 |
| O  | 0 | 4.83042300  | -1.59277800 | 1.25355000  |
| O  | 0 | 3.80256100  | 1.08694600  | 0.32518300  |
| O  | 0 | 4.97349400  | 3.18029800  | 0.47038300  |

|    |   |             |             |             |
|----|---|-------------|-------------|-------------|
| O  | 0 | 6.30734900  | 0.68263300  | 1.35224700  |
| O  | 0 | 7.28384700  | -1.68646000 | 2.14942900  |
| O  | 0 | 5.35116100  | -2.10821500 | 3.82933400  |
| O  | 0 | 4.26468400  | 0.44542600  | 2.94260100  |
| O  | 0 | 5.61478400  | 2.70154400  | 3.06326700  |
| O  | 0 | 6.63914600  | 0.42113700  | 4.00094800  |
| O  | 0 | 6.40690400  | -1.13827300 | -3.18334500 |
| O  | 0 | 5.67653700  | 1.58087900  | -4.06190800 |
| O  | 0 | 4.36572200  | -2.96116300 | -2.93257100 |
| O  | 0 | 3.84871900  | -0.60306200 | -4.02158400 |
| H  | 0 | 3.41208700  | 0.07914300  | 2.63698900  |
| H  | 0 | -4.85738300 | -4.30568100 | 3.58966000  |
| H  | 0 | -6.13158700 | -3.05069800 | 3.73380300  |
| H  | 0 | -6.04217500 | -4.13725400 | 2.29523100  |
| H  | 0 | -5.62728800 | -4.15157500 | -3.00466700 |
| H  | 0 | -6.62250500 | -3.82364800 | -1.58683900 |
| H  | 0 | -6.81717100 | -2.79951500 | -3.05229600 |
| H  | 0 | -3.48635000 | 6.00422600  | -2.46500500 |
| H  | 0 | -4.71694900 | 5.00899800  | -3.34751000 |
| H  | 0 | -4.97113000 | 5.46686100  | -1.65142900 |
| H  | 0 | -2.79258800 | 5.71183000  | 3.33578900  |
| H  | 0 | -4.41891100 | 5.29954800  | 2.75797700  |
| H  | 0 | -3.88331200 | 4.65598000  | 4.32512300  |
| H  | 0 | 5.61242500  | 2.88997000  | -3.02722500 |
| H  | 0 | 6.74871800  | -4.51300600 | 2.28161900  |
| H  | 0 | 3.10295700  | 3.85605700  | 1.74026400  |
| H  | 0 | 1.98084300  | 4.69887700  | 2.81345100  |
| H  | 0 | 2.86736300  | 3.24685200  | 3.42117500  |
| H  | 0 | 2.45544300  | 3.38724000  | -3.70545200 |
| H  | 0 | 1.11094800  | 4.56293900  | -3.86356100 |
| H  | 0 | 2.12821600  | 4.63026600  | -2.41863400 |
| H  | 0 | 1.07457000  | -4.74962200 | -2.95174300 |
| H  | 0 | -0.52650400 | -5.56325600 | -2.89498400 |
| H  | 0 | -0.07423200 | -4.47459800 | -4.26129200 |
| H  | 0 | 0.81756400  | -4.84018000 | 3.30967100  |
| H  | 0 | 0.06794200  | -5.80768500 | 1.98777600  |
| H  | 0 | 1.64388600  | -4.97529400 | 1.75612400  |
| H  | 0 | 7.59926000  | 0.41989700  | 3.90303100  |
| H  | 0 | 6.34398000  | 1.37065000  | 3.80899500  |
| Ir | 0 | -6.50969100 | 2.18907000  | 0.68123300  |
| C  | 0 | -7.04823800 | 3.19357800  | 2.13171100  |
| C  | 0 | -7.38333300 | 3.31625300  | -0.49075500 |
| O  | 0 | -7.35556700 | 3.81484900  | 3.04710000  |
| O  | 0 | -7.90628600 | 4.01413000  | -1.23832000 |
| H  | 0 | 2.42680400  | -0.52363300 | -3.23755100 |

**Table S8.** XYZ Cartesian Coordinates of Selected Optimized Al<sub>8</sub>-NU-1000 Isomers at the M06-2X Density Functional.

**Al<sub>8</sub>-NU-1000 (A)**

Electronic Energy: -7257.879044

Enthalpy: -7256.870762

Free Energy: -7257.082930

$\nu_{CO} = 2157, 2245 \text{ cm}^{-1}$

|   |    |             |             |             |
|---|----|-------------|-------------|-------------|
| C | -1 | 1.68444800  | 3.94340000  | -3.15512100 |
| C | -1 | 0.64900500  | -4.90821400 | 2.22466400  |
| C | -1 | 2.37166400  | 3.70494700  | 2.55373300  |
| C | -1 | 0.00185700  | -4.64437500 | -3.17737100 |
| C | -1 | -5.46152300 | -3.56982200 | 3.03745400  |
| C | -1 | -4.20580500 | 5.17837200  | -2.39073100 |
| C | -1 | -6.09808300 | -3.34300800 | -2.42691100 |
| C | -1 | -3.54710600 | 4.91457500  | 3.31258600  |
| C | -1 | 1.27405600  | 2.82442600  | 2.03808400  |
| C | -1 | 0.75414900  | 3.00362100  | -2.46954200 |
| C | -1 | -3.54119800 | 3.93046700  | -1.89895400 |
| C | -1 | -5.03723600 | -2.44266000 | -1.88258800 |
| C | -1 | -4.54349000 | -2.62143200 | 2.33674400  |
| C | -1 | -0.02842600 | -3.67127100 | 1.74594700  |
| C | -1 | -3.03319100 | 3.71324400  | 2.58679900  |
| C | -1 | -0.52889300 | -3.45025300 | -2.44888900 |
| H | 0  | -1.88034600 | -1.86597400 | 2.76732400  |
| H | 0  | 1.52518200  | 1.34254700  | -0.21072700 |
| H | 0  | -3.64532800 | 1.57746300  | -3.98306100 |
| H | 0  | -2.48547700 | 0.43407000  | -3.92137300 |
| H | 0  | -2.82116000 | 1.01849400  | 4.52749300  |
| H | 0  | -5.66373600 | 0.94430400  | 0.68087700  |
| H | 0  | -6.36220100 | 0.46357000  | -1.17758700 |
| H | 0  | -5.94921500 | 0.10087200  | 2.04120200  |
| H | 0  | -2.56115500 | -1.61694000 | -2.84071500 |
| H | 0  | -4.17144300 | 2.63440800  | 0.38418200  |
| H | 0  | -0.56008600 | 0.69704100  | -4.51778700 |
| H | 0  | -1.15761300 | -0.01862700 | 3.92807500  |
| H | 0  | 0.34200700  | 0.56447800  | 4.02830300  |
| H | 0  | 2.30074200  | -1.60485400 | 1.89444800  |
| O | 0  | -1.73729200 | 1.26219800  | -1.38956800 |
| O | 0  | -2.55871800 | 4.05853300  | -1.11109600 |
| O | 0  | -2.21712600 | 3.90460400  | 1.64170200  |
| O | 0  | 0.12502200  | 3.44501300  | -1.46098800 |
| O | 0  | 0.62906400  | 1.83159300  | -2.90353300 |
| O | 0  | 1.76642300  | -0.52705800 | -2.46457600 |
| O | 0  | -0.07405200 | -2.32511300 | -2.75946900 |
| O | 0  | 0.54717800  | -2.56460800 | 1.98120500  |
| O | 0  | -1.40388400 | -3.63487400 | -1.54889600 |
| O | 0  | -1.11304400 | -3.76582300 | 1.11821800  |
| O | 0  | -4.11726700 | -2.99566900 | -1.21305600 |
| O | 0  | -3.77322900 | -3.11655500 | 1.46604300  |

|    |   |             |             |             |
|----|---|-------------|-------------|-------------|
| O  | 0 | -4.55746100 | -1.39903300 | 2.64759400  |
| O  | 0 | -5.09296000 | -1.20349600 | -2.10694500 |
| O  | 0 | -3.43475700 | -0.57345900 | 0.18185400  |
| O  | 0 | -2.37383600 | -1.10575800 | -2.04544000 |
| O  | 0 | -1.08032400 | 0.07471600  | -3.99553300 |
| O  | 0 | -3.49011100 | 0.66666000  | -3.69835500 |
| O  | 0 | -0.15006800 | -0.21008500 | 3.72172700  |
| O  | 0 | -0.57421000 | -1.22570400 | -0.22909400 |
| O  | 0 | 0.63623400  | 0.95371400  | -0.24636400 |
| O  | 0 | 1.25069300  | 1.61533800  | 2.38608600  |
| O  | 0 | 2.23225100  | -0.70032500 | 1.54324800  |
| O  | 0 | 0.45224600  | 3.34240800  | 1.23116700  |
| O  | 0 | -5.69169900 | 1.03456100  | -0.78482100 |
| O  | 0 | -5.47332500 | 0.87533700  | 1.71153800  |
| O  | 0 | -3.49687900 | 1.95237200  | 0.29684800  |
| O  | 0 | -4.01136200 | 2.81575400  | -2.25121800 |
| O  | 0 | -3.47163700 | 2.57461700  | 2.91458600  |
| O  | 0 | -2.61267700 | 0.25701500  | 3.97361300  |
| O  | 0 | -1.85046200 | -1.29036400 | 1.99501600  |
| O  | 0 | -1.38732900 | 1.14105800  | 1.44810100  |
| Zr | 0 | -2.35543200 | -2.31825200 | -0.05129300 |
| Zr | 0 | -0.33578400 | -0.12971100 | -2.05597100 |
| Zr | 0 | -3.76145700 | 0.60129600  | -1.47839300 |
| Zr | 0 | -3.28149900 | 0.46621300  | 2.00716500  |
| Zr | 0 | -1.27901000 | 2.64929200  | 0.03704300  |
| Zr | 0 | 0.09952600  | -0.29949100 | 1.48867300  |
| H  | 0 | 2.08705000  | -1.30129900 | -1.82905000 |
| Al | 0 | 5.60010700  | -1.95545200 | -1.95282800 |
| Al | 0 | 4.97267700  | 0.48470300  | -2.89300200 |
| Al | 0 | 3.56262500  | -0.75905800 | 0.06581600  |
| Al | 0 | 6.94741600  | 0.21525000  | -0.25664800 |
| Al | 0 | 4.58432300  | 2.20167000  | -0.96000600 |
| Al | 0 | 6.07398300  | -2.70772800 | 0.64049400  |
| Al | 0 | 4.83162400  | 1.75111900  | 1.68488700  |
| Al | 0 | 5.66101400  | -0.72314900 | 2.51886400  |
| H  | 0 | 2.74241600  | 1.12321300  | -2.20140600 |
| H  | 0 | 4.19167600  | -3.49202200 | -0.77800000 |
| H  | 0 | 9.00464000  | 1.37762100  | -0.15113300 |
| H  | 0 | 1.66443500  | -2.35019300 | -0.18991600 |
| H  | 0 | 5.62655400  | 3.87076300  | 0.57725300  |
| H  | 0 | 4.44160700  | 4.14389300  | -2.53437700 |
| H  | 0 | 7.91914000  | -1.44938200 | 1.84018900  |
| H  | 0 | 4.60871400  | -2.54472800 | 3.78210700  |
| H  | 0 | 5.13751100  | 3.20049300  | 3.68463200  |
| H  | 0 | 6.25170900  | 1.39946000  | 3.69671200  |
| H  | 0 | 7.27745400  | -0.50421900 | -2.96400100 |
| H  | 0 | 4.02137500  | -3.29442500 | -3.30410200 |
| H  | 0 | 2.38331100  | -0.49903600 | -3.24238000 |
| H  | 0 | 6.44486900  | 1.83909800  | -4.25738200 |
| H  | 0 | 4.34357500  | -1.81833000 | -3.94353600 |
| H  | 0 | 3.91940800  | -0.06847300 | -5.01304400 |
| O  | 0 | 4.36189900  | -0.73997100 | -1.57443700 |
| O  | 0 | 3.52453100  | 1.68228400  | -2.33269900 |

|    |   |             |             |             |
|----|---|-------------|-------------|-------------|
| O  | 0 | 5.14565500  | -3.37345200 | -0.90678800 |
| O  | 0 | 8.65836100  | 0.48935800  | -0.25350700 |
| O  | 0 | 6.80359800  | -1.56352700 | -0.61856000 |
| O  | 0 | 6.01071000  | 1.22461500  | -1.40186900 |
| O  | 0 | 2.45963700  | -2.07931500 | -0.66709600 |
| O  | 0 | 6.35329000  | -4.29452400 | 1.28585500  |
| O  | 0 | 5.15413000  | 3.58785100  | -2.19544700 |
| O  | 0 | 4.69780000  | -1.62577700 | 1.20459800  |
| O  | 0 | 3.71576500  | 1.12980900  | 0.31612500  |
| O  | 0 | 4.91967200  | 3.21875400  | 0.52372300  |
| O  | 0 | 6.18520000  | 0.62167500  | 1.32687700  |
| O  | 0 | 7.07101000  | -1.82891400 | 2.10276600  |
| O  | 0 | 4.94025400  | -1.66264900 | 3.98454900  |
| O  | 0 | 4.05055900  | 0.48863600  | 2.87830900  |
| O  | 0 | 5.60049300  | 2.61260800  | 3.08357600  |
| O  | 0 | 6.47847100  | 0.41488400  | 3.93224100  |
| O  | 0 | 6.38744000  | -0.79964700 | -3.19165800 |
| O  | 0 | 5.53330900  | 1.90147500  | -3.95392500 |
| O  | 0 | 4.74681200  | -2.69155800 | -3.50888700 |
| O  | 0 | 3.87946500  | -0.43840800 | -4.12384200 |
| H  | 0 | 3.23762200  | 0.12730200  | 2.39086800  |
| H  | 0 | -4.85329900 | -4.24200700 | 3.65873300  |
| H  | 0 | -6.17884500 | -3.03801000 | 3.67024400  |
| H  | 0 | -5.97630000 | -4.19309000 | 2.29572800  |
| H  | 0 | -5.62280800 | -4.12274800 | -3.03625500 |
| H  | 0 | -6.59524500 | -3.84929200 | -1.58850600 |
| H  | 0 | -6.82800600 | -2.78630300 | -3.02251100 |
| H  | 0 | -3.48871300 | 6.00476100  | -2.43588000 |
| H  | 0 | -4.68161200 | 5.00648700  | -3.36211900 |
| H  | 0 | -4.99284500 | 5.44301900  | -1.66898100 |
| H  | 0 | -2.79707700 | 5.71246400  | 3.31095000  |
| H  | 0 | -4.43417700 | 5.27683600  | 2.77189100  |
| H  | 0 | -3.85213600 | 4.65379500  | 4.33159700  |
| H  | 0 | 5.40597000  | 2.92289100  | -3.05017400 |
| H  | 0 | 6.91277200  | -4.30382000 | 2.06633700  |
| Ir | 0 | 3.64810000  | -0.25305800 | 4.83753700  |
| C  | 0 | 3.35990500  | -1.06372600 | 6.44086600  |
| C  | 0 | 2.48740800  | 1.05419400  | 5.31821200  |
| O  | 0 | 3.17708400  | -1.57208400 | 7.44420700  |
| O  | 0 | 1.71348500  | 1.85978300  | 5.57054300  |
| H  | 0 | 7.43462700  | 0.32477000  | 4.01739800  |
| H  | 0 | 2.44969100  | 3.38577200  | -3.70460300 |
| H  | 0 | 1.10108200  | 4.56345400  | -3.85260100 |
| H  | 0 | 2.12504100  | 4.62096200  | -2.41212900 |
| H  | 0 | 3.04494100  | 3.94429600  | 1.71777400  |
| H  | 0 | 1.95357100  | 4.65190100  | 2.91827300  |
| H  | 0 | 2.92248600  | 3.20132800  | 3.35711700  |
| H  | 0 | 0.92405400  | -4.96625000 | -2.67027300 |
| H  | 0 | -0.71453400 | -5.47199500 | -3.14607300 |
| H  | 0 | 0.25408300  | -4.37245500 | -4.20813500 |
| H  | 0 | 0.90299400  | -4.79892600 | 3.28675100  |
| H  | 0 | 0.02147300  | -5.78989000 | 2.06423400  |
| H  | 0 | 1.59494100  | -5.02076900 | 1.67510500  |



**Al<sub>8</sub>-NU-1000 (A\_2)**

Electronic Energy: -7257.879302

Enthalpy: -7256.868591

Free Energy: -7257.082300

ν<sub>CO</sub> = 2171, 2256 cm<sup>-1</sup>

|   |    |             |             |             |
|---|----|-------------|-------------|-------------|
| C | -1 | 1.68444800  | 3.94340000  | -3.15512100 |
| C | -1 | 0.64900500  | -4.90821400 | 2.22466400  |
| C | -1 | 2.37166400  | 3.70494700  | 2.55373300  |
| C | -1 | 0.00185700  | -4.64437500 | -3.17737100 |
| C | -1 | -5.46152300 | -3.56982200 | 3.03745400  |
| C | -1 | -4.20580500 | 5.17837200  | -2.39073100 |
| C | -1 | -6.09808300 | -3.34300800 | -2.42691100 |
| C | -1 | -3.54710600 | 4.91457500  | 3.31258600  |
| C | -1 | 1.27405600  | 2.82442600  | 2.03808400  |
| C | -1 | 0.75414900  | 3.00362100  | -2.46954200 |
| C | -1 | -3.54119800 | 3.93046700  | -1.89895400 |
| C | -1 | -5.03723600 | -2.44266000 | -1.88258800 |
| C | -1 | -4.54349000 | -2.62143200 | 2.33674400  |
| C | -1 | -0.02842600 | -3.67127100 | 1.74594700  |
| C | -1 | -3.03319100 | 3.71324400  | 2.58679900  |
| C | -1 | -0.52889300 | -3.45025300 | -2.44888900 |
| H | 0  | -1.86728000 | -1.85386100 | 2.77427600  |
| H | 0  | 1.47511000  | 1.41420600  | -0.20393500 |
| H | 0  | -3.64682200 | 1.57856700  | -3.97669800 |
| H | 0  | -2.48999700 | 0.43515100  | -3.91692400 |
| H | 0  | -2.79971500 | 1.02334700  | 4.53199800  |
| H | 0  | -5.66315700 | 0.94358600  | 0.69392500  |
| H | 0  | -6.36652000 | 0.46375500  | -1.16995200 |
| H | 0  | -5.94275900 | 0.09490100  | 2.04963000  |
| H | 0  | -2.56295200 | -1.61944500 | -2.83306300 |
| H | 0  | -4.17498700 | 2.63544700  | 0.39070500  |
| H | 0  | -0.56294300 | 0.70864400  | -4.50746100 |
| H | 0  | -1.12313300 | -0.00149200 | 3.93462300  |
| H | 0  | 0.41431100  | 0.52427400  | 4.03962000  |
| H | 0  | 2.16097300  | -1.71759200 | 1.72566500  |
| O | 0  | -1.74660300 | 1.26579500  | -1.38942400 |
| O | 0  | -2.56069800 | 4.05916600  | -1.11052600 |
| O | 0  | -2.22339800 | 3.90703900  | 1.63828600  |
| O | 0  | 0.11026100  | 3.44457600  | -1.47250300 |
| O | 0  | 0.64924100  | 1.82423600  | -2.89607500 |
| O | 0  | 1.75962300  | -0.50106400 | -2.38825300 |
| O | 0  | -0.06256800 | -2.32722800 | -2.75350300 |
| O | 0  | 0.53859100  | -2.56944600 | 2.00783300  |
| O | 0  | -1.40863600 | -3.63249300 | -1.55428800 |
| O | 0  | -1.10477800 | -3.76663500 | 1.10726200  |
| O | 0  | -4.11716200 | -2.99411100 | -1.21160400 |
| O | 0  | -3.77054600 | -3.11475100 | 1.46686200  |
| O | 0  | -4.55289700 | -1.40067700 | 2.65444400  |
| O | 0  | -5.09479600 | -1.20314000 | -2.10524200 |
| O | 0  | -3.43366000 | -0.57095000 | 0.18732800  |
| O | 0  | -2.37484700 | -1.10556300 | -2.03982500 |
| O | 0  | -1.07896900 | 0.07702500  | -3.99232100 |
| O | 0  | -3.49355100 | 0.66622500  | -3.69541700 |
| O | 0  | -0.12137900 | -0.21692900 | 3.72218300  |

|    |   |             |             |             |
|----|---|-------------|-------------|-------------|
| O  | 0 | -0.56303500 | -1.22064300 | -0.22511800 |
| O  | 0 | 0.60692400  | 0.98845200  | -0.24279400 |
| O  | 0 | 1.25721700  | 1.60349400  | 2.35867900  |
| O  | 0 | 2.21581100  | -0.78322100 | 1.46605400  |
| O  | 0 | 0.43845600  | 3.33770700  | 1.23477400  |
| O  | 0 | -5.69568000 | 1.03407500  | -0.77684500 |
| O  | 0 | -5.47107800 | 0.87302500  | 1.72254700  |
| O  | 0 | -3.50089300 | 1.95318600  | 0.30156500  |
| O  | 0 | -4.01350700 | 2.81541700  | -2.25028200 |
| O  | 0 | -3.46701600 | 2.57343300  | 2.91873100  |
| O  | 0 | -2.58437400 | 0.26404700  | 3.97769100  |
| O  | 0 | -1.84108700 | -1.28472100 | 1.99706500  |
| O  | 0 | -1.39145100 | 1.14582900  | 1.45303700  |
| Zr | 0 | -2.35285900 | -2.30746100 | -0.04910400 |
| Zr | 0 | -0.34450100 | -0.11877800 | -2.04629100 |
| Zr | 0 | -3.76665700 | 0.60554200  | -1.47322800 |
| Zr | 0 | -3.27516800 | 0.46966400  | 2.01571600  |
| Zr | 0 | -1.27872300 | 2.65518400  | 0.04373700  |
| Zr | 0 | 0.11095200  | -0.27874900 | 1.49278700  |
| H  | 0 | 2.11288000  | -1.30343500 | -1.84532000 |
| Al | 0 | 5.48427800  | -1.91659300 | -2.12141200 |
| Al | 0 | 4.92871900  | 0.61602300  | -2.82516900 |
| Al | 0 | 3.56814600  | -0.77591800 | 0.09165200  |
| Al | 0 | 6.87518700  | 0.01937500  | -0.19919400 |
| Al | 0 | 4.75022900  | 2.17567300  | -0.69152800 |
| Al | 0 | 6.06327900  | -2.79870500 | 0.41471400  |
| Al | 0 | 4.87866400  | 1.50723200  | 1.98875500  |
| Al | 0 | 5.79570800  | -1.06175200 | 2.60062200  |
| H  | 0 | 2.80016300  | 1.27729500  | -1.94664500 |
| H  | 0 | 4.12401300  | -3.39117600 | -0.94018500 |
| H  | 0 | 9.27253000  | 0.75423200  | -0.44795300 |
| H  | 0 | 5.45934000  | -3.52995100 | 2.78444600  |
| H  | 0 | 1.74098300  | -2.46089800 | -0.26102200 |
| H  | 0 | 5.83645100  | 3.68419200  | 1.05126700  |
| H  | 0 | 4.64725800  | 4.26544900  | -2.09744500 |
| H  | 0 | 7.87353900  | -2.39268700 | 2.25582600  |
| H  | 0 | 4.16108500  | -2.85681100 | 3.30584900  |
| H  | 0 | 5.13001200  | 2.09174800  | 4.20319900  |
| H  | 0 | 6.39960500  | -0.70287400 | 4.86233000  |
| H  | 0 | 7.15448900  | -0.48287700 | -3.12639700 |
| H  | 0 | 3.69662100  | -3.03595500 | -3.39830400 |
| H  | 0 | 2.38732100  | -0.32654900 | -3.14782200 |
| H  | 0 | 6.35927600  | 1.98167400  | -4.23600000 |
| H  | 0 | 4.12702100  | -1.58951300 | -4.00989800 |
| H  | 0 | 3.71138300  | 0.28236700  | -4.91886300 |
| O  | 0 | 4.33017100  | -0.68670800 | -1.58476900 |
| O  | 0 | 3.59313800  | 1.82028100  | -2.06971600 |
| O  | 0 | 5.08682000  | -3.40783600 | -1.12406600 |
| O  | 0 | 8.56340700  | 0.53176200  | 0.15657300  |
| O  | 0 | 6.81154900  | -1.65476600 | -0.86262100 |
| O  | 0 | 6.08961400  | 1.14773200  | -1.31320300 |
| O  | 0 | 2.55808200  | -2.18877000 | -0.70022400 |
| O  | 0 | 5.98826100  | -4.31858600 | 1.32955300  |
| O  | 0 | 5.33120500  | 3.62423600  | -1.86733700 |
| O  | 0 | 4.82850700  | -1.63944700 | 1.04006900  |
| O  | 0 | 3.87135100  | 1.03299500  | 0.48491300  |
| O  | 0 | 5.18275700  | 3.01430500  | 0.83108600  |
| O  | 0 | 6.40796900  | 0.50578700  | 1.51279800  |

|    |   |             |             |             |
|----|---|-------------|-------------|-------------|
| O  | 0 | 7.15759600  | -2.04021800 | 1.72110100  |
| O  | 0 | 5.12170100  | -2.81124900 | 3.39425600  |
| O  | 0 | 4.32251000  | 0.03756100  | 3.02692200  |
| O  | 0 | 5.20380400  | 2.55007500  | 3.36045700  |
| O  | 0 | 6.80576400  | -0.64107000 | 3.99466100  |
| O  | 0 | 6.24582300  | -0.72475000 | -3.33289900 |
| O  | 0 | 5.50542100  | 2.06332200  | -3.80119800 |
| O  | 0 | 4.47310900  | -2.51368500 | -3.64083300 |
| O  | 0 | 3.73546000  | -0.16639300 | -4.06634300 |
| H  | 0 | 3.44163300  | -0.23023800 | 2.71044900  |
| H  | 0 | -4.85796200 | -4.19345300 | 3.71217000  |
| H  | 0 | -6.21675200 | -3.03509900 | 3.62204000  |
| H  | 0 | -5.92782100 | -4.23970800 | 2.30497600  |
| H  | 0 | -5.62264400 | -4.14000700 | -3.01303400 |
| H  | 0 | -6.61383400 | -3.82649800 | -1.58606400 |
| H  | 0 | -6.81371300 | -2.78995500 | -3.04292300 |
| H  | 0 | -3.48911000 | 6.00519300  | -2.43377400 |
| H  | 0 | -4.68047500 | 5.00768300  | -3.36293300 |
| H  | 0 | -4.99387200 | 5.44144400  | -1.66953100 |
| H  | 0 | -2.78550900 | 5.70137400  | 3.33392000  |
| H  | 0 | -4.41509500 | 5.29565600  | 2.75419300  |
| H  | 0 | -3.87785900 | 4.65014000  | 4.32243800  |
| H  | 0 | 5.49309400  | 3.06090900  | -2.76746900 |
| H  | 0 | 5.58612100  | -5.08860500 | 0.91980500  |
| Ir | 0 | 8.32667900  | 1.30884400  | 2.13479500  |
| C  | 0 | 7.92569200  | 1.80187800  | 3.85039700  |
| C  | 0 | 9.97005900  | 2.00873200  | 2.38535900  |
| O  | 0 | 7.74744900  | 2.11126600  | 4.93041300  |
| O  | 0 | 11.01197200 | 2.46098400  | 2.52735700  |
| H  | 0 | 3.12786700  | 3.79963400  | 1.75977600  |
| H  | 0 | 1.98026800  | 4.70871700  | 2.75865400  |
| H  | 0 | 2.87085900  | 3.27775000  | 3.42757300  |
| H  | 0 | 2.54013300  | 3.39523400  | -3.56371200 |
| H  | 0 | 1.14077100  | 4.43167800  | -3.97832100 |
| H  | 0 | 2.00175300  | 4.72476100  | -2.45456600 |
| H  | 0 | 0.94451400  | -4.94315100 | -2.69428200 |
| H  | 0 | -0.69864100 | -5.48395100 | -3.11902600 |
| H  | 0 | 0.22049300  | -4.38010900 | -4.21806300 |
| H  | 0 | 0.88044200  | -4.80822800 | 3.29287900  |
| H  | 0 | 0.03126700  | -5.79342300 | 2.04541800  |
| H  | 0 | 1.60386100  | -5.01212700 | 1.68873200  |

### Al<sub>3</sub>-NU-1000 (C)

Electronic Energy: -7257.89269

Enthalpy: -7256.881214

Free Energy: -7257.094501

$\nu_{CO} = 2165, 2242 \text{ cm}^{-1}$

|   |    |             |             |             |
|---|----|-------------|-------------|-------------|
| C | -1 | 1.68441900  | 3.94341500  | -3.15514000 |
| C | -1 | 0.64899900  | -4.90821600 | 2.22466600  |
| C | -1 | 2.37165700  | 3.70494900  | 2.55374400  |
| C | -1 | 0.00185000  | -4.64437900 | -3.17737000 |
| C | -1 | -5.46152400 | -3.56982100 | 3.03745400  |
| C | -1 | -4.20580600 | 5.17837100  | -2.39073300 |
| C | -1 | -6.09808400 | -3.34300700 | -2.42691100 |
| C | -1 | -3.54711000 | 4.91457400  | 3.31258500  |

|    |    |             |             |             |
|----|----|-------------|-------------|-------------|
| C  | -1 | 1.27407100  | 2.82442300  | 2.03809500  |
| C  | -1 | 0.75416700  | 3.00364000  | -2.46953500 |
| C  | -1 | -3.54118900 | 3.93046700  | -1.89896000 |
| C  | -1 | -5.03722900 | -2.44266000 | -1.88258700 |
| C  | -1 | -4.54348500 | -2.62142800 | 2.33674300  |
| C  | -1 | -0.02842400 | -3.67128600 | 1.74594600  |
| C  | -1 | -3.03318900 | 3.71325000  | 2.58679300  |
| C  | -1 | -0.52889700 | -3.45027300 | -2.44888800 |
| H  | 0  | -1.87700600 | -1.86218200 | 2.76966400  |
| H  | 0  | 1.51883800  | 1.34313100  | -0.21664400 |
| H  | 0  | -3.64165400 | 1.57934700  | -3.97965200 |
| H  | 0  | -2.48456700 | 0.43523200  | -3.91849300 |
| H  | 0  | -2.80741500 | 1.02448000  | 4.52627300  |
| H  | 0  | -5.66119500 | 0.94392700  | 0.68757000  |
| H  | 0  | -6.36153200 | 0.46186000  | -1.17254400 |
| H  | 0  | -5.94161000 | 0.09415800  | 2.04338200  |
| H  | 0  | -2.56237000 | -1.61708600 | -2.83759500 |
| H  | 0  | -4.17039900 | 2.63578600  | 0.38707800  |
| H  | 0  | -0.55879500 | 0.71250500  | -4.50770900 |
| H  | 0  | -1.12830600 | -0.00980400 | 3.93114000  |
| H  | 0  | 0.39253700  | 0.54520400  | 4.01046400  |
| H  | 0  | 2.27705800  | -1.60493200 | 1.86822100  |
| O  | 0  | -1.74006600 | 1.26409600  | -1.38837300 |
| O  | 0  | -2.56013000 | 4.05820600  | -1.11028700 |
| O  | 0  | -2.21735100 | 3.90492500  | 1.64250600  |
| O  | 0  | 0.11809400  | 3.45090700  | -1.46951100 |
| O  | 0  | 0.64098700  | 1.82518600  | -2.89212400 |
| O  | 0  | 1.76737800  | -0.52894400 | -2.38274200 |
| O  | 0  | -0.07584300 | -2.32618600 | -2.76687300 |
| O  | 0  | 0.54748900  | -2.56745900 | 1.98772300  |
| O  | 0  | -1.40636700 | -3.63104200 | -1.55067200 |
| O  | 0  | -1.11280700 | -3.76629200 | 1.11888800  |
| O  | 0  | -4.11732600 | -2.99572500 | -1.21286000 |
| O  | 0  | -3.77429200 | -3.11617300 | 1.46504500  |
| O  | 0  | -4.55327700 | -1.40037300 | 2.65301700  |
| O  | 0  | -5.09418600 | -1.20340200 | -2.10543600 |
| O  | 0  | -3.43394700 | -0.57217900 | 0.18462500  |
| O  | 0  | -2.37604600 | -1.10425300 | -2.04324700 |
| O  | 0  | -1.07424000 | 0.07911800  | -3.99425500 |
| O  | 0  | -3.48852800 | 0.66733100  | -3.69742900 |
| O  | 0  | -0.12591800 | -0.22035700 | 3.72378900  |
| O  | 0  | -0.56934200 | -1.23020200 | -0.23026600 |
| O  | 0  | 0.62134000  | 0.97000100  | -0.24167400 |
| O  | 0  | 1.23762600  | 1.61899100  | 2.39098200  |
| O  | 0  | 2.21798300  | -0.69131000 | 1.54491800  |
| O  | 0  | 0.45410700  | 3.34511500  | 1.22771600  |
| O  | 0  | -5.69224600 | 1.03472300  | -0.78045600 |
| O  | 0  | -5.47042200 | 0.87303500  | 1.71742500  |
| O  | 0  | -3.49668500 | 1.95300300  | 0.29962000  |
| O  | 0  | -4.01216400 | 2.81549100  | -2.25164400 |
| O  | 0  | -3.47078100 | 2.57466300  | 2.91719100  |
| O  | 0  | -2.59148800 | 0.26283900  | 3.97558800  |
| O  | 0  | -1.84687500 | -1.28905900 | 1.99570400  |
| O  | 0  | -1.38820600 | 1.14366200  | 1.45130000  |
| Zr | 0  | -2.35561800 | -2.31411200 | -0.05116400 |
| Zr | 0  | -0.33801700 | -0.12771200 | -2.05000900 |
| Zr | 0  | -3.76185800 | 0.60472400  | -1.47573200 |
| Zr | 0  | -3.27524100 | 0.46839500  | 2.01068600  |

|    |   |             |             |             |
|----|---|-------------|-------------|-------------|
| Zr | 0 | -1.27256900 | 2.65061800  | 0.03919400  |
| Zr | 0 | 0.10469900  | -0.29617800 | 1.48473600  |
| H  | 0 | 2.08649500  | -1.28638100 | -1.71016400 |
| Al | 0 | 5.66103400  | -2.03743900 | -1.72883900 |
| Al | 0 | 4.97269700  | 0.31952500  | -2.86274100 |
| Al | 0 | 3.57653400  | -0.68824800 | 0.14806200  |
| Al | 0 | 6.98671800  | 0.35055800  | -0.26723800 |
| Al | 0 | 4.57072900  | 2.23512900  | -1.04171600 |
| Al | 0 | 6.20100500  | -2.48257000 | 0.89000700  |
| Al | 0 | 4.81705900  | 1.85984900  | 1.65818700  |
| Al | 0 | 5.72114200  | -0.46553100 | 2.57036500  |
| H  | 0 | 2.74759500  | 1.11885900  | -2.30674200 |
| H  | 0 | 4.98510100  | -4.18165700 | -0.52148100 |
| H  | 0 | 9.01704000  | 1.56639400  | -0.22593200 |
| H  | 0 | 6.67248600  | -4.27668100 | 2.45859500  |
| H  | 0 | 1.73361600  | -2.38945500 | -0.16308300 |
| H  | 0 | 5.55349000  | 3.97047400  | 0.50151000  |
| H  | 0 | 4.38612300  | 3.72338800  | -2.87793800 |
| H  | 0 | 7.99032000  | -1.00996900 | 1.87358600  |
| H  | 0 | 4.33935300  | -1.96078600 | 3.96271000  |
| H  | 0 | 5.54868500  | -2.74395000 | 3.28570000  |
| H  | 0 | 5.13850000  | 3.33469400  | 3.61996600  |
| H  | 0 | 6.30211500  | 1.59577900  | 3.65408000  |
| H  | 0 | 6.29810400  | 0.44728900  | 4.81015300  |
| H  | 0 | 7.25175700  | -0.79757300 | -3.06003100 |
| H  | 0 | 3.60042600  | -2.93869900 | -2.32144300 |
| H  | 0 | 2.37295100  | -0.58113700 | -3.17435900 |
| H  | 0 | 5.85709000  | 1.30761200  | -4.99337900 |
| H  | 0 | 4.15090300  | -2.13796900 | -3.53688700 |
| H  | 0 | 3.84205300  | -0.47073700 | -4.95063400 |
| O  | 0 | 4.42924500  | -0.78517500 | -1.45126400 |
| O  | 0 | 3.57790600  | 1.60369100  | -2.43670500 |
| O  | 0 | 5.64873700  | -3.49011300 | -0.60290000 |
| O  | 0 | 8.68667800  | 0.67267700  | -0.33519600 |
| O  | 0 | 6.87754200  | -1.44969900 | -0.49038900 |
| O  | 0 | 6.00542200  | 1.22867600  | -1.48844100 |
| O  | 0 | 2.52136400  | -2.08095200 | -0.63108000 |
| O  | 0 | 5.92206400  | -3.76049400 | 2.14824200  |
| O  | 0 | 5.06843100  | 3.64383900  | -2.19899400 |
| O  | 0 | 4.76612600  | -1.45858600 | 1.27867900  |
| O  | 0 | 3.70055300  | 1.19491600  | 0.27395900  |
| O  | 0 | 4.89922900  | 3.26711300  | 0.44519700  |
| O  | 0 | 6.23532000  | 0.80164600  | 1.29936300  |
| O  | 0 | 7.23182500  | -1.53678500 | 2.15981500  |
| O  | 0 | 5.29560600  | -1.90112800 | 3.83830200  |
| O  | 0 | 4.17901700  | 0.61509500  | 2.90933400  |
| O  | 0 | 5.63575200  | 2.78811200  | 3.00686500  |
| O  | 0 | 6.59405900  | 0.62218200  | 3.90913300  |
| O  | 0 | 6.33807300  | -1.09768000 | -3.14384400 |
| O  | 0 | 5.76381100  | 1.51329600  | -4.06079800 |
| O  | 0 | 4.37777000  | -2.91987600 | -2.91720700 |
| O  | 0 | 3.83342700  | -0.65244600 | -4.00631300 |
| H  | 0 | 3.32445000  | 0.24477400  | 2.61099800  |
| Ir | 0 | 6.87104100  | 3.16933200  | -3.27428000 |
| C  | 0 | 8.35657700  | 2.79520900  | -4.24291000 |
| C  | 0 | 7.67209600  | 4.68096300  | -2.68030100 |
| O  | 0 | 9.28655900  | 2.55936600  | -4.86364200 |
| O  | 0 | 8.16254100  | 5.64596700  | -2.31393100 |

|   |   |             |             |             |
|---|---|-------------|-------------|-------------|
| H | 0 | -4.85461800 | -4.22204900 | 3.68115100  |
| H | 0 | -6.19479700 | -3.03661100 | 3.65060600  |
| H | 0 | -5.95635300 | -4.21281900 | 2.29927800  |
| H | 0 | -5.62255600 | -4.13310200 | -3.02236400 |
| H | 0 | -6.60642200 | -3.83570600 | -1.58697500 |
| H | 0 | -6.81956300 | -2.78851300 | -3.03477000 |
| H | 0 | -3.48940400 | 6.00550600  | -2.43279700 |
| H | 0 | -4.67900300 | 5.00763600  | -3.36363700 |
| H | 0 | -4.99506800 | 5.44097100  | -1.67067300 |
| H | 0 | -2.79697600 | 5.71241000  | 3.31097200  |
| H | 0 | -4.43381600 | 5.27749200  | 2.77172700  |
| H | 0 | -3.85290700 | 4.65393800  | 4.33143600  |
| H | 0 | 3.03869300  | 3.95008200  | 1.71338700  |
| H | 0 | 1.95310900  | 4.65216300  | 2.91729000  |
| H | 0 | 2.92363800  | 3.19525100  | 3.35269700  |
| H | 0 | 1.63480800  | -4.97691800 | 1.74346100  |
| H | 0 | 0.82298100  | -4.83076800 | 3.30599000  |
| H | 0 | 0.05614900  | -5.79865100 | 1.99521700  |
| H | 0 | 1.05716000  | -4.77899500 | -2.89993600 |
| H | 0 | -0.56321300 | -5.54712400 | -2.92596800 |
| H | 0 | -0.02697300 | -4.45152500 | -4.25699300 |
| H | 0 | 2.29669200  | 3.41263600  | -3.89075400 |
| H | 0 | 1.09481100  | 4.73344100  | -3.64200400 |
| H | 0 | 2.31339900  | 4.43609800  | -2.40074500 |

### Al<sub>3</sub>-NU-1000 (C<sub>geminal</sub>)

Electronic Energy: -7257.873005

Enthalpy: -7256.862545

Free Energy: -7257.075314

$\nu_{\text{CO}} = 2176, 2250 \text{ cm}^{-1}$

|   |             |             |             |
|---|-------------|-------------|-------------|
| C | 1.68444800  | 3.94340000  | -3.15512100 |
| C | 0.64900500  | -4.90821400 | 2.22466400  |
| C | 2.37166400  | 3.70494700  | 2.55373300  |
| C | 0.00185700  | -4.64437500 | -3.17737100 |
| C | -5.46152300 | -3.56982200 | 3.03745400  |
| C | -4.20580500 | 5.17837200  | -2.39073100 |
| C | -6.09808300 | -3.34300800 | -2.42691100 |
| C | -3.54710600 | 4.91457500  | 3.31258600  |
| C | 1.27405600  | 2.82442600  | 2.03808400  |
| C | 0.75414900  | 3.00362100  | -2.46954200 |
| C | -3.54119800 | 3.93046700  | -1.89895400 |
| C | -5.03723600 | -2.44266000 | -1.88258800 |
| C | -4.54349000 | -2.62143200 | 2.33674400  |
| C | -0.02842600 | -3.67127100 | 1.74594700  |
| C | -3.03319100 | 3.71324400  | 2.58679900  |
| C | -0.52889300 | -3.45025300 | -2.44888900 |
| H | -1.87216800 | -1.85783300 | 2.77289400  |
| H | 1.48777300  | 1.40537300  | -0.19140300 |
| H | -3.63903500 | 1.57857300  | -3.97677900 |
| H | -2.48383800 | 0.43205000  | -3.91632500 |
| H | -2.80703100 | 1.02602200  | 4.52908100  |
| H | -5.66111100 | 0.94325500  | 0.69009100  |
| H | -6.36106300 | 0.46049300  | -1.17221000 |
| H | -5.94000300 | 0.09212800  | 2.04435500  |
| H | -2.55960100 | -1.61909100 | -2.83340700 |

|    |             |             |             |
|----|-------------|-------------|-------------|
| H  | -4.17303800 | 2.63529300  | 0.38789400  |
| H  | -0.56005300 | 0.70584500  | -4.50619900 |
| H  | -1.12679600 | -0.00353100 | 3.93665900  |
| H  | 0.40107900  | 0.53990700  | 4.02689300  |
| H  | 2.21745000  | -1.67902800 | 1.78837500  |
| O  | -1.74135600 | 1.26390800  | -1.38807400 |
| O  | -2.56034900 | 4.05903800  | -1.11067400 |
| O  | -2.22063100 | 3.90644200  | 1.64050800  |
| O  | 0.11692200  | 3.44455700  | -1.46790700 |
| O  | 0.63786400  | 1.82797900  | -2.90136600 |
| O  | 1.76759800  | -0.51004700 | -2.39787500 |
| O  | -0.06564200 | -2.32729700 | -2.75556900 |
| O  | 0.53822800  | -2.56930500 | 2.00635300  |
| O  | -1.40736600 | -3.63404100 | -1.55297500 |
| O  | -1.10680800 | -3.76759300 | 1.10935100  |
| O  | -4.11756800 | -2.99460400 | -1.21150300 |
| O  | -3.77079800 | -3.11551800 | 1.46737100  |
| O  | -4.55416800 | -1.40065500 | 2.65365600  |
| O  | -5.09392300 | -1.20346000 | -2.10656300 |
| O  | -3.43353500 | -0.57188100 | 0.18649900  |
| O  | -2.37234900 | -1.10590500 | -2.03954200 |
| O  | -1.07573200 | 0.07303800  | -3.99200200 |
| O  | -3.48805000 | 0.66584000  | -3.69568300 |
| O  | -0.12505600 | -0.21622600 | 3.72863400  |
| O  | -0.56288100 | -1.22261800 | -0.22527400 |
| O  | 0.61924500  | 0.97849600  | -0.24008100 |
| O  | 1.24044500  | 1.61099300  | 2.37717300  |
| O  | 2.21448200  | -0.74870600 | 1.51068200  |
| O  | 0.44774600  | 3.33831800  | 1.22512200  |
| O  | -5.69251700 | 1.03386700  | -0.77966800 |
| O  | -5.47075800 | 0.87255300  | 1.71927500  |
| O  | -3.49866200 | 1.95319400  | 0.30027600  |
| O  | -4.01238400 | 2.81540200  | -2.25145700 |
| O  | -3.46935600 | 2.57423000  | 2.91782300  |
| O  | -2.59169200 | 0.26408900  | 3.97847400  |
| O  | -1.84318500 | -1.28614400 | 1.99779500  |
| O  | -1.39061500 | 1.14515400  | 1.45331200  |
| Zr | -2.35143200 | -2.30858700 | -0.04932100 |
| Zr | -0.33680300 | -0.12143500 | -2.04712300 |
| Zr | -3.76183500 | 0.60492600  | -1.47425700 |
| Zr | -3.27414500 | 0.46970200  | 2.01361800  |
| Zr | -1.27515700 | 2.65292000  | 0.04377300  |
| Zr | 0.11183100  | -0.28581700 | 1.49538500  |
| H  | 2.12278400  | -1.30160900 | -1.80218100 |
| Al | 5.59945500  | -1.82945400 | -2.05794600 |
| Al | 4.94380900  | 0.64966900  | -2.80589300 |
| Al | 3.55944300  | -0.71899300 | 0.11082100  |
| Al | 7.00565200  | 0.27429900  | -0.21943400 |
| Al | 4.63788500  | 2.23627000  | -0.73481200 |
| Al | 6.06953600  | -2.59081800 | 0.46895200  |
| Al | 4.92050200  | 1.61340800  | 1.92430000  |
| Al | 5.75902600  | -0.88775800 | 2.52370400  |
| H  | 2.74549100  | 1.20956400  | -1.99761100 |
| H  | 4.35805000  | -3.55346700 | -0.89518400 |
| H  | 9.11146400  | 1.32775100  | -0.01197500 |
| H  | 5.47493900  | -3.62045300 | 2.48288000  |
| H  | 1.74206200  | -2.40350100 | -0.23387100 |
| H  | 5.73174800  | 3.81835100  | 0.93320300  |

|    |             |             |             |
|----|-------------|-------------|-------------|
| H  | 4.37548600  | 4.26063800  | -2.20613100 |
| H  | 7.98991200  | -1.59510100 | 1.66998200  |
| H  | 4.34438600  | -2.39329700 | 3.87686100  |
| H  | 5.08218400  | 2.23058900  | 4.14194500  |
| H  | 6.94761900  | 0.47659600  | 4.20284700  |
| H  | 7.22842200  | -0.32459200 | -3.00201600 |
| H  | 3.90026200  | -3.06365800 | -3.34966600 |
| H  | 2.38725800  | -0.38334500 | -3.16284200 |
| H  | 6.32641700  | 2.07126600  | -4.18827300 |
| H  | 4.26830700  | -1.57638000 | -3.95637400 |
| H  | 3.85442200  | 0.16661300  | -4.93447000 |
| O  | 4.36650300  | -0.67098300 | -1.54547700 |
| O  | 3.51818100  | 1.78275400  | -2.11344300 |
| O  | 5.30699200  | -3.38124100 | -1.03237400 |
| O  | 8.72107600  | 0.49491200  | -0.28357800 |
| O  | 6.83654000  | -1.48767500 | -0.74253700 |
| O  | 6.03372700  | 1.28557200  | -1.32485400 |
| O  | 2.54742900  | -2.11889200 | -0.68673300 |
| O  | 5.68270700  | -4.13070400 | 1.63281900  |
| O  | 5.11635700  | 3.70213900  | -1.93900100 |
| O  | 4.72949200  | -1.65527400 | 1.14040300  |
| O  | 3.79936900  | 1.10518400  | 0.47752200  |
| O  | 5.10354500  | 3.11152700  | 0.76458400  |
| O  | 6.31895800  | 0.51514500  | 1.42694700  |
| O  | 7.17513100  | -2.08392700 | 1.85036600  |
| O  | 5.28337000  | -2.45107800 | 3.65260200  |
| O  | 4.31409100  | 0.19813200  | 3.03663800  |
| O  | 5.33421100  | 2.62980700  | 3.30491000  |
| O  | 6.80736200  | -0.45674300 | 4.00889500  |
| O  | 6.34580200  | -0.62646500 | -3.25222400 |
| O  | 5.43486200  | 2.10386900  | -3.82720000 |
| O  | 4.65950100  | -2.50780800 | -3.56799600 |
| O  | 3.83045500  | -0.24301700 | -4.06192800 |
| H  | 3.43284600  | -0.07664600 | 2.72043200  |
| H  | -4.85810400 | -4.19412200 | 3.71167200  |
| H  | -6.21653700 | -3.03519100 | 3.62246700  |
| H  | -5.92832000 | -4.23913300 | 2.30474900  |
| H  | -5.62242900 | -4.13979400 | -3.01315200 |
| H  | -6.61400000 | -3.82667400 | -1.58626000 |
| H  | -6.81371700 | -2.79002200 | -3.04302200 |
| H  | -3.48908900 | 6.00521100  | -2.43321900 |
| H  | -4.67963000 | 5.00772000  | -3.36336600 |
| H  | -4.99452000 | 5.44136900  | -1.67020900 |
| H  | -2.78806800 | 5.70392900  | 3.32882100  |
| H  | -4.41947600 | 5.29156300  | 2.75823100  |
| H  | -3.87224900 | 4.65084700  | 4.32450400  |
| H  | 5.33438200  | 3.11639100  | -2.81950100 |
| H  | 6.43214600  | -4.69732700 | 1.86184300  |
| Ir | 6.52004100  | -2.01540800 | 5.33576300  |
| C  | 6.12470300  | -3.49924500 | 6.31393600  |
| C  | 7.63090200  | -1.48140600 | 6.67349600  |
| O  | 5.86613100  | -4.43330900 | 6.91827700  |
| O  | 8.32483900  | -1.14359900 | 7.51269700  |
| H  | 3.08985500  | 3.86864300  | 1.73731000  |
| H  | 1.96289100  | 4.68393900  | 2.83365000  |
| H  | 2.91202400  | 3.24603500  | 3.38632800  |
| H  | 2.52289400  | 3.39145800  | -3.59335700 |
| H  | 1.13075100  | 4.45874900  | -3.95487100 |



|   |             |             |             |
|---|-------------|-------------|-------------|
| H | 2.02209300  | 4.70746600  | -2.44389900 |
| H | 0.94010800  | -4.94811200 | -2.68900500 |
| H | -0.70236700 | -5.48129800 | -3.12528000 |
| H | 0.22836300  | -4.37802300 | -4.21576300 |
| H | 0.81627400  | -4.83274800 | 3.30717600  |
| H | 0.05942300  | -5.79965700 | 1.99028700  |
| H | 1.63642800  | -4.97549100 | 1.74595500  |

### Al<sub>2</sub>-NU-1000 (geminal)

Electronic Energy: -7257.885389

Enthalpy: -7256.874432

Free Energy: -7257.086325

$\nu_{\text{CO}} = 2173, 2248 \text{ cm}^{-1}$

|   |             |             |             |
|---|-------------|-------------|-------------|
| C | 1.68444800  | 3.94340000  | -3.15512100 |
| C | 0.64900500  | -4.90821400 | 2.22466400  |
| C | 2.37166400  | 3.70494700  | 2.55373300  |
| C | 0.00185700  | -4.64437500 | -3.17737100 |
| C | -5.46152300 | -3.56982200 | 3.03745400  |
| C | -4.20580500 | 5.17837200  | -2.39073100 |
| C | -6.09808300 | -3.34300800 | -2.42691100 |
| C | -3.54710600 | 4.91457500  | 3.31258600  |
| C | 1.27405600  | 2.82442600  | 2.03808400  |
| C | 0.75414900  | 3.00362100  | -2.46954200 |
| C | -3.54119800 | 3.93046700  | -1.89895400 |
| C | -5.03723600 | -2.44266000 | -1.88258800 |
| C | -4.54349000 | -2.62143200 | 2.33674400  |
| C | -0.02842600 | -3.67127100 | 1.74594700  |
| C | -3.03319100 | 3.71324400  | 2.58679900  |
| C | -0.52889300 | -3.45025300 | -2.44888900 |
| H | -1.90520400 | -1.95297900 | 2.68076700  |
| H | 1.49613000  | 1.36772400  | -0.20474500 |
| H | -3.63049100 | 1.57497000  | -3.99582600 |
| H | -2.46294200 | 0.43016600  | -3.91820400 |
| H | -2.74888400 | 1.18764000  | 4.44274500  |
| H | -5.67228300 | 0.93465100  | 0.66400300  |
| H | -6.36441300 | 0.45404400  | -1.18248300 |
| H | -5.95739300 | 0.10051200  | 2.03962300  |
| H | -2.55551000 | -1.61541000 | -2.83797000 |
| H | -4.17999300 | 2.63588900  | 0.38610800  |
| H | -0.55529600 | 0.69341900  | -4.50626000 |
| H | 0.53669900  | 0.44761600  | 4.02252000  |
| H | 2.26889000  | -1.61993500 | 1.84562500  |
| O | -1.74796200 | 1.26400300  | -1.38679900 |
| O | -2.55944200 | 4.05551100  | -1.11171900 |
| O | -2.22936100 | 3.90573100  | 1.63533100  |
| O | 0.12186600  | 3.44974100  | -1.46436100 |
| O | 0.62831000  | 1.83130400  | -2.89989000 |
| O | 1.76364900  | -0.51006800 | -2.39134600 |
| O | -0.06933300 | -2.32640800 | -2.75481100 |
| O | 0.53759900  | -2.56962800 | 2.00509500  |
| O | -1.40810400 | -3.63449700 | -1.55216800 |
| O | -1.11563600 | -3.76331900 | 1.11863400  |
| O | -4.11597100 | -2.99345800 | -1.21473800 |
| O | -3.77916200 | -3.10411900 | 1.45818500  |
| O | -4.54029300 | -1.40313800 | 2.67963000  |

|    |             |             |             |
|----|-------------|-------------|-------------|
| O  | -5.09305800 | -1.20352200 | -2.11246600 |
| O  | -3.45290400 | -0.56815000 | 0.17644300  |
| O  | -2.37418600 | -1.10385300 | -2.04152600 |
| O  | -1.07773800 | 0.07191500  | -3.98525000 |
| O  | -3.47714600 | 0.66646500  | -3.70329200 |
| O  | 0.02584100  | -0.30206900 | 3.68966100  |
| O  | -0.56741400 | -1.22401500 | -0.22291800 |
| O  | 0.60235200  | 0.98824400  | -0.22910500 |
| O  | 1.24860500  | 1.61682100  | 2.37959300  |
| O  | 2.22034200  | -0.71114500 | 1.50719900  |
| O  | 0.44384600  | 3.34886500  | 1.23962600  |
| O  | -5.70008200 | 1.03216500  | -0.78945900 |
| O  | -5.47782400 | 0.86757000  | 1.69889500  |
| O  | -3.50742100 | 1.95218100  | 0.29710300  |
| O  | -4.01537300 | 2.81632500  | -2.25268200 |
| O  | -3.46076100 | 2.57028200  | 2.92576200  |
| O  | -2.73338200 | 0.30700700  | 4.04622100  |
| O  | -1.86362200 | -1.28929900 | 1.98047300  |
| O  | -1.40672200 | 1.14342400  | 1.46120700  |
| Zr | -2.34239300 | -2.30595500 | -0.06319900 |
| Zr | -0.33130100 | -0.12689000 | -2.03652800 |
| Zr | -3.76586200 | 0.60888100  | -1.49200100 |
| Zr | -3.28814200 | 0.46223000  | 1.97806100  |
| Zr | -1.26989800 | 2.64397500  | 0.03833600  |
| Zr | 0.10993900  | -0.28551600 | 1.53050800  |
| H  | 2.09588000  | -1.29112100 | -1.73867900 |
| Al | 5.63897300  | -1.97550500 | -1.83375800 |
| Al | 4.96303100  | 0.42468300  | -2.88794500 |
| Al | 3.57176500  | -0.70809000 | 0.11824800  |
| Al | 6.98745700  | 0.32137700  | -0.25539800 |
| Al | 4.60365500  | 2.19924900  | -0.97604700 |
| Al | 6.18099300  | -2.52391000 | 0.77958400  |
| Al | 4.81932200  | 1.80157200  | 1.70002100  |
| Al | 5.71608000  | -0.55843200 | 2.55372400  |
| H  | 2.74715300  | 1.11842300  | -2.18946800 |
| H  | 4.89043800  | -4.12342200 | -0.67475200 |
| H  | 9.05725300  | 1.44743100  | -0.03649200 |
| H  | 5.54828300  | -2.87818100 | 3.16948500  |
| H  | 1.72441100  | -2.37978900 | -0.21265200 |
| H  | 5.62882800  | 3.90039000  | 0.56221400  |
| H  | 4.44255000  | 4.08637000  | -2.63165400 |
| H  | 7.98087000  | -1.08526500 | 1.69090000  |
| H  | 4.43075100  | -2.10308700 | 4.02801000  |
| H  | 5.07867300  | 3.15969800  | 3.72902300  |
| H  | 7.25294800  | -0.66756100 | -3.04546600 |
| H  | 3.63563100  | -2.93120100 | -2.56561000 |
| H  | 6.43043300  | 1.70562200  | -4.32357000 |
| H  | 4.17602300  | -1.96852800 | -3.68024100 |
| H  | 3.85738600  | -0.24207600 | -4.95130800 |
| O  | 4.41085300  | -0.74167300 | -1.49484700 |
| O  | 3.54000200  | 1.65715800  | -2.33976100 |
| O  | 5.58350500  | -3.46017700 | -0.74612300 |
| O  | 8.70517600  | 0.56941600  | -0.19474300 |
| O  | 6.86931100  | -1.46383500 | -0.56882800 |
| O  | 6.03545700  | 1.23460400  | -1.45000800 |
| O  | 2.51903400  | -2.08594900 | -0.67846000 |
| O  | 5.94181500  | -3.85284400 | 1.97987300  |
| O  | 5.16798700  | 3.55639900  | -2.27789700 |

|    |             |             |             |
|----|-------------|-------------|-------------|
| O  | 4.76682500  | -1.50069300 | 1.22496000  |
| O  | 3.71535600  | 1.17308000  | 0.31485000  |
| O  | 4.92160400  | 3.25161300  | 0.48308700  |
| O  | 6.23906900  | 0.75713700  | 1.31412500  |
| O  | 7.24657100  | -1.59151300 | 2.06880100  |
| O  | 5.35495600  | -2.05188900 | 3.75503400  |
| O  | 4.19907800  | 0.52166000  | 2.92750800  |
| O  | 5.61243200  | 2.71750400  | 3.06373000  |
| O  | 6.56821000  | 0.50687600  | 3.93990400  |
| O  | 6.34256200  | -0.94962100 | -3.19753300 |
| O  | 5.52334200  | 1.77834700  | -4.01062600 |
| O  | 4.43256500  | -2.80195300 | -3.11334000 |
| O  | 3.81701800  | -0.53488500 | -4.03433300 |
| H  | 3.34284100  | 0.15877500  | 2.62494400  |
| H  | -4.98635500 | -3.86358600 | 3.98550300  |
| H  | -6.41041700 | -3.07970900 | 3.28493200  |
| H  | -5.62187400 | -4.46622800 | 2.43067500  |
| H  | -5.62464200 | -4.09417300 | -3.07299400 |
| H  | -6.56597900 | -3.88486600 | -1.59426000 |
| H  | -6.84973700 | -2.78087000 | -2.98947400 |
| H  | -3.49562100 | 6.01154200  | -2.41118400 |
| H  | -4.65838800 | 5.01303300  | -3.37442300 |
| H  | -5.01245800 | 5.42643700  | -1.68495100 |
| H  | -2.81647000 | 5.72885100  | 3.26997200  |
| H  | -4.46372900 | 5.24560400  | 2.80194600  |
| H  | -3.80879800 | 4.66448400  | 4.34650000  |
| H  | 5.40854000  | 2.88114600  | -3.08722000 |
| H  | 6.70049800  | -4.36948000 | 2.26752400  |
| H  | 3.05682900  | 3.92732600  | 1.72188500  |
| H  | 1.95744000  | 4.66206600  | 2.89497500  |
| H  | 2.90637500  | 3.20522000  | 3.37015800  |
| H  | 2.43821100  | 3.38395400  | -3.71918100 |
| H  | 1.09922700  | 4.57683000  | -3.83865200 |
| H  | 2.13959800  | 4.60777700  | -2.40884100 |
| H  | 0.95104400  | -4.93595800 | -2.70327900 |
| H  | -0.69459700 | -5.48660900 | -3.11087500 |
| H  | 0.21367900  | -4.38120500 | -4.21962800 |
| H  | 0.72683200  | -4.87024400 | 3.32011000  |
| H  | 0.10315800  | -5.80503900 | 1.91658600  |
| H  | 1.67402200  | -4.92862000 | 1.82975900  |
| H  | 7.52987700  | 0.49506800  | 3.86136200  |
| H  | 6.26005100  | 1.47164700  | 3.70538000  |
| Ir | -1.44808900 | -1.09660200 | 4.95606500  |
| C  | -2.80157200 | -1.78509000 | 5.96537800  |
| C  | -0.28338500 | -2.32126000 | 5.63066900  |
| O  | 0.45913600  | -3.09355300 | 6.02347700  |
| O  | -3.65795400 | -2.22435000 | 6.57718400  |
| H  | 2.37339100  | -0.50783500 | -3.18345200 |

### Al<sub>3</sub>-NU-1000 (opposite)

Electronic Energy: -7257.886169

Enthalpy: -7256.875205

Free Energy: -7257.087432

$\nu_{\text{CO}} = 2174, 2249 \text{ cm}^{-1}$

|   |    |            |            |             |
|---|----|------------|------------|-------------|
| C | -1 | 1.68444800 | 3.94340000 | -3.15512100 |
|---|----|------------|------------|-------------|

|   |    |             |             |             |
|---|----|-------------|-------------|-------------|
| C | -1 | 0.64900500  | -4.90821400 | 2.22466400  |
| C | -1 | 2.37166400  | 3.70494700  | 2.55373300  |
| C | -1 | 0.00185700  | -4.64437500 | -3.17737100 |
| C | -1 | -5.46152300 | -3.56982200 | 3.03745400  |
| C | -1 | -4.20580500 | 5.17837200  | -2.39073100 |
| C | -1 | -6.09808300 | -3.34300800 | -2.42691100 |
| C | -1 | -3.54710600 | 4.91457500  | 3.31258600  |
| C | -1 | 1.27405600  | 2.82442600  | 2.03808400  |
| C | -1 | 0.75414900  | 3.00362100  | -2.46954200 |
| C | -1 | -3.54119800 | 3.93046700  | -1.89895400 |
| C | -1 | -5.03723600 | -2.44266000 | -1.88258800 |
| C | -1 | -4.54349000 | -2.62143200 | 2.33674400  |
| C | -1 | -0.02842600 | -3.67127100 | 1.74594700  |
| C | -1 | -3.03319100 | 3.71324400  | 2.58679900  |
| C | -1 | -0.52889300 | -3.45025300 | -2.44888900 |
| H | 0  | -1.88404700 | -1.86766400 | 2.76172000  |
| H | 0  | 1.50740700  | 1.36138400  | -0.20515100 |
| H | 0  | -3.64294500 | 1.57315400  | -3.99135000 |
| H | 0  | -2.46534800 | 0.43726400  | -3.92377700 |
| H | 0  | -2.82019600 | 1.00996500  | 4.53661700  |
| H | 0  | -6.32144100 | 0.28598000  | -1.15902400 |
| H | 0  | -5.91371500 | 0.10871300  | 2.16299500  |
| H | 0  | -2.56348200 | -1.61628900 | -2.84225100 |
| H | 0  | -4.05564200 | 2.72102500  | 0.38286800  |
| H | 0  | -0.55124000 | 0.69686100  | -4.51755900 |
| H | 0  | -1.15007600 | -0.00500700 | 3.92929900  |
| H | 0  | 0.38746500  | 0.52308700  | 4.03273600  |
| H | 0  | 2.26223500  | -1.61203500 | 1.87675600  |
| O | 0  | -1.73524300 | 1.26014600  | -1.40540500 |
| O | 0  | -2.55015400 | 4.05007500  | -1.12590100 |
| O | 0  | -2.22410100 | 3.90384000  | 1.63371600  |
| O | 0  | 0.12414900  | 3.44574400  | -1.46358800 |
| O | 0  | 0.63196600  | 1.83067100  | -2.90355300 |
| O | 0  | 1.77302700  | -0.51802600 | -2.39236100 |
| O | 0  | -0.06889900 | -2.32655600 | -2.75947600 |
| O | 0  | 0.54190500  | -2.56712200 | 1.99241100  |
| O | 0  | -1.40572300 | -3.63196800 | -1.55076400 |
| O | 0  | -1.11207900 | -3.76723800 | 1.11580800  |
| O | 0  | -4.10990300 | -2.99611200 | -1.22814800 |
| O | 0  | -3.78587500 | -3.11361200 | 1.45173800  |
| O | 0  | -4.54591500 | -1.40585000 | 2.66209600  |
| O | 0  | -5.10341400 | -1.19843500 | -2.08985100 |
| O | 0  | -3.44025200 | -0.56633600 | 0.17392700  |
| O | 0  | -2.37331500 | -1.10412500 | -2.04834400 |
| O | 0  | -1.07213100 | 0.07183600  | -3.99900200 |
| O | 0  | -3.47448200 | 0.66772500  | -3.69774300 |
| O | 0  | -0.14199400 | -0.22580500 | 3.72430200  |
| O | 0  | -0.57078300 | -1.22508000 | -0.23183100 |
| O | 0  | 0.61610800  | 0.97629100  | -0.23992700 |
| O | 0  | 1.23642000  | 1.62031300  | 2.39103900  |
| O | 0  | 2.21152700  | -0.69612600 | 1.55846500  |
| O | 0  | 0.45533400  | 3.34765600  | 1.22722400  |
| O | 0  | -5.76257200 | 1.03513300  | -0.91584700 |
| O | 0  | -5.42810600 | 0.90156300  | 1.90234200  |
| O | 0  | -3.47703900 | 1.95465100  | 0.28652500  |
| O | 0  | -4.03714100 | 2.81641700  | -2.23330300 |
| O | 0  | -3.47280300 | 2.57970400  | 2.91957300  |
| O | 0  | -2.59187700 | 0.26090400  | 3.97408600  |

|    |   |             |             |             |
|----|---|-------------|-------------|-------------|
| O  | 0 | -1.85708500 | -1.29211400 | 1.98941400  |
| O  | 0 | -1.39036800 | 1.14252000  | 1.45410100  |
| Zr | 0 | -2.35249100 | -2.31087300 | -0.04924400 |
| Zr | 0 | -0.32372500 | -0.13229000 | -2.05626800 |
| Zr | 0 | -3.73102000 | 0.60625500  | -1.48031500 |
| Zr | 0 | -3.31248800 | 0.46645900  | 2.01766500  |
| Zr | 0 | -1.26078500 | 2.63528200  | 0.04696200  |
| Zr | 0 | 0.09558400  | -0.29331900 | 1.49468800  |
| H  | 0 | 2.09995100  | -1.28166300 | -1.72157000 |
| Al | 0 | 5.64648900  | -1.97046200 | -1.78146700 |
| Al | 0 | 4.97146200  | 0.42133400  | -2.85367500 |
| Al | 0 | 3.56838100  | -0.69217300 | 0.15723800  |
| Al | 0 | 6.98498900  | 0.33868200  | -0.21503400 |
| Al | 0 | 4.59719900  | 2.20680500  | -0.95578900 |
| Al | 0 | 6.17820600  | -2.50145700 | 0.83726800  |
| Al | 0 | 4.81014500  | 1.82889000  | 1.72446900  |
| Al | 0 | 5.70619300  | -0.52445000 | 2.59661700  |
| H  | 0 | 2.74664900  | 1.11444400  | -2.17853400 |
| H  | 0 | 4.90108500  | -4.11733800 | -0.61328400 |
| H  | 0 | 9.05253500  | 1.47058000  | -0.00236900 |
| H  | 0 | 5.53776200  | -2.84026200 | 3.22701500  |
| H  | 0 | 1.71631500  | -2.36230100 | -0.17291700 |
| H  | 0 | 5.62118700  | 3.91749900  | 0.57038100  |
| H  | 0 | 4.43824800  | 4.08356200  | -2.62303500 |
| H  | 0 | 7.97356900  | -1.05604100 | 1.74489800  |
| H  | 0 | 4.41561200  | -2.05870400 | 4.07324500  |
| H  | 0 | 5.07487700  | 3.21141500  | 3.73927300  |
| H  | 0 | 7.26443300  | -0.66731700 | -2.99400500 |
| H  | 0 | 3.65069800  | -2.93691700 | -2.52532600 |
| H  | 0 | 6.44152200  | 1.69793000  | -4.29126000 |
| H  | 0 | 4.19905600  | -1.97941400 | -3.64000700 |
| H  | 0 | 3.88404400  | -0.25893600 | -4.92180600 |
| O  | 0 | 4.41281700  | -0.73835000 | -1.45563000 |
| O  | 0 | 3.54151600  | 1.65243800  | -2.32080800 |
| O  | 0 | 5.58856500  | -3.44847000 | -0.68492100 |
| O  | 0 | 8.70177800  | 0.59096100  | -0.15450800 |
| O  | 0 | 6.87019200  | -1.44903300 | -0.51508900 |
| O  | 0 | 6.03299300  | 1.24191400  | -1.41724200 |
| O  | 0 | 2.50979900  | -2.06096400 | -0.63556500 |
| O  | 0 | 5.93601100  | -3.82303100 | 2.04510300  |
| O  | 0 | 5.16321800  | 3.55678600  | -2.26349200 |
| O  | 0 | 4.76079000  | -1.47761100 | 1.27102700  |
| O  | 0 | 3.70631600  | 1.18853400  | 0.34117300  |
| O  | 0 | 4.91384500  | 3.26819900  | 0.49654600  |
| O  | 0 | 6.23050000  | 0.78185200  | 1.34865000  |
| O  | 0 | 7.23844600  | -1.56026100 | 2.12379600  |
| O  | 0 | 5.34169100  | -2.01034700 | 3.80642400  |
| O  | 0 | 4.18810000  | 0.55703500  | 2.95801600  |
| O  | 0 | 5.60451000  | 2.75288000  | 3.08187900  |
| O  | 0 | 6.55419200  | 0.54983800  | 3.97756000  |
| O  | 0 | 6.35501700  | -0.95157100 | -3.14785600 |
| O  | 0 | 5.53270600  | 1.76913200  | -3.98300400 |
| O  | 0 | 4.45252100  | -2.80816600 | -3.06540700 |
| O  | 0 | 3.83707300  | -0.54852500 | -4.00404200 |
| H  | 0 | 3.33225500  | 0.19039700  | 2.65825300  |
| H  | 0 | -4.85190500 | -4.28803300 | 3.60289300  |
| H  | 0 | -6.13642800 | -3.04240000 | 3.71856900  |
| H  | 0 | -6.02693600 | -4.14415100 | 2.29252800  |

|    |   |             |             |             |
|----|---|-------------|-------------|-------------|
| H  | 0 | -5.62232100 | -4.13154200 | -3.02400700 |
| H  | 0 | -6.60397400 | -3.83724000 | -1.58632100 |
| H  | 0 | -6.82188700 | -2.78927400 | -3.03282400 |
| H  | 0 | -3.52391500 | 6.03223100  | -2.32777600 |
| H  | 0 | -4.57781200 | 5.03880300  | -3.41223000 |
| H  | 0 | -5.07681200 | 5.37046500  | -1.74638100 |
| H  | 0 | -2.81293200 | 5.72650400  | 3.28243100  |
| H  | 0 | -4.45665200 | 5.25410800  | 2.79408300  |
| H  | 0 | -3.82184200 | 4.65993100  | 4.34198900  |
| H  | 0 | 5.40915900  | 2.87768000  | -3.06808500 |
| H  | 0 | 6.69466600  | -4.33639700 | 2.33870500  |
| H  | 0 | 3.05046200  | 3.93862200  | 1.72019200  |
| H  | 0 | 1.95433200  | 4.65731100  | 2.90495000  |
| H  | 0 | 2.91132000  | 3.20187700  | 3.36499300  |
| H  | 0 | 2.44501800  | 3.38257900  | -3.70882800 |
| H  | 0 | 1.10207500  | 4.56714500  | -3.84991700 |
| H  | 0 | 2.13020800  | 4.61691700  | -2.41140900 |
| H  | 0 | 0.95641000  | -4.92978900 | -2.71042400 |
| H  | 0 | -0.69007800 | -5.48962600 | -3.10277600 |
| H  | 0 | 0.20405500  | -4.38356400 | -4.22216700 |
| H  | 0 | 0.80652600  | -4.83705600 | 3.30902300  |
| H  | 0 | 0.06365400  | -5.79993500 | 1.98139900  |
| H  | 0 | 1.64211700  | -4.96844400 | 1.75765100  |
| H  | 0 | 7.51623100  | 0.53694800  | 3.90416600  |
| H  | 0 | 6.24726000  | 1.51365400  | 3.73548300  |
| Ir | 0 | -6.45459400 | 2.24769200  | 0.66171100  |
| C  | 0 | -6.95304100 | 3.27560200  | 2.08106300  |
| C  | 0 | -7.26964800 | 3.40287200  | -0.48811100 |
| O  | 0 | -7.24513900 | 3.92277000  | 2.97351900  |
| O  | 0 | -7.76237100 | 4.13163800  | -1.21458100 |
| H  | 0 | 2.39660400  | -0.52156800 | -3.17538600 |

#### Reference:

- [1] I. S. Kim, et al. *Chem Mater* 2015, **27**, 4772.
- [2] Wischert, R.; et al. *J. Am. Chem. Soc.* **2012**, *134*, 14430.
- [3] (a) J. Lu, et al. *Langmuir* 2012, **28**, 12806; (b) A. S. Hoffman, et al. *J Phys Chem Lett* **2016**, *7*, 3854.
- [4] L. Smrcok, et al. *Acta Cryst Sec C* 2006, **C62**, i83.
- [5] M. Chen, et al. *J Mol Struc THEOCHEM* 2015, **1074**, 58.
- [6] M. Rimoldi, et al. *Chem. Mater.* 2017, **29**, 1058.
